# Supplementary material for: Identification of MAP3K4 as a novel regulation factor of hepatic lipid metabolism in non-alcoholic fatty liver disease
Source: J Transl Med. 2022 Nov 14;20:529. doi: 10.1186/s12967-022-03734-8 (PMC9664664; doi:10.1186/s12967-022-03734-8)
Supplement: Supplementary file 6 — Additional file 6: Table S6. Results of GO enrichment on differentially expressed genes from GSE159676 datasets. [file 12967_2022_3734_MOESM6_ESM.xlsx]

## Sheet: Annotation
MyList	Gene ID	Type	Tax ID	Homologene Gene ID	Homologene Gene Tax ID	GO:1990904 ribonucleoprotein complex	GO:0034654 nucleobase-containing compound	GO:0008134 transcription factor binding	GO:0006325 chromatin organization	GO:0022613 ribonucleoprotein complex biog	GO:0016607 nuclear speck	GO:0016570 histone modification	GO:0005740 mitochondrial envelope	GO:0042326 negative regulation of phospho	GO:0009896 positive regulation of catabol	GO:0003712 transcription coregulator acti	GO:0006974 cellular response to DNA damag	GO:1990234 transferase complex	GO:0032446 protein modification by small	GO:1903311 regulation of mRNA metabolic p	GO:0080135 regulation of cellular respons	GO:1903047 mitotic cell cycle process	GO:0043549 regulation of kinase activity	GO:0042803 protein homodimerization activ	GO:0031056 regulation of histone modifica
8-Sep						nan	nan	nan	nan	nan	nan	nan	nan	nan	nan	nan	nan	nan	nan	nan	nan	nan	nan	nan	nan
AAK1	22848	symbol	H. sapiens	22848	H. sapiens	0.0	0.0	0.0	0.0	0.0	0.0	0.0	0.0	0.0	0.0	0.0	0.0	0.0	0.0	0.0	0.0	0.0	0.0	0.0	0.0
AAMP	14	symbol	H. sapiens	14	H. sapiens	0.0	0.0	0.0	0.0	0.0	0.0	0.0	0.0	0.0	0.0	0.0	0.0	0.0	0.0	0.0	0.0	0.0	0.0	0.0	0.0
ABCA1	19	symbol	H. sapiens	19	H. sapiens	0.0	0.0	0.0	0.0	0.0	0.0	0.0	0.0	0.0	0.0	0.0	0.0	0.0	0.0	0.0	0.0	0.0	0.0	0.0	0.0
ABCB6	10058	symbol	H. sapiens	10058	H. sapiens	0.0	1.0	0.0	0.0	0.0	0.0	0.0	1.0	0.0	0.0	0.0	0.0	0.0	0.0	0.0	0.0	0.0	0.0	0.0	0.0
ABCC10	89845	symbol	H. sapiens	89845	H. sapiens	0.0	0.0	0.0	0.0	0.0	0.0	0.0	0.0	0.0	0.0	0.0	0.0	0.0	0.0	0.0	0.0	0.0	0.0	0.0	0.0
ABCG2	9429	symbol	H. sapiens	9429	H. sapiens	0.0	0.0	0.0	0.0	0.0	0.0	0.0	1.0	0.0	0.0	0.0	0.0	0.0	0.0	0.0	0.0	0.0	0.0	1.0	0.0
ABT1	29777	symbol	H. sapiens	29777	H. sapiens	1.0	1.0	1.0	0.0	1.0	0.0	0.0	0.0	0.0	0.0	1.0	0.0	0.0	0.0	0.0	0.0	0.0	0.0	0.0	0.0
ACADS	35	symbol	H. sapiens	35	H. sapiens	0.0	0.0	0.0	0.0	0.0	0.0	0.0	1.0	0.0	0.0	0.0	0.0	0.0	0.0	0.0	0.0	0.0	0.0	0.0	0.0
ACADSB	36	symbol	H. sapiens	36	H. sapiens	0.0	0.0	0.0	0.0	0.0	0.0	0.0	1.0	0.0	0.0	0.0	0.0	0.0	0.0	0.0	0.0	0.0	0.0	0.0	0.0
ACOT12	134526	symbol	H. sapiens	134526	H. sapiens	0.0	0.0	0.0	0.0	0.0	0.0	0.0	0.0	0.0	0.0	0.0	0.0	0.0	0.0	0.0	0.0	0.0	0.0	0.0	0.0
ACOT2	10965	symbol	H. sapiens	10965	H. sapiens	0.0	0.0	0.0	0.0	0.0	0.0	0.0	1.0	0.0	0.0	0.0	0.0	0.0	0.0	0.0	0.0	0.0	0.0	0.0	0.0
ACOT4	122970	symbol	H. sapiens	122970	H. sapiens	0.0	0.0	0.0	0.0	0.0	0.0	0.0	0.0	0.0	0.0	0.0	0.0	0.0	0.0	0.0	0.0	0.0	0.0	0.0	0.0
ACOT8	10005	symbol	H. sapiens	10005	H. sapiens	0.0	0.0	0.0	0.0	0.0	0.0	0.0	0.0	0.0	0.0	0.0	0.0	0.0	0.0	0.0	0.0	1.0	0.0	0.0	0.0
ACP1	52	symbol	H. sapiens	52	H. sapiens	0.0	0.0	0.0	0.0	0.0	0.0	0.0	0.0	0.0	0.0	0.0	0.0	0.0	0.0	0.0	0.0	0.0	0.0	0.0	0.0
ACRC	93953	gene_synonym	H. sapiens	93953	H. sapiens	0.0	0.0	0.0	0.0	0.0	0.0	0.0	0.0	0.0	0.0	0.0	1.0	0.0	0.0	0.0	0.0	0.0	0.0	0.0	0.0
ACSM2A	123876	symbol	H. sapiens	123876	H. sapiens	0.0	0.0	0.0	0.0	0.0	0.0	0.0	1.0	0.0	0.0	0.0	0.0	0.0	0.0	0.0	0.0	0.0	0.0	0.0	0.0
ACTR3C	653857	symbol	H. sapiens	653857	H. sapiens	0.0	0.0	0.0	0.0	0.0	0.0	0.0	0.0	0.0	0.0	0.0	0.0	0.0	0.0	0.0	0.0	0.0	0.0	0.0	0.0
ADAM20	8748	symbol	H. sapiens	8748	H. sapiens	0.0	0.0	0.0	0.0	0.0	0.0	0.0	0.0	0.0	0.0	0.0	0.0	0.0	0.0	0.0	0.0	0.0	0.0	0.0	0.0
ADAMTS1	9510	symbol	H. sapiens	9510	H. sapiens	0.0	0.0	0.0	0.0	0.0	0.0	0.0	0.0	0.0	0.0	0.0	0.0	0.0	0.0	0.0	0.0	0.0	0.0	0.0	0.0
AFDN	4301	symbol	H. sapiens	4301	H. sapiens	0.0	0.0	0.0	0.0	0.0	1.0	0.0	0.0	0.0	0.0	0.0	0.0	0.0	0.0	0.0	0.0	0.0	0.0	0.0	0.0
AGO3	192669	symbol	H. sapiens	192669	H. sapiens	1.0	0.0	0.0	0.0	1.0	0.0	0.0	0.0	0.0	0.0	0.0	0.0	0.0	0.0	1.0	0.0	0.0	0.0	0.0	0.0
AGTR1	185	symbol	H. sapiens	185	H. sapiens	0.0	0.0	0.0	0.0	0.0	0.0	0.0	0.0	0.0	0.0	0.0	0.0	0.0	0.0	0.0	0.0	0.0	0.0	0.0	0.0
AHCYL1	10768	symbol	H. sapiens	10768	H. sapiens	1.0	0.0	0.0	0.0	0.0	0.0	0.0	0.0	0.0	0.0	0.0	0.0	0.0	0.0	1.0	0.0	0.0	0.0	0.0	0.0
AIDA	64853	symbol	H. sapiens	64853	H. sapiens	0.0	0.0	0.0	0.0	0.0	0.0	0.0	0.0	1.0	0.0	0.0	0.0	0.0	0.0	0.0	1.0	0.0	1.0	0.0	0.0
AIMP1	9255	symbol	H. sapiens	9255	H. sapiens	0.0	0.0	0.0	0.0	0.0	0.0	0.0	0.0	0.0	0.0	0.0	0.0	0.0	0.0	0.0	0.0	0.0	0.0	1.0	0.0
AKR1C8P	340811	gene_synonym	H. sapiens	340811	H. sapiens	0.0	0.0	0.0	0.0	0.0	0.0	0.0	0.0	0.0	0.0	0.0	0.0	0.0	0.0	0.0	0.0	0.0	0.0	0.0	0.0
AKR7A2P1	246182	symbol	H. sapiens	246182	H. sapiens	0.0	0.0	0.0	0.0	0.0	0.0	0.0	0.0	0.0	0.0	0.0	0.0	0.0	0.0	0.0	0.0	0.0	0.0	0.0	0.0
AKT1	207	symbol	H. sapiens	207	H. sapiens	0.0	0.0	0.0	0.0	0.0	0.0	0.0	0.0	1.0	1.0	0.0	0.0	0.0	1.0	1.0	1.0	0.0	1.0	1.0	0.0
ALG13	79868	symbol	H. sapiens	79868	H. sapiens	0.0	0.0	0.0	0.0	0.0	0.0	0.0	0.0	0.0	0.0	0.0	0.0	0.0	0.0	0.0	0.0	0.0	0.0	0.0	0.0
ALMS1	7840	symbol	H. sapiens	7840	H. sapiens	0.0	0.0	0.0	0.0	0.0	0.0	0.0	0.0	0.0	0.0	0.0	0.0	0.0	0.0	0.0	0.0	0.0	0.0	0.0	0.0
AMDHD1	144193	symbol	H. sapiens	144193	H. sapiens	0.0	0.0	0.0	0.0	0.0	0.0	0.0	0.0	0.0	0.0	0.0	0.0	0.0	0.0	0.0	0.0	0.0	0.0	0.0	0.0
AMN	81693	symbol	H. sapiens	81693	H. sapiens	0.0	0.0	0.0	0.0	0.0	0.0	0.0	0.0	0.0	0.0	0.0	0.0	0.0	0.0	0.0	0.0	0.0	0.0	0.0	0.0
ANAPC13	25847	symbol	H. sapiens	25847	H. sapiens	0.0	0.0	0.0	0.0	0.0	0.0	0.0	0.0	0.0	0.0	0.0	0.0	1.0	1.0	0.0	0.0	1.0	0.0	0.0	0.0
ANGPT2	285	symbol	H. sapiens	285	H. sapiens	0.0	0.0	0.0	0.0	0.0	0.0	0.0	0.0	0.0	0.0	0.0	0.0	0.0	0.0	0.0	0.0	0.0	0.0	0.0	0.0
ANGPTL4	51129	symbol	H. sapiens	51129	H. sapiens	0.0	0.0	0.0	0.0	0.0	0.0	0.0	0.0	1.0	0.0	0.0	0.0	0.0	0.0	0.0	0.0	0.0	0.0	0.0	0.0
ANKAR	150709	symbol	H. sapiens	150709	H. sapiens	0.0	0.0	0.0	0.0	0.0	0.0	0.0	0.0	0.0	0.0	0.0	0.0	0.0	0.0	0.0	0.0	0.0	0.0	0.0	0.0
ANKH	56172	symbol	H. sapiens	56172	H. sapiens	0.0	0.0	0.0	0.0	0.0	0.0	0.0	0.0	0.0	0.0	0.0	0.0	0.0	0.0	0.0	0.0	0.0	0.0	0.0	0.0
ANKRD16	54522	symbol	H. sapiens	54522	H. sapiens	0.0	0.0	0.0	0.0	1.0	0.0	0.0	0.0	0.0	0.0	0.0	0.0	0.0	0.0	0.0	0.0	0.0	0.0	0.0	0.0
ANKRD36B	57730	symbol	H. sapiens	57730	H. sapiens	0.0	0.0	0.0	0.0	0.0	0.0	0.0	0.0	0.0	0.0	0.0	0.0	0.0	0.0	0.0	0.0	0.0	0.0	0.0	0.0
ANKRD37	353322	symbol	H. sapiens	353322	H. sapiens	0.0	0.0	0.0	0.0	0.0	0.0	0.0	0.0	0.0	0.0	0.0	0.0	0.0	0.0	0.0	0.0	0.0	0.0	0.0	0.0
ANKRD44	91526	symbol	H. sapiens	91526	H. sapiens	0.0	0.0	0.0	0.0	0.0	0.0	0.0	0.0	0.0	0.0	0.0	0.0	0.0	0.0	0.0	0.0	0.0	0.0	0.0	0.0
ANP32A	8125	symbol	H. sapiens	8125	H. sapiens	0.0	0.0	0.0	0.0	0.0	0.0	0.0	0.0	0.0	0.0	0.0	0.0	0.0	0.0	0.0	0.0	0.0	0.0	0.0	0.0
ANP32A-IT1	80035	symbol	H. sapiens	80035	H. sapiens	0.0	0.0	0.0	0.0	0.0	0.0	0.0	0.0	0.0	0.0	0.0	0.0	0.0	0.0	0.0	0.0	0.0	0.0	0.0	0.0
ANP32E	81611	symbol	H. sapiens	81611	H. sapiens	0.0	0.0	0.0	1.0	0.0	0.0	0.0	0.0	1.0	0.0	0.0	0.0	0.0	0.0	0.0	0.0	0.0	0.0	0.0	0.0
ANTXR2	118429	symbol	H. sapiens	118429	H. sapiens	0.0	0.0	0.0	0.0	0.0	0.0	0.0	0.0	0.0	0.0	0.0	0.0	0.0	0.0	0.0	0.0	0.0	0.0	0.0	0.0
ANXA10	11199	symbol	H. sapiens	11199	H. sapiens	0.0	0.0	0.0	0.0	0.0	0.0	0.0	0.0	0.0	0.0	0.0	0.0	0.0	0.0	0.0	0.0	0.0	0.0	0.0	0.0
AOC1	26	symbol	H. sapiens	26	H. sapiens	0.0	0.0	0.0	0.0	0.0	0.0	0.0	0.0	0.0	0.0	0.0	0.0	0.0	0.0	0.0	0.0	0.0	0.0	1.0	0.0
APLP2	334	symbol	H. sapiens	334	H. sapiens	0.0	0.0	0.0	0.0	0.0	0.0	0.0	0.0	1.0	1.0	0.0	0.0	0.0	0.0	0.0	0.0	0.0	0.0	0.0	0.0
APMAP	57136	symbol	H. sapiens	57136	H. sapiens	0.0	0.0	0.0	0.0	0.0	0.0	0.0	0.0	0.0	0.0	0.0	0.0	0.0	0.0	0.0	0.0	0.0	0.0	0.0	0.0
APOBEC3F	200316	symbol	H. sapiens	200316	H. sapiens	1.0	0.0	0.0	0.0	0.0	0.0	0.0	0.0	0.0	0.0	0.0	1.0	0.0	0.0	1.0	0.0	0.0	0.0	0.0	0.0
APOF	319	symbol	H. sapiens	319	H. sapiens	0.0	0.0	0.0	0.0	0.0	0.0	0.0	0.0	0.0	0.0	0.0	0.0	0.0	0.0	0.0	0.0	0.0	0.0	0.0	0.0
APPBP2	10513	symbol	H. sapiens	10513	H. sapiens	0.0	0.0	0.0	0.0	0.0	0.0	0.0	0.0	0.0	0.0	0.0	0.0	1.0	1.0	0.0	0.0	0.0	0.0	0.0	0.0
AREG	374	symbol	H. sapiens	374	H. sapiens	0.0	0.0	0.0	0.0	0.0	0.0	0.0	0.0	0.0	0.0	0.0	0.0	0.0	0.0	0.0	0.0	0.0	1.0	0.0	0.0
ARF1	375	symbol	H. sapiens	375	H. sapiens	0.0	0.0	0.0	0.0	0.0	0.0	0.0	0.0	0.0	0.0	0.0	0.0	0.0	0.0	0.0	0.0	1.0	0.0	0.0	0.0
ARF6	382	symbol	H. sapiens	382	H. sapiens	0.0	0.0	0.0	0.0	0.0	0.0	0.0	0.0	0.0	0.0	0.0	0.0	0.0	0.0	0.0	0.0	1.0	0.0	0.0	0.0
ARFIP2	23647	symbol	H. sapiens	23647	H. sapiens	0.0	0.0	0.0	0.0	0.0	0.0	0.0	0.0	0.0	0.0	0.0	0.0	0.0	0.0	0.0	0.0	0.0	0.0	0.0	0.0
ARHGAP17	55114	symbol	H. sapiens	55114	H. sapiens	0.0	0.0	0.0	0.0	0.0	0.0	0.0	0.0	0.0	0.0	0.0	0.0	0.0	0.0	0.0	0.0	0.0	0.0	0.0	0.0
ARHGDIA	396	symbol	H. sapiens	396	H. sapiens	0.0	0.0	0.0	0.0	0.0	0.0	0.0	0.0	0.0	0.0	0.0	0.0	0.0	0.0	0.0	0.0	0.0	0.0	0.0	0.0
ARID1A	8289	symbol	H. sapiens	8289	H. sapiens	0.0	0.0	1.0	1.0	0.0	0.0	0.0	0.0	0.0	0.0	1.0	0.0	0.0	0.0	0.0	0.0	0.0	0.0	0.0	0.0
ARL5B	221079	symbol	H. sapiens	221079	H. sapiens	0.0	0.0	0.0	0.0	0.0	0.0	0.0	0.0	0.0	0.0	0.0	0.0	0.0	0.0	0.0	0.0	0.0	0.0	0.0	0.0
ARMC10	83787	symbol	H. sapiens	83787	H. sapiens	0.0	0.0	0.0	0.0	0.0	0.0	0.0	0.0	1.0	0.0	0.0	0.0	0.0	0.0	0.0	0.0	0.0	0.0	0.0	0.0
ARMCX3	51566	symbol	H. sapiens	51566	H. sapiens	0.0	0.0	0.0	0.0	0.0	0.0	0.0	1.0	0.0	0.0	0.0	0.0	0.0	0.0	0.0	0.0	0.0	0.0	0.0	0.0
ARPC5	10092	symbol	H. sapiens	10092	H. sapiens	0.0	0.0	0.0	0.0	0.0	0.0	0.0	0.0	0.0	0.0	0.0	1.0	0.0	0.0	0.0	0.0	0.0	0.0	0.0	0.0
ARRDC1	92714	symbol	H. sapiens	92714	H. sapiens	0.0	0.0	0.0	0.0	0.0	0.0	0.0	0.0	0.0	0.0	0.0	0.0	0.0	1.0	0.0	0.0	0.0	0.0	0.0	0.0
ASB16-AS1	339201	symbol	H. sapiens	339201	H. sapiens	0.0	0.0	0.0	0.0	0.0	0.0	0.0	0.0	0.0	0.0	0.0	0.0	0.0	0.0	0.0	0.0	0.0	0.0	0.0	0.0
ASGR1	432	symbol	H. sapiens	432	H. sapiens	0.0	0.0	0.0	0.0	0.0	0.0	0.0	0.0	0.0	0.0	0.0	0.0	0.0	0.0	0.0	0.0	0.0	0.0	0.0	0.0
ASMTL	8623	symbol	H. sapiens	8623	H. sapiens	0.0	0.0	0.0	0.0	0.0	0.0	1.0	0.0	0.0	0.0	0.0	0.0	0.0	0.0	0.0	0.0	0.0	0.0	0.0	0.0
ASMTL-AS1	80161	symbol	H. sapiens	80161	H. sapiens	0.0	0.0	0.0	0.0	0.0	0.0	0.0	0.0	0.0	0.0	0.0	0.0	0.0	0.0	0.0	0.0	0.0	0.0	0.0	0.0
ASNSD1	54529	symbol	H. sapiens	54529	H. sapiens	0.0	0.0	0.0	0.0	0.0	0.0	0.0	0.0	0.0	0.0	0.0	0.0	0.0	0.0	0.0	0.0	0.0	0.0	0.0	0.0
ATAD2	29028	symbol	H. sapiens	29028	H. sapiens	0.0	0.0	0.0	1.0	0.0	0.0	0.0	0.0	0.0	0.0	0.0	0.0	0.0	0.0	0.0	0.0	0.0	0.0	0.0	0.0
ATF3	467	symbol	H. sapiens	467	H. sapiens	0.0	0.0	1.0	0.0	0.0	0.0	0.0	0.0	1.0	0.0	0.0	0.0	0.0	0.0	0.0	0.0	0.0	0.0	1.0	0.0
ATF4	468	symbol	H. sapiens	468	H. sapiens	1.0	1.0	1.0	0.0	0.0	1.0	0.0	0.0	0.0	0.0	0.0	0.0	0.0	0.0	1.0	1.0	0.0	0.0	0.0	0.0
ATF7	11016	symbol	H. sapiens	11016	H. sapiens	0.0	0.0	1.0	0.0	0.0	0.0	0.0	0.0	0.0	0.0	0.0	0.0	0.0	0.0	0.0	0.0	0.0	0.0	0.0	0.0
ATF7IP	55729	symbol	H. sapiens	55729	H. sapiens	0.0	0.0	1.0	0.0	0.0	0.0	1.0	0.0	0.0	0.0	1.0	1.0	0.0	0.0	0.0	0.0	0.0	0.0	0.0	0.0
ATG101	60673	symbol	H. sapiens	60673	H. sapiens	0.0	0.0	0.0	0.0	0.0	0.0	0.0	0.0	0.0	0.0	0.0	0.0	1.0	0.0	0.0	0.0	0.0	0.0	0.0	0.0
ATG2A	23130	symbol	H. sapiens	23130	H. sapiens	0.0	0.0	0.0	0.0	0.0	0.0	0.0	0.0	0.0	1.0	0.0	0.0	0.0	0.0	0.0	0.0	0.0	0.0	0.0	0.0
ATL3	25923	symbol	H. sapiens	25923	H. sapiens	0.0	0.0	0.0	0.0	0.0	0.0	0.0	0.0	0.0	0.0	0.0	0.0	0.0	0.0	0.0	0.0	0.0	0.0	0.0	0.0
ATM	472	symbol	H. sapiens	472	H. sapiens	1.0	0.0	0.0	0.0	0.0	0.0	1.0	0.0	1.0	1.0	0.0	1.0	0.0	1.0	0.0	1.0	1.0	1.0	0.0	1.0
ATN1	1822	symbol	H. sapiens	1822	H. sapiens	0.0	0.0	0.0	0.0	0.0	0.0	0.0	0.0	0.0	0.0	1.0	0.0	0.0	0.0	0.0	0.0	0.0	0.0	0.0	0.0
ATP1B1	481	symbol	H. sapiens	481	H. sapiens	0.0	0.0	0.0	0.0	0.0	0.0	0.0	0.0	0.0	0.0	0.0	0.0	0.0	0.0	0.0	0.0	0.0	0.0	0.0	0.0
ATP5D	513	gene_synonym	H. sapiens	513	H. sapiens	0.0	1.0	0.0	0.0	0.0	0.0	0.0	1.0	0.0	0.0	0.0	0.0	0.0	0.0	0.0	0.0	0.0	0.0	0.0	0.0
ATP5J	522	gene_synonym	H. sapiens	522	H. sapiens	0.0	1.0	0.0	0.0	0.0	0.0	0.0	1.0	0.0	0.0	0.0	0.0	0.0	0.0	0.0	0.0	0.0	0.0	0.0	0.0
ATP5L2	267020	gene_synonym	H. sapiens	267020	H. sapiens	0.0	1.0	0.0	0.0	0.0	0.0	0.0	1.0	0.0	0.0	0.0	0.0	0.0	0.0	0.0	0.0	0.0	0.0	0.0	0.0
ATP5S	27109	gene_synonym	H. sapiens	27109	H. sapiens	0.0	1.0	0.0	0.0	0.0	0.0	0.0	1.0	0.0	0.0	0.0	0.0	0.0	0.0	0.0	0.0	0.0	0.0	0.0	0.0
ATP6V1F	9296	symbol	H. sapiens	9296	H. sapiens	0.0	0.0	0.0	0.0	0.0	0.0	0.0	0.0	0.0	0.0	0.0	0.0	0.0	0.0	0.0	0.0	0.0	0.0	0.0	0.0
ATR	545	symbol	H. sapiens	545	H. sapiens	0.0	0.0	0.0	0.0	0.0	0.0	0.0	0.0	0.0	0.0	0.0	1.0	0.0	0.0	0.0	1.0	0.0	0.0	0.0	0.0
ATXN2	6311	symbol	H. sapiens	6311	H. sapiens	1.0	0.0	0.0	0.0	0.0	0.0	0.0	0.0	0.0	0.0	0.0	0.0	0.0	0.0	1.0	0.0	0.0	0.0	0.0	0.0
ATXN7	6314	symbol	H. sapiens	6314	H. sapiens	0.0	0.0	0.0	0.0	0.0	0.0	1.0	0.0	0.0	0.0	0.0	0.0	0.0	0.0	0.0	0.0	0.0	0.0	0.0	0.0
ATXN7L1	222255	symbol	H. sapiens	222255	H. sapiens	0.0	0.0	0.0	0.0	0.0	0.0	0.0	0.0	0.0	0.0	0.0	0.0	0.0	0.0	0.0	0.0	0.0	0.0	0.0	0.0
AURKAIP1	54998	symbol	H. sapiens	54998	H. sapiens	1.0	0.0	0.0	0.0	0.0	0.0	0.0	1.0	0.0	1.0	0.0	0.0	0.0	0.0	0.0	0.0	0.0	0.0	0.0	0.0
AUTS2	26053	symbol	H. sapiens	26053	H. sapiens	0.0	0.0	0.0	0.0	0.0	0.0	0.0	0.0	0.0	0.0	0.0	0.0	0.0	0.0	0.0	0.0	0.0	0.0	0.0	1.0
AVPI1	60370	symbol	H. sapiens	60370	H. sapiens	0.0	0.0	0.0	0.0	0.0	0.0	0.0	0.0	0.0	0.0	0.0	0.0	0.0	0.0	0.0	0.0	0.0	0.0	0.0	0.0
AXIN1	8312	symbol	H. sapiens	8312	H. sapiens	0.0	0.0	0.0	0.0	0.0	0.0	0.0	0.0	1.0	1.0	0.0	0.0	0.0	1.0	0.0	1.0	0.0	1.0	1.0	0.0
AZIN1	51582	symbol	H. sapiens	51582	H. sapiens	0.0	0.0	0.0	0.0	0.0	0.0	0.0	0.0	0.0	1.0	0.0	0.0	0.0	0.0	0.0	0.0	0.0	0.0	0.0	0.0
BAG5	9529	symbol	H. sapiens	9529	H. sapiens	0.0	0.0	0.0	0.0	0.0	0.0	0.0	0.0	1.0	1.0	0.0	0.0	0.0	0.0	0.0	1.0	0.0	0.0	0.0	0.0
BAGE2	85319	symbol	H. sapiens	85319	H. sapiens	0.0	0.0	0.0	0.0	0.0	0.0	0.0	0.0	0.0	0.0	0.0	0.0	0.0	0.0	0.0	0.0	0.0	0.0	0.0	0.0
BAGE3	85318	symbol	H. sapiens	85318	H. sapiens	0.0	0.0	0.0	0.0	0.0	0.0	0.0	0.0	0.0	0.0	0.0	0.0	0.0	0.0	0.0	0.0	0.0	0.0	0.0	0.0
BAGE4	85317	symbol	H. sapiens	85317	H. sapiens	0.0	0.0	0.0	0.0	0.0	0.0	0.0	0.0	0.0	0.0	0.0	0.0	0.0	0.0	0.0	0.0	0.0	0.0	0.0	0.0
BAGE5	85316	symbol	H. sapiens	85316	H. sapiens	0.0	0.0	0.0	0.0	0.0	0.0	0.0	0.0	0.0	0.0	0.0	0.0	0.0	0.0	0.0	0.0	0.0	0.0	0.0	0.0
BANF1	8815	symbol	H. sapiens	8815	H. sapiens	0.0	0.0	0.0	1.0	0.0	0.0	0.0	0.0	0.0	0.0	0.0	1.0	0.0	0.0	0.0	0.0	1.0	0.0	1.0	0.0
BAZ2A	11176	symbol	H. sapiens	11176	H. sapiens	0.0	1.0	1.0	1.0	0.0	1.0	1.0	0.0	0.0	0.0	0.0	1.0	0.0	0.0	0.0	0.0	0.0	0.0	0.0	0.0
BAZ2B	29994	symbol	H. sapiens	29994	H. sapiens	0.0	0.0	0.0	1.0	0.0	0.0	0.0	0.0	0.0	0.0	0.0	0.0	0.0	0.0	0.0	0.0	0.0	0.0	0.0	0.0
BCL2L1	598	symbol	H. sapiens	598	H. sapiens	0.0	0.0	0.0	0.0	0.0	0.0	0.0	1.0	1.0	0.0	0.0	1.0	0.0	0.0	0.0	1.0	0.0	0.0	1.0	0.0
BCL2L13	23786	symbol	H. sapiens	23786	H. sapiens	0.0	0.0	0.0	0.0	0.0	0.0	0.0	1.0	0.0	1.0	0.0	0.0	0.0	0.0	0.0	0.0	0.0	0.0	0.0	0.0
BFAR	51283	symbol	H. sapiens	51283	H. sapiens	0.0	0.0	0.0	0.0	0.0	0.0	0.0	0.0	0.0	0.0	0.0	0.0	0.0	1.0	0.0	1.0	0.0	0.0	0.0	0.0
BIN3-IT1	80094	symbol	H. sapiens	80094	H. sapiens	0.0	0.0	0.0	0.0	0.0	0.0	0.0	0.0	0.0	0.0	0.0	0.0	0.0	0.0	0.0	0.0	0.0	0.0	0.0	0.0
BLNK	29760	symbol	H. sapiens	29760	H. sapiens	0.0	0.0	0.0	0.0	0.0	0.0	0.0	0.0	0.0	0.0	0.0	0.0	0.0	0.0	1.0	0.0	0.0	0.0	0.0	0.0
BLOC1S6	26258	symbol	H. sapiens	26258	H. sapiens	0.0	0.0	0.0	0.0	0.0	0.0	0.0	0.0	0.0	0.0	0.0	0.0	0.0	0.0	0.0	0.0	0.0	0.0	1.0	0.0
BMP10	27302	symbol	H. sapiens	27302	H. sapiens	0.0	0.0	0.0	0.0	0.0	0.0	0.0	0.0	0.0	0.0	0.0	0.0	0.0	0.0	0.0	0.0	0.0	1.0	0.0	0.0
BMT2	154743	symbol	H. sapiens	154743	H. sapiens	0.0	0.0	0.0	0.0	0.0	0.0	1.0	0.0	1.0	0.0	0.0	0.0	0.0	0.0	0.0	0.0	0.0	0.0	0.0	0.0
BORA	79866	symbol	H. sapiens	79866	H. sapiens	0.0	0.0	0.0	0.0	0.0	0.0	0.0	0.0	0.0	0.0	0.0	0.0	0.0	0.0	0.0	0.0	1.0	1.0	0.0	0.0
BORCS5	118426	symbol	H. sapiens	118426	H. sapiens	0.0	0.0	0.0	0.0	0.0	0.0	0.0	0.0	0.0	0.0	0.0	0.0	0.0	0.0	0.0	0.0	0.0	0.0	0.0	0.0
BPTF	2186	symbol	H. sapiens	2186	H. sapiens	0.0	0.0	0.0	1.0	0.0	0.0	0.0	0.0	0.0	0.0	0.0	0.0	0.0	0.0	0.0	0.0	0.0	0.0	0.0	0.0
BRCA2	675	symbol	H. sapiens	675	H. sapiens	0.0	0.0	0.0	0.0	0.0	0.0	1.0	0.0	0.0	0.0	0.0	1.0	1.0	0.0	0.0	0.0	1.0	0.0	0.0	0.0
BRD3	8019	symbol	H. sapiens	8019	H. sapiens	0.0	0.0	0.0	1.0	0.0	0.0	0.0	0.0	0.0	0.0	0.0	0.0	0.0	0.0	0.0	0.0	0.0	0.0	0.0	0.0
BROX	148362	symbol	H. sapiens	148362	H. sapiens	0.0	0.0	0.0	0.0	0.0	0.0	0.0	0.0	0.0	0.0	0.0	0.0	0.0	0.0	0.0	0.0	0.0	0.0	0.0	0.0
BTBD6	90135	symbol	H. sapiens	90135	H. sapiens	0.0	0.0	0.0	0.0	0.0	0.0	0.0	0.0	0.0	0.0	0.0	0.0	0.0	0.0	0.0	0.0	0.0	0.0	0.0	0.0
BTBD7	55727	symbol	H. sapiens	55727	H. sapiens	0.0	0.0	0.0	0.0	0.0	0.0	0.0	0.0	0.0	0.0	0.0	0.0	0.0	0.0	0.0	0.0	0.0	0.0	0.0	0.0
BZW1	9689	symbol	H. sapiens	9689	H. sapiens	0.0	0.0	0.0	0.0	0.0	0.0	0.0	0.0	0.0	0.0	0.0	0.0	0.0	0.0	1.0	0.0	0.0	0.0	0.0	0.0
BZW2	28969	symbol	H. sapiens	28969	H. sapiens	0.0	0.0	0.0	0.0	0.0	0.0	0.0	0.0	0.0	0.0	0.0	0.0	0.0	0.0	1.0	0.0	0.0	0.0	0.0	0.0
C11orf58	10944	symbol	H. sapiens	10944	H. sapiens	0.0	0.0	0.0	0.0	0.0	0.0	0.0	0.0	0.0	0.0	0.0	0.0	0.0	0.0	0.0	0.0	0.0	0.0	0.0	0.0
C14orf169	79697	gene_synonym	H. sapiens	79697	H. sapiens	0.0	0.0	0.0	1.0	0.0	0.0	1.0	0.0	0.0	0.0	0.0	0.0	0.0	0.0	0.0	0.0	0.0	0.0	0.0	0.0
C17orf58	284018	symbol	H. sapiens	284018	H. sapiens	0.0	0.0	0.0	0.0	0.0	0.0	0.0	0.0	0.0	0.0	0.0	0.0	0.0	0.0	0.0	0.0	0.0	0.0	0.0	0.0
C19orf54	284325	symbol	H. sapiens	284325	H. sapiens	0.0	0.0	0.0	0.0	0.0	0.0	0.0	0.0	0.0	0.0	0.0	0.0	0.0	0.0	0.0	0.0	0.0	0.0	0.0	0.0
C19orf60	55049	gene_synonym	H. sapiens	55049	H. sapiens	0.0	0.0	0.0	0.0	0.0	0.0	0.0	0.0	0.0	0.0	0.0	0.0	0.0	0.0	0.0	0.0	0.0	0.0	0.0	0.0
C1orf101	257044	gene_synonym	H. sapiens	257044	H. sapiens	0.0	0.0	0.0	0.0	0.0	0.0	0.0	0.0	0.0	0.0	0.0	0.0	0.0	0.0	0.0	0.0	0.0	0.0	0.0	0.0
C1orf54	79630	symbol	H. sapiens	79630	H. sapiens	0.0	0.0	0.0	0.0	0.0	0.0	0.0	0.0	0.0	0.0	0.0	0.0	0.0	0.0	0.0	0.0	0.0	0.0	0.0	0.0
C21orf91	54149	symbol	H. sapiens	54149	H. sapiens	0.0	0.0	0.0	0.0	0.0	0.0	0.0	0.0	0.0	0.0	0.0	0.0	0.0	0.0	0.0	0.0	0.0	0.0	0.0	0.0
C2CD2	25966	symbol	H. sapiens	25966	H. sapiens	0.0	0.0	0.0	0.0	0.0	0.0	0.0	0.0	0.0	0.0	0.0	0.0	0.0	0.0	0.0	0.0	0.0	0.0	0.0	0.0
C2CD3	26005	symbol	H. sapiens	26005	H. sapiens	0.0	0.0	0.0	0.0	0.0	0.0	0.0	0.0	0.0	1.0	0.0	0.0	0.0	0.0	0.0	0.0	0.0	0.0	0.0	0.0
C3orf35	339883	gene_synonym	H. sapiens	339883	H. sapiens	0.0	0.0	0.0	0.0	0.0	0.0	0.0	0.0	0.0	0.0	0.0	0.0	0.0	0.0	0.0	0.0	0.0	0.0	0.0	0.0
C4BPB	725	symbol	H. sapiens	725	H. sapiens	0.0	0.0	0.0	0.0	0.0	0.0	0.0	0.0	0.0	1.0	0.0	0.0	0.0	0.0	0.0	0.0	0.0	0.0	0.0	0.0
C5orf42	65250	gene_synonym	H. sapiens	65250	H. sapiens	0.0	0.0	0.0	0.0	0.0	0.0	0.0	0.0	0.0	0.0	0.0	0.0	0.0	0.0	0.0	0.0	0.0	0.0	0.0	0.0
C5orf56	441108	gene_synonym	H. sapiens	441108	H. sapiens	0.0	0.0	0.0	0.0	0.0	0.0	0.0	0.0	0.0	0.0	0.0	0.0	0.0	0.0	0.0	0.0	0.0	0.0	0.0	0.0
C6orf136	221545	symbol	H. sapiens	221545	H. sapiens	0.0	0.0	0.0	0.0	0.0	0.0	0.0	0.0	0.0	0.0	0.0	0.0	0.0	0.0	0.0	0.0	0.0	0.0	0.0	0.0
C6orf163	206412	symbol	H. sapiens	206412	H. sapiens	0.0	0.0	0.0	0.0	0.0	0.0	0.0	0.0	0.0	0.0	0.0	0.0	0.0	0.0	0.0	0.0	0.0	0.0	0.0	0.0
C6orf47	57827	symbol	H. sapiens	57827	H. sapiens	0.0	0.0	0.0	0.0	0.0	0.0	0.0	0.0	0.0	0.0	0.0	0.0	0.0	0.0	0.0	0.0	0.0	0.0	0.0	0.0
C8orf37	157657	gene_synonym	H. sapiens	157657	H. sapiens	0.0	0.0	0.0	0.0	0.0	0.0	0.0	0.0	0.0	0.0	0.0	0.0	0.0	0.0	0.0	0.0	0.0	0.0	0.0	0.0
C8orf4	56892	gene_synonym	H. sapiens	56892	H. sapiens	0.0	0.0	0.0	0.0	0.0	1.0	0.0	0.0	1.0	0.0	0.0	0.0	0.0	0.0	0.0	0.0	0.0	1.0	0.0	0.0
C9orf131	138724	symbol	H. sapiens	138724	H. sapiens	0.0	0.0	0.0	0.0	0.0	0.0	0.0	0.0	0.0	0.0	0.0	0.0	0.0	0.0	0.0	0.0	0.0	0.0	0.0	0.0
C9orf72	203228	symbol	H. sapiens	203228	H. sapiens	0.0	0.0	0.0	0.0	0.0	0.0	0.0	0.0	1.0	1.0	0.0	0.0	1.0	0.0	1.0	0.0	0.0	0.0	0.0	0.0
CA5B	11238	symbol	H. sapiens	11238	H. sapiens	0.0	0.0	0.0	0.0	0.0	0.0	0.0	1.0	0.0	0.0	0.0	0.0	0.0	0.0	0.0	0.0	0.0	0.0	0.0	0.0
CACHD1	57685	symbol	H. sapiens	57685	H. sapiens	0.0	0.0	0.0	0.0	0.0	0.0	0.0	0.0	0.0	0.0	0.0	0.0	0.0	0.0	0.0	0.0	0.0	0.0	0.0	0.0
CACNA1D	776	symbol	H. sapiens	776	H. sapiens	0.0	0.0	0.0	0.0	0.0	0.0	0.0	0.0	0.0	0.0	0.0	0.0	0.0	0.0	0.0	0.0	0.0	0.0	0.0	0.0
CADM1	23705	symbol	H. sapiens	23705	H. sapiens	0.0	0.0	0.0	0.0	0.0	0.0	0.0	0.0	0.0	0.0	0.0	0.0	0.0	0.0	0.0	0.0	0.0	0.0	1.0	0.0
CALCOCO2	10241	symbol	H. sapiens	10241	H. sapiens	0.0	0.0	0.0	0.0	0.0	0.0	0.0	0.0	0.0	1.0	0.0	0.0	0.0	0.0	0.0	0.0	0.0	0.0	1.0	0.0
CANX	821	symbol	H. sapiens	821	H. sapiens	0.0	0.0	0.0	0.0	0.0	0.0	0.0	0.0	0.0	0.0	0.0	0.0	0.0	1.0	0.0	0.0	0.0	0.0	0.0	0.0
CAP2	10486	symbol	H. sapiens	10486	H. sapiens	0.0	0.0	0.0	0.0	0.0	0.0	0.0	0.0	0.0	0.0	0.0	0.0	0.0	0.0	0.0	0.0	0.0	0.0	0.0	0.0
CAPS2	84698	symbol	H. sapiens	84698	H. sapiens	0.0	0.0	0.0	0.0	0.0	0.0	0.0	0.0	0.0	0.0	0.0	0.0	0.0	0.0	0.0	0.0	0.0	0.0	0.0	0.0
CAPZB	832	symbol	H. sapiens	832	H. sapiens	0.0	0.0	0.0	0.0	0.0	0.0	0.0	0.0	0.0	0.0	0.0	0.0	0.0	0.0	0.0	0.0	0.0	0.0	0.0	0.0
CARF	79800	symbol	H. sapiens	79800	H. sapiens	0.0	0.0	1.0	0.0	0.0	0.0	0.0	0.0	0.0	0.0	0.0	0.0	0.0	0.0	0.0	0.0	0.0	0.0	0.0	0.0
CASC10	399726	gene_synonym	H. sapiens	399726	H. sapiens	0.0	0.0	0.0	0.0	0.0	0.0	0.0	0.0	0.0	0.0	0.0	0.0	0.0	0.0	0.0	0.0	0.0	0.0	0.0	0.0
CASP10	843	symbol	H. sapiens	843	H. sapiens	0.0	0.0	0.0	0.0	0.0	0.0	0.0	0.0	0.0	1.0	0.0	0.0	0.0	0.0	0.0	0.0	0.0	0.0	0.0	0.0
CBLB	868	symbol	H. sapiens	868	H. sapiens	0.0	0.0	0.0	0.0	0.0	0.0	0.0	0.0	1.0	1.0	0.0	0.0	0.0	1.0	0.0	0.0	0.0	1.0	0.0	0.0
CBX3	11335	symbol	H. sapiens	11335	H. sapiens	0.0	0.0	1.0	1.0	0.0	0.0	0.0	1.0	0.0	0.0	0.0	1.0	0.0	0.0	0.0	0.0	0.0	0.0	0.0	0.0
CBX5	23468	symbol	H. sapiens	23468	H. sapiens	1.0	0.0	1.0	1.0	0.0	0.0	0.0	0.0	0.0	0.0	0.0	1.0	1.0	0.0	0.0	0.0	0.0	0.0	0.0	0.0
CBX7	23492	symbol	H. sapiens	23492	H. sapiens	0.0	0.0	0.0	1.0	0.0	0.0	0.0	0.0	0.0	0.0	0.0	0.0	1.0	0.0	0.0	0.0	0.0	0.0	0.0	0.0
CBY1	25776	symbol	H. sapiens	25776	H. sapiens	0.0	0.0	0.0	0.0	0.0	1.0	0.0	0.0	0.0	0.0	0.0	0.0	0.0	0.0	0.0	0.0	0.0	0.0	1.0	0.0
CCAR1	55749	symbol	H. sapiens	55749	H. sapiens	0.0	0.0	0.0	0.0	0.0	0.0	0.0	0.0	0.0	0.0	1.0	0.0	0.0	0.0	0.0	0.0	0.0	0.0	0.0	0.0
CCDC159	126075	symbol	H. sapiens	126075	H. sapiens	0.0	0.0	0.0	0.0	0.0	0.0	0.0	0.0	0.0	0.0	0.0	0.0	0.0	0.0	0.0	0.0	0.0	0.0	0.0	0.0
CCDC30	728621	symbol	H. sapiens	728621	H. sapiens	0.0	0.0	0.0	0.0	0.0	0.0	0.0	0.0	0.0	0.0	0.0	0.0	0.0	0.0	0.0	0.0	0.0	0.0	0.0	0.0
CCDC43	124808	symbol	H. sapiens	124808	H. sapiens	0.0	0.0	0.0	0.0	0.0	0.0	0.0	0.0	0.0	0.0	0.0	0.0	0.0	0.0	0.0	0.0	0.0	0.0	0.0	0.0
CCDC71L	168455	symbol	H. sapiens	168455	H. sapiens	0.0	0.0	0.0	0.0	0.0	0.0	0.0	0.0	0.0	0.0	0.0	0.0	0.0	0.0	0.0	0.0	0.0	0.0	0.0	0.0
CCDC9	26093	symbol	H. sapiens	26093	H. sapiens	0.0	0.0	0.0	0.0	0.0	0.0	0.0	0.0	0.0	0.0	0.0	0.0	0.0	0.0	0.0	0.0	0.0	0.0	0.0	0.0
CCDC94	55702	gene_synonym	H. sapiens	55702	H. sapiens	1.0	0.0	0.0	0.0	1.0	0.0	0.0	0.0	1.0	0.0	0.0	0.0	0.0	0.0	0.0	1.0	0.0	0.0	0.0	0.0
CCM2	83605	symbol	H. sapiens	83605	H. sapiens	0.0	0.0	0.0	0.0	0.0	0.0	0.0	0.0	0.0	0.0	0.0	0.0	0.0	0.0	0.0	0.0	0.0	0.0	0.0	0.0
CCNA2	890	symbol	H. sapiens	890	H. sapiens	0.0	0.0	0.0	0.0	0.0	0.0	1.0	0.0	1.0	0.0	0.0	0.0	1.0	0.0	0.0	0.0	1.0	1.0	0.0	0.0
CCS	9973	symbol	H. sapiens	9973	H. sapiens	0.0	0.0	0.0	0.0	0.0	0.0	0.0	0.0	0.0	0.0	0.0	0.0	0.0	0.0	0.0	0.0	0.0	0.0	0.0	0.0
CCT2	10576	symbol	H. sapiens	10576	H. sapiens	0.0	0.0	0.0	0.0	0.0	0.0	0.0	0.0	0.0	0.0	0.0	0.0	0.0	0.0	0.0	1.0	0.0	1.0	0.0	0.0
CD14	929	symbol	H. sapiens	929	H. sapiens	0.0	0.0	0.0	0.0	0.0	0.0	0.0	0.0	0.0	0.0	0.0	0.0	0.0	0.0	0.0	0.0	0.0	0.0	0.0	0.0
CD52	1043	symbol	H. sapiens	1043	H. sapiens	0.0	0.0	0.0	0.0	0.0	0.0	0.0	0.0	0.0	0.0	0.0	0.0	0.0	0.0	0.0	0.0	0.0	0.0	0.0	0.0
CD82	3732	symbol	H. sapiens	3732	H. sapiens	0.0	0.0	0.0	0.0	0.0	0.0	0.0	0.0	0.0	0.0	0.0	0.0	0.0	0.0	0.0	0.0	0.0	0.0	0.0	0.0
CDC34	997	symbol	H. sapiens	997	H. sapiens	0.0	0.0	0.0	0.0	0.0	1.0	0.0	0.0	1.0	0.0	0.0	1.0	0.0	1.0	0.0	0.0	1.0	0.0	0.0	0.0
CDK10	8558	symbol	H. sapiens	8558	H. sapiens	0.0	0.0	0.0	0.0	0.0	0.0	0.0	0.0	0.0	0.0	0.0	0.0	0.0	0.0	0.0	0.0	0.0	0.0	0.0	0.0
CDK11B	984	symbol	H. sapiens	984	H. sapiens	0.0	0.0	0.0	0.0	0.0	0.0	0.0	0.0	0.0	0.0	0.0	0.0	0.0	0.0	1.0	0.0	1.0	0.0	0.0	0.0
CDK4	1019	symbol	H. sapiens	1019	H. sapiens	0.0	0.0	1.0	0.0	0.0	0.0	0.0	0.0	0.0	0.0	0.0	0.0	1.0	0.0	0.0	0.0	1.0	0.0	0.0	0.0
CDK5RAP2	55755	symbol	H. sapiens	55755	H. sapiens	0.0	0.0	0.0	0.0	0.0	0.0	0.0	0.0	1.0	0.0	0.0	0.0	0.0	0.0	0.0	0.0	1.0	1.0	0.0	0.0
CDK5RAP3	80279	symbol	H. sapiens	80279	H. sapiens	0.0	0.0	1.0	0.0	0.0	0.0	0.0	0.0	1.0	1.0	0.0	1.0	0.0	1.0	0.0	0.0	1.0	1.0	0.0	0.0
CDK9	1025	symbol	H. sapiens	1025	H. sapiens	0.0	1.0	1.0	0.0	0.0	0.0	0.0	0.0	0.0	0.0	0.0	1.0	1.0	0.0	1.0	1.0	0.0	1.0	0.0	1.0
CDKN1B	1027	symbol	H. sapiens	1027	H. sapiens	0.0	0.0	0.0	0.0	0.0	0.0	0.0	0.0	1.0	1.0	0.0	1.0	1.0	0.0	0.0	0.0	1.0	1.0	0.0	0.0
CDKN2AIP	55602	symbol	H. sapiens	55602	H. sapiens	0.0	0.0	0.0	0.0	0.0	0.0	0.0	0.0	0.0	0.0	0.0	1.0	0.0	0.0	0.0	0.0	0.0	0.0	0.0	0.0
CDO1	1036	symbol	H. sapiens	1036	H. sapiens	0.0	0.0	0.0	0.0	0.0	0.0	0.0	0.0	0.0	0.0	0.0	0.0	0.0	0.0	0.0	0.0	0.0	0.0	0.0	0.0
CDON	50937	symbol	H. sapiens	50937	H. sapiens	0.0	0.0	0.0	0.0	0.0	0.0	0.0	0.0	0.0	0.0	0.0	0.0	0.0	0.0	0.0	0.0	0.0	0.0	0.0	0.0
CDV3	55573	symbol	H. sapiens	55573	H. sapiens	0.0	0.0	0.0	0.0	0.0	0.0	0.0	0.0	0.0	0.0	0.0	0.0	0.0	0.0	0.0	0.0	0.0	0.0	0.0	0.0
CEBPB	1051	symbol	H. sapiens	1051	H. sapiens	0.0	0.0	1.0	0.0	0.0	0.0	0.0	0.0	0.0	0.0	0.0	0.0	0.0	0.0	0.0	0.0	0.0	0.0	1.0	0.0
CEBPD	1052	symbol	H. sapiens	1052	H. sapiens	0.0	1.0	1.0	0.0	0.0	0.0	0.0	0.0	0.0	0.0	0.0	0.0	0.0	0.0	0.0	0.0	0.0	0.0	0.0	0.0
CECR5	27440	gene_synonym	H. sapiens	27440	H. sapiens	0.0	0.0	0.0	0.0	0.0	0.0	0.0	0.0	0.0	0.0	0.0	0.0	0.0	0.0	0.0	0.0	0.0	0.0	0.0	0.0
CENPF	1063	symbol	H. sapiens	1063	H. sapiens	0.0	1.0	1.0	0.0	0.0	0.0	0.0	0.0	0.0	0.0	0.0	1.0	0.0	0.0	0.0	0.0	1.0	0.0	1.0	0.0
CENPV	201161	symbol	H. sapiens	201161	H. sapiens	0.0	0.0	0.0	1.0	0.0	0.0	0.0	0.0	0.0	0.0	0.0	0.0	0.0	0.0	0.0	0.0	1.0	0.0	0.0	0.0
CEP112	201134	symbol	H. sapiens	201134	H. sapiens	0.0	0.0	0.0	0.0	0.0	0.0	0.0	0.0	0.0	0.0	0.0	0.0	0.0	0.0	0.0	0.0	0.0	0.0	0.0	0.0
CEP164	22897	symbol	H. sapiens	22897	H. sapiens	0.0	0.0	0.0	0.0	0.0	0.0	0.0	0.0	0.0	0.0	0.0	1.0	0.0	0.0	0.0	0.0	1.0	0.0	0.0	0.0
CEP192	55125	symbol	H. sapiens	55125	H. sapiens	0.0	0.0	0.0	0.0	0.0	0.0	0.0	0.0	0.0	0.0	0.0	0.0	0.0	0.0	0.0	0.0	1.0	0.0	0.0	0.0
CEP295	85459	symbol	H. sapiens	85459	H. sapiens	0.0	0.0	0.0	0.0	0.0	0.0	0.0	0.0	0.0	0.0	0.0	0.0	0.0	0.0	0.0	0.0	0.0	0.0	0.0	0.0
CFAP44	55779	symbol	H. sapiens	55779	H. sapiens	0.0	0.0	0.0	0.0	0.0	0.0	0.0	0.0	0.0	0.0	0.0	0.0	0.0	0.0	0.0	0.0	0.0	0.0	0.0	0.0
CFB	629	symbol	H. sapiens	629	H. sapiens	0.0	0.0	0.0	0.0	0.0	0.0	0.0	0.0	0.0	0.0	0.0	0.0	0.0	0.0	0.0	0.0	0.0	0.0	0.0	0.0
CFHR5	81494	symbol	H. sapiens	81494	H. sapiens	0.0	0.0	0.0	0.0	0.0	0.0	0.0	0.0	0.0	0.0	0.0	0.0	0.0	0.0	0.0	0.0	0.0	0.0	0.0	0.0
CFL2	1073	symbol	H. sapiens	1073	H. sapiens	0.0	0.0	0.0	0.0	0.0	0.0	0.0	0.0	0.0	0.0	0.0	0.0	0.0	0.0	0.0	0.0	0.0	0.0	0.0	0.0
CHD9	80205	symbol	H. sapiens	80205	H. sapiens	0.0	0.0	0.0	1.0	0.0	0.0	0.0	0.0	0.0	0.0	0.0	0.0	0.0	0.0	0.0	0.0	0.0	0.0	0.0	0.0
CHMP1B	57132	symbol	H. sapiens	57132	H. sapiens	0.0	0.0	0.0	0.0	0.0	0.0	0.0	0.0	0.0	0.0	0.0	0.0	0.0	1.0	0.0	0.0	1.0	0.0	0.0	0.0
CHMP2A	27243	symbol	H. sapiens	27243	H. sapiens	0.0	0.0	0.0	0.0	0.0	0.0	0.0	0.0	0.0	0.0	0.0	0.0	0.0	1.0	0.0	0.0	1.0	0.0	0.0	0.0
CHMP6	79643	symbol	H. sapiens	79643	H. sapiens	0.0	0.0	0.0	0.0	0.0	0.0	0.0	0.0	1.0	1.0	0.0	0.0	0.0	1.0	0.0	0.0	1.0	1.0	0.0	0.0
CHTF8	54921	symbol	H. sapiens	54921	H. sapiens	0.0	0.0	0.0	0.0	0.0	0.0	0.0	0.0	0.0	0.0	0.0	0.0	0.0	0.0	0.0	1.0	1.0	1.0	0.0	0.0
CIITA	4261	symbol	H. sapiens	4261	H. sapiens	0.0	0.0	1.0	0.0	0.0	0.0	0.0	0.0	0.0	0.0	1.0	0.0	0.0	0.0	0.0	0.0	0.0	0.0	0.0	0.0
CITED4	163732	symbol	H. sapiens	163732	H. sapiens	0.0	0.0	0.0	0.0	0.0	0.0	0.0	0.0	0.0	0.0	1.0	0.0	0.0	0.0	0.0	0.0	0.0	0.0	0.0	0.0
CLASP2	23122	symbol	H. sapiens	23122	H. sapiens	0.0	0.0	0.0	0.0	0.0	0.0	0.0	0.0	0.0	0.0	0.0	0.0	0.0	0.0	0.0	0.0	1.0	0.0	0.0	0.0
CLCN4	1183	symbol	H. sapiens	1183	H. sapiens	0.0	0.0	0.0	0.0	0.0	0.0	0.0	0.0	0.0	0.0	0.0	0.0	0.0	0.0	0.0	0.0	0.0	0.0	0.0	0.0
CLDN12	9069	symbol	H. sapiens	9069	H. sapiens	0.0	0.0	0.0	0.0	0.0	0.0	0.0	0.0	0.0	0.0	0.0	0.0	0.0	0.0	0.0	0.0	0.0	0.0	0.0	0.0
CLEC16A	23274	symbol	H. sapiens	23274	H. sapiens	0.0	0.0	0.0	0.0	0.0	0.0	0.0	0.0	0.0	0.0	0.0	0.0	0.0	0.0	0.0	0.0	0.0	0.0	0.0	0.0
CLP1	10978	symbol	H. sapiens	10978	H. sapiens	1.0	0.0	0.0	0.0	1.0	0.0	0.0	0.0	0.0	0.0	0.0	0.0	0.0	0.0	0.0	0.0	0.0	0.0	0.0	0.0
CLPP	8192	symbol	H. sapiens	8192	H. sapiens	0.0	0.0	0.0	0.0	0.0	0.0	0.0	1.0	0.0	0.0	0.0	0.0	0.0	1.0	0.0	0.0	0.0	0.0	0.0	0.0
CLPX	10845	symbol	H. sapiens	10845	H. sapiens	0.0	0.0	0.0	0.0	0.0	0.0	0.0	1.0	0.0	1.0	0.0	0.0	0.0	1.0	0.0	0.0	0.0	0.0	0.0	0.0
CMTM6	54918	symbol	H. sapiens	54918	H. sapiens	0.0	0.0	0.0	0.0	0.0	0.0	0.0	0.0	0.0	0.0	0.0	0.0	0.0	0.0	0.0	0.0	0.0	0.0	0.0	0.0
CNBP	7555	symbol	H. sapiens	7555	H. sapiens	0.0	0.0	0.0	0.0	0.0	0.0	0.0	0.0	0.0	0.0	0.0	1.0	0.0	0.0	1.0	0.0	0.0	0.0	0.0	0.0
CNN3	1266	symbol	H. sapiens	1266	H. sapiens	0.0	0.0	0.0	0.0	0.0	0.0	0.0	0.0	0.0	0.0	0.0	0.0	0.0	0.0	0.0	0.0	0.0	0.0	0.0	0.0
CNOT8	9337	symbol	H. sapiens	9337	H. sapiens	1.0	1.0	0.0	0.0	0.0	0.0	0.0	0.0	0.0	1.0	0.0	0.0	1.0	0.0	1.0	0.0	0.0	0.0	0.0	0.0
CNPY3	10695	symbol	H. sapiens	10695	H. sapiens	0.0	0.0	0.0	0.0	0.0	0.0	0.0	0.0	0.0	0.0	0.0	0.0	0.0	0.0	0.0	0.0	0.0	0.0	0.0	0.0
COA3	28958	symbol	H. sapiens	28958	H. sapiens	0.0	0.0	0.0	0.0	0.0	0.0	0.0	1.0	0.0	0.0	0.0	0.0	0.0	0.0	1.0	0.0	0.0	0.0	0.0	0.0
COA6	388753	symbol	H. sapiens	388753	H. sapiens	0.0	0.0	0.0	0.0	0.0	0.0	0.0	1.0	0.0	0.0	0.0	0.0	0.0	0.0	0.0	0.0	0.0	0.0	0.0	0.0
COPS6	10980	symbol	H. sapiens	10980	H. sapiens	0.0	0.0	0.0	0.0	0.0	0.0	0.0	0.0	0.0	0.0	0.0	0.0	0.0	0.0	0.0	0.0	0.0	0.0	0.0	0.0
COQ10B	80219	symbol	H. sapiens	80219	H. sapiens	0.0	0.0	0.0	0.0	0.0	0.0	0.0	1.0	0.0	0.0	0.0	0.0	0.0	0.0	0.0	0.0	0.0	0.0	0.0	0.0
COQ5	84274	symbol	H. sapiens	84274	H. sapiens	0.0	0.0	0.0	0.0	0.0	0.0	1.0	1.0	0.0	0.0	0.0	0.0	0.0	0.0	0.0	0.0	0.0	0.0	0.0	0.0
COQ7	10229	symbol	H. sapiens	10229	H. sapiens	0.0	0.0	0.0	0.0	0.0	0.0	0.0	1.0	0.0	0.0	0.0	0.0	0.0	0.0	0.0	0.0	0.0	0.0	0.0	0.0
COQ8A	56997	symbol	H. sapiens	56997	H. sapiens	0.0	0.0	0.0	0.0	0.0	0.0	0.0	1.0	0.0	0.0	0.0	0.0	0.0	0.0	0.0	0.0	0.0	0.0	0.0	0.0
COQ9	57017	symbol	H. sapiens	57017	H. sapiens	0.0	0.0	0.0	0.0	0.0	0.0	0.0	1.0	0.0	0.0	0.0	0.0	0.0	0.0	0.0	0.0	0.0	0.0	1.0	0.0
COX14	84987	symbol	H. sapiens	84987	H. sapiens	0.0	0.0	0.0	0.0	0.0	0.0	0.0	1.0	0.0	0.0	0.0	0.0	0.0	0.0	0.0	0.0	0.0	0.0	0.0	0.0
COX5B	1329	symbol	H. sapiens	1329	H. sapiens	0.0	0.0	0.0	0.0	0.0	0.0	0.0	1.0	0.0	0.0	0.0	0.0	0.0	0.0	0.0	0.0	0.0	0.0	0.0	0.0
COX7A2	1347	symbol	H. sapiens	1347	H. sapiens	0.0	0.0	0.0	0.0	0.0	0.0	0.0	1.0	0.0	0.0	0.0	0.0	0.0	0.0	0.0	0.0	0.0	0.0	0.0	0.0
COX8A	1351	symbol	H. sapiens	1351	H. sapiens	0.0	0.0	0.0	0.0	0.0	0.0	0.0	1.0	0.0	0.0	0.0	0.0	0.0	0.0	0.0	0.0	0.0	0.0	0.0	0.0
CPD	1362	symbol	H. sapiens	1362	H. sapiens	0.0	0.0	0.0	0.0	0.0	0.0	0.0	0.0	0.0	0.0	0.0	0.0	0.0	0.0	0.0	0.0	0.0	0.0	0.0	0.0
CPEB3	22849	symbol	H. sapiens	22849	H. sapiens	1.0	0.0	0.0	0.0	0.0	0.0	0.0	0.0	0.0	1.0	0.0	0.0	1.0	0.0	1.0	0.0	0.0	0.0	0.0	0.0
CPN1	1369	symbol	H. sapiens	1369	H. sapiens	0.0	0.0	0.0	0.0	0.0	0.0	0.0	0.0	0.0	0.0	0.0	0.0	0.0	0.0	0.0	0.0	0.0	0.0	0.0	0.0
CPOX	1371	symbol	H. sapiens	1371	H. sapiens	0.0	1.0	0.0	0.0	0.0	0.0	0.0	1.0	0.0	0.0	0.0	0.0	0.0	0.0	0.0	0.0	0.0	0.0	1.0	0.0
CPSF3L	54973	gene_synonym	H. sapiens	54973	H. sapiens	0.0	0.0	0.0	0.0	1.0	0.0	0.0	0.0	0.0	0.0	0.0	0.0	0.0	0.0	0.0	0.0	0.0	0.0	0.0	0.0
CPSF4	10898	symbol	H. sapiens	10898	H. sapiens	1.0	0.0	0.0	0.0	0.0	0.0	0.0	0.0	0.0	0.0	0.0	0.0	0.0	0.0	0.0	0.0	0.0	0.0	0.0	0.0
CPTP	80772	symbol	H. sapiens	80772	H. sapiens	0.0	0.0	0.0	0.0	0.0	0.0	0.0	0.0	0.0	0.0	0.0	0.0	0.0	0.0	0.0	0.0	0.0	0.0	0.0	0.0
CREBL2	1389	symbol	H. sapiens	1389	H. sapiens	0.0	1.0	0.0	0.0	0.0	0.0	0.0	0.0	0.0	0.0	0.0	0.0	0.0	0.0	0.0	0.0	0.0	1.0	0.0	0.0
CRNKL1	51340	symbol	H. sapiens	51340	H. sapiens	1.0	0.0	0.0	0.0	1.0	1.0	0.0	0.0	0.0	0.0	0.0	0.0	0.0	0.0	0.0	0.0	0.0	0.0	0.0	0.0
CSNK2B	1460	symbol	H. sapiens	1460	H. sapiens	0.0	0.0	1.0	0.0	0.0	0.0	0.0	0.0	0.0	0.0	0.0	0.0	1.0	0.0	0.0	0.0	0.0	1.0	0.0	0.0
CSPG4P5	114817	symbol	H. sapiens	114817	H. sapiens	0.0	0.0	0.0	0.0	0.0	0.0	0.0	0.0	0.0	0.0	0.0	0.0	0.0	0.0	0.0	0.0	0.0	0.0	0.0	0.0
CSTF2	1478	symbol	H. sapiens	1478	H. sapiens	1.0	0.0	0.0	0.0	0.0	0.0	0.0	0.0	0.0	0.0	0.0	0.0	0.0	0.0	0.0	0.0	0.0	0.0	0.0	0.0
CSTF3	1479	symbol	H. sapiens	1479	H. sapiens	1.0	0.0	0.0	0.0	0.0	0.0	0.0	0.0	0.0	0.0	0.0	0.0	0.0	0.0	0.0	0.0	0.0	0.0	0.0	0.0
CTDSP2	10106	symbol	H. sapiens	10106	H. sapiens	0.0	0.0	0.0	0.0	0.0	0.0	0.0	0.0	1.0	0.0	0.0	0.0	0.0	0.0	0.0	0.0	0.0	0.0	0.0	0.0
CTR9	9646	symbol	H. sapiens	9646	H. sapiens	0.0	1.0	0.0	0.0	0.0	1.0	1.0	0.0	0.0	0.0	0.0	0.0	1.0	1.0	1.0	0.0	0.0	0.0	0.0	1.0
CTSF	8722	symbol	H. sapiens	8722	H. sapiens	0.0	0.0	0.0	0.0	0.0	0.0	0.0	0.0	0.0	0.0	0.0	0.0	0.0	1.0	0.0	0.0	0.0	0.0	0.0	0.0
CTSK	1513	symbol	H. sapiens	1513	H. sapiens	0.0	0.0	0.0	0.0	0.0	0.0	0.0	0.0	0.0	0.0	0.0	0.0	0.0	1.0	0.0	0.0	0.0	0.0	0.0	0.0
CTSL	1514	symbol	H. sapiens	1514	H. sapiens	0.0	0.0	0.0	0.0	0.0	0.0	0.0	0.0	0.0	0.0	0.0	0.0	0.0	1.0	0.0	0.0	0.0	0.0	0.0	0.0
CTTN	2017	symbol	H. sapiens	2017	H. sapiens	0.0	0.0	0.0	0.0	0.0	0.0	0.0	0.0	0.0	0.0	0.0	0.0	0.0	0.0	0.0	0.0	0.0	0.0	0.0	0.0
CUEDC2	79004	symbol	H. sapiens	79004	H. sapiens	0.0	0.0	0.0	0.0	0.0	0.0	0.0	0.0	0.0	0.0	0.0	0.0	0.0	0.0	0.0	0.0	0.0	0.0	0.0	0.0
CXCL2	2920	symbol	H. sapiens	2920	H. sapiens	0.0	0.0	0.0	0.0	0.0	0.0	0.0	0.0	0.0	0.0	0.0	0.0	0.0	0.0	0.0	0.0	0.0	0.0	0.0	0.0
CXorf40B	541578	gene_synonym	H. sapiens	541578	H. sapiens	0.0	0.0	0.0	0.0	0.0	0.0	0.0	0.0	0.0	0.0	0.0	0.0	0.0	0.0	0.0	0.0	0.0	0.0	0.0	0.0
CXorf56	63932	gene_synonym	H. sapiens	63932	H. sapiens	0.0	0.0	0.0	0.0	0.0	0.0	0.0	0.0	0.0	0.0	0.0	0.0	0.0	0.0	0.0	0.0	0.0	0.0	0.0	0.0
CYB5D2	124936	symbol	H. sapiens	124936	H. sapiens	0.0	0.0	0.0	0.0	0.0	0.0	0.0	0.0	0.0	0.0	0.0	0.0	0.0	0.0	0.0	0.0	0.0	0.0	0.0	0.0
CYC1	1537	symbol	H. sapiens	1537	H. sapiens	0.0	0.0	0.0	0.0	0.0	0.0	0.0	1.0	0.0	0.0	0.0	0.0	0.0	0.0	0.0	0.0	0.0	0.0	0.0	0.0
CYP26A1	1592	symbol	H. sapiens	1592	H. sapiens	0.0	0.0	0.0	0.0	0.0	0.0	0.0	0.0	0.0	0.0	0.0	0.0	0.0	0.0	0.0	0.0	0.0	0.0	0.0	0.0
CYP27A1	1593	symbol	H. sapiens	1593	H. sapiens	0.0	0.0	0.0	0.0	0.0	0.0	0.0	1.0	0.0	0.0	0.0	0.0	0.0	0.0	0.0	0.0	0.0	0.0	0.0	0.0
CYP2B7P	1556	symbol	H. sapiens	1556	H. sapiens	0.0	0.0	0.0	0.0	0.0	0.0	0.0	0.0	0.0	0.0	0.0	0.0	0.0	0.0	0.0	0.0	0.0	0.0	0.0	0.0
CYP2R1	120227	symbol	H. sapiens	120227	H. sapiens	0.0	0.0	0.0	0.0	0.0	0.0	0.0	0.0	0.0	0.0	0.0	0.0	0.0	0.0	0.0	0.0	0.0	0.0	1.0	0.0
CYP7A1	1581	symbol	H. sapiens	1581	H. sapiens	0.0	0.0	0.0	0.0	0.0	0.0	0.0	0.0	0.0	0.0	0.0	0.0	0.0	0.0	0.0	0.0	0.0	0.0	0.0	0.0
CYP7B1	9420	symbol	H. sapiens	9420	H. sapiens	0.0	0.0	0.0	0.0	0.0	0.0	0.0	0.0	0.0	0.0	0.0	0.0	0.0	0.0	0.0	0.0	0.0	0.0	0.0	0.0
CYR61	3491	gene_synonym	H. sapiens	3491	H. sapiens	0.0	0.0	0.0	0.0	0.0	0.0	0.0	0.0	0.0	1.0	0.0	0.0	0.0	0.0	1.0	0.0	0.0	1.0	0.0	0.0
DCAF16	54876	symbol	H. sapiens	54876	H. sapiens	0.0	0.0	0.0	0.0	0.0	0.0	0.0	0.0	0.0	0.0	0.0	0.0	1.0	1.0	0.0	0.0	0.0	0.0	0.0	0.0
DCUN1D3	123879	symbol	H. sapiens	123879	H. sapiens	0.0	0.0	0.0	0.0	0.0	0.0	0.0	0.0	1.0	0.0	0.0	0.0	1.0	1.0	0.0	0.0	0.0	1.0	0.0	0.0
DDX1	1653	symbol	H. sapiens	1653	H. sapiens	1.0	0.0	0.0	0.0	1.0	0.0	0.0	0.0	0.0	0.0	1.0	1.0	1.0	0.0	1.0	0.0	0.0	0.0	0.0	0.0
DDX18	8886	symbol	H. sapiens	8886	H. sapiens	0.0	0.0	0.0	0.0	1.0	0.0	0.0	0.0	0.0	0.0	0.0	0.0	0.0	0.0	0.0	0.0	0.0	0.0	0.0	0.0
DDX19B	11269	symbol	H. sapiens	11269	H. sapiens	0.0	0.0	0.0	0.0	0.0	0.0	0.0	0.0	0.0	0.0	0.0	0.0	0.0	0.0	1.0	0.0	0.0	0.0	0.0	0.0
DDX20	11218	symbol	H. sapiens	11218	H. sapiens	1.0	0.0	1.0	0.0	1.0	0.0	0.0	0.0	0.0	0.0	0.0	0.0	0.0	0.0	0.0	0.0	0.0	0.0	0.0	0.0
DDX23	9416	symbol	H. sapiens	9416	H. sapiens	1.0	0.0	0.0	0.0	1.0	0.0	0.0	0.0	0.0	0.0	0.0	1.0	0.0	0.0	0.0	0.0	0.0	0.0	0.0	0.0
DDX24	57062	symbol	H. sapiens	57062	H. sapiens	0.0	0.0	0.0	0.0	0.0	0.0	0.0	0.0	0.0	0.0	0.0	0.0	0.0	0.0	0.0	0.0	0.0	0.0	0.0	0.0
DDX27	55661	symbol	H. sapiens	55661	H. sapiens	0.0	0.0	0.0	0.0	1.0	0.0	0.0	0.0	0.0	0.0	0.0	0.0	0.0	0.0	0.0	0.0	0.0	0.0	0.0	0.0
DDX42	11325	symbol	H. sapiens	11325	H. sapiens	0.0	0.0	0.0	0.0	0.0	1.0	0.0	0.0	0.0	0.0	0.0	0.0	0.0	0.0	0.0	0.0	0.0	0.0	0.0	0.0
DEDD2	162989	symbol	H. sapiens	162989	H. sapiens	0.0	0.0	0.0	0.0	1.0	0.0	0.0	0.0	0.0	0.0	0.0	0.0	0.0	0.0	0.0	0.0	0.0	0.0	0.0	0.0
DEK	7913	symbol	H. sapiens	7913	H. sapiens	0.0	1.0	0.0	0.0	0.0	0.0	0.0	0.0	0.0	0.0	0.0	0.0	0.0	0.0	0.0	1.0	0.0	0.0	0.0	0.0
DENND2D	79961	symbol	H. sapiens	79961	H. sapiens	0.0	0.0	0.0	0.0	0.0	0.0	0.0	0.0	0.0	0.0	0.0	0.0	0.0	0.0	0.0	0.0	0.0	0.0	0.0	0.0
DEPDC7	91614	symbol	H. sapiens	91614	H. sapiens	0.0	0.0	0.0	0.0	0.0	0.0	0.0	0.0	0.0	0.0	0.0	0.0	0.0	0.0	0.0	0.0	0.0	0.0	0.0	0.0
DET1	55070	symbol	H. sapiens	55070	H. sapiens	0.0	0.0	0.0	0.0	0.0	0.0	0.0	0.0	0.0	1.0	0.0	0.0	1.0	1.0	0.0	0.0	0.0	0.0	0.0	0.0
DGCR14	8220	gene_synonym	H. sapiens	8220	H. sapiens	1.0	0.0	0.0	0.0	0.0	0.0	0.0	0.0	0.0	0.0	0.0	0.0	0.0	0.0	0.0	0.0	0.0	0.0	0.0	0.0
DHODH	1723	symbol	H. sapiens	1723	H. sapiens	0.0	1.0	0.0	0.0	0.0	0.0	0.0	1.0	0.0	0.0	0.0	0.0	0.0	0.0	0.0	0.0	0.0	0.0	0.0	0.0
DHPS	1725	symbol	H. sapiens	1725	H. sapiens	0.0	0.0	0.0	0.0	0.0	0.0	1.0	0.0	0.0	0.0	0.0	0.0	0.0	0.0	0.0	0.0	0.0	0.0	0.0	0.0
DHX9	1660	symbol	H. sapiens	1660	H. sapiens	1.0	1.0	1.0	0.0	1.0	0.0	0.0	0.0	0.0	0.0	1.0	0.0	0.0	0.0	1.0	1.0	0.0	0.0	0.0	0.0
DIABLO	56616	symbol	H. sapiens	56616	H. sapiens	0.0	0.0	0.0	0.0	0.0	0.0	0.0	1.0	0.0	1.0	0.0	0.0	0.0	0.0	0.0	0.0	0.0	0.0	0.0	0.0
DIP2A	23181	symbol	H. sapiens	23181	H. sapiens	0.0	1.0	0.0	0.0	0.0	0.0	0.0	0.0	0.0	0.0	0.0	0.0	0.0	0.0	0.0	0.0	0.0	0.0	0.0	0.0
DIRAS3	9077	symbol	H. sapiens	9077	H. sapiens	0.0	0.0	0.0	1.0	0.0	0.0	0.0	0.0	1.0	0.0	0.0	0.0	0.0	0.0	0.0	0.0	0.0	1.0	0.0	0.0
DLEU2	8847	symbol	H. sapiens	8847	H. sapiens	0.0	0.0	0.0	0.0	0.0	0.0	0.0	0.0	0.0	0.0	0.0	0.0	0.0	0.0	0.0	0.0	0.0	0.0	0.0	0.0
DLST	1743	symbol	H. sapiens	1743	H. sapiens	0.0	0.0	0.0	0.0	0.0	0.0	0.0	1.0	0.0	0.0	0.0	0.0	1.0	0.0	0.0	0.0	0.0	0.0	0.0	0.0
DMTF1	9988	symbol	H. sapiens	9988	H. sapiens	0.0	0.0	0.0	0.0	0.0	0.0	0.0	0.0	0.0	0.0	0.0	0.0	0.0	0.0	0.0	0.0	0.0	0.0	0.0	0.0
DNA2	1763	symbol	H. sapiens	1763	H. sapiens	0.0	0.0	0.0	0.0	0.0	0.0	0.0	1.0	0.0	0.0	0.0	1.0	0.0	0.0	0.0	0.0	1.0	0.0	0.0	0.0
DNAJC11	55735	symbol	H. sapiens	55735	H. sapiens	0.0	0.0	0.0	0.0	0.0	1.0	0.0	1.0	0.0	0.0	0.0	0.0	0.0	0.0	0.0	0.0	0.0	0.0	0.0	0.0
DNAJC12	56521	symbol	H. sapiens	56521	H. sapiens	0.0	0.0	0.0	0.0	0.0	0.0	0.0	0.0	0.0	0.0	0.0	0.0	0.0	0.0	0.0	0.0	0.0	0.0	0.0	0.0
DNAJC17	55192	symbol	H. sapiens	55192	H. sapiens	0.0	0.0	0.0	0.0	0.0	0.0	0.0	0.0	0.0	0.0	0.0	0.0	0.0	0.0	0.0	0.0	0.0	0.0	0.0	0.0
DNTTIP1	116092	symbol	H. sapiens	116092	H. sapiens	0.0	0.0	0.0	0.0	0.0	0.0	0.0	0.0	0.0	0.0	0.0	0.0	0.0	0.0	0.0	0.0	0.0	0.0	1.0	0.0
DOCK1	1793	symbol	H. sapiens	1793	H. sapiens	0.0	0.0	0.0	0.0	0.0	1.0	0.0	0.0	0.0	0.0	0.0	0.0	1.0	0.0	0.0	0.0	0.0	0.0	0.0	0.0
DOCK5	80005	symbol	H. sapiens	80005	H. sapiens	0.0	0.0	0.0	0.0	0.0	0.0	0.0	0.0	0.0	0.0	0.0	0.0	0.0	0.0	0.0	0.0	0.0	0.0	0.0	0.0
DOLK	22845	symbol	H. sapiens	22845	H. sapiens	0.0	0.0	0.0	0.0	0.0	0.0	0.0	0.0	0.0	0.0	0.0	0.0	0.0	0.0	0.0	0.0	0.0	0.0	0.0	0.0
DRG2	1819	symbol	H. sapiens	1819	H. sapiens	0.0	0.0	0.0	0.0	0.0	0.0	0.0	0.0	0.0	0.0	0.0	0.0	0.0	0.0	0.0	0.0	0.0	0.0	0.0	0.0
DTL	51514	symbol	H. sapiens	51514	H. sapiens	0.0	1.0	0.0	0.0	0.0	0.0	0.0	0.0	0.0	1.0	0.0	1.0	1.0	1.0	0.0	0.0	1.0	0.0	0.0	0.0
DTNB	1838	symbol	H. sapiens	1838	H. sapiens	0.0	0.0	0.0	0.0	0.0	0.0	0.0	0.0	0.0	0.0	0.0	0.0	0.0	0.0	0.0	0.0	0.0	0.0	0.0	0.0
DTX1	1840	symbol	H. sapiens	1840	H. sapiens	0.0	1.0	0.0	0.0	0.0	0.0	0.0	0.0	0.0	0.0	1.0	0.0	0.0	1.0	0.0	0.0	0.0	0.0	0.0	0.0
DUS2	54920	symbol	H. sapiens	54920	H. sapiens	0.0	0.0	0.0	0.0	1.0	0.0	0.0	0.0	1.0	0.0	0.0	0.0	0.0	0.0	0.0	0.0	0.0	0.0	0.0	0.0
DUSP10	11221	symbol	H. sapiens	11221	H. sapiens	0.0	0.0	0.0	0.0	0.0	1.0	0.0	0.0	1.0	0.0	0.0	0.0	0.0	0.0	0.0	1.0	0.0	1.0	0.0	0.0
DUSP14	11072	symbol	H. sapiens	11072	H. sapiens	0.0	0.0	0.0	0.0	0.0	0.0	0.0	0.0	0.0	0.0	0.0	0.0	0.0	0.0	0.0	0.0	0.0	0.0	0.0	0.0
DUSP16	80824	symbol	H. sapiens	80824	H. sapiens	0.0	0.0	0.0	0.0	0.0	0.0	0.0	0.0	1.0	0.0	0.0	0.0	0.0	0.0	0.0	1.0	0.0	1.0	0.0	0.0
DUSP5	1847	symbol	H. sapiens	1847	H. sapiens	0.0	0.0	0.0	0.0	0.0	0.0	0.0	0.0	1.0	0.0	0.0	0.0	0.0	0.0	0.0	0.0	0.0	0.0	0.0	0.0
DUSP6	1848	symbol	H. sapiens	1848	H. sapiens	0.0	0.0	0.0	0.0	0.0	0.0	0.0	0.0	1.0	0.0	0.0	0.0	0.0	0.0	0.0	0.0	0.0	0.0	0.0	0.0
DXO	1797	symbol	H. sapiens	1797	H. sapiens	1.0	0.0	0.0	0.0	0.0	0.0	0.0	0.0	0.0	1.0	0.0	0.0	0.0	0.0	1.0	0.0	0.0	0.0	0.0	0.0
DZIP1	22873	symbol	H. sapiens	22873	H. sapiens	0.0	0.0	0.0	0.0	0.0	1.0	0.0	0.0	0.0	0.0	0.0	0.0	0.0	0.0	0.0	0.0	0.0	0.0	0.0	0.0
EAF2	55840	symbol	H. sapiens	55840	H. sapiens	0.0	0.0	0.0	0.0	0.0	1.0	0.0	0.0	0.0	0.0	0.0	0.0	0.0	0.0	0.0	0.0	0.0	0.0	0.0	0.0
ECE1	1889	symbol	H. sapiens	1889	H. sapiens	0.0	0.0	0.0	0.0	0.0	0.0	0.0	0.0	0.0	0.0	0.0	0.0	0.0	0.0	0.0	0.0	0.0	0.0	1.0	0.0
ECHDC3	79746	symbol	H. sapiens	79746	H. sapiens	0.0	0.0	0.0	0.0	0.0	0.0	0.0	0.0	0.0	0.0	0.0	0.0	0.0	0.0	0.0	0.0	0.0	0.0	0.0	0.0
ECI2	10455	symbol	H. sapiens	10455	H. sapiens	0.0	0.0	0.0	0.0	0.0	0.0	0.0	0.0	0.0	0.0	0.0	0.0	0.0	0.0	0.0	0.0	0.0	0.0	0.0	0.0
EDEM2	55741	symbol	H. sapiens	55741	H. sapiens	0.0	0.0	0.0	0.0	0.0	0.0	0.0	0.0	0.0	0.0	0.0	0.0	0.0	1.0	0.0	0.0	0.0	0.0	0.0	0.0
EDN1	1906	symbol	H. sapiens	1906	H. sapiens	0.0	1.0	0.0	0.0	0.0	0.0	0.0	0.0	1.0	0.0	0.0	0.0	0.0	0.0	0.0	0.0	0.0	1.0	0.0	0.0
EEF1D	1936	symbol	H. sapiens	1936	H. sapiens	0.0	0.0	0.0	0.0	0.0	0.0	0.0	0.0	0.0	0.0	0.0	0.0	0.0	0.0	0.0	0.0	0.0	0.0	0.0	0.0
EFCAB11	90141	symbol	H. sapiens	90141	H. sapiens	0.0	0.0	0.0	0.0	0.0	0.0	0.0	0.0	0.0	0.0	0.0	0.0	0.0	0.0	0.0	0.0	0.0	0.0	0.0	0.0
EGLN1	54583	symbol	H. sapiens	54583	H. sapiens	0.0	0.0	0.0	0.0	0.0	0.0	0.0	0.0	1.0	0.0	0.0	0.0	0.0	0.0	0.0	0.0	0.0	0.0	0.0	0.0
EGR1	1958	symbol	H. sapiens	1958	H. sapiens	0.0	0.0	1.0	0.0	0.0	0.0	0.0	0.0	0.0	0.0	0.0	0.0	0.0	0.0	0.0	0.0	0.0	1.0	0.0	0.0
EGR3	1960	symbol	H. sapiens	1960	H. sapiens	0.0	0.0	1.0	0.0	0.0	0.0	0.0	0.0	0.0	0.0	0.0	0.0	0.0	0.0	0.0	0.0	0.0	0.0	0.0	0.0
EID1	23741	symbol	H. sapiens	23741	H. sapiens	0.0	0.0	0.0	0.0	0.0	0.0	0.0	0.0	0.0	0.0	1.0	0.0	0.0	0.0	1.0	0.0	0.0	0.0	0.0	1.0
EIF2B2	8892	symbol	H. sapiens	8892	H. sapiens	0.0	0.0	0.0	0.0	0.0	0.0	0.0	0.0	0.0	0.0	0.0	0.0	0.0	0.0	1.0	0.0	0.0	0.0	0.0	0.0
EIF3B	8662	symbol	H. sapiens	8662	H. sapiens	1.0	0.0	0.0	0.0	0.0	0.0	0.0	0.0	0.0	0.0	0.0	0.0	0.0	0.0	1.0	0.0	0.0	0.0	0.0	0.0
EIF3D	8664	symbol	H. sapiens	8664	H. sapiens	1.0	0.0	0.0	0.0	0.0	0.0	0.0	0.0	0.0	0.0	0.0	0.0	0.0	0.0	1.0	0.0	0.0	0.0	0.0	0.0
EIF3G	8666	symbol	H. sapiens	8666	H. sapiens	1.0	0.0	0.0	0.0	0.0	0.0	0.0	0.0	0.0	0.0	0.0	0.0	0.0	0.0	0.0	0.0	0.0	0.0	0.0	0.0
EIF3I	8668	symbol	H. sapiens	8668	H. sapiens	1.0	0.0	0.0	0.0	0.0	0.0	0.0	0.0	0.0	0.0	0.0	0.0	0.0	0.0	0.0	0.0	0.0	0.0	0.0	0.0
EIF3L	51386	symbol	H. sapiens	51386	H. sapiens	1.0	0.0	0.0	0.0	0.0	0.0	0.0	0.0	0.0	0.0	0.0	0.0	0.0	0.0	0.0	0.0	0.0	0.0	0.0	0.0
EIF4B	1975	symbol	H. sapiens	1975	H. sapiens	1.0	0.0	0.0	0.0	1.0	0.0	0.0	0.0	0.0	0.0	0.0	0.0	0.0	0.0	1.0	0.0	0.0	0.0	0.0	0.0
EIF4G3	8672	symbol	H. sapiens	8672	H. sapiens	0.0	0.0	0.0	0.0	0.0	0.0	0.0	0.0	0.0	0.0	0.0	0.0	0.0	0.0	1.0	0.0	0.0	0.0	0.0	0.0
EIF4H	7458	symbol	H. sapiens	7458	H. sapiens	1.0	0.0	0.0	0.0	1.0	0.0	0.0	0.0	0.0	0.0	0.0	0.0	0.0	0.0	1.0	0.0	0.0	0.0	0.0	0.0
EMC10	284361	symbol	H. sapiens	284361	H. sapiens	0.0	0.0	0.0	0.0	0.0	0.0	0.0	0.0	0.0	0.0	0.0	0.0	0.0	0.0	0.0	1.0	0.0	0.0	0.0	0.0
ENSA	2029	symbol	H. sapiens	2029	H. sapiens	0.0	0.0	0.0	0.0	0.0	0.0	0.0	0.0	1.0	0.0	0.0	0.0	0.0	0.0	0.0	0.0	1.0	0.0	0.0	0.0
ENTPD6	955	symbol	H. sapiens	955	H. sapiens	0.0	0.0	0.0	0.0	0.0	0.0	0.0	0.0	0.0	0.0	0.0	0.0	0.0	0.0	0.0	0.0	0.0	0.0	0.0	0.0
EP300	2033	symbol	H. sapiens	2033	H. sapiens	0.0	0.0	1.0	1.0	0.0	0.0	1.0	0.0	0.0	0.0	1.0	1.0	1.0	0.0	0.0	1.0	0.0	0.0	0.0	0.0
EP400NL	347918	gene_synonym	H. sapiens	347918	H. sapiens	0.0	0.0	0.0	0.0	0.0	0.0	0.0	0.0	0.0	0.0	0.0	0.0	0.0	0.0	0.0	0.0	0.0	0.0	0.0	0.0
EPAS1	2034	symbol	H. sapiens	2034	H. sapiens	1.0	1.0	1.0	0.0	0.0	1.0	0.0	0.0	0.0	0.0	0.0	0.0	0.0	0.0	0.0	0.0	0.0	0.0	0.0	0.0
EPHA2	1969	symbol	H. sapiens	1969	H. sapiens	0.0	0.0	0.0	0.0	0.0	0.0	0.0	0.0	1.0	0.0	0.0	1.0	0.0	0.0	0.0	0.0	0.0	1.0	0.0	0.0
EPS15L1	58513	symbol	H. sapiens	58513	H. sapiens	0.0	0.0	0.0	0.0	0.0	0.0	0.0	0.0	0.0	0.0	0.0	0.0	0.0	0.0	0.0	0.0	0.0	0.0	0.0	0.0
EPT1	85465	gene_synonym	H. sapiens	85465	H. sapiens	0.0	0.0	0.0	0.0	0.0	0.0	0.0	0.0	0.0	0.0	0.0	0.0	0.0	0.0	0.0	0.0	0.0	0.0	0.0	0.0
ERICH1	157697	symbol	H. sapiens	157697	H. sapiens	0.0	0.0	0.0	0.0	0.0	0.0	0.0	0.0	0.0	0.0	0.0	0.0	0.0	0.0	0.0	0.0	0.0	0.0	0.0	0.0
ERLIN1	10613	symbol	H. sapiens	10613	H. sapiens	0.0	0.0	0.0	0.0	0.0	0.0	0.0	0.0	0.0	0.0	0.0	0.0	0.0	1.0	0.0	0.0	0.0	0.0	0.0	0.0
ERV3-1	2086	symbol	H. sapiens	2086	H. sapiens	0.0	0.0	0.0	0.0	0.0	0.0	0.0	0.0	0.0	0.0	0.0	0.0	0.0	0.0	0.0	0.0	0.0	0.0	0.0	0.0
ESR1	2099	symbol	H. sapiens	2099	H. sapiens	0.0	0.0	1.0	1.0	0.0	0.0	0.0	0.0	1.0	0.0	0.0	0.0	0.0	0.0	0.0	0.0	0.0	0.0	0.0	0.0
ETF1	2107	symbol	H. sapiens	2107	H. sapiens	1.0	0.0	0.0	0.0	0.0	0.0	1.0	0.0	0.0	0.0	0.0	0.0	0.0	0.0	1.0	0.0	0.0	0.0	0.0	0.0
ETFB	2109	symbol	H. sapiens	2109	H. sapiens	0.0	0.0	0.0	0.0	0.0	0.0	0.0	1.0	0.0	0.0	0.0	0.0	0.0	0.0	0.0	0.0	0.0	0.0	0.0	0.0
ETHE1	23474	symbol	H. sapiens	23474	H. sapiens	0.0	0.0	0.0	0.0	0.0	0.0	0.0	1.0	0.0	0.0	0.0	0.0	0.0	0.0	0.0	0.0	0.0	0.0	0.0	0.0
ETS2	2114	symbol	H. sapiens	2114	H. sapiens	0.0	0.0	1.0	0.0	0.0	0.0	0.0	0.0	0.0	0.0	0.0	0.0	0.0	0.0	0.0	0.0	0.0	0.0	0.0	0.0
EVA1A	84141	symbol	H. sapiens	84141	H. sapiens	0.0	0.0	0.0	0.0	0.0	0.0	0.0	0.0	0.0	0.0	0.0	0.0	0.0	0.0	0.0	0.0	0.0	0.0	0.0	0.0
EXOC8	149371	symbol	H. sapiens	149371	H. sapiens	0.0	0.0	0.0	0.0	0.0	0.0	0.0	0.0	0.0	0.0	0.0	0.0	0.0	0.0	0.0	0.0	0.0	0.0	0.0	0.0
EXOSC5	56915	symbol	H. sapiens	56915	H. sapiens	1.0	0.0	0.0	0.0	1.0	0.0	0.0	0.0	0.0	1.0	0.0	1.0	0.0	0.0	1.0	0.0	0.0	0.0	0.0	0.0
F10	2159	symbol	H. sapiens	2159	H. sapiens	0.0	0.0	0.0	0.0	0.0	0.0	0.0	0.0	0.0	0.0	0.0	0.0	0.0	0.0	0.0	0.0	0.0	0.0	0.0	0.0
FAAP100	80233	symbol	H. sapiens	80233	H. sapiens	0.0	0.0	0.0	0.0	0.0	0.0	0.0	0.0	0.0	0.0	0.0	0.0	0.0	1.0	0.0	0.0	0.0	0.0	0.0	0.0
FABP4	2167	symbol	H. sapiens	2167	H. sapiens	0.0	0.0	0.0	0.0	0.0	0.0	0.0	0.0	1.0	0.0	0.0	0.0	0.0	0.0	0.0	0.0	0.0	1.0	0.0	0.0
FAM107B	83641	symbol	H. sapiens	83641	H. sapiens	0.0	0.0	0.0	0.0	0.0	0.0	0.0	0.0	0.0	0.0	0.0	0.0	0.0	0.0	0.0	0.0	0.0	0.0	0.0	0.0
FAM110C	642273	symbol	H. sapiens	642273	H. sapiens	0.0	0.0	0.0	0.0	0.0	0.0	0.0	0.0	0.0	0.0	0.0	0.0	0.0	0.0	0.0	0.0	0.0	0.0	0.0	0.0
FAM111B	374393	symbol	H. sapiens	374393	H. sapiens	0.0	0.0	0.0	0.0	0.0	0.0	0.0	0.0	0.0	0.0	0.0	0.0	0.0	0.0	0.0	0.0	0.0	0.0	0.0	0.0
FAM117B	150864	symbol	H. sapiens	150864	H. sapiens	0.0	0.0	0.0	0.0	0.0	0.0	0.0	0.0	0.0	0.0	0.0	0.0	0.0	0.0	0.0	0.0	0.0	0.0	0.0	0.0
FAM122B	159090	gene_synonym	H. sapiens	159090	H. sapiens	0.0	0.0	0.0	0.0	0.0	0.0	0.0	0.0	1.0	0.0	0.0	0.0	0.0	0.0	0.0	0.0	0.0	0.0	0.0	0.0
FAM134B	54463	gene_synonym	H. sapiens	54463	H. sapiens	0.0	0.0	0.0	0.0	0.0	0.0	0.0	0.0	0.0	0.0	0.0	0.0	0.0	0.0	0.0	0.0	0.0	0.0	0.0	0.0
FAM193A	8603	symbol	H. sapiens	8603	H. sapiens	0.0	0.0	0.0	0.0	0.0	0.0	0.0	0.0	0.0	0.0	0.0	0.0	0.0	0.0	0.0	0.0	0.0	0.0	0.0	0.0
FAM207A	85395	gene_synonym	H. sapiens	85395	H. sapiens	1.0	0.0	0.0	0.0	1.0	0.0	0.0	0.0	0.0	0.0	0.0	0.0	0.0	0.0	0.0	0.0	0.0	0.0	0.0	0.0
FAM210B	116151	symbol	H. sapiens	116151	H. sapiens	0.0	0.0	0.0	0.0	0.0	0.0	0.0	1.0	0.0	0.0	0.0	0.0	0.0	0.0	0.0	0.0	0.0	0.0	0.0	0.0
FAM214B	80256	symbol	H. sapiens	80256	H. sapiens	0.0	0.0	0.0	0.0	0.0	0.0	0.0	0.0	0.0	0.0	0.0	0.0	0.0	0.0	0.0	0.0	0.0	0.0	0.0	0.0
FAM32A	26017	symbol	H. sapiens	26017	H. sapiens	0.0	0.0	0.0	0.0	0.0	0.0	0.0	0.0	0.0	0.0	0.0	0.0	0.0	0.0	0.0	0.0	0.0	0.0	0.0	0.0
FAM3C	10447	symbol	H. sapiens	10447	H. sapiens	0.0	0.0	0.0	0.0	0.0	0.0	0.0	0.0	0.0	0.0	0.0	0.0	0.0	0.0	0.0	0.0	0.0	0.0	0.0	0.0
FAM46A	55603	gene_synonym	H. sapiens	55603	H. sapiens	0.0	0.0	0.0	0.0	0.0	0.0	0.0	0.0	0.0	0.0	0.0	0.0	0.0	0.0	1.0	0.0	0.0	0.0	0.0	0.0
FAM46C	54855	gene_synonym	H. sapiens	54855	H. sapiens	0.0	0.0	0.0	0.0	0.0	0.0	0.0	0.0	0.0	0.0	0.0	0.0	0.0	0.0	1.0	0.0	0.0	0.0	0.0	0.0
FAM50A	9130	symbol	H. sapiens	9130	H. sapiens	1.0	0.0	0.0	1.0	0.0	0.0	0.0	0.0	0.0	0.0	0.0	0.0	0.0	0.0	0.0	0.0	0.0	0.0	0.0	0.0
FAM50B	26240	symbol	H. sapiens	26240	H. sapiens	0.0	0.0	0.0	1.0	0.0	0.0	0.0	0.0	0.0	0.0	0.0	0.0	0.0	0.0	0.0	0.0	0.0	0.0	0.0	0.0
FAM78B	149297	symbol	H. sapiens	149297	H. sapiens	0.0	0.0	0.0	0.0	0.0	0.0	0.0	0.0	0.0	0.0	0.0	0.0	0.0	0.0	0.0	0.0	0.0	0.0	0.0	0.0
FAM8A1	51439	symbol	H. sapiens	51439	H. sapiens	0.0	0.0	0.0	0.0	0.0	0.0	0.0	0.0	0.0	0.0	0.0	0.0	1.0	1.0	0.0	0.0	0.0	0.0	0.0	0.0
FAM96A	84191	gene_synonym	H. sapiens	84191	H. sapiens	0.0	0.0	0.0	0.0	0.0	0.0	0.0	0.0	0.0	0.0	0.0	0.0	0.0	0.0	0.0	0.0	1.0	0.0	0.0	0.0
FAM98A	25940	symbol	H. sapiens	25940	H. sapiens	0.0	0.0	0.0	0.0	0.0	0.0	1.0	0.0	0.0	0.0	0.0	0.0	1.0	0.0	0.0	0.0	0.0	0.0	0.0	0.0
FAT1	2195	symbol	H. sapiens	2195	H. sapiens	0.0	0.0	0.0	0.0	0.0	0.0	0.0	0.0	0.0	0.0	0.0	0.0	0.0	0.0	0.0	0.0	0.0	0.0	0.0	0.0
FAT4	79633	symbol	H. sapiens	79633	H. sapiens	0.0	0.0	0.0	0.0	0.0	0.0	0.0	0.0	0.0	0.0	0.0	0.0	0.0	0.0	0.0	0.0	0.0	0.0	0.0	0.0
FBL	2091	symbol	H. sapiens	2091	H. sapiens	1.0	0.0	1.0	0.0	1.0	0.0	1.0	0.0	0.0	0.0	0.0	0.0	0.0	0.0	0.0	0.0	0.0	0.0	0.0	0.0
FBXO17	115290	symbol	H. sapiens	115290	H. sapiens	0.0	0.0	0.0	0.0	0.0	0.0	0.0	0.0	0.0	0.0	0.0	0.0	1.0	1.0	0.0	0.0	0.0	0.0	0.0	0.0
FBXO18	84893	gene_synonym	H. sapiens	84893	H. sapiens	0.0	0.0	0.0	0.0	0.0	0.0	0.0	0.0	0.0	0.0	0.0	1.0	1.0	1.0	0.0	1.0	0.0	1.0	0.0	0.0
FBXO21	23014	symbol	H. sapiens	23014	H. sapiens	0.0	0.0	0.0	0.0	0.0	0.0	0.0	0.0	0.0	0.0	0.0	0.0	1.0	1.0	0.0	0.0	0.0	0.0	0.0	0.0
FBXO45	200933	symbol	H. sapiens	200933	H. sapiens	0.0	0.0	0.0	0.0	0.0	0.0	0.0	0.0	0.0	0.0	0.0	1.0	1.0	1.0	0.0	0.0	0.0	0.0	0.0	0.0
FBXO48	554251	symbol	H. sapiens	554251	H. sapiens	0.0	0.0	0.0	0.0	0.0	0.0	0.0	0.0	0.0	0.0	0.0	0.0	1.0	1.0	0.0	0.0	0.0	0.0	0.0	0.0
FERMT2	10979	symbol	H. sapiens	10979	H. sapiens	0.0	0.0	0.0	0.0	0.0	0.0	0.0	0.0	1.0	0.0	0.0	0.0	0.0	0.0	0.0	0.0	0.0	1.0	0.0	0.0
FH	2271	symbol	H. sapiens	2271	H. sapiens	0.0	0.0	0.0	0.0	0.0	0.0	0.0	1.0	0.0	0.0	0.0	1.0	0.0	0.0	0.0	0.0	0.0	0.0	0.0	0.0
FIGN	55137	symbol	H. sapiens	55137	H. sapiens	0.0	0.0	0.0	0.0	0.0	0.0	0.0	0.0	0.0	0.0	0.0	0.0	0.0	0.0	0.0	0.0	1.0	0.0	0.0	0.0
FKBP2	2286	symbol	H. sapiens	2286	H. sapiens	0.0	0.0	0.0	0.0	0.0	0.0	0.0	0.0	0.0	0.0	0.0	0.0	0.0	0.0	0.0	0.0	0.0	0.0	0.0	0.0
FLAD1	80308	symbol	H. sapiens	80308	H. sapiens	0.0	1.0	0.0	0.0	0.0	0.0	0.0	1.0	0.0	0.0	0.0	0.0	0.0	0.0	0.0	0.0	0.0	0.0	0.0	0.0
FLJ42393	401105	symbol	H. sapiens	401105	H. sapiens	0.0	0.0	0.0	0.0	0.0	0.0	0.0	0.0	0.0	0.0	0.0	0.0	0.0	0.0	0.0	0.0	0.0	0.0	0.0	0.0
FLJ42627	645644	symbol	H. sapiens	645644	H. sapiens	0.0	0.0	0.0	0.0	0.0	0.0	0.0	0.0	0.0	0.0	0.0	0.0	0.0	0.0	0.0	0.0	0.0	0.0	0.0	0.0
FMO1	2326	symbol	H. sapiens	2326	H. sapiens	0.0	0.0	0.0	0.0	0.0	0.0	0.0	0.0	0.0	0.0	0.0	0.0	0.0	0.0	0.0	0.0	0.0	0.0	0.0	0.0
FMO5	2330	symbol	H. sapiens	2330	H. sapiens	0.0	0.0	0.0	0.0	0.0	0.0	0.0	0.0	0.0	0.0	0.0	0.0	0.0	0.0	0.0	0.0	0.0	0.0	0.0	0.0
FNBP4	23360	symbol	H. sapiens	23360	H. sapiens	0.0	0.0	0.0	0.0	0.0	1.0	0.0	0.0	0.0	0.0	0.0	0.0	0.0	0.0	0.0	0.0	0.0	0.0	0.0	0.0
FNIP2	57600	symbol	H. sapiens	57600	H. sapiens	0.0	0.0	0.0	0.0	0.0	0.0	0.0	0.0	0.0	0.0	0.0	1.0	0.0	0.0	0.0	0.0	0.0	1.0	0.0	0.0
FOS	2353	symbol	H. sapiens	2353	H. sapiens	0.0	1.0	1.0	0.0	0.0	0.0	1.0	0.0	0.0	0.0	0.0	1.0	0.0	0.0	0.0	0.0	0.0	0.0	0.0	0.0
FOSB	2354	symbol	H. sapiens	2354	H. sapiens	0.0	1.0	1.0	0.0	0.0	0.0	0.0	0.0	0.0	0.0	0.0	0.0	0.0	0.0	0.0	0.0	0.0	0.0	0.0	0.0
FOXA2	3170	symbol	H. sapiens	3170	H. sapiens	0.0	0.0	0.0	1.0	0.0	0.0	0.0	0.0	1.0	0.0	0.0	0.0	0.0	0.0	0.0	0.0	0.0	1.0	0.0	0.0
FOXD3	27022	symbol	H. sapiens	27022	H. sapiens	0.0	0.0	0.0	0.0	0.0	0.0	0.0	0.0	0.0	0.0	0.0	0.0	0.0	0.0	0.0	0.0	0.0	0.0	0.0	0.0
FRMD4B	23150	symbol	H. sapiens	23150	H. sapiens	0.0	0.0	0.0	0.0	0.0	0.0	0.0	0.0	0.0	0.0	0.0	0.0	0.0	0.0	0.0	0.0	0.0	0.0	0.0	0.0
FRYL	285527	symbol	H. sapiens	285527	H. sapiens	0.0	0.0	0.0	0.0	0.0	0.0	0.0	0.0	0.0	0.0	0.0	0.0	0.0	0.0	0.0	0.0	0.0	0.0	0.0	0.0
FST	10468	symbol	H. sapiens	10468	H. sapiens	0.0	0.0	0.0	0.0	0.0	0.0	0.0	0.0	0.0	0.0	0.0	0.0	0.0	0.0	0.0	0.0	0.0	0.0	0.0	0.0
FUBP3	8939	symbol	H. sapiens	8939	H. sapiens	0.0	1.0	0.0	0.0	0.0	0.0	0.0	0.0	0.0	0.0	0.0	0.0	0.0	0.0	0.0	0.0	0.0	0.0	0.0	0.0
FUCA1	2517	symbol	H. sapiens	2517	H. sapiens	0.0	0.0	0.0	0.0	0.0	0.0	0.0	0.0	0.0	0.0	0.0	0.0	0.0	0.0	0.0	0.0	0.0	0.0	0.0	0.0
FUOM	282969	symbol	H. sapiens	282969	H. sapiens	0.0	0.0	0.0	0.0	0.0	0.0	0.0	0.0	0.0	0.0	0.0	0.0	0.0	0.0	0.0	0.0	0.0	0.0	0.0	0.0
FXR1	8087	symbol	H. sapiens	8087	H. sapiens	1.0	0.0	0.0	0.0	0.0	0.0	0.0	0.0	0.0	0.0	0.0	0.0	0.0	0.0	1.0	1.0	0.0	1.0	1.0	0.0
GAB1	2549	symbol	H. sapiens	2549	H. sapiens	0.0	0.0	0.0	0.0	0.0	0.0	0.0	0.0	0.0	0.0	0.0	0.0	0.0	0.0	0.0	0.0	0.0	0.0	0.0	0.0
GABARAPL1	23710	symbol	H. sapiens	23710	H. sapiens	0.0	0.0	1.0	0.0	0.0	0.0	0.0	0.0	0.0	0.0	0.0	0.0	0.0	0.0	0.0	0.0	0.0	0.0	0.0	0.0
GABBR1	2550	symbol	H. sapiens	2550	H. sapiens	0.0	0.0	0.0	0.0	0.0	0.0	0.0	1.0	1.0	0.0	0.0	0.0	0.0	0.0	0.0	0.0	0.0	0.0	0.0	0.0
GABPB1	2553	symbol	H. sapiens	2553	H. sapiens	0.0	0.0	0.0	0.0	0.0	0.0	0.0	0.0	0.0	0.0	0.0	0.0	0.0	0.0	1.0	0.0	0.0	0.0	0.0	0.0
GADD45B	4616	symbol	H. sapiens	4616	H. sapiens	0.0	0.0	0.0	0.0	0.0	0.0	0.0	0.0	1.0	0.0	0.0	0.0	0.0	0.0	0.0	1.0	0.0	1.0	0.0	0.0
GADD45G	10912	symbol	H. sapiens	10912	H. sapiens	0.0	0.0	0.0	0.0	0.0	0.0	0.0	0.0	0.0	0.0	0.0	0.0	0.0	0.0	0.0	1.0	0.0	0.0	0.0	0.0
GALE	2582	symbol	H. sapiens	2582	H. sapiens	0.0	0.0	0.0	0.0	0.0	0.0	0.0	0.0	0.0	0.0	0.0	0.0	0.0	0.0	0.0	0.0	0.0	0.0	1.0	0.0
GALNT1	2589	symbol	H. sapiens	2589	H. sapiens	0.0	0.0	0.0	0.0	0.0	0.0	0.0	0.0	0.0	0.0	0.0	0.0	0.0	0.0	0.0	0.0	0.0	0.0	0.0	0.0
GALT	2592	symbol	H. sapiens	2592	H. sapiens	0.0	0.0	0.0	0.0	0.0	0.0	0.0	0.0	0.0	0.0	0.0	0.0	0.0	0.0	0.0	0.0	0.0	0.0	0.0	0.0
GATA5	140628	symbol	H. sapiens	140628	H. sapiens	0.0	0.0	0.0	0.0	0.0	0.0	0.0	0.0	0.0	0.0	0.0	0.0	0.0	0.0	0.0	0.0	0.0	0.0	0.0	0.0
GATAD1	57798	symbol	H. sapiens	57798	H. sapiens	0.0	0.0	0.0	1.0	0.0	0.0	0.0	0.0	0.0	0.0	0.0	0.0	0.0	0.0	0.0	0.0	0.0	0.0	0.0	0.0
GATAD2A	54815	symbol	H. sapiens	54815	H. sapiens	0.0	0.0	1.0	1.0	0.0	1.0	1.0	0.0	0.0	0.0	0.0	1.0	0.0	0.0	0.0	0.0	0.0	0.0	0.0	0.0
GBAS	2631	gene_synonym	H. sapiens	2631	H. sapiens	0.0	0.0	0.0	0.0	0.0	0.0	0.0	1.0	0.0	0.0	0.0	0.0	0.0	0.0	0.0	0.0	0.0	0.0	0.0	0.0
GBP2	2634	symbol	H. sapiens	2634	H. sapiens	0.0	0.0	0.0	0.0	0.0	0.0	0.0	0.0	0.0	0.0	0.0	0.0	0.0	0.0	0.0	0.0	0.0	0.0	1.0	0.0
GCAT	23464	symbol	H. sapiens	23464	H. sapiens	0.0	0.0	0.0	0.0	0.0	1.0	0.0	1.0	0.0	0.0	0.0	0.0	0.0	0.0	0.0	0.0	0.0	0.0	0.0	0.0
GCDH	2639	symbol	H. sapiens	2639	H. sapiens	0.0	1.0	0.0	0.0	0.0	0.0	0.0	1.0	0.0	0.0	0.0	0.0	0.0	0.0	0.0	0.0	0.0	0.0	0.0	0.0
GCLM	2730	symbol	H. sapiens	2730	H. sapiens	0.0	0.0	0.0	0.0	0.0	0.0	0.0	0.0	0.0	0.0	0.0	0.0	0.0	0.0	0.0	0.0	0.0	0.0	0.0	0.0
GDF7	151449	symbol	H. sapiens	151449	H. sapiens	0.0	0.0	0.0	0.0	0.0	0.0	0.0	0.0	0.0	0.0	0.0	0.0	0.0	0.0	0.0	0.0	0.0	1.0	0.0	0.0
GFER	2671	symbol	H. sapiens	2671	H. sapiens	0.0	0.0	0.0	0.0	0.0	0.0	0.0	1.0	0.0	0.0	0.0	0.0	0.0	0.0	0.0	1.0	0.0	0.0	0.0	0.0
GID8	54994	symbol	H. sapiens	54994	H. sapiens	0.0	0.0	0.0	0.0	0.0	0.0	0.0	0.0	0.0	0.0	0.0	0.0	1.0	1.0	0.0	0.0	0.0	0.0	1.0	0.0
GIT2	9815	symbol	H. sapiens	9815	H. sapiens	0.0	0.0	0.0	0.0	0.0	0.0	0.0	0.0	0.0	0.0	0.0	0.0	0.0	0.0	0.0	0.0	0.0	0.0	0.0	0.0
GLCE	26035	symbol	H. sapiens	26035	H. sapiens	0.0	0.0	0.0	0.0	0.0	0.0	0.0	0.0	0.0	0.0	0.0	0.0	0.0	0.0	0.0	0.0	0.0	0.0	1.0	0.0
GLTSCR2	29997	gene_synonym	H. sapiens	29997	H. sapiens	1.0	0.0	0.0	0.0	1.0	0.0	0.0	0.0	1.0	1.0	0.0	1.0	0.0	0.0	0.0	0.0	1.0	0.0	0.0	0.0
GLYCTK	132158	symbol	H. sapiens	132158	H. sapiens	0.0	0.0	0.0	0.0	0.0	0.0	0.0	0.0	0.0	0.0	0.0	0.0	0.0	0.0	0.0	0.0	0.0	0.0	0.0	0.0
GMCL1	64395	symbol	H. sapiens	64395	H. sapiens	0.0	0.0	0.0	0.0	0.0	0.0	0.0	0.0	0.0	0.0	0.0	0.0	0.0	0.0	0.0	0.0	0.0	0.0	0.0	0.0
GNL2	29889	symbol	H. sapiens	29889	H. sapiens	0.0	0.0	0.0	0.0	1.0	0.0	0.0	0.0	0.0	0.0	0.0	0.0	0.0	0.0	0.0	0.0	0.0	0.0	0.0	0.0
GNPNAT1	64841	symbol	H. sapiens	64841	H. sapiens	0.0	1.0	0.0	0.0	0.0	0.0	0.0	0.0	0.0	0.0	0.0	0.0	0.0	0.0	0.0	0.0	0.0	0.0	0.0	0.0
GPANK1	7918	symbol	H. sapiens	7918	H. sapiens	0.0	0.0	0.0	0.0	0.0	0.0	0.0	0.0	0.0	0.0	0.0	0.0	0.0	0.0	0.0	0.0	0.0	0.0	0.0	0.0
GPAT3	84803	symbol	H. sapiens	84803	H. sapiens	0.0	0.0	0.0	0.0	0.0	0.0	0.0	0.0	0.0	0.0	0.0	0.0	0.0	0.0	0.0	0.0	0.0	0.0	0.0	0.0
GPATCH11	253635	symbol	H. sapiens	253635	H. sapiens	0.0	0.0	0.0	0.0	0.0	0.0	0.0	0.0	0.0	0.0	0.0	0.0	0.0	0.0	0.0	0.0	0.0	0.0	0.0	0.0
GPATCH8	23131	symbol	H. sapiens	23131	H. sapiens	0.0	0.0	0.0	0.0	0.0	0.0	0.0	0.0	0.0	0.0	0.0	0.0	0.0	0.0	0.0	0.0	0.0	0.0	0.0	0.0
GPR18	2841	symbol	H. sapiens	2841	H. sapiens	0.0	0.0	0.0	0.0	0.0	0.0	0.0	0.0	0.0	0.0	0.0	0.0	0.0	0.0	0.0	0.0	0.0	0.0	0.0	0.0
GPR21	2844	symbol	H. sapiens	2844	H. sapiens	0.0	0.0	0.0	0.0	0.0	0.0	0.0	0.0	0.0	0.0	0.0	0.0	0.0	0.0	0.0	0.0	0.0	0.0	0.0	0.0
GPR52	9293	symbol	H. sapiens	9293	H. sapiens	0.0	0.0	0.0	0.0	0.0	0.0	0.0	0.0	0.0	0.0	0.0	0.0	0.0	0.0	0.0	0.0	0.0	0.0	0.0	0.0
GPRC5C	55890	symbol	H. sapiens	55890	H. sapiens	0.0	0.0	0.0	0.0	0.0	0.0	0.0	0.0	0.0	0.0	0.0	0.0	0.0	0.0	0.0	0.0	0.0	1.0	0.0	0.0
GRIA3	2892	symbol	H. sapiens	2892	H. sapiens	0.0	0.0	0.0	0.0	0.0	0.0	0.0	0.0	0.0	0.0	0.0	0.0	0.0	0.0	0.0	0.0	0.0	0.0	0.0	0.0
GRIK1-AS2	100379661	symbol	H. sapiens	100379661	H. sapiens	0.0	0.0	0.0	0.0	0.0	0.0	0.0	0.0	0.0	0.0	0.0	0.0	0.0	0.0	0.0	0.0	0.0	0.0	0.0	0.0
GRK5	2869	symbol	H. sapiens	2869	H. sapiens	0.0	0.0	0.0	0.0	0.0	1.0	0.0	0.0	0.0	0.0	0.0	0.0	0.0	0.0	0.0	0.0	0.0	0.0	0.0	0.0
GRTP1	79774	symbol	H. sapiens	79774	H. sapiens	0.0	0.0	0.0	0.0	0.0	0.0	0.0	0.0	0.0	0.0	0.0	0.0	0.0	0.0	0.0	0.0	0.0	0.0	0.0	0.0
GSKIP	51527	symbol	H. sapiens	51527	H. sapiens	0.0	0.0	0.0	0.0	0.0	0.0	0.0	0.0	1.0	0.0	0.0	0.0	0.0	0.0	0.0	0.0	0.0	1.0	0.0	0.0
GSTCD	79807	symbol	H. sapiens	79807	H. sapiens	0.0	0.0	0.0	0.0	0.0	0.0	0.0	0.0	0.0	0.0	0.0	0.0	0.0	0.0	0.0	0.0	0.0	0.0	0.0	0.0
GTF2F1	2962	symbol	H. sapiens	2962	H. sapiens	0.0	1.0	1.0	0.0	0.0	0.0	0.0	0.0	0.0	0.0	0.0	0.0	1.0	0.0	0.0	0.0	0.0	0.0	0.0	0.0
GUCD1	83606	symbol	H. sapiens	83606	H. sapiens	0.0	0.0	0.0	0.0	0.0	0.0	0.0	0.0	0.0	0.0	0.0	0.0	0.0	0.0	0.0	0.0	0.0	0.0	0.0	0.0
H6PD	9563	symbol	H. sapiens	9563	H. sapiens	0.0	0.0	0.0	0.0	0.0	0.0	0.0	0.0	0.0	0.0	0.0	0.0	0.0	0.0	0.0	0.0	0.0	0.0	0.0	0.0
HACD3	51495	symbol	H. sapiens	51495	H. sapiens	0.0	0.0	0.0	0.0	0.0	0.0	0.0	0.0	0.0	0.0	0.0	0.0	0.0	0.0	0.0	0.0	0.0	0.0	0.0	0.0
HACD4	401494	symbol	H. sapiens	401494	H. sapiens	0.0	0.0	0.0	0.0	0.0	0.0	0.0	0.0	0.0	0.0	0.0	0.0	0.0	0.0	0.0	0.0	0.0	0.0	0.0	0.0
HAGH	3029	symbol	H. sapiens	3029	H. sapiens	0.0	0.0	0.0	0.0	0.0	0.0	0.0	1.0	0.0	0.0	0.0	0.0	0.0	0.0	0.0	0.0	0.0	0.0	0.0	0.0
HAL	3034	symbol	H. sapiens	3034	H. sapiens	0.0	0.0	0.0	0.0	0.0	0.0	0.0	0.0	0.0	0.0	0.0	0.0	0.0	0.0	0.0	0.0	0.0	0.0	0.0	0.0
HARS	3035	gene_synonym	H. sapiens	3035	H. sapiens	0.0	0.0	0.0	0.0	1.0	0.0	0.0	0.0	0.0	0.0	0.0	0.0	0.0	0.0	0.0	0.0	0.0	0.0	1.0	0.0
HBEGF	1839	symbol	H. sapiens	1839	H. sapiens	0.0	0.0	0.0	0.0	0.0	0.0	0.0	0.0	0.0	0.0	0.0	0.0	0.0	0.0	0.0	0.0	0.0	1.0	0.0	0.0
HCAR2	338442	symbol	H. sapiens	338442	H. sapiens	0.0	0.0	0.0	0.0	0.0	0.0	0.0	0.0	0.0	0.0	0.0	0.0	0.0	0.0	0.0	0.0	0.0	0.0	0.0	0.0
HCCS	3052	symbol	H. sapiens	3052	H. sapiens	0.0	0.0	0.0	0.0	0.0	0.0	0.0	1.0	0.0	0.0	0.0	0.0	0.0	0.0	0.0	0.0	0.0	0.0	0.0	0.0
HDAC11	79885	symbol	H. sapiens	79885	H. sapiens	0.0	0.0	1.0	1.0	0.0	0.0	1.0	0.0	0.0	0.0	0.0	0.0	0.0	0.0	0.0	0.0	0.0	0.0	0.0	0.0
HDGF	3068	symbol	H. sapiens	3068	H. sapiens	0.0	0.0	1.0	0.0	0.0	0.0	0.0	0.0	0.0	0.0	1.0	0.0	0.0	0.0	0.0	0.0	0.0	0.0	0.0	0.0
HDHD3	81932	symbol	H. sapiens	81932	H. sapiens	0.0	0.0	0.0	0.0	0.0	0.0	0.0	0.0	0.0	0.0	0.0	0.0	0.0	0.0	0.0	0.0	0.0	0.0	0.0	0.0
HDLBP	3069	symbol	H. sapiens	3069	H. sapiens	1.0	0.0	0.0	0.0	0.0	0.0	0.0	0.0	0.0	0.0	0.0	0.0	0.0	0.0	0.0	0.0	0.0	0.0	0.0	0.0
HECTD4	283450	symbol	H. sapiens	283450	H. sapiens	0.0	0.0	0.0	0.0	0.0	0.0	0.0	0.0	0.0	0.0	0.0	0.0	0.0	1.0	0.0	0.0	0.0	0.0	0.0	0.0
HEY2	23493	symbol	H. sapiens	23493	H. sapiens	0.0	0.0	1.0	0.0	0.0	0.0	0.0	0.0	0.0	0.0	0.0	0.0	0.0	0.0	0.0	0.0	0.0	0.0	0.0	0.0
HGS	9146	symbol	H. sapiens	9146	H. sapiens	0.0	0.0	0.0	0.0	0.0	0.0	0.0	0.0	1.0	1.0	0.0	0.0	0.0	0.0	0.0	0.0	0.0	1.0	0.0	0.0
HINT2	84681	symbol	H. sapiens	84681	H. sapiens	0.0	0.0	0.0	0.0	0.0	0.0	0.0	1.0	1.0	0.0	0.0	0.0	0.0	0.0	0.0	0.0	0.0	0.0	0.0	0.0
HINT3	135114	symbol	H. sapiens	135114	H. sapiens	0.0	0.0	0.0	0.0	0.0	0.0	0.0	0.0	0.0	0.0	0.0	0.0	0.0	0.0	0.0	0.0	0.0	0.0	0.0	0.0
HIP1	3092	symbol	H. sapiens	3092	H. sapiens	0.0	0.0	0.0	0.0	0.0	0.0	0.0	0.0	0.0	1.0	0.0	0.0	0.0	0.0	0.0	0.0	0.0	0.0	1.0	0.0
HIPK1	204851	symbol	H. sapiens	204851	H. sapiens	0.0	0.0	0.0	0.0	0.0	1.0	0.0	0.0	0.0	0.0	0.0	1.0	0.0	0.0	0.0	0.0	0.0	0.0	0.0	0.0
HIPK3	10114	symbol	H. sapiens	10114	H. sapiens	1.0	1.0	0.0	0.0	0.0	0.0	0.0	0.0	1.0	0.0	0.0	0.0	0.0	0.0	0.0	1.0	0.0	1.0	0.0	0.0
HIST1H2BM	8342	gene_synonym	H. sapiens	8342	H. sapiens	0.0	0.0	0.0	1.0	0.0	0.0	0.0	0.0	0.0	0.0	0.0	0.0	0.0	0.0	0.0	0.0	0.0	0.0	0.0	0.0
HIVEP1	3096	symbol	H. sapiens	3096	H. sapiens	0.0	0.0	0.0	0.0	0.0	0.0	0.0	0.0	0.0	0.0	0.0	0.0	0.0	0.0	0.0	0.0	0.0	0.0	0.0	0.0
HK3	3101	symbol	H. sapiens	3101	H. sapiens	0.0	0.0	0.0	0.0	0.0	0.0	0.0	0.0	0.0	0.0	0.0	0.0	0.0	0.0	0.0	0.0	0.0	0.0	0.0	0.0
HMBS	3145	symbol	H. sapiens	3145	H. sapiens	0.0	1.0	0.0	0.0	0.0	0.0	0.0	0.0	0.0	0.0	0.0	0.0	0.0	0.0	0.0	0.0	0.0	0.0	0.0	0.0
HMCES	56941	symbol	H. sapiens	56941	H. sapiens	0.0	0.0	0.0	0.0	0.0	0.0	0.0	0.0	0.0	0.0	0.0	1.0	0.0	0.0	0.0	1.0	0.0	0.0	0.0	0.0
HMCN1	83872	symbol	H. sapiens	83872	H. sapiens	0.0	0.0	0.0	0.0	0.0	0.0	0.0	0.0	0.0	0.0	0.0	0.0	0.0	0.0	0.0	0.0	1.0	0.0	0.0	0.0
HMG20B	10362	symbol	H. sapiens	10362	H. sapiens	0.0	0.0	0.0	1.0	0.0	0.0	0.0	0.0	1.0	0.0	0.0	0.0	0.0	0.0	0.0	0.0	0.0	0.0	0.0	0.0
HMGCL	3155	symbol	H. sapiens	3155	H. sapiens	0.0	0.0	0.0	0.0	0.0	0.0	0.0	1.0	0.0	0.0	0.0	0.0	0.0	0.0	0.0	0.0	0.0	0.0	0.0	0.0
HMOX2	3163	symbol	H. sapiens	3163	H. sapiens	0.0	0.0	0.0	0.0	0.0	0.0	0.0	0.0	0.0	0.0	0.0	0.0	0.0	0.0	0.0	0.0	0.0	0.0	0.0	0.0
HN1L	57585	gene_synonym	H. sapiens	57585	H. sapiens	0.0	0.0	0.0	0.0	0.0	0.0	0.0	0.0	0.0	0.0	0.0	0.0	0.0	0.0	0.0	0.0	0.0	0.0	0.0	0.0
HNF1A-AS1	283460	symbol	H. sapiens	283460	H. sapiens	0.0	0.0	0.0	0.0	0.0	0.0	0.0	0.0	0.0	0.0	0.0	0.0	0.0	0.0	0.0	0.0	0.0	0.0	0.0	0.0
HNRNPA0	10949	symbol	H. sapiens	10949	H. sapiens	1.0	0.0	0.0	0.0	0.0	0.0	0.0	0.0	0.0	0.0	0.0	0.0	0.0	0.0	1.0	0.0	0.0	0.0	0.0	0.0
HNRNPU	3192	symbol	H. sapiens	3192	H. sapiens	1.0	0.0	1.0	1.0	0.0	1.0	0.0	0.0	1.0	0.0	1.0	0.0	0.0	0.0	1.0	1.0	1.0	1.0	0.0	0.0
HOGA1	112817	symbol	H. sapiens	112817	H. sapiens	0.0	0.0	0.0	0.0	0.0	0.0	0.0	1.0	0.0	0.0	0.0	0.0	0.0	0.0	0.0	0.0	0.0	0.0	1.0	0.0
HOMER2	9455	symbol	H. sapiens	9455	H. sapiens	0.0	0.0	0.0	0.0	0.0	0.0	0.0	0.0	1.0	0.0	0.0	0.0	0.0	0.0	0.0	0.0	0.0	0.0	0.0	0.0
HOOK1	51361	symbol	H. sapiens	51361	H. sapiens	0.0	0.0	0.0	0.0	0.0	0.0	0.0	0.0	0.0	0.0	0.0	0.0	0.0	0.0	0.0	0.0	0.0	0.0	1.0	0.0
HOXA4	3201	symbol	H. sapiens	3201	H. sapiens	0.0	0.0	0.0	0.0	0.0	0.0	0.0	0.0	0.0	0.0	0.0	0.0	0.0	0.0	0.0	0.0	0.0	0.0	0.0	0.0
HPRT1	3251	symbol	H. sapiens	3251	H. sapiens	0.0	1.0	0.0	0.0	0.0	0.0	0.0	0.0	0.0	0.0	0.0	0.0	0.0	0.0	0.0	0.0	0.0	0.0	0.0	0.0
HPS6	79803	symbol	H. sapiens	79803	H. sapiens	0.0	0.0	0.0	0.0	0.0	0.0	0.0	0.0	0.0	0.0	0.0	0.0	0.0	0.0	0.0	0.0	0.0	0.0	0.0	0.0
HS3ST3B1	9953	symbol	H. sapiens	9953	H. sapiens	0.0	0.0	0.0	0.0	0.0	0.0	0.0	0.0	0.0	0.0	0.0	0.0	0.0	0.0	0.0	0.0	0.0	0.0	0.0	0.0
HSBP1	3281	symbol	H. sapiens	3281	H. sapiens	0.0	0.0	0.0	0.0	0.0	0.0	0.0	0.0	0.0	0.0	1.0	0.0	0.0	0.0	0.0	0.0	0.0	0.0	0.0	0.0
HSCB	150274	symbol	H. sapiens	150274	H. sapiens	0.0	0.0	0.0	0.0	0.0	0.0	0.0	0.0	0.0	0.0	0.0	0.0	0.0	0.0	0.0	0.0	0.0	0.0	0.0	0.0
HSD11B1	3290	symbol	H. sapiens	3290	H. sapiens	0.0	0.0	0.0	0.0	0.0	0.0	0.0	0.0	0.0	0.0	0.0	0.0	0.0	0.0	0.0	0.0	0.0	0.0	1.0	0.0
HSD17B2	3294	symbol	H. sapiens	3294	H. sapiens	0.0	0.0	0.0	0.0	0.0	0.0	0.0	0.0	0.0	0.0	0.0	0.0	0.0	0.0	0.0	0.0	0.0	0.0	0.0	0.0
HUWE1	10075	symbol	H. sapiens	10075	H. sapiens	0.0	0.0	0.0	0.0	0.0	0.0	1.0	0.0	0.0	1.0	0.0	1.0	0.0	1.0	0.0	0.0	0.0	0.0	0.0	0.0
IARS2	55699	symbol	H. sapiens	55699	H. sapiens	0.0	0.0	0.0	0.0	1.0	0.0	0.0	1.0	0.0	0.0	0.0	0.0	0.0	0.0	0.0	0.0	0.0	0.0	0.0	0.0
ICE2	79664	symbol	H. sapiens	79664	H. sapiens	0.0	1.0	0.0	0.0	0.0	0.0	0.0	0.0	0.0	0.0	0.0	0.0	0.0	0.0	0.0	0.0	0.0	0.0	0.0	0.0
IER2	9592	symbol	H. sapiens	9592	H. sapiens	0.0	0.0	0.0	0.0	0.0	0.0	0.0	0.0	0.0	0.0	0.0	0.0	0.0	0.0	0.0	0.0	0.0	0.0	0.0	0.0
IFT46	56912	symbol	H. sapiens	56912	H. sapiens	0.0	0.0	0.0	0.0	0.0	0.0	0.0	0.0	0.0	0.0	0.0	0.0	0.0	0.0	0.0	0.0	0.0	0.0	0.0	0.0
IGF1	3479	symbol	H. sapiens	3479	H. sapiens	0.0	0.0	0.0	0.0	0.0	0.0	0.0	0.0	0.0	1.0	0.0	0.0	0.0	0.0	1.0	0.0	0.0	1.0	0.0	0.0
IGFBP1	3484	symbol	H. sapiens	3484	H. sapiens	0.0	0.0	0.0	0.0	0.0	0.0	0.0	0.0	0.0	0.0	0.0	0.0	0.0	0.0	0.0	0.0	0.0	0.0	0.0	0.0
IGFBP2	3485	symbol	H. sapiens	3485	H. sapiens	0.0	0.0	0.0	0.0	0.0	0.0	0.0	0.0	0.0	0.0	0.0	0.0	0.0	0.0	0.0	0.0	0.0	0.0	0.0	0.0
IKBKG	8517	symbol	H. sapiens	8517	H. sapiens	0.0	0.0	0.0	0.0	0.0	0.0	0.0	0.0	0.0	1.0	0.0	1.0	1.0	0.0	0.0	0.0	0.0	0.0	1.0	0.0
IKZF4	64375	symbol	H. sapiens	64375	H. sapiens	0.0	0.0	1.0	0.0	0.0	0.0	0.0	0.0	0.0	0.0	0.0	0.0	0.0	0.0	0.0	0.0	0.0	0.0	0.0	0.0
IL15	3600	symbol	H. sapiens	3600	H. sapiens	0.0	0.0	0.0	0.0	0.0	1.0	0.0	0.0	0.0	0.0	0.0	0.0	0.0	0.0	0.0	0.0	0.0	1.0	0.0	0.0
IL1RN	3557	symbol	H. sapiens	3557	H. sapiens	0.0	0.0	0.0	0.0	0.0	0.0	0.0	0.0	0.0	0.0	0.0	0.0	0.0	0.0	0.0	0.0	0.0	0.0	0.0	0.0
IMP3	55272	symbol	H. sapiens	55272	H. sapiens	1.0	0.0	0.0	0.0	1.0	0.0	0.0	0.0	0.0	0.0	0.0	0.0	0.0	0.0	0.0	0.0	0.0	0.0	0.0	0.0
IMP4	92856	symbol	H. sapiens	92856	H. sapiens	1.0	0.0	0.0	0.0	1.0	0.0	0.0	0.0	0.0	0.0	0.0	0.0	0.0	0.0	0.0	0.0	0.0	0.0	0.0	0.0
IMPAD1	54928	gene_synonym	H. sapiens	54928	H. sapiens	0.0	0.0	0.0	0.0	0.0	0.0	0.0	0.0	0.0	0.0	0.0	0.0	0.0	0.0	0.0	0.0	0.0	0.0	0.0	0.0
INO80C	125476	symbol	H. sapiens	125476	H. sapiens	0.0	0.0	0.0	1.0	0.0	0.0	0.0	0.0	0.0	0.0	0.0	1.0	1.0	0.0	0.0	1.0	0.0	0.0	0.0	0.0
INO80D	54891	symbol	H. sapiens	54891	H. sapiens	0.0	0.0	0.0	1.0	0.0	0.0	0.0	0.0	0.0	0.0	0.0	1.0	0.0	0.0	0.0	1.0	0.0	0.0	0.0	0.0
INPP1	3628	symbol	H. sapiens	3628	H. sapiens	0.0	0.0	0.0	0.0	0.0	0.0	0.0	0.0	0.0	0.0	0.0	0.0	0.0	0.0	0.0	0.0	0.0	0.0	0.0	0.0
INTS10	55174	symbol	H. sapiens	55174	H. sapiens	0.0	0.0	0.0	0.0	1.0	0.0	0.0	0.0	0.0	0.0	0.0	0.0	0.0	0.0	0.0	0.0	0.0	0.0	0.0	0.0
INTS3	65123	symbol	H. sapiens	65123	H. sapiens	0.0	0.0	0.0	0.0	1.0	0.0	0.0	0.0	0.0	0.0	0.0	1.0	0.0	0.0	0.0	0.0	1.0	0.0	0.0	0.0
IRAK2	3656	symbol	H. sapiens	3656	H. sapiens	0.0	0.0	0.0	0.0	0.0	0.0	0.0	0.0	0.0	0.0	0.0	0.0	0.0	0.0	0.0	0.0	0.0	0.0	1.0	0.0
IRF2BP2	359948	symbol	H. sapiens	359948	H. sapiens	0.0	0.0	0.0	0.0	0.0	0.0	0.0	0.0	0.0	0.0	1.0	0.0	0.0	0.0	0.0	0.0	0.0	0.0	0.0	0.0
IRF2BPL	64207	symbol	H. sapiens	64207	H. sapiens	0.0	0.0	0.0	0.0	0.0	0.0	0.0	0.0	0.0	0.0	1.0	0.0	0.0	1.0	0.0	0.0	0.0	0.0	0.0	0.0
IRF5	3663	symbol	H. sapiens	3663	H. sapiens	0.0	0.0	1.0	0.0	0.0	0.0	0.0	0.0	0.0	0.0	0.0	0.0	0.0	0.0	0.0	0.0	0.0	0.0	0.0	0.0
IRF6	3664	symbol	H. sapiens	3664	H. sapiens	0.0	0.0	1.0	0.0	0.0	0.0	0.0	0.0	0.0	0.0	0.0	0.0	0.0	0.0	0.0	0.0	0.0	0.0	0.0	0.0
IRF8	3394	symbol	H. sapiens	3394	H. sapiens	0.0	0.0	0.0	0.0	0.0	0.0	0.0	0.0	0.0	0.0	0.0	0.0	0.0	0.0	0.0	0.0	0.0	0.0	0.0	0.0
IRS2	8660	symbol	H. sapiens	8660	H. sapiens	0.0	0.0	0.0	0.0	0.0	0.0	0.0	0.0	1.0	1.0	0.0	0.0	0.0	0.0	0.0	0.0	0.0	1.0	0.0	0.0
ISOC2	79763	symbol	H. sapiens	79763	H. sapiens	0.0	0.0	0.0	0.0	0.0	0.0	0.0	0.0	0.0	0.0	0.0	0.0	0.0	0.0	0.0	0.0	0.0	0.0	0.0	0.0
IVD	3712	symbol	H. sapiens	3712	H. sapiens	0.0	0.0	0.0	0.0	0.0	0.0	0.0	1.0	0.0	0.0	0.0	0.0	0.0	0.0	0.0	0.0	0.0	0.0	0.0	0.0
JAGN1	84522	symbol	H. sapiens	84522	H. sapiens	0.0	0.0	0.0	0.0	0.0	0.0	0.0	0.0	0.0	0.0	0.0	0.0	0.0	0.0	0.0	0.0	0.0	0.0	0.0	0.0
JDP2	122953	symbol	H. sapiens	122953	H. sapiens	0.0	0.0	0.0	0.0	0.0	0.0	0.0	0.0	0.0	0.0	0.0	0.0	0.0	0.0	0.0	0.0	0.0	0.0	1.0	1.0
JOSD1	9929	symbol	H. sapiens	9929	H. sapiens	0.0	0.0	0.0	0.0	0.0	0.0	0.0	0.0	0.0	0.0	0.0	0.0	0.0	0.0	0.0	0.0	0.0	0.0	0.0	0.0
JUN	3725	symbol	H. sapiens	3725	H. sapiens	0.0	0.0	1.0	0.0	0.0	0.0	0.0	0.0	1.0	0.0	0.0	0.0	0.0	0.0	0.0	0.0	0.0	0.0	0.0	0.0
JUNB	3726	symbol	H. sapiens	3726	H. sapiens	0.0	0.0	1.0	0.0	0.0	0.0	0.0	0.0	0.0	0.0	0.0	0.0	0.0	0.0	0.0	0.0	0.0	0.0	0.0	0.0
JUND	3727	symbol	H. sapiens	3727	H. sapiens	0.0	1.0	1.0	0.0	0.0	0.0	0.0	0.0	0.0	0.0	0.0	0.0	0.0	0.0	0.0	0.0	0.0	0.0	0.0	0.0
KANSL1	284058	symbol	H. sapiens	284058	H. sapiens	0.0	0.0	0.0	1.0	0.0	0.0	1.0	0.0	0.0	0.0	0.0	0.0	1.0	0.0	0.0	0.0	0.0	0.0	0.0	1.0
KAT5	10524	symbol	H. sapiens	10524	H. sapiens	0.0	0.0	1.0	1.0	0.0	0.0	1.0	0.0	0.0	1.0	1.0	1.0	1.0	1.0	0.0	1.0	0.0	0.0	0.0	0.0
KAT8	84148	symbol	H. sapiens	84148	H. sapiens	0.0	0.0	1.0	1.0	0.0	0.0	1.0	0.0	0.0	0.0	1.0	0.0	1.0	0.0	0.0	0.0	0.0	0.0	0.0	1.0
KAZN	23254	symbol	H. sapiens	23254	H. sapiens	0.0	0.0	0.0	0.0	0.0	1.0	0.0	0.0	0.0	0.0	0.0	0.0	0.0	0.0	0.0	0.0	0.0	0.0	0.0	0.0
KCNA10	3744	symbol	H. sapiens	3744	H. sapiens	0.0	0.0	0.0	0.0	0.0	0.0	0.0	0.0	0.0	0.0	0.0	0.0	0.0	0.0	0.0	0.0	0.0	0.0	0.0	0.0
KCNK1	3775	symbol	H. sapiens	3775	H. sapiens	0.0	0.0	0.0	0.0	0.0	0.0	0.0	0.0	0.0	0.0	0.0	0.0	0.0	0.0	0.0	0.0	0.0	0.0	0.0	0.0
KCTD11	147040	symbol	H. sapiens	147040	H. sapiens	0.0	0.0	0.0	0.0	0.0	0.0	0.0	0.0	0.0	0.0	0.0	0.0	0.0	1.0	0.0	0.0	0.0	0.0	0.0	0.0
KCTD5	54442	symbol	H. sapiens	54442	H. sapiens	0.0	0.0	0.0	0.0	0.0	0.0	0.0	0.0	0.0	0.0	0.0	0.0	1.0	1.0	0.0	0.0	0.0	0.0	0.0	0.0
KCTD7	154881	symbol	H. sapiens	154881	H. sapiens	0.0	0.0	0.0	0.0	0.0	0.0	0.0	0.0	0.0	0.0	0.0	0.0	0.0	0.0	0.0	0.0	0.0	0.0	0.0	0.0
KDM7A	80853	symbol	H. sapiens	80853	H. sapiens	0.0	0.0	0.0	1.0	0.0	0.0	1.0	0.0	0.0	0.0	1.0	0.0	0.0	0.0	0.0	0.0	0.0	0.0	0.0	0.0
KIAA0753	9851	symbol	H. sapiens	9851	H. sapiens	0.0	0.0	0.0	0.0	0.0	0.0	0.0	0.0	0.0	0.0	0.0	0.0	0.0	0.0	0.0	0.0	0.0	0.0	0.0	0.0
KIAA0825	285600	symbol	H. sapiens	285600	H. sapiens	0.0	0.0	0.0	0.0	0.0	0.0	0.0	0.0	0.0	0.0	0.0	0.0	0.0	0.0	0.0	0.0	0.0	0.0	0.0	0.0
KIAA0907	22889	gene_synonym	H. sapiens	22889	H. sapiens	1.0	0.0	0.0	0.0	1.0	0.0	0.0	0.0	0.0	0.0	0.0	0.0	0.0	0.0	0.0	0.0	0.0	0.0	0.0	0.0
KIAA1109	84162	symbol	H. sapiens	84162	H. sapiens	0.0	0.0	0.0	0.0	0.0	0.0	0.0	0.0	0.0	0.0	0.0	0.0	0.0	0.0	0.0	0.0	0.0	0.0	0.0	0.0
KIAA1456	57604	gene_synonym	H. sapiens	57604	H. sapiens	0.0	0.0	0.0	0.0	1.0	0.0	1.0	0.0	0.0	0.0	0.0	0.0	0.0	0.0	0.0	0.0	0.0	0.0	0.0	0.0
KIAA1841	84542	gene_synonym	H. sapiens	84542	H. sapiens	0.0	0.0	0.0	0.0	0.0	0.0	0.0	0.0	0.0	0.0	0.0	0.0	0.0	0.0	0.0	0.0	0.0	0.0	0.0	0.0
KIAA2026	158358	symbol	H. sapiens	158358	H. sapiens	0.0	0.0	0.0	0.0	0.0	0.0	0.0	0.0	0.0	0.0	0.0	0.0	0.0	0.0	0.0	0.0	0.0	0.0	0.0	0.0
KLF4	9314	symbol	H. sapiens	9314	H. sapiens	0.0	1.0	1.0	0.0	0.0	0.0	0.0	0.0	1.0	1.0	0.0	0.0	0.0	0.0	0.0	1.0	0.0	1.0	0.0	0.0
KLF8	11279	symbol	H. sapiens	11279	H. sapiens	0.0	0.0	0.0	0.0	0.0	0.0	0.0	0.0	0.0	0.0	0.0	0.0	0.0	0.0	0.0	0.0	0.0	0.0	0.0	0.0
KLF9	687	symbol	H. sapiens	687	H. sapiens	0.0	0.0	0.0	0.0	0.0	0.0	0.0	0.0	0.0	0.0	0.0	0.0	0.0	0.0	0.0	0.0	0.0	0.0	0.0	0.0
KLHDC3	116138	symbol	H. sapiens	116138	H. sapiens	0.0	0.0	0.0	0.0	0.0	0.0	0.0	0.0	0.0	0.0	0.0	1.0	1.0	1.0	0.0	0.0	1.0	0.0	0.0	0.0
KLHDC8B	200942	symbol	H. sapiens	200942	H. sapiens	0.0	0.0	0.0	0.0	0.0	0.0	0.0	0.0	0.0	0.0	0.0	0.0	0.0	0.0	0.0	0.0	1.0	0.0	0.0	0.0
KLHDC9	126823	symbol	H. sapiens	126823	H. sapiens	0.0	0.0	0.0	0.0	0.0	0.0	0.0	0.0	0.0	0.0	0.0	0.0	0.0	0.0	0.0	0.0	0.0	0.0	0.0	0.0
KLHL15	80311	symbol	H. sapiens	80311	H. sapiens	0.0	0.0	0.0	0.0	0.0	0.0	0.0	0.0	0.0	0.0	0.0	0.0	0.0	1.0	0.0	1.0	0.0	0.0	0.0	0.0
KLHL2	11275	symbol	H. sapiens	11275	H. sapiens	0.0	0.0	0.0	0.0	0.0	0.0	0.0	0.0	0.0	0.0	0.0	0.0	1.0	1.0	0.0	0.0	0.0	0.0	0.0	0.0
KLHL29	114818	symbol	H. sapiens	114818	H. sapiens	0.0	0.0	0.0	0.0	0.0	0.0	0.0	0.0	0.0	0.0	0.0	0.0	0.0	0.0	0.0	0.0	0.0	0.0	0.0	0.0
KLRG1	10219	symbol	H. sapiens	10219	H. sapiens	0.0	0.0	0.0	0.0	0.0	0.0	0.0	0.0	0.0	0.0	0.0	0.0	0.0	0.0	0.0	0.0	0.0	0.0	0.0	0.0
KMT2A	4297	symbol	H. sapiens	4297	H. sapiens	0.0	0.0	0.0	1.0	0.0	0.0	1.0	0.0	0.0	0.0	0.0	0.0	1.0	0.0	0.0	1.0	0.0	0.0	1.0	1.0
KMT2C	58508	symbol	H. sapiens	58508	H. sapiens	0.0	0.0	0.0	1.0	0.0	0.0	1.0	0.0	0.0	0.0	1.0	0.0	1.0	0.0	0.0	0.0	0.0	0.0	0.0	0.0
KMT2E	55904	symbol	H. sapiens	55904	H. sapiens	0.0	0.0	0.0	1.0	0.0	1.0	1.0	0.0	0.0	0.0	0.0	1.0	0.0	0.0	0.0	0.0	0.0	0.0	0.0	1.0
KPRP	448834	symbol	H. sapiens	448834	H. sapiens	0.0	0.0	0.0	0.0	0.0	0.0	0.0	0.0	0.0	0.0	0.0	0.0	0.0	0.0	0.0	0.0	0.0	0.0	0.0	0.0
KSR1	8844	symbol	H. sapiens	8844	H. sapiens	0.0	0.0	0.0	0.0	0.0	0.0	0.0	0.0	1.0	0.0	0.0	0.0	0.0	0.0	0.0	0.0	0.0	1.0	0.0	0.0
KTN1	3895	symbol	H. sapiens	3895	H. sapiens	0.0	0.0	0.0	0.0	0.0	0.0	0.0	0.0	0.0	0.0	0.0	0.0	0.0	0.0	0.0	0.0	0.0	0.0	0.0	0.0
KYNU	8942	symbol	H. sapiens	8942	H. sapiens	0.0	1.0	0.0	0.0	0.0	0.0	0.0	0.0	0.0	0.0	0.0	0.0	0.0	0.0	0.0	0.0	0.0	0.0	1.0	0.0
LAMA3	3909	symbol	H. sapiens	3909	H. sapiens	0.0	0.0	0.0	0.0	0.0	0.0	0.0	0.0	0.0	0.0	0.0	0.0	0.0	0.0	0.0	0.0	0.0	0.0	0.0	0.0
LAMA5	3911	symbol	H. sapiens	3911	H. sapiens	0.0	0.0	0.0	0.0	0.0	0.0	0.0	0.0	0.0	0.0	0.0	0.0	0.0	0.0	0.0	0.0	0.0	0.0	0.0	0.0
LAMP3	27074	symbol	H. sapiens	27074	H. sapiens	0.0	0.0	0.0	0.0	0.0	0.0	0.0	0.0	1.0	1.0	0.0	0.0	0.0	0.0	0.0	0.0	0.0	0.0	0.0	0.0
LAS1L	81887	symbol	H. sapiens	81887	H. sapiens	1.0	0.0	0.0	0.0	1.0	0.0	0.0	0.0	0.0	0.0	0.0	0.0	1.0	0.0	0.0	0.0	0.0	0.0	0.0	0.0
LATS1	9113	symbol	H. sapiens	9113	H. sapiens	0.0	0.0	1.0	0.0	0.0	0.0	0.0	0.0	1.0	1.0	0.0	0.0	0.0	0.0	0.0	0.0	1.0	1.0	0.0	0.0
LBR	3930	symbol	H. sapiens	3930	H. sapiens	0.0	0.0	0.0	0.0	0.0	0.0	0.0	1.0	0.0	0.0	0.0	0.0	0.0	0.0	0.0	0.0	0.0	0.0	0.0	0.0
LDB1	8861	symbol	H. sapiens	8861	H. sapiens	0.0	1.0	1.0	0.0	0.0	0.0	1.0	0.0	0.0	0.0	1.0	0.0	0.0	0.0	0.0	0.0	0.0	1.0	1.0	0.0
LDLR	3949	symbol	H. sapiens	3949	H. sapiens	0.0	0.0	0.0	0.0	0.0	0.0	0.0	0.0	0.0	1.0	0.0	0.0	0.0	1.0	0.0	0.0	0.0	0.0	0.0	0.0
LGMN	5641	symbol	H. sapiens	5641	H. sapiens	0.0	0.0	0.0	0.0	0.0	0.0	0.0	0.0	0.0	1.0	0.0	0.0	0.0	1.0	0.0	0.0	0.0	0.0	0.0	0.0
LINC00174	285908	symbol	H. sapiens	285908	H. sapiens	0.0	0.0	0.0	0.0	0.0	0.0	0.0	0.0	0.0	0.0	0.0	0.0	0.0	0.0	0.0	0.0	0.0	0.0	0.0	0.0
LINC00260	84719	symbol	H. sapiens	84719	H. sapiens	0.0	0.0	0.0	0.0	0.0	0.0	0.0	0.0	0.0	0.0	0.0	0.0	0.0	0.0	0.0	0.0	0.0	0.0	0.0	0.0
LINC00268	441426	symbol	H. sapiens	441426	H. sapiens	0.0	0.0	0.0	0.0	0.0	0.0	0.0	0.0	0.0	0.0	0.0	0.0	0.0	0.0	0.0	0.0	0.0	0.0	0.0	0.0
LINC00328	51152	symbol	H. sapiens	51152	H. sapiens	0.0	0.0	0.0	0.0	0.0	0.0	0.0	0.0	0.0	0.0	0.0	0.0	0.0	0.0	0.0	0.0	0.0	0.0	0.0	0.0
LINC00341	161176	gene_synonym	H. sapiens	161176	H. sapiens	0.0	0.0	0.0	0.0	0.0	0.0	0.0	0.0	0.0	0.0	0.0	0.0	0.0	0.0	0.0	0.0	0.0	0.0	0.0	0.0
LINC00665	100506930	symbol	H. sapiens	100506930	H. sapiens	0.0	0.0	0.0	0.0	0.0	0.0	0.0	0.0	0.0	0.0	0.0	0.0	0.0	0.0	0.0	0.0	0.0	0.0	0.0	0.0
LINC00671	388387	symbol	H. sapiens	388387	H. sapiens	0.0	0.0	0.0	0.0	0.0	0.0	0.0	0.0	0.0	0.0	0.0	0.0	0.0	0.0	0.0	0.0	0.0	0.0	0.0	0.0
LINC00852	84657	symbol	H. sapiens	84657	H. sapiens	0.0	0.0	0.0	0.0	0.0	0.0	0.0	0.0	0.0	0.0	0.0	0.0	0.0	0.0	0.0	0.0	0.0	0.0	0.0	0.0
LINC00885	401109	symbol	H. sapiens	401109	H. sapiens	0.0	0.0	0.0	0.0	0.0	0.0	0.0	0.0	0.0	0.0	0.0	0.0	0.0	0.0	0.0	0.0	0.0	0.0	0.0	0.0
LINC01138	388685	symbol	H. sapiens	388685	H. sapiens	0.0	0.0	0.0	0.0	0.0	0.0	0.0	0.0	0.0	0.0	0.0	0.0	0.0	0.0	0.0	0.0	0.0	0.0	0.0	0.0
LINC01599	196913	symbol	H. sapiens	196913	H. sapiens	0.0	0.0	0.0	0.0	0.0	0.0	0.0	0.0	0.0	0.0	0.0	0.0	0.0	0.0	0.0	0.0	0.0	0.0	0.0	0.0
LMNA	4000	symbol	H. sapiens	4000	H. sapiens	0.0	0.0	0.0	0.0	0.0	1.0	0.0	0.0	0.0	0.0	0.0	1.0	0.0	0.0	0.0	0.0	0.0	0.0	0.0	1.0
LMO7DN	729420	symbol	H. sapiens	729420	H. sapiens	0.0	0.0	0.0	0.0	0.0	0.0	0.0	0.0	0.0	0.0	0.0	0.0	0.0	0.0	0.0	0.0	0.0	0.0	0.0	0.0
LOC100133315	100133315	Gene_ID	H. sapiens	100133315	H. sapiens	0.0	0.0	0.0	0.0	0.0	0.0	0.0	0.0	0.0	0.0	0.0	1.0	0.0	0.0	0.0	0.0	0.0	0.0	0.0	0.0
LOC101927770	101927770	Gene_ID	H. sapiens	101927770	H. sapiens	0.0	0.0	0.0	0.0	0.0	0.0	0.0	0.0	0.0	0.0	0.0	0.0	0.0	0.0	0.0	0.0	0.0	0.0	0.0	0.0
LOC102724229						nan	nan	nan	nan	nan	nan	nan	nan	nan	nan	nan	nan	nan	nan	nan	nan	nan	nan	nan	nan
LOC171391	171391	Gene_ID	H. sapiens	171391	H. sapiens	0.0	0.0	0.0	0.0	0.0	0.0	0.0	0.0	0.0	0.0	0.0	0.0	0.0	0.0	0.0	0.0	0.0	0.0	0.0	0.0
LOC202181	202181	Gene_ID	H. sapiens	202181	H. sapiens	0.0	0.0	0.0	0.0	0.0	0.0	0.0	0.0	0.0	0.0	0.0	0.0	0.0	0.0	0.0	0.0	0.0	0.0	0.0	0.0
LOC650293	650293	Gene_ID	H. sapiens	650293	H. sapiens	0.0	0.0	0.0	0.0	0.0	0.0	0.0	0.0	0.0	0.0	0.0	0.0	0.0	0.0	0.0	0.0	0.0	0.0	0.0	0.0
LONRF1	91694	symbol	H. sapiens	91694	H. sapiens	0.0	0.0	0.0	0.0	0.0	0.0	0.0	0.0	0.0	0.0	0.0	0.0	0.0	1.0	0.0	0.0	0.0	0.0	0.0	0.0
LPL	4023	symbol	H. sapiens	4023	H. sapiens	0.0	0.0	0.0	0.0	0.0	0.0	0.0	0.0	0.0	0.0	0.0	0.0	0.0	0.0	0.0	0.0	0.0	0.0	1.0	0.0
LPP	4026	symbol	H. sapiens	4026	H. sapiens	0.0	0.0	0.0	0.0	0.0	0.0	0.0	0.0	0.0	0.0	0.0	0.0	0.0	0.0	0.0	0.0	0.0	0.0	0.0	0.0
LPXN	9404	symbol	H. sapiens	9404	H. sapiens	0.0	0.0	0.0	0.0	0.0	1.0	0.0	0.0	0.0	0.0	1.0	0.0	0.0	0.0	0.0	0.0	0.0	0.0	0.0	0.0
LRIG2	9860	symbol	H. sapiens	9860	H. sapiens	0.0	0.0	0.0	0.0	0.0	0.0	0.0	0.0	0.0	1.0	0.0	0.0	0.0	0.0	0.0	1.0	0.0	0.0	0.0	0.0
LRRC37B	114659	symbol	H. sapiens	114659	H. sapiens	0.0	0.0	0.0	0.0	0.0	0.0	0.0	0.0	0.0	0.0	0.0	0.0	0.0	0.0	0.0	0.0	0.0	0.0	0.0	0.0
LSM1	27257	symbol	H. sapiens	27257	H. sapiens	1.0	0.0	0.0	0.0	0.0	0.0	0.0	0.0	0.0	1.0	0.0	0.0	0.0	0.0	1.0	0.0	0.0	0.0	0.0	0.0
LY6G5B	58496	symbol	H. sapiens	58496	H. sapiens	0.0	0.0	0.0	0.0	0.0	0.0	0.0	0.0	0.0	0.0	0.0	0.0	0.0	0.0	0.0	0.0	0.0	0.0	0.0	0.0
LYAR	55646	symbol	H. sapiens	55646	H. sapiens	0.0	0.0	1.0	0.0	1.0	0.0	0.0	0.0	0.0	0.0	0.0	0.0	0.0	0.0	0.0	0.0	0.0	0.0	0.0	0.0
LYST	1130	symbol	H. sapiens	1130	H. sapiens	0.0	0.0	0.0	0.0	0.0	0.0	0.0	0.0	0.0	0.0	0.0	0.0	0.0	0.0	0.0	0.0	0.0	0.0	0.0	0.0
LZIC	84328	symbol	H. sapiens	84328	H. sapiens	0.0	0.0	0.0	0.0	0.0	0.0	0.0	0.0	0.0	0.0	0.0	0.0	0.0	0.0	0.0	0.0	0.0	0.0	0.0	0.0
LZTS2	84445	symbol	H. sapiens	84445	H. sapiens	0.0	0.0	0.0	0.0	0.0	0.0	0.0	0.0	0.0	0.0	0.0	0.0	0.0	0.0	0.0	0.0	1.0	0.0	0.0	0.0
MAFK	7975	symbol	H. sapiens	7975	H. sapiens	0.0	0.0	0.0	0.0	0.0	0.0	0.0	0.0	0.0	0.0	0.0	0.0	0.0	0.0	0.0	0.0	0.0	0.0	0.0	0.0
MAK16	84549	symbol	H. sapiens	84549	H. sapiens	1.0	0.0	0.0	0.0	1.0	0.0	0.0	0.0	0.0	0.0	0.0	0.0	0.0	0.0	0.0	0.0	0.0	0.0	0.0	0.0
MAOB	4129	symbol	H. sapiens	4129	H. sapiens	0.0	0.0	0.0	0.0	0.0	0.0	0.0	1.0	0.0	0.0	0.0	0.0	0.0	0.0	0.0	0.0	0.0	0.0	0.0	0.0
MAP10	54627	symbol	H. sapiens	54627	H. sapiens	0.0	0.0	0.0	0.0	0.0	0.0	0.0	0.0	0.0	0.0	0.0	0.0	0.0	0.0	0.0	0.0	1.0	0.0	0.0	0.0
MAP2K4	6416	symbol	H. sapiens	6416	H. sapiens	0.0	0.0	0.0	0.0	0.0	0.0	0.0	0.0	0.0	0.0	0.0	0.0	0.0	0.0	0.0	0.0	0.0	0.0	0.0	0.0
MAP3K4	4216	symbol	H. sapiens	4216	H. sapiens	0.0	0.0	0.0	0.0	0.0	0.0	0.0	0.0	1.0	0.0	0.0	0.0	0.0	0.0	0.0	1.0	0.0	1.0	0.0	0.0
MAP4	4134	symbol	H. sapiens	4134	H. sapiens	0.0	0.0	0.0	0.0	0.0	0.0	0.0	0.0	0.0	0.0	0.0	0.0	0.0	0.0	0.0	0.0	1.0	0.0	0.0	0.0
MAPRE1	22919	symbol	H. sapiens	22919	H. sapiens	0.0	0.0	0.0	0.0	0.0	0.0	0.0	0.0	0.0	0.0	0.0	0.0	0.0	0.0	0.0	0.0	1.0	0.0	0.0	0.0
MAST3	23031	symbol	H. sapiens	23031	H. sapiens	0.0	0.0	0.0	0.0	0.0	0.0	0.0	0.0	0.0	0.0	0.0	0.0	0.0	0.0	0.0	0.0	0.0	0.0	0.0	0.0
MAST4	375449	symbol	H. sapiens	375449	H. sapiens	0.0	0.0	0.0	0.0	0.0	0.0	0.0	0.0	0.0	0.0	0.0	0.0	0.0	0.0	0.0	0.0	0.0	0.0	0.0	0.0
MAT2B	27430	symbol	H. sapiens	27430	H. sapiens	0.0	0.0	0.0	0.0	0.0	0.0	0.0	0.0	0.0	0.0	0.0	0.0	1.0	0.0	0.0	0.0	0.0	0.0	0.0	0.0
MBD6	114785	symbol	H. sapiens	114785	H. sapiens	0.0	0.0	0.0	0.0	0.0	0.0	0.0	0.0	0.0	0.0	0.0	0.0	0.0	0.0	0.0	0.0	0.0	0.0	0.0	0.0
MCAT	27349	symbol	H. sapiens	27349	H. sapiens	0.0	0.0	0.0	0.0	0.0	0.0	0.0	1.0	0.0	0.0	0.0	0.0	0.0	0.0	0.0	0.0	0.0	0.0	0.0	0.0
MCCC2	64087	symbol	H. sapiens	64087	H. sapiens	0.0	0.0	0.0	0.0	0.0	0.0	0.0	1.0	0.0	0.0	0.0	0.0	0.0	0.0	0.0	0.0	0.0	0.0	0.0	0.0
MCL1	4170	symbol	H. sapiens	4170	H. sapiens	0.0	0.0	0.0	0.0	0.0	0.0	0.0	1.0	1.0	0.0	0.0	1.0	0.0	0.0	0.0	1.0	0.0	0.0	1.0	0.0
MCMBP	79892	symbol	H. sapiens	79892	H. sapiens	0.0	0.0	0.0	0.0	0.0	0.0	0.0	0.0	0.0	0.0	0.0	0.0	0.0	0.0	0.0	0.0	1.0	0.0	0.0	0.0
MED11	400569	symbol	H. sapiens	400569	H. sapiens	0.0	0.0	1.0	0.0	0.0	0.0	0.0	0.0	0.0	0.0	1.0	0.0	1.0	1.0	0.0	0.0	0.0	0.0	0.0	0.0
MED28	80306	symbol	H. sapiens	80306	H. sapiens	0.0	0.0	1.0	0.0	0.0	0.0	0.0	0.0	0.0	0.0	0.0	0.0	0.0	0.0	0.0	0.0	0.0	0.0	0.0	0.0
MED29	55588	symbol	H. sapiens	55588	H. sapiens	0.0	0.0	1.0	0.0	0.0	0.0	0.0	0.0	0.0	0.0	1.0	0.0	0.0	0.0	0.0	0.0	0.0	0.0	0.0	0.0
MET	4233	symbol	H. sapiens	4233	H. sapiens	0.0	0.0	0.0	0.0	0.0	0.0	0.0	0.0	1.0	0.0	0.0	0.0	0.0	0.0	0.0	1.0	0.0	1.0	0.0	0.0
METTL21EP	121952	symbol	H. sapiens	121952	H. sapiens	0.0	0.0	0.0	0.0	0.0	0.0	1.0	0.0	0.0	0.0	0.0	0.0	0.0	0.0	0.0	0.0	0.0	0.0	0.0	0.0
METTL23	124512	symbol	H. sapiens	124512	H. sapiens	0.0	0.0	1.0	0.0	0.0	0.0	1.0	0.0	0.0	0.0	0.0	0.0	0.0	0.0	0.0	0.0	0.0	0.0	0.0	0.0
METTL25	84190	symbol	H. sapiens	84190	H. sapiens	0.0	0.0	0.0	0.0	0.0	0.0	1.0	0.0	0.0	0.0	0.0	0.0	0.0	0.0	0.0	0.0	0.0	0.0	0.0	0.0
MFSD1	64747	symbol	H. sapiens	64747	H. sapiens	0.0	0.0	0.0	0.0	0.0	0.0	0.0	0.0	0.0	0.0	0.0	0.0	0.0	0.0	0.0	0.0	0.0	0.0	1.0	0.0
MGST2	4258	symbol	H. sapiens	4258	H. sapiens	0.0	0.0	0.0	0.0	0.0	0.0	0.0	0.0	0.0	0.0	0.0	0.0	0.0	0.0	0.0	0.0	0.0	0.0	0.0	0.0
MICA	100507436	symbol	H. sapiens	100507436	H. sapiens	0.0	0.0	0.0	0.0	0.0	0.0	0.0	0.0	0.0	0.0	0.0	1.0	0.0	0.0	0.0	0.0	0.0	0.0	0.0	0.0
MICAL3	57553	symbol	H. sapiens	57553	H. sapiens	0.0	0.0	0.0	0.0	0.0	0.0	0.0	0.0	0.0	0.0	0.0	0.0	0.0	0.0	0.0	0.0	1.0	0.0	0.0	0.0
MIR192	406967	symbol	H. sapiens	406967	H. sapiens	0.0	0.0	0.0	0.0	0.0	0.0	0.0	0.0	0.0	0.0	0.0	0.0	0.0	0.0	0.0	0.0	0.0	0.0	0.0	0.0
MIR21	406991	symbol	H. sapiens	406991	H. sapiens	0.0	0.0	0.0	0.0	0.0	0.0	0.0	0.0	1.0	1.0	0.0	0.0	0.0	0.0	1.0	1.0	0.0	1.0	0.0	0.0
MIR24-2	407013	symbol	H. sapiens	407013	H. sapiens	0.0	0.0	0.0	0.0	0.0	0.0	0.0	0.0	0.0	0.0	0.0	0.0	0.0	0.0	0.0	0.0	0.0	0.0	0.0	0.0
MIR30C2	407032	symbol	H. sapiens	407032	H. sapiens	0.0	0.0	0.0	0.0	0.0	0.0	0.0	0.0	1.0	0.0	0.0	0.0	0.0	0.0	0.0	0.0	0.0	0.0	0.0	0.0
MIR30E	407034	symbol	H. sapiens	407034	H. sapiens	0.0	0.0	0.0	0.0	0.0	0.0	0.0	0.0	0.0	0.0	0.0	0.0	0.0	0.0	0.0	0.0	0.0	0.0	0.0	0.0
MIR320C1	100302135	symbol	H. sapiens	100302135	H. sapiens	1.0	0.0	0.0	0.0	0.0	0.0	0.0	0.0	0.0	0.0	0.0	0.0	0.0	0.0	0.0	0.0	0.0	0.0	0.0	0.0
MIR99A	407055	symbol	H. sapiens	407055	H. sapiens	0.0	0.0	0.0	0.0	0.0	0.0	0.0	0.0	0.0	0.0	0.0	0.0	0.0	0.0	0.0	0.0	0.0	0.0	0.0	0.0
MIRLET7BHG	400931	symbol	H. sapiens	400931	H. sapiens	0.0	0.0	0.0	0.0	0.0	0.0	0.0	0.0	0.0	0.0	0.0	0.0	0.0	0.0	0.0	0.0	0.0	0.0	0.0	0.0
MIRLET7C	406885	symbol	H. sapiens	406885	H. sapiens	0.0	0.0	0.0	0.0	0.0	0.0	0.0	0.0	0.0	0.0	0.0	0.0	0.0	0.0	0.0	0.0	0.0	0.0	0.0	0.0
MIRLET7G	406890	symbol	H. sapiens	406890	H. sapiens	0.0	0.0	0.0	0.0	0.0	0.0	0.0	0.0	1.0	0.0	0.0	0.0	0.0	0.0	0.0	0.0	0.0	0.0	0.0	0.0
MKI67	4288	symbol	H. sapiens	4288	H. sapiens	0.0	0.0	0.0	0.0	0.0	0.0	0.0	0.0	0.0	0.0	0.0	0.0	0.0	0.0	0.0	0.0	0.0	0.0	0.0	0.0
MLLT10	8028	symbol	H. sapiens	8028	H. sapiens	0.0	0.0	0.0	0.0	0.0	0.0	0.0	0.0	0.0	0.0	0.0	0.0	0.0	0.0	0.0	0.0	0.0	0.0	0.0	0.0
MLLT6	4302	symbol	H. sapiens	4302	H. sapiens	0.0	0.0	0.0	0.0	0.0	0.0	0.0	0.0	1.0	0.0	0.0	0.0	0.0	0.0	0.0	0.0	0.0	0.0	0.0	1.0
MLYCD	23417	symbol	H. sapiens	23417	H. sapiens	0.0	1.0	0.0	0.0	0.0	0.0	0.0	1.0	0.0	0.0	0.0	0.0	0.0	0.0	0.0	0.0	0.0	0.0	0.0	0.0
MMAA	166785	symbol	H. sapiens	166785	H. sapiens	0.0	0.0	0.0	0.0	0.0	0.0	0.0	1.0	0.0	0.0	0.0	0.0	0.0	0.0	0.0	0.0	0.0	0.0	1.0	0.0
MOAP1	64112	symbol	H. sapiens	64112	H. sapiens	0.0	0.0	0.0	0.0	0.0	0.0	0.0	1.0	0.0	1.0	0.0	1.0	0.0	0.0	0.0	0.0	0.0	0.0	0.0	0.0
MORN1	79906	symbol	H. sapiens	79906	H. sapiens	0.0	0.0	0.0	0.0	0.0	0.0	0.0	0.0	0.0	0.0	0.0	0.0	0.0	0.0	0.0	0.0	0.0	0.0	0.0	0.0
MPHOSPH10	10199	symbol	H. sapiens	10199	H. sapiens	1.0	0.0	0.0	0.0	1.0	0.0	0.0	0.0	0.0	0.0	0.0	0.0	0.0	0.0	0.0	0.0	0.0	0.0	0.0	0.0
MPHOSPH9	10198	symbol	H. sapiens	10198	H. sapiens	0.0	0.0	0.0	0.0	0.0	0.0	0.0	0.0	0.0	0.0	0.0	0.0	0.0	0.0	0.0	0.0	0.0	0.0	0.0	0.0
MPI	4351	symbol	H. sapiens	4351	H. sapiens	0.0	1.0	0.0	0.0	0.0	0.0	0.0	0.0	0.0	0.0	0.0	0.0	0.0	0.0	0.0	0.0	0.0	0.0	0.0	0.0
MRC1	4360	symbol	H. sapiens	4360	H. sapiens	0.0	0.0	0.0	0.0	0.0	0.0	0.0	0.0	0.0	0.0	0.0	0.0	0.0	0.0	0.0	0.0	0.0	0.0	0.0	0.0
MRFAP1	93621	symbol	H. sapiens	93621	H. sapiens	0.0	0.0	0.0	0.0	0.0	0.0	0.0	0.0	0.0	0.0	0.0	0.0	0.0	0.0	0.0	0.0	0.0	0.0	0.0	0.0
MRPL16	54948	symbol	H. sapiens	54948	H. sapiens	1.0	0.0	0.0	0.0	0.0	0.0	0.0	1.0	0.0	0.0	0.0	0.0	0.0	0.0	0.0	0.0	0.0	0.0	0.0	0.0
MRPL20	55052	symbol	H. sapiens	55052	H. sapiens	1.0	0.0	0.0	0.0	1.0	0.0	0.0	1.0	0.0	0.0	0.0	0.0	0.0	0.0	0.0	0.0	0.0	0.0	0.0	0.0
MRPL37	51253	symbol	H. sapiens	51253	H. sapiens	1.0	0.0	0.0	0.0	0.0	0.0	0.0	1.0	0.0	0.0	0.0	0.0	0.0	0.0	0.0	0.0	0.0	0.0	0.0	0.0
MRPL38	64978	symbol	H. sapiens	64978	H. sapiens	1.0	0.0	0.0	0.0	0.0	0.0	0.0	1.0	0.0	0.0	0.0	0.0	0.0	0.0	0.0	0.0	0.0	0.0	0.0	0.0
MRPL4	51073	symbol	H. sapiens	51073	H. sapiens	1.0	0.0	0.0	0.0	0.0	0.0	0.0	1.0	0.0	0.0	0.0	0.0	0.0	0.0	0.0	0.0	0.0	0.0	0.0	0.0
MRPL40	64976	symbol	H. sapiens	64976	H. sapiens	1.0	0.0	0.0	0.0	0.0	0.0	0.0	1.0	0.0	0.0	0.0	0.0	0.0	0.0	0.0	0.0	0.0	0.0	0.0	0.0
MRPL44	65080	symbol	H. sapiens	65080	H. sapiens	1.0	0.0	0.0	0.0	1.0	0.0	0.0	1.0	0.0	0.0	0.0	0.0	0.0	0.0	0.0	0.0	0.0	0.0	0.0	0.0
MRPL58	3396	symbol	H. sapiens	3396	H. sapiens	1.0	0.0	0.0	0.0	0.0	0.0	0.0	1.0	0.0	0.0	0.0	0.0	0.0	0.0	0.0	0.0	0.0	0.0	0.0	0.0
MRPS2	51116	symbol	H. sapiens	51116	H. sapiens	1.0	0.0	0.0	0.0	1.0	0.0	0.0	1.0	0.0	0.0	0.0	0.0	0.0	0.0	0.0	0.0	0.0	0.0	0.0	0.0
MRPS26	64949	symbol	H. sapiens	64949	H. sapiens	1.0	0.0	0.0	0.0	0.0	0.0	0.0	1.0	0.0	0.0	0.0	0.0	0.0	0.0	0.0	0.0	0.0	0.0	0.0	0.0
MRPS34	65993	symbol	H. sapiens	65993	H. sapiens	1.0	0.0	0.0	0.0	0.0	0.0	0.0	1.0	0.0	0.0	0.0	0.0	0.0	0.0	0.0	0.0	0.0	0.0	0.0	0.0
MRPS35	60488	symbol	H. sapiens	60488	H. sapiens	1.0	0.0	0.0	0.0	0.0	0.0	0.0	1.0	0.0	0.0	0.0	0.0	0.0	0.0	0.0	0.0	0.0	0.0	0.0	0.0
MRPS7	51081	symbol	H. sapiens	51081	H. sapiens	1.0	0.0	0.0	0.0	1.0	0.0	0.0	1.0	0.0	0.0	0.0	0.0	0.0	0.0	0.0	0.0	0.0	0.0	0.0	0.0
MSANTD2	79684	symbol	H. sapiens	79684	H. sapiens	0.0	0.0	0.0	0.0	0.0	0.0	0.0	0.0	0.0	0.0	0.0	0.0	0.0	0.0	0.0	0.0	0.0	0.0	0.0	0.0
MSL1	339287	symbol	H. sapiens	339287	H. sapiens	0.0	0.0	0.0	1.0	0.0	1.0	1.0	0.0	0.0	0.0	0.0	0.0	1.0	0.0	0.0	0.0	0.0	0.0	0.0	0.0
MSL2	55167	symbol	H. sapiens	55167	H. sapiens	0.0	0.0	0.0	0.0	0.0	0.0	1.0	0.0	0.0	0.0	0.0	0.0	1.0	1.0	0.0	0.0	0.0	0.0	0.0	0.0
MSN	4478	symbol	H. sapiens	4478	H. sapiens	0.0	0.0	0.0	0.0	0.0	0.0	0.0	0.0	0.0	1.0	0.0	0.0	0.0	0.0	0.0	0.0	0.0	0.0	0.0	0.0
MSS51	118490	symbol	H. sapiens	118490	H. sapiens	0.0	0.0	0.0	0.0	0.0	0.0	0.0	0.0	0.0	0.0	0.0	0.0	0.0	0.0	0.0	0.0	0.0	0.0	0.0	0.0
MTA2	9219	symbol	H. sapiens	9219	H. sapiens	0.0	0.0	1.0	1.0	0.0	0.0	1.0	0.0	0.0	0.0	1.0	1.0	0.0	0.0	0.0	0.0	0.0	0.0	0.0	0.0
MTCH1	23787	symbol	H. sapiens	23787	H. sapiens	0.0	0.0	0.0	0.0	0.0	0.0	0.0	1.0	0.0	1.0	0.0	0.0	0.0	0.0	0.0	0.0	0.0	0.0	0.0	0.0
MTDH	92140	symbol	H. sapiens	92140	H. sapiens	0.0	0.0	1.0	0.0	0.0	0.0	0.0	0.0	0.0	1.0	1.0	0.0	0.0	0.0	0.0	0.0	0.0	0.0	0.0	0.0
MTHFD1	4522	symbol	H. sapiens	4522	H. sapiens	0.0	1.0	0.0	0.0	0.0	0.0	0.0	0.0	0.0	0.0	0.0	0.0	0.0	0.0	0.0	0.0	0.0	0.0	0.0	0.0
MTHFR	4524	symbol	H. sapiens	4524	H. sapiens	0.0	0.0	0.0	1.0	0.0	0.0	0.0	0.0	0.0	0.0	0.0	0.0	0.0	0.0	0.0	0.0	0.0	0.0	0.0	1.0
MTMR14	64419	symbol	H. sapiens	64419	H. sapiens	0.0	0.0	0.0	0.0	0.0	0.0	0.0	0.0	0.0	0.0	0.0	0.0	0.0	0.0	0.0	0.0	0.0	0.0	0.0	0.0
MTMR9LP	339483	symbol	H. sapiens	339483	H. sapiens	0.0	0.0	0.0	0.0	0.0	0.0	0.0	0.0	0.0	0.0	0.0	0.0	0.0	0.0	0.0	0.0	0.0	0.0	0.0	0.0
MTX2	10651	symbol	H. sapiens	10651	H. sapiens	0.0	0.0	0.0	0.0	0.0	0.0	0.0	1.0	0.0	0.0	0.0	0.0	0.0	0.0	0.0	0.0	0.0	0.0	0.0	0.0
MUC20	200958	symbol	H. sapiens	200958	H. sapiens	0.0	0.0	0.0	0.0	0.0	0.0	0.0	0.0	0.0	0.0	0.0	0.0	0.0	0.0	0.0	0.0	0.0	0.0	0.0	0.0
MUL1	79594	symbol	H. sapiens	79594	H. sapiens	0.0	0.0	0.0	0.0	0.0	0.0	1.0	1.0	1.0	1.0	0.0	0.0	0.0	1.0	0.0	0.0	1.0	0.0	0.0	0.0
MUT	4594	gene_synonym	H. sapiens	4594	H. sapiens	0.0	0.0	0.0	0.0	0.0	0.0	0.0	1.0	0.0	0.0	0.0	0.0	0.0	0.0	0.0	0.0	0.0	0.0	1.0	0.0
MVB12B	89853	symbol	H. sapiens	89853	H. sapiens	0.0	0.0	0.0	0.0	0.0	0.0	0.0	0.0	0.0	0.0	0.0	0.0	0.0	1.0	0.0	0.0	0.0	0.0	0.0	0.0
MXI1	4601	symbol	H. sapiens	4601	H. sapiens	0.0	0.0	1.0	0.0	0.0	0.0	0.0	0.0	0.0	0.0	0.0	0.0	0.0	0.0	0.0	0.0	0.0	0.0	0.0	0.0
MYBBP1A	10514	symbol	H. sapiens	10514	H. sapiens	0.0	0.0	1.0	0.0	1.0	0.0	0.0	0.0	0.0	0.0	1.0	0.0	0.0	0.0	0.0	0.0	0.0	0.0	0.0	0.0
MYBL1	4603	symbol	H. sapiens	4603	H. sapiens	0.0	0.0	1.0	0.0	1.0	0.0	0.0	0.0	0.0	0.0	0.0	0.0	0.0	0.0	0.0	0.0	1.0	0.0	0.0	0.0
MYC	4609	symbol	H. sapiens	4609	H. sapiens	0.0	1.0	1.0	1.0	0.0	0.0	0.0	0.0	1.0	1.0	0.0	1.0	0.0	0.0	0.0	1.0	1.0	1.0	0.0	0.0
MYDGF	56005	symbol	H. sapiens	56005	H. sapiens	0.0	0.0	0.0	0.0	0.0	0.0	0.0	0.0	0.0	0.0	0.0	0.0	0.0	0.0	0.0	0.0	0.0	1.0	0.0	0.0
MYSM1	114803	symbol	H. sapiens	114803	H. sapiens	0.0	0.0	0.0	1.0	0.0	0.0	1.0	0.0	0.0	0.0	1.0	0.0	0.0	0.0	0.0	0.0	0.0	0.0	0.0	0.0
N4BP2L2	10443	symbol	H. sapiens	10443	H. sapiens	0.0	0.0	1.0	0.0	0.0	0.0	0.0	0.0	0.0	0.0	1.0	0.0	0.0	0.0	0.0	0.0	0.0	0.0	0.0	0.0
NAB1	4664	symbol	H. sapiens	4664	H. sapiens	0.0	0.0	1.0	0.0	0.0	0.0	0.0	0.0	0.0	0.0	1.0	0.0	0.0	0.0	0.0	0.0	0.0	0.0	0.0	0.0
NAB2	4665	symbol	H. sapiens	4665	H. sapiens	0.0	0.0	1.0	0.0	0.0	0.0	0.0	0.0	0.0	0.0	1.0	0.0	0.0	0.0	0.0	0.0	0.0	1.0	0.0	0.0
NADSYN1	55191	symbol	H. sapiens	55191	H. sapiens	0.0	1.0	0.0	0.0	0.0	0.0	0.0	0.0	0.0	0.0	0.0	0.0	0.0	0.0	0.0	0.0	0.0	0.0	0.0	0.0
NAIP	4671	symbol	H. sapiens	4671	H. sapiens	0.0	0.0	0.0	0.0	0.0	0.0	0.0	0.0	1.0	1.0	0.0	0.0	0.0	0.0	0.0	1.0	0.0	0.0	0.0	0.0
NAMPT	10135	symbol	H. sapiens	10135	H. sapiens	0.0	1.0	0.0	0.0	0.0	1.0	0.0	0.0	0.0	0.0	0.0	0.0	0.0	0.0	0.0	0.0	0.0	0.0	0.0	0.0
NAPA	8775	symbol	H. sapiens	8775	H. sapiens	0.0	0.0	0.0	0.0	0.0	0.0	0.0	0.0	0.0	0.0	0.0	0.0	0.0	0.0	0.0	0.0	0.0	0.0	0.0	0.0
NAPB	63908	symbol	H. sapiens	63908	H. sapiens	0.0	0.0	0.0	0.0	0.0	0.0	0.0	0.0	0.0	0.0	0.0	0.0	0.0	0.0	0.0	0.0	0.0	0.0	0.0	0.0
NAPG	8774	symbol	H. sapiens	8774	H. sapiens	0.0	0.0	0.0	0.0	0.0	0.0	0.0	0.0	0.0	0.0	0.0	0.0	0.0	0.0	0.0	0.0	0.0	0.0	0.0	0.0
NAXD	55739	symbol	H. sapiens	55739	H. sapiens	0.0	1.0	0.0	0.0	0.0	0.0	0.0	1.0	0.0	0.0	0.0	0.0	0.0	0.0	0.0	0.0	0.0	0.0	0.0	0.0
NBN	4683	symbol	H. sapiens	4683	H. sapiens	0.0	0.0	1.0	0.0	0.0	0.0	0.0	0.0	0.0	0.0	0.0	1.0	0.0	0.0	0.0	1.0	1.0	1.0	0.0	0.0
NCBP2-AS2	152217	gene_synonym	H. sapiens	152217	H. sapiens	0.0	0.0	0.0	0.0	0.0	0.0	0.0	0.0	0.0	0.0	0.0	0.0	0.0	0.0	0.0	0.0	0.0	0.0	0.0	0.0
NCK1	4690	symbol	H. sapiens	4690	H. sapiens	0.0	0.0	0.0	0.0	0.0	0.0	0.0	0.0	1.0	0.0	0.0	0.0	0.0	0.0	1.0	1.0	0.0	0.0	0.0	0.0
NCOA6	23054	symbol	H. sapiens	23054	H. sapiens	0.0	1.0	1.0	0.0	0.0	0.0	0.0	0.0	0.0	0.0	1.0	1.0	1.0	0.0	0.0	0.0	0.0	0.0	0.0	0.0
NDUFAF2	91942	symbol	H. sapiens	91942	H. sapiens	0.0	0.0	0.0	0.0	0.0	0.0	0.0	1.0	0.0	0.0	0.0	0.0	0.0	0.0	0.0	0.0	0.0	0.0	0.0	0.0
NDUFS1	4719	symbol	H. sapiens	4719	H. sapiens	0.0	0.0	0.0	0.0	0.0	0.0	0.0	1.0	0.0	0.0	0.0	0.0	0.0	0.0	0.0	0.0	0.0	0.0	0.0	0.0
NECAB3	63941	symbol	H. sapiens	63941	H. sapiens	0.0	0.0	0.0	0.0	0.0	0.0	0.0	0.0	0.0	0.0	0.0	0.0	0.0	0.0	0.0	0.0	0.0	0.0	0.0	0.0
NEK1	4750	symbol	H. sapiens	4750	H. sapiens	0.0	0.0	0.0	0.0	0.0	0.0	0.0	0.0	0.0	0.0	0.0	0.0	0.0	0.0	0.0	0.0	1.0	0.0	0.0	0.0
NELFB	25920	symbol	H. sapiens	25920	H. sapiens	0.0	0.0	0.0	0.0	0.0	0.0	0.0	0.0	0.0	0.0	0.0	0.0	0.0	0.0	0.0	0.0	0.0	0.0	0.0	0.0
NELFCD	51497	symbol	H. sapiens	51497	H. sapiens	0.0	0.0	0.0	0.0	0.0	0.0	0.0	0.0	0.0	0.0	0.0	0.0	0.0	0.0	0.0	0.0	0.0	0.0	0.0	0.0
NENF	29937	symbol	H. sapiens	29937	H. sapiens	0.0	0.0	0.0	0.0	0.0	0.0	0.0	0.0	0.0	0.0	0.0	0.0	0.0	0.0	0.0	0.0	0.0	0.0	0.0	0.0
NFAT5	10725	symbol	H. sapiens	10725	H. sapiens	0.0	1.0	1.0	0.0	0.0	0.0	0.0	0.0	0.0	0.0	0.0	0.0	0.0	0.0	0.0	0.0	0.0	0.0	0.0	0.0
NFE2L2	4780	symbol	H. sapiens	4780	H. sapiens	0.0	0.0	1.0	0.0	0.0	0.0	0.0	0.0	1.0	1.0	0.0	0.0	0.0	1.0	1.0	1.0	0.0	0.0	0.0	0.0
NFU1	27247	symbol	H. sapiens	27247	H. sapiens	0.0	0.0	0.0	0.0	0.0	0.0	0.0	0.0	0.0	0.0	0.0	0.0	0.0	0.0	0.0	0.0	0.0	0.0	0.0	0.0
NHP2	55651	symbol	H. sapiens	55651	H. sapiens	1.0	1.0	0.0	0.0	1.0	0.0	0.0	0.0	0.0	0.0	0.0	1.0	0.0	0.0	0.0	0.0	0.0	0.0	0.0	0.0
NHSL1	57224	symbol	H. sapiens	57224	H. sapiens	0.0	0.0	0.0	0.0	0.0	0.0	0.0	0.0	0.0	0.0	0.0	0.0	0.0	0.0	0.0	0.0	0.0	0.0	0.0	0.0
NIP7	51388	symbol	H. sapiens	51388	H. sapiens	1.0	0.0	0.0	0.0	1.0	0.0	0.0	0.0	0.0	0.0	0.0	0.0	0.0	0.0	0.0	0.0	0.0	0.0	0.0	0.0
NIPAL1	152519	symbol	H. sapiens	152519	H. sapiens	0.0	0.0	0.0	0.0	0.0	0.0	0.0	0.0	0.0	0.0	0.0	0.0	0.0	0.0	0.0	0.0	0.0	0.0	0.0	0.0
NKAPP1	158801	symbol	H. sapiens	158801	H. sapiens	0.0	0.0	0.0	0.0	0.0	0.0	0.0	0.0	0.0	0.0	0.0	0.0	0.0	0.0	0.0	0.0	0.0	0.0	0.0	0.0
NMRAL1	57407	symbol	H. sapiens	57407	H. sapiens	0.0	0.0	0.0	0.0	0.0	0.0	0.0	0.0	0.0	0.0	0.0	0.0	0.0	0.0	0.0	0.0	0.0	0.0	0.0	0.0
NMT1	4836	symbol	H. sapiens	4836	H. sapiens	0.0	0.0	0.0	0.0	0.0	0.0	0.0	0.0	0.0	0.0	0.0	0.0	0.0	0.0	0.0	0.0	0.0	0.0	0.0	0.0
NNMT	4837	symbol	H. sapiens	4837	H. sapiens	0.0	1.0	0.0	0.0	0.0	0.0	1.0	0.0	0.0	0.0	0.0	0.0	0.0	0.0	0.0	0.0	0.0	0.0	0.0	1.0
NOB1	28987	symbol	H. sapiens	28987	H. sapiens	1.0	0.0	0.0	0.0	1.0	0.0	0.0	0.0	0.0	0.0	0.0	0.0	0.0	0.0	0.0	0.0	0.0	0.0	0.0	0.0
NOC2LP2	401010	symbol	H. sapiens	401010	H. sapiens	0.0	0.0	0.0	0.0	0.0	0.0	0.0	0.0	0.0	0.0	0.0	0.0	0.0	0.0	0.0	0.0	0.0	0.0	0.0	0.0
NOL12	79159	symbol	H. sapiens	79159	H. sapiens	0.0	0.0	0.0	0.0	0.0	0.0	0.0	0.0	0.0	0.0	0.0	0.0	0.0	0.0	0.0	0.0	0.0	0.0	0.0	0.0
NPFF	8620	symbol	H. sapiens	8620	H. sapiens	0.0	0.0	0.0	0.0	0.0	0.0	0.0	0.0	0.0	0.0	0.0	0.0	0.0	0.0	0.0	0.0	0.0	0.0	0.0	0.0
NPL	80896	symbol	H. sapiens	80896	H. sapiens	0.0	0.0	0.0	0.0	0.0	0.0	0.0	0.0	0.0	0.0	0.0	0.0	0.0	0.0	0.0	0.0	0.0	0.0	0.0	0.0
NPR1	4881	symbol	H. sapiens	4881	H. sapiens	0.0	1.0	0.0	0.0	0.0	0.0	0.0	0.0	0.0	0.0	0.0	0.0	0.0	0.0	0.0	0.0	0.0	0.0	0.0	0.0
NPRL2	10641	symbol	H. sapiens	10641	H. sapiens	0.0	0.0	0.0	0.0	0.0	0.0	0.0	0.0	1.0	1.0	0.0	0.0	0.0	0.0	0.0	0.0	0.0	1.0	0.0	0.0
NR1H2	7376	symbol	H. sapiens	7376	H. sapiens	0.0	0.0	1.0	0.0	0.0	0.0	0.0	0.0	0.0	1.0	0.0	0.0	0.0	0.0	0.0	1.0	0.0	0.0	0.0	0.0
NR4A1	3164	symbol	H. sapiens	3164	H. sapiens	0.0	0.0	1.0	0.0	0.0	0.0	0.0	0.0	1.0	1.0	0.0	0.0	0.0	0.0	0.0	0.0	0.0	0.0	0.0	0.0
NR4A2	4929	symbol	H. sapiens	4929	H. sapiens	0.0	1.0	1.0	0.0	0.0	1.0	0.0	0.0	0.0	0.0	0.0	0.0	0.0	0.0	0.0	0.0	0.0	0.0	0.0	0.0
NSD1	64324	symbol	H. sapiens	64324	H. sapiens	0.0	0.0	1.0	1.0	0.0	0.0	1.0	0.0	0.0	0.0	1.0	0.0	0.0	0.0	0.0	0.0	0.0	0.0	0.0	1.0
NSMCE3	56160	symbol	H. sapiens	56160	H. sapiens	0.0	0.0	0.0	0.0	0.0	0.0	0.0	0.0	0.0	0.0	0.0	1.0	1.0	0.0	0.0	0.0	0.0	0.0	0.0	0.0
NT5C3B	115024	symbol	H. sapiens	115024	H. sapiens	1.0	0.0	0.0	0.0	0.0	0.0	0.0	0.0	0.0	1.0	0.0	0.0	0.0	0.0	1.0	0.0	0.0	0.0	0.0	0.0
NTMT1	28989	symbol	H. sapiens	28989	H. sapiens	0.0	0.0	0.0	0.0	0.0	0.0	1.0	0.0	0.0	0.0	0.0	0.0	0.0	0.0	0.0	0.0	1.0	0.0	0.0	0.0
NUBP2	10101	symbol	H. sapiens	10101	H. sapiens	0.0	0.0	0.0	0.0	0.0	0.0	0.0	0.0	0.0	0.0	0.0	0.0	0.0	0.0	0.0	0.0	0.0	0.0	0.0	0.0
NUCB1	4924	symbol	H. sapiens	4924	H. sapiens	0.0	0.0	0.0	0.0	0.0	0.0	0.0	0.0	0.0	0.0	0.0	0.0	0.0	0.0	0.0	0.0	0.0	0.0	0.0	0.0
NUDC	10726	symbol	H. sapiens	10726	H. sapiens	0.0	0.0	0.0	0.0	0.0	0.0	0.0	0.0	0.0	0.0	0.0	0.0	0.0	0.0	0.0	0.0	1.0	0.0	0.0	0.0
NUDT16	131870	symbol	H. sapiens	131870	H. sapiens	1.0	0.0	0.0	0.0	1.0	0.0	0.0	0.0	0.0	0.0	0.0	0.0	0.0	0.0	0.0	0.0	0.0	0.0	1.0	0.0
NUMB	8650	symbol	H. sapiens	8650	H. sapiens	0.0	0.0	0.0	0.0	0.0	0.0	0.0	0.0	0.0	0.0	0.0	0.0	0.0	0.0	0.0	0.0	1.0	0.0	0.0	0.0
NUMBL	9253	symbol	H. sapiens	9253	H. sapiens	0.0	0.0	0.0	0.0	0.0	0.0	0.0	0.0	0.0	0.0	0.0	0.0	0.0	0.0	0.0	0.0	1.0	0.0	0.0	0.0
NUP210	23225	symbol	H. sapiens	23225	H. sapiens	0.0	0.0	0.0	0.0	0.0	0.0	0.0	0.0	0.0	0.0	0.0	0.0	0.0	0.0	0.0	0.0	0.0	0.0	0.0	0.0
NUP214	8021	symbol	H. sapiens	8021	H. sapiens	0.0	0.0	0.0	0.0	0.0	0.0	0.0	0.0	0.0	0.0	0.0	0.0	0.0	0.0	0.0	0.0	1.0	0.0	0.0	0.0
NUSAP1	51203	symbol	H. sapiens	51203	H. sapiens	0.0	0.0	0.0	0.0	0.0	0.0	0.0	0.0	0.0	0.0	0.0	0.0	0.0	0.0	0.0	0.0	1.0	0.0	0.0	0.0
NXN	64359	symbol	H. sapiens	64359	H. sapiens	0.0	0.0	0.0	0.0	0.0	0.0	0.0	0.0	1.0	0.0	0.0	0.0	0.0	0.0	0.0	0.0	0.0	0.0	0.0	0.0
NXT2	55916	symbol	H. sapiens	55916	H. sapiens	0.0	0.0	0.0	0.0	0.0	0.0	0.0	0.0	0.0	0.0	0.0	0.0	0.0	0.0	0.0	0.0	0.0	0.0	0.0	0.0
OAZ2	4947	symbol	H. sapiens	4947	H. sapiens	0.0	0.0	0.0	0.0	0.0	0.0	0.0	0.0	1.0	1.0	0.0	0.0	0.0	0.0	0.0	0.0	0.0	0.0	0.0	0.0
OCLM						nan	nan	nan	nan	nan	nan	nan	nan	nan	nan	nan	nan	nan	nan	nan	nan	nan	nan	nan	nan
ODC1	4953	symbol	H. sapiens	4953	H. sapiens	0.0	0.0	0.0	0.0	0.0	0.0	0.0	0.0	0.0	1.0	0.0	0.0	0.0	0.0	0.0	0.0	0.0	0.0	1.0	0.0
OGFOD3	79701	symbol	H. sapiens	79701	H. sapiens	0.0	0.0	0.0	0.0	0.0	0.0	0.0	0.0	0.0	0.0	0.0	0.0	0.0	0.0	0.0	0.0	0.0	0.0	0.0	0.0
OLIG2	10215	symbol	H. sapiens	10215	H. sapiens	0.0	0.0	0.0	0.0	0.0	0.0	0.0	0.0	0.0	0.0	0.0	0.0	0.0	0.0	0.0	0.0	0.0	0.0	0.0	0.0
OS9	10956	symbol	H. sapiens	10956	H. sapiens	0.0	0.0	0.0	0.0	0.0	0.0	0.0	0.0	0.0	0.0	0.0	0.0	1.0	1.0	0.0	0.0	0.0	0.0	0.0	0.0
OSBPL2	9885	symbol	H. sapiens	9885	H. sapiens	0.0	0.0	0.0	0.0	0.0	0.0	0.0	0.0	0.0	0.0	0.0	0.0	0.0	0.0	0.0	0.0	0.0	0.0	0.0	0.0
OTUD1	220213	symbol	H. sapiens	220213	H. sapiens	0.0	0.0	0.0	0.0	0.0	0.0	0.0	0.0	0.0	0.0	0.0	0.0	0.0	0.0	0.0	0.0	0.0	0.0	0.0	0.0
OXSM	54995	symbol	H. sapiens	54995	H. sapiens	0.0	0.0	0.0	0.0	0.0	0.0	0.0	0.0	0.0	0.0	0.0	0.0	0.0	0.0	0.0	0.0	0.0	0.0	0.0	0.0
P2RX4	5025	symbol	H. sapiens	5025	H. sapiens	0.0	0.0	0.0	0.0	0.0	0.0	0.0	1.0	0.0	0.0	0.0	0.0	0.0	0.0	0.0	0.0	0.0	0.0	0.0	0.0
PACSIN3	29763	symbol	H. sapiens	29763	H. sapiens	0.0	0.0	0.0	0.0	0.0	0.0	0.0	0.0	0.0	1.0	0.0	0.0	0.0	0.0	0.0	0.0	0.0	0.0	0.0	0.0
PALM3	342979	symbol	H. sapiens	342979	H. sapiens	0.0	0.0	0.0	0.0	0.0	0.0	0.0	0.0	0.0	0.0	0.0	0.0	0.0	0.0	0.0	0.0	0.0	0.0	0.0	0.0
PAN3	255967	symbol	H. sapiens	255967	H. sapiens	1.0	0.0	0.0	0.0	0.0	0.0	0.0	0.0	0.0	1.0	0.0	0.0	0.0	0.0	1.0	0.0	0.0	0.0	0.0	0.0
PANX1	24145	symbol	H. sapiens	24145	H. sapiens	0.0	0.0	0.0	0.0	0.0	0.0	0.0	0.0	0.0	0.0	0.0	0.0	0.0	0.0	0.0	0.0	0.0	0.0	0.0	0.0
PAPPA-AS1	493913	symbol	H. sapiens	493913	H. sapiens	0.0	0.0	0.0	0.0	0.0	0.0	0.0	0.0	0.0	0.0	0.0	0.0	0.0	0.0	0.0	0.0	0.0	0.0	0.0	0.0
PARD3B	117583	symbol	H. sapiens	117583	H. sapiens	0.0	0.0	0.0	0.0	0.0	0.0	0.0	0.0	0.0	0.0	0.0	0.0	0.0	0.0	0.0	0.0	1.0	0.0	0.0	0.0
PARGP1	728407	symbol	H. sapiens	728407	H. sapiens	0.0	0.0	0.0	0.0	0.0	0.0	0.0	0.0	0.0	0.0	0.0	0.0	0.0	0.0	0.0	0.0	0.0	0.0	0.0	0.0
PARK7	11315	symbol	H. sapiens	11315	H. sapiens	0.0	0.0	1.0	0.0	0.0	0.0	1.0	1.0	1.0	1.0	1.0	1.0	0.0	0.0	0.0	1.0	0.0	1.0	1.0	1.0
PARP1	142	symbol	H. sapiens	142	H. sapiens	0.0	1.0	1.0	0.0	0.0	0.0	0.0	0.0	1.0	0.0	0.0	1.0	0.0	0.0	0.0	1.0	0.0	0.0	0.0	0.0
PBDC1	51260	symbol	H. sapiens	51260	H. sapiens	0.0	0.0	0.0	0.0	0.0	0.0	0.0	0.0	0.0	0.0	0.0	0.0	0.0	0.0	0.0	0.0	0.0	0.0	0.0	0.0
PC	5091	symbol	H. sapiens	5091	H. sapiens	0.0	0.0	0.0	0.0	0.0	0.0	0.0	1.0	0.0	0.0	0.0	0.0	0.0	0.0	0.0	0.0	0.0	0.0	0.0	0.0
PCDHA4	56144	symbol	H. sapiens	56144	H. sapiens	0.0	0.0	0.0	0.0	0.0	0.0	0.0	0.0	0.0	0.0	0.0	0.0	0.0	0.0	0.0	0.0	0.0	0.0	0.0	0.0
PCED1A	64773	symbol	H. sapiens	64773	H. sapiens	0.0	0.0	0.0	0.0	0.0	0.0	0.0	0.0	0.0	0.0	0.0	0.0	0.0	0.0	0.0	0.0	0.0	0.0	0.0	0.0
PCGF3	10336	symbol	H. sapiens	10336	H. sapiens	0.0	0.0	0.0	1.0	0.0	0.0	1.0	0.0	0.0	0.0	0.0	0.0	1.0	1.0	0.0	0.0	0.0	0.0	0.0	0.0
PCGF5	84333	symbol	H. sapiens	84333	H. sapiens	0.0	0.0	0.0	1.0	0.0	0.0	1.0	0.0	0.0	0.0	0.0	0.0	1.0	1.0	0.0	0.0	0.0	0.0	0.0	0.0
PCGF6	84108	symbol	H. sapiens	84108	H. sapiens	0.0	0.0	0.0	0.0	0.0	0.0	1.0	0.0	0.0	0.0	0.0	0.0	1.0	1.0	0.0	0.0	0.0	0.0	0.0	0.0
PCID2	55795	symbol	H. sapiens	55795	H. sapiens	1.0	1.0	0.0	0.0	0.0	0.0	0.0	0.0	1.0	1.0	0.0	0.0	0.0	0.0	1.0	0.0	0.0	0.0	0.0	0.0
PCYT2	5833	symbol	H. sapiens	5833	H. sapiens	0.0	0.0	0.0	0.0	0.0	0.0	0.0	0.0	0.0	0.0	0.0	0.0	0.0	0.0	0.0	0.0	0.0	0.0	0.0	0.0
PDCD11	22984	symbol	H. sapiens	22984	H. sapiens	1.0	0.0	1.0	0.0	1.0	0.0	0.0	0.0	0.0	0.0	0.0	0.0	0.0	0.0	0.0	0.0	0.0	0.0	0.0	0.0
PDCD5	9141	symbol	H. sapiens	9141	H. sapiens	0.0	0.0	0.0	0.0	0.0	0.0	0.0	0.0	0.0	1.0	0.0	0.0	0.0	0.0	0.0	0.0	0.0	0.0	0.0	0.0
PDE4D	5144	symbol	H. sapiens	5144	H. sapiens	0.0	0.0	0.0	0.0	0.0	0.0	0.0	0.0	1.0	0.0	0.0	0.0	0.0	0.0	0.0	0.0	0.0	0.0	0.0	0.0
PDHA1	5160	symbol	H. sapiens	5160	H. sapiens	0.0	1.0	0.0	0.0	0.0	0.0	0.0	1.0	0.0	0.0	0.0	0.0	0.0	0.0	0.0	0.0	0.0	0.0	0.0	0.0
PDIA5	10954	symbol	H. sapiens	10954	H. sapiens	0.0	0.0	0.0	0.0	0.0	0.0	0.0	0.0	0.0	0.0	0.0	0.0	0.0	0.0	0.0	0.0	0.0	0.0	0.0	0.0
PDIA6	10130	symbol	H. sapiens	10130	H. sapiens	0.0	0.0	0.0	0.0	0.0	0.0	0.0	0.0	0.0	0.0	0.0	0.0	0.0	0.0	0.0	0.0	0.0	0.0	0.0	0.0
PDLIM5	10611	symbol	H. sapiens	10611	H. sapiens	0.0	0.0	0.0	0.0	0.0	0.0	0.0	0.0	0.0	0.0	0.0	0.0	0.0	0.0	0.0	0.0	0.0	0.0	0.0	0.0
PDPK1	5170	symbol	H. sapiens	5170	H. sapiens	0.0	0.0	0.0	0.0	0.0	0.0	0.0	0.0	1.0	0.0	0.0	0.0	0.0	0.0	0.0	0.0	0.0	1.0	0.0	0.0
PEAK1	79834	symbol	H. sapiens	79834	H. sapiens	0.0	0.0	0.0	0.0	0.0	0.0	0.0	0.0	0.0	0.0	0.0	0.0	0.0	0.0	0.0	0.0	0.0	0.0	0.0	0.0
PEBP1	5037	symbol	H. sapiens	5037	H. sapiens	0.0	0.0	0.0	0.0	0.0	0.0	0.0	0.0	1.0	1.0	0.0	0.0	0.0	0.0	0.0	0.0	0.0	0.0	0.0	0.0
PEX10	5192	symbol	H. sapiens	5192	H. sapiens	0.0	0.0	0.0	0.0	0.0	0.0	0.0	0.0	0.0	0.0	0.0	0.0	0.0	0.0	0.0	0.0	0.0	0.0	0.0	0.0
PEX5	5830	symbol	H. sapiens	5830	H. sapiens	0.0	0.0	0.0	0.0	0.0	0.0	0.0	0.0	0.0	0.0	0.0	0.0	0.0	0.0	0.0	0.0	0.0	0.0	0.0	0.0
PFDN2	5202	symbol	H. sapiens	5202	H. sapiens	0.0	0.0	0.0	0.0	0.0	0.0	0.0	0.0	0.0	0.0	0.0	0.0	0.0	0.0	0.0	0.0	0.0	0.0	0.0	0.0
PFN1	5216	symbol	H. sapiens	5216	H. sapiens	0.0	0.0	0.0	0.0	0.0	0.0	0.0	0.0	0.0	0.0	0.0	0.0	0.0	0.0	0.0	0.0	0.0	0.0	0.0	0.0
PFN1P2	767846	symbol	H. sapiens	767846	H. sapiens	0.0	0.0	0.0	0.0	0.0	0.0	0.0	0.0	0.0	0.0	0.0	0.0	0.0	0.0	0.0	0.0	0.0	0.0	0.0	0.0
PGD	5226	symbol	H. sapiens	5226	H. sapiens	0.0	0.0	0.0	0.0	0.0	0.0	0.0	0.0	0.0	0.0	0.0	0.0	0.0	0.0	0.0	0.0	0.0	0.0	0.0	0.0
PGRMC2	10424	symbol	H. sapiens	10424	H. sapiens	0.0	0.0	0.0	0.0	0.0	0.0	0.0	0.0	0.0	0.0	0.0	0.0	0.0	0.0	0.0	0.0	0.0	0.0	0.0	0.0
PHACTR4	65979	symbol	H. sapiens	65979	H. sapiens	0.0	0.0	0.0	0.0	0.0	0.0	0.0	0.0	0.0	0.0	0.0	0.0	0.0	0.0	0.0	0.0	0.0	0.0	0.0	0.0
PHC1	1911	symbol	H. sapiens	1911	H. sapiens	0.0	0.0	0.0	0.0	0.0	0.0	1.0	0.0	0.0	0.0	0.0	0.0	1.0	1.0	0.0	0.0	0.0	0.0	0.0	0.0
PHC3	80012	symbol	H. sapiens	80012	H. sapiens	0.0	0.0	0.0	0.0	0.0	0.0	0.0	0.0	0.0	0.0	0.0	0.0	1.0	0.0	0.0	0.0	0.0	0.0	0.0	0.0
PHF13	148479	symbol	H. sapiens	148479	H. sapiens	0.0	0.0	0.0	1.0	0.0	0.0	0.0	0.0	0.0	0.0	0.0	0.0	0.0	0.0	0.0	0.0	1.0	0.0	0.0	0.0
PHF21A	51317	symbol	H. sapiens	51317	H. sapiens	0.0	0.0	0.0	1.0	0.0	0.0	0.0	0.0	0.0	0.0	0.0	0.0	0.0	0.0	0.0	0.0	0.0	0.0	0.0	0.0
PHLDA1	22822	symbol	H. sapiens	22822	H. sapiens	0.0	0.0	0.0	0.0	0.0	0.0	0.0	0.0	0.0	0.0	0.0	0.0	0.0	0.0	0.0	0.0	0.0	0.0	0.0	0.0
PIAS3	10401	symbol	H. sapiens	10401	H. sapiens	0.0	0.0	0.0	0.0	0.0	1.0	1.0	0.0	1.0	0.0	1.0	0.0	0.0	1.0	0.0	0.0	0.0	0.0	0.0	0.0
PIEZO2	63895	symbol	H. sapiens	63895	H. sapiens	0.0	0.0	0.0	0.0	0.0	0.0	0.0	0.0	0.0	0.0	0.0	0.0	0.0	0.0	0.0	0.0	0.0	0.0	0.0	0.0
PIGF	5281	symbol	H. sapiens	5281	H. sapiens	0.0	0.0	0.0	0.0	0.0	0.0	0.0	0.0	0.0	0.0	0.0	0.0	0.0	0.0	0.0	0.0	0.0	0.0	0.0	0.0
PIH1D1	55011	symbol	H. sapiens	55011	H. sapiens	1.0	1.0	0.0	1.0	1.0	0.0	0.0	0.0	1.0	1.0	0.0	0.0	0.0	0.0	0.0	0.0	0.0	1.0	0.0	1.0
PIK3AP1	118788	symbol	H. sapiens	118788	H. sapiens	0.0	0.0	0.0	0.0	0.0	0.0	0.0	0.0	0.0	0.0	0.0	0.0	0.0	0.0	0.0	0.0	0.0	0.0	0.0	0.0
PIK3C2B	5287	symbol	H. sapiens	5287	H. sapiens	0.0	0.0	0.0	0.0	0.0	0.0	0.0	0.0	0.0	0.0	0.0	0.0	1.0	0.0	0.0	0.0	0.0	0.0	0.0	0.0
PIN1	5300	symbol	H. sapiens	5300	H. sapiens	0.0	0.0	0.0	0.0	0.0	1.0	0.0	0.0	1.0	1.0	0.0	0.0	0.0	0.0	1.0	0.0	0.0	1.0	0.0	0.0
PIWIL4	143689	symbol	H. sapiens	143689	H. sapiens	0.0	0.0	0.0	0.0	1.0	0.0	1.0	0.0	0.0	0.0	0.0	1.0	0.0	0.0	1.0	0.0	0.0	0.0	0.0	0.0
PKIG	11142	symbol	H. sapiens	11142	H. sapiens	0.0	0.0	0.0	0.0	0.0	0.0	0.0	0.0	1.0	0.0	0.0	0.0	0.0	0.0	0.0	0.0	0.0	1.0	0.0	0.0
PLEKHA4	57664	symbol	H. sapiens	57664	H. sapiens	0.0	0.0	0.0	0.0	0.0	0.0	0.0	0.0	0.0	0.0	0.0	0.0	0.0	0.0	0.0	0.0	0.0	0.0	0.0	0.0
PLEKHA7	144100	symbol	H. sapiens	144100	H. sapiens	0.0	0.0	0.0	0.0	0.0	0.0	0.0	0.0	0.0	0.0	0.0	0.0	0.0	0.0	0.0	0.0	0.0	0.0	0.0	0.0
PLEKHH1	57475	symbol	H. sapiens	57475	H. sapiens	0.0	0.0	0.0	0.0	0.0	0.0	0.0	0.0	0.0	0.0	0.0	0.0	0.0	0.0	0.0	0.0	0.0	0.0	0.0	0.0
PLEKHH2	130271	symbol	H. sapiens	130271	H. sapiens	0.0	0.0	0.0	0.0	0.0	0.0	0.0	0.0	0.0	0.0	0.0	0.0	0.0	0.0	0.0	0.0	0.0	0.0	0.0	0.0
PLK3	1263	symbol	H. sapiens	1263	H. sapiens	0.0	0.0	0.0	0.0	0.0	0.0	0.0	0.0	0.0	1.0	0.0	1.0	0.0	0.0	0.0	0.0	1.0	0.0	0.0	0.0
PLOD2	5352	symbol	H. sapiens	5352	H. sapiens	0.0	0.0	0.0	0.0	0.0	0.0	1.0	0.0	0.0	0.0	0.0	0.0	0.0	0.0	0.0	0.0	0.0	0.0	0.0	0.0
PLPP6	403313	symbol	H. sapiens	403313	H. sapiens	0.0	0.0	0.0	0.0	0.0	0.0	0.0	0.0	0.0	0.0	0.0	0.0	0.0	0.0	0.0	0.0	0.0	0.0	0.0	0.0
PLS1	5357	symbol	H. sapiens	5357	H. sapiens	0.0	0.0	0.0	0.0	0.0	0.0	0.0	0.0	0.0	0.0	0.0	0.0	0.0	0.0	0.0	0.0	0.0	0.0	0.0	0.0
PLSCR4	57088	symbol	H. sapiens	57088	H. sapiens	0.0	0.0	0.0	0.0	0.0	0.0	0.0	0.0	0.0	0.0	0.0	0.0	0.0	0.0	0.0	0.0	0.0	0.0	0.0	0.0
PMM1	5372	symbol	H. sapiens	5372	H. sapiens	0.0	1.0	0.0	0.0	0.0	0.0	0.0	0.0	0.0	0.0	0.0	0.0	0.0	0.0	0.0	0.0	0.0	0.0	0.0	0.0
PMPCA	23203	symbol	H. sapiens	23203	H. sapiens	0.0	0.0	0.0	0.0	0.0	0.0	0.0	1.0	0.0	0.0	0.0	0.0	0.0	0.0	0.0	0.0	0.0	0.0	0.0	0.0
PNISR	25957	symbol	H. sapiens	25957	H. sapiens	0.0	0.0	0.0	0.0	0.0	1.0	0.0	0.0	0.0	0.0	0.0	0.0	0.0	0.0	0.0	0.0	0.0	0.0	0.0	0.0
PNPLA8	50640	symbol	H. sapiens	50640	H. sapiens	0.0	0.0	0.0	0.0	0.0	0.0	0.0	1.0	0.0	0.0	0.0	0.0	0.0	0.0	0.0	1.0	0.0	0.0	0.0	0.0
PNRC2	55629	symbol	H. sapiens	55629	H. sapiens	1.0	0.0	0.0	0.0	0.0	0.0	0.0	0.0	0.0	0.0	0.0	0.0	0.0	0.0	1.0	0.0	0.0	0.0	0.0	0.0
POGK	57645	symbol	H. sapiens	57645	H. sapiens	0.0	0.0	0.0	0.0	0.0	0.0	0.0	0.0	0.0	0.0	0.0	0.0	0.0	0.0	0.0	0.0	0.0	0.0	0.0	0.0
POGZ	23126	symbol	H. sapiens	23126	H. sapiens	0.0	0.0	0.0	0.0	0.0	0.0	0.0	0.0	0.0	0.0	0.0	0.0	0.0	0.0	0.0	1.0	1.0	0.0	0.0	0.0
POLR1C	9533	symbol	H. sapiens	9533	H. sapiens	0.0	1.0	0.0	0.0	0.0	0.0	0.0	0.0	0.0	0.0	0.0	0.0	1.0	0.0	0.0	0.0	0.0	0.0	0.0	0.0
POLR1E	64425	symbol	H. sapiens	64425	H. sapiens	0.0	1.0	1.0	0.0	0.0	0.0	0.0	0.0	0.0	0.0	0.0	0.0	1.0	0.0	0.0	0.0	0.0	0.0	0.0	0.0
POLR2C	5432	symbol	H. sapiens	5432	H. sapiens	0.0	1.0	0.0	0.0	0.0	0.0	0.0	0.0	0.0	0.0	0.0	0.0	1.0	0.0	0.0	0.0	0.0	0.0	0.0	0.0
POLR3GL	84265	symbol	H. sapiens	84265	H. sapiens	0.0	1.0	0.0	0.0	0.0	0.0	0.0	0.0	0.0	0.0	0.0	0.0	1.0	0.0	0.0	0.0	0.0	0.0	0.0	0.0
POLR3H	171568	symbol	H. sapiens	171568	H. sapiens	0.0	1.0	0.0	0.0	0.0	0.0	0.0	0.0	0.0	0.0	0.0	0.0	1.0	0.0	0.0	0.0	0.0	0.0	0.0	0.0
POMT1	10585	symbol	H. sapiens	10585	H. sapiens	0.0	0.0	0.0	0.0	0.0	0.0	0.0	0.0	0.0	0.0	0.0	0.0	0.0	0.0	0.0	0.0	0.0	0.0	0.0	0.0
POPDC2	64091	symbol	H. sapiens	64091	H. sapiens	0.0	0.0	0.0	0.0	0.0	0.0	0.0	0.0	0.0	0.0	0.0	0.0	0.0	0.0	0.0	0.0	0.0	0.0	0.0	0.0
PPARGC1A	10891	symbol	H. sapiens	10891	H. sapiens	1.0	1.0	1.0	0.0	0.0	0.0	0.0	0.0	0.0	0.0	1.0	0.0	0.0	0.0	0.0	1.0	0.0	0.0	0.0	1.0
PPP1CB	5500	symbol	H. sapiens	5500	H. sapiens	0.0	0.0	0.0	0.0	0.0	0.0	0.0	0.0	0.0	0.0	0.0	0.0	0.0	0.0	0.0	0.0	1.0	0.0	0.0	0.0
PPP1R15A	23645	symbol	H. sapiens	23645	H. sapiens	0.0	0.0	0.0	0.0	0.0	0.0	0.0	1.0	1.0	0.0	0.0	1.0	0.0	0.0	1.0	1.0	0.0	0.0	0.0	0.0
PPP1R15B	84919	symbol	H. sapiens	84919	H. sapiens	0.0	0.0	0.0	0.0	0.0	0.0	0.0	0.0	1.0	0.0	0.0	0.0	0.0	0.0	1.0	1.0	0.0	0.0	0.0	0.0
PPP2CB	5516	symbol	H. sapiens	5516	H. sapiens	0.0	0.0	0.0	0.0	0.0	0.0	0.0	0.0	1.0	0.0	0.0	0.0	1.0	1.0	0.0	0.0	0.0	0.0	0.0	0.0
PPP3CB	5532	symbol	H. sapiens	5532	H. sapiens	0.0	0.0	0.0	0.0	0.0	0.0	0.0	0.0	0.0	0.0	0.0	0.0	1.0	0.0	0.0	0.0	0.0	0.0	0.0	0.0
PPP4C	5531	symbol	H. sapiens	5531	H. sapiens	0.0	0.0	0.0	0.0	0.0	0.0	1.0	0.0	1.0	0.0	0.0	0.0	1.0	0.0	0.0	1.0	0.0	0.0	0.0	1.0
PPP4R2	151987	symbol	H. sapiens	151987	H. sapiens	1.0	0.0	0.0	0.0	0.0	0.0	1.0	0.0	1.0	0.0	0.0	0.0	1.0	0.0	0.0	1.0	0.0	0.0	0.0	1.0
PPP6R2	9701	symbol	H. sapiens	9701	H. sapiens	0.0	0.0	0.0	0.0	0.0	0.0	0.0	0.0	0.0	0.0	0.0	0.0	0.0	0.0	0.0	0.0	0.0	0.0	0.0	0.0
PRDX5	25824	symbol	H. sapiens	25824	H. sapiens	0.0	0.0	0.0	0.0	0.0	0.0	0.0	1.0	1.0	1.0	0.0	0.0	0.0	0.0	0.0	0.0	0.0	0.0	0.0	0.0
PRKACA	5566	symbol	H. sapiens	5566	H. sapiens	1.0	0.0	0.0	0.0	0.0	1.0	0.0	0.0	0.0	1.0	0.0	0.0	1.0	0.0	0.0	0.0	0.0	0.0	0.0	0.0
PRKAR1A	5573	symbol	H. sapiens	5573	H. sapiens	0.0	0.0	0.0	0.0	0.0	0.0	0.0	0.0	1.0	0.0	0.0	0.0	1.0	0.0	0.0	0.0	0.0	1.0	0.0	0.0
PRKAR2A	5576	symbol	H. sapiens	5576	H. sapiens	0.0	0.0	0.0	0.0	0.0	0.0	0.0	0.0	1.0	0.0	0.0	0.0	1.0	0.0	0.0	0.0	0.0	1.0	0.0	0.0
PRLR	5618	symbol	H. sapiens	5618	H. sapiens	0.0	0.0	0.0	0.0	0.0	0.0	0.0	0.0	0.0	0.0	0.0	0.0	0.0	0.0	0.0	0.0	0.0	1.0	0.0	0.0
PRMT1	3276	symbol	H. sapiens	3276	H. sapiens	1.0	0.0	0.0	0.0	0.0	0.0	1.0	0.0	0.0	0.0	0.0	0.0	1.0	0.0	0.0	1.0	0.0	0.0	0.0	0.0
PRMT5	10419	symbol	H. sapiens	10419	H. sapiens	1.0	1.0	0.0	1.0	1.0	0.0	1.0	0.0	0.0	0.0	1.0	0.0	1.0	0.0	0.0	1.0	0.0	0.0	0.0	0.0
PRNP	5621	symbol	H. sapiens	5621	H. sapiens	0.0	0.0	0.0	0.0	0.0	0.0	0.0	0.0	1.0	1.0	0.0	0.0	0.0	0.0	1.0	0.0	0.0	1.0	0.0	0.0
PROC	5624	symbol	H. sapiens	5624	H. sapiens	0.0	0.0	0.0	0.0	0.0	0.0	0.0	0.0	0.0	0.0	0.0	0.0	0.0	0.0	0.0	0.0	0.0	0.0	0.0	0.0
PRORSD1P	344405	symbol	H. sapiens	344405	H. sapiens	0.0	0.0	0.0	0.0	1.0	0.0	0.0	0.0	0.0	0.0	0.0	0.0	0.0	0.0	0.0	0.0	0.0	0.0	0.0	0.0
PROS1	5627	symbol	H. sapiens	5627	H. sapiens	0.0	0.0	0.0	0.0	0.0	0.0	0.0	0.0	1.0	1.0	0.0	0.0	0.0	0.0	0.0	0.0	0.0	0.0	0.0	0.0
PRPF19	27339	symbol	H. sapiens	27339	H. sapiens	1.0	0.0	0.0	0.0	1.0	1.0	0.0	0.0	0.0	0.0	0.0	1.0	0.0	1.0	1.0	0.0	0.0	0.0	0.0	0.0
PRPF31	26121	symbol	H. sapiens	26121	H. sapiens	1.0	0.0	0.0	0.0	1.0	1.0	0.0	0.0	0.0	0.0	0.0	0.0	1.0	0.0	0.0	0.0	0.0	0.0	0.0	0.0
PRPF6	24148	symbol	H. sapiens	24148	H. sapiens	1.0	0.0	1.0	0.0	1.0	1.0	0.0	0.0	0.0	0.0	1.0	0.0	0.0	0.0	0.0	0.0	0.0	0.0	0.0	0.0
PRR11	55771	symbol	H. sapiens	55771	H. sapiens	0.0	0.0	0.0	0.0	0.0	0.0	0.0	0.0	0.0	0.0	0.0	0.0	0.0	0.0	0.0	0.0	0.0	0.0	0.0	0.0
PRR12	57479	symbol	H. sapiens	57479	H. sapiens	0.0	0.0	0.0	0.0	0.0	0.0	0.0	0.0	0.0	0.0	0.0	0.0	0.0	0.0	0.0	0.0	0.0	0.0	0.0	0.0
PRR13	54458	symbol	H. sapiens	54458	H. sapiens	0.0	0.0	0.0	0.0	0.0	0.0	0.0	0.0	0.0	0.0	0.0	0.0	0.0	0.0	0.0	0.0	0.0	0.0	0.0	0.0
PRR26	414235	gene_synonym	H. sapiens	414235	H. sapiens	0.0	0.0	0.0	0.0	0.0	0.0	0.0	0.0	0.0	0.0	0.0	0.0	0.0	0.0	0.0	0.0	0.0	0.0	0.0	0.0
PRRC2C	23215	symbol	H. sapiens	23215	H. sapiens	0.0	0.0	0.0	0.0	0.0	0.0	0.0	0.0	0.0	0.0	0.0	0.0	0.0	0.0	1.0	0.0	0.0	0.0	0.0	0.0
PSMB5	5693	symbol	H. sapiens	5693	H. sapiens	0.0	0.0	0.0	0.0	0.0	0.0	0.0	0.0	0.0	0.0	0.0	0.0	1.0	1.0	0.0	0.0	0.0	0.0	0.0	0.0
PSMC3	5702	symbol	H. sapiens	5702	H. sapiens	0.0	0.0	0.0	0.0	0.0	0.0	0.0	0.0	0.0	1.0	0.0	0.0	1.0	1.0	1.0	0.0	0.0	0.0	0.0	0.0
PSPC1	55269	symbol	H. sapiens	55269	H. sapiens	0.0	0.0	0.0	0.0	0.0	1.0	0.0	0.0	0.0	0.0	0.0	0.0	0.0	0.0	0.0	0.0	0.0	0.0	0.0	0.0
PTBP2	58155	symbol	H. sapiens	58155	H. sapiens	1.0	0.0	0.0	0.0	1.0	0.0	0.0	0.0	0.0	0.0	0.0	0.0	0.0	0.0	0.0	0.0	0.0	0.0	0.0	0.0
PTP4A2	8073	symbol	H. sapiens	8073	H. sapiens	0.0	0.0	0.0	0.0	0.0	0.0	0.0	0.0	0.0	0.0	0.0	0.0	0.0	0.0	0.0	0.0	0.0	0.0	0.0	0.0
PTPN3	5774	symbol	H. sapiens	5774	H. sapiens	0.0	0.0	0.0	0.0	0.0	0.0	0.0	0.0	0.0	1.0	0.0	0.0	0.0	0.0	0.0	0.0	0.0	0.0	0.0	0.0
PTPN6	5777	symbol	H. sapiens	5777	H. sapiens	0.0	0.0	0.0	0.0	0.0	0.0	0.0	0.0	1.0	0.0	0.0	0.0	0.0	0.0	0.0	0.0	1.0	1.0	0.0	0.0
PURB	5814	symbol	H. sapiens	5814	H. sapiens	0.0	0.0	1.0	0.0	0.0	0.0	0.0	0.0	0.0	0.0	0.0	0.0	0.0	0.0	0.0	0.0	0.0	0.0	0.0	0.0
PWAR6	100506965	symbol	H. sapiens	100506965	H. sapiens	0.0	0.0	0.0	0.0	0.0	0.0	0.0	0.0	0.0	0.0	0.0	0.0	0.0	0.0	0.0	0.0	0.0	0.0	0.0	0.0
PWP1	11137	symbol	H. sapiens	11137	H. sapiens	0.0	1.0	0.0	0.0	1.0	0.0	1.0	0.0	1.0	0.0	0.0	0.0	0.0	0.0	0.0	0.0	0.0	0.0	0.0	0.0
PXDC1	221749	symbol	H. sapiens	221749	H. sapiens	0.0	0.0	0.0	0.0	0.0	0.0	0.0	0.0	0.0	0.0	0.0	0.0	0.0	0.0	0.0	0.0	0.0	0.0	0.0	0.0
PYHIN1	149628	symbol	H. sapiens	149628	H. sapiens	0.0	0.0	0.0	0.0	0.0	1.0	0.0	0.0	0.0	1.0	0.0	0.0	0.0	0.0	0.0	1.0	0.0	0.0	0.0	0.0
QTRT1	81890	symbol	H. sapiens	81890	H. sapiens	0.0	0.0	0.0	0.0	1.0	0.0	0.0	1.0	0.0	0.0	0.0	0.0	1.0	0.0	0.0	0.0	0.0	0.0	1.0	0.0
QTRT2	79691	symbol	H. sapiens	79691	H. sapiens	0.0	0.0	0.0	0.0	1.0	0.0	0.0	1.0	0.0	0.0	0.0	0.0	1.0	0.0	0.0	0.0	0.0	0.0	1.0	0.0
R3HCC1L	27291	symbol	H. sapiens	27291	H. sapiens	0.0	0.0	0.0	0.0	0.0	0.0	0.0	0.0	0.0	0.0	0.0	0.0	0.0	0.0	0.0	0.0	0.0	0.0	0.0	0.0
R3HDM1	23518	symbol	H. sapiens	23518	H. sapiens	0.0	0.0	0.0	0.0	0.0	0.0	0.0	0.0	0.0	0.0	0.0	0.0	0.0	0.0	0.0	0.0	0.0	0.0	0.0	0.0
RAB17	64284	symbol	H. sapiens	64284	H. sapiens	0.0	0.0	0.0	0.0	0.0	0.0	0.0	0.0	0.0	0.0	0.0	0.0	0.0	0.0	0.0	0.0	0.0	0.0	0.0	0.0
RAB27A	5873	symbol	H. sapiens	5873	H. sapiens	0.0	0.0	0.0	0.0	0.0	0.0	0.0	0.0	0.0	0.0	0.0	0.0	0.0	0.0	0.0	0.0	0.0	0.0	0.0	0.0
RAB37	326624	symbol	H. sapiens	326624	H. sapiens	0.0	0.0	0.0	0.0	0.0	0.0	0.0	0.0	0.0	0.0	0.0	0.0	0.0	0.0	0.0	0.0	0.0	0.0	0.0	0.0
RABGAP1	23637	symbol	H. sapiens	23637	H. sapiens	0.0	0.0	0.0	0.0	0.0	0.0	0.0	0.0	0.0	0.0	0.0	0.0	0.0	0.0	0.0	0.0	0.0	0.0	0.0	0.0
RACGAP1	29127	symbol	H. sapiens	29127	H. sapiens	0.0	0.0	0.0	0.0	0.0	0.0	0.0	0.0	0.0	0.0	0.0	0.0	0.0	0.0	0.0	0.0	1.0	0.0	0.0	0.0
RALB	5899	symbol	H. sapiens	5899	H. sapiens	0.0	0.0	0.0	0.0	0.0	0.0	0.0	0.0	1.0	1.0	0.0	0.0	0.0	0.0	0.0	0.0	1.0	1.0	0.0	0.0
RALGPS1	9649	symbol	H. sapiens	9649	H. sapiens	0.0	0.0	0.0	0.0	0.0	0.0	0.0	0.0	0.0	0.0	0.0	0.0	0.0	0.0	0.0	0.0	0.0	0.0	0.0	0.0
RAMP2	10266	symbol	H. sapiens	10266	H. sapiens	0.0	0.0	0.0	0.0	0.0	0.0	0.0	0.0	0.0	0.0	0.0	0.0	0.0	0.0	0.0	0.0	0.0	0.0	0.0	0.0
RANBP1	5902	symbol	H. sapiens	5902	H. sapiens	0.0	0.0	0.0	0.0	0.0	0.0	0.0	0.0	0.0	0.0	0.0	0.0	0.0	0.0	0.0	0.0	0.0	0.0	0.0	0.0
RASA2	5922	symbol	H. sapiens	5922	H. sapiens	0.0	0.0	0.0	0.0	0.0	0.0	0.0	0.0	1.0	0.0	0.0	0.0	0.0	0.0	0.0	0.0	0.0	0.0	0.0	0.0
RASAL2	9462	symbol	H. sapiens	9462	H. sapiens	0.0	0.0	0.0	0.0	0.0	0.0	0.0	0.0	0.0	0.0	0.0	0.0	0.0	0.0	0.0	0.0	0.0	0.0	0.0	0.0
RASGEF1B	153020	symbol	H. sapiens	153020	H. sapiens	0.0	0.0	0.0	0.0	0.0	0.0	0.0	0.0	0.0	0.0	0.0	0.0	0.0	0.0	0.0	0.0	0.0	0.0	0.0	0.0
RASIP1	54922	symbol	H. sapiens	54922	H. sapiens	0.0	0.0	0.0	0.0	0.0	0.0	0.0	0.0	1.0	0.0	0.0	0.0	0.0	0.0	0.0	0.0	0.0	1.0	1.0	0.0
RB1CC1	9821	symbol	H. sapiens	9821	H. sapiens	0.0	0.0	0.0	0.0	0.0	0.0	0.0	0.0	0.0	0.0	0.0	0.0	1.0	0.0	0.0	1.0	0.0	1.0	0.0	0.0
RBM14	10432	symbol	H. sapiens	10432	H. sapiens	1.0	0.0	1.0	0.0	0.0	1.0	1.0	0.0	0.0	0.0	1.0	0.0	0.0	0.0	0.0	0.0	0.0	0.0	0.0	0.0
RBM26	64062	symbol	H. sapiens	64062	H. sapiens	1.0	0.0	0.0	0.0	0.0	0.0	0.0	0.0	0.0	0.0	0.0	0.0	0.0	0.0	0.0	0.0	0.0	0.0	0.0	0.0
RBM3	5935	symbol	H. sapiens	5935	H. sapiens	1.0	0.0	0.0	0.0	0.0	0.0	0.0	0.0	0.0	0.0	0.0	0.0	0.0	0.0	1.0	0.0	0.0	0.0	0.0	0.0
RBM33	155435	symbol	H. sapiens	155435	H. sapiens	0.0	0.0	0.0	0.0	0.0	0.0	0.0	0.0	0.0	0.0	0.0	0.0	0.0	0.0	0.0	0.0	0.0	0.0	0.0	0.0
RBM45	129831	symbol	H. sapiens	129831	H. sapiens	1.0	0.0	0.0	0.0	0.0	0.0	0.0	0.0	0.0	0.0	0.0	0.0	0.0	0.0	0.0	0.0	0.0	0.0	0.0	0.0
RBM4B	83759	symbol	H. sapiens	83759	H. sapiens	1.0	0.0	0.0	0.0	0.0	1.0	0.0	0.0	0.0	0.0	0.0	0.0	0.0	0.0	1.0	0.0	0.0	0.0	0.0	0.0
RBM8A	9939	symbol	H. sapiens	9939	H. sapiens	1.0	0.0	0.0	0.0	0.0	1.0	0.0	0.0	0.0	0.0	0.0	0.0	0.0	0.0	1.0	0.0	0.0	0.0	0.0	0.0
RBPMS	11030	symbol	H. sapiens	11030	H. sapiens	0.0	0.0	0.0	0.0	0.0	0.0	0.0	0.0	0.0	0.0	1.0	0.0	0.0	0.0	1.0	0.0	0.0	1.0	1.0	0.0
RCAN1	1827	symbol	H. sapiens	1827	H. sapiens	0.0	0.0	0.0	0.0	0.0	0.0	0.0	0.0	1.0	0.0	0.0	0.0	0.0	0.0	0.0	0.0	0.0	0.0	0.0	0.0
RCOR3	55758	symbol	H. sapiens	55758	H. sapiens	0.0	0.0	1.0	0.0	0.0	0.0	1.0	0.0	0.0	0.0	1.0	0.0	0.0	0.0	0.0	0.0	0.0	0.0	0.0	0.0
RER1	11079	symbol	H. sapiens	11079	H. sapiens	0.0	0.0	0.0	0.0	0.0	0.0	0.0	0.0	0.0	0.0	0.0	0.0	0.0	0.0	0.0	0.0	0.0	0.0	0.0	0.0
REXO2	25996	symbol	H. sapiens	25996	H. sapiens	0.0	0.0	0.0	0.0	0.0	0.0	0.0	1.0	0.0	0.0	0.0	1.0	0.0	0.0	0.0	0.0	0.0	0.0	0.0	0.0
RFC5	5985	symbol	H. sapiens	5985	H. sapiens	0.0	0.0	0.0	0.0	0.0	0.0	0.0	0.0	0.0	0.0	0.0	1.0	0.0	0.0	0.0	1.0	0.0	1.0	0.0	0.0
RFX7	64864	symbol	H. sapiens	64864	H. sapiens	0.0	0.0	0.0	0.0	0.0	0.0	0.0	0.0	0.0	0.0	0.0	0.0	0.0	0.0	0.0	0.0	0.0	0.0	0.0	0.0
RGS1	5996	symbol	H. sapiens	5996	H. sapiens	0.0	0.0	0.0	0.0	0.0	0.0	0.0	0.0	0.0	0.0	0.0	0.0	0.0	0.0	0.0	0.0	0.0	0.0	0.0	0.0
RHOB	388	symbol	H. sapiens	388	H. sapiens	0.0	0.0	0.0	0.0	0.0	0.0	0.0	0.0	0.0	0.0	0.0	0.0	0.0	0.0	0.0	0.0	1.0	0.0	0.0	0.0
RHOBTB1	9886	symbol	H. sapiens	9886	H. sapiens	0.0	0.0	0.0	0.0	0.0	0.0	0.0	0.0	0.0	0.0	0.0	0.0	0.0	0.0	0.0	0.0	0.0	0.0	0.0	0.0
RHOU	58480	symbol	H. sapiens	58480	H. sapiens	0.0	0.0	0.0	0.0	0.0	0.0	0.0	0.0	0.0	0.0	0.0	0.0	0.0	0.0	0.0	0.0	1.0	0.0	0.0	0.0
RHPN2	85415	symbol	H. sapiens	85415	H. sapiens	0.0	0.0	0.0	0.0	0.0	0.0	0.0	0.0	0.0	0.0	0.0	0.0	0.0	0.0	0.0	0.0	0.0	0.0	0.0	0.0
RILP	83547	symbol	H. sapiens	83547	H. sapiens	0.0	0.0	0.0	0.0	0.0	0.0	0.0	0.0	0.0	1.0	0.0	0.0	0.0	0.0	0.0	0.0	0.0	0.0	0.0	0.0
RILPL2	196383	symbol	H. sapiens	196383	H. sapiens	0.0	0.0	0.0	0.0	0.0	0.0	0.0	0.0	0.0	0.0	0.0	0.0	0.0	0.0	0.0	0.0	0.0	0.0	0.0	0.0
RIPK4	54101	symbol	H. sapiens	54101	H. sapiens	0.0	0.0	0.0	0.0	0.0	0.0	0.0	0.0	0.0	0.0	0.0	0.0	0.0	0.0	0.0	0.0	0.0	0.0	0.0	0.0
RLIM	51132	symbol	H. sapiens	51132	H. sapiens	0.0	0.0	1.0	1.0	0.0	0.0	0.0	0.0	0.0	0.0	1.0	0.0	0.0	1.0	0.0	0.0	0.0	0.0	0.0	0.0
RND3	390	symbol	H. sapiens	390	H. sapiens	0.0	0.0	0.0	0.0	0.0	0.0	0.0	0.0	0.0	0.0	0.0	0.0	0.0	0.0	0.0	0.0	0.0	0.0	0.0	0.0
RNF114	55905	symbol	H. sapiens	55905	H. sapiens	0.0	0.0	0.0	0.0	0.0	0.0	0.0	0.0	0.0	0.0	0.0	0.0	0.0	1.0	0.0	0.0	0.0	0.0	0.0	0.0
RNF126	55658	symbol	H. sapiens	55658	H. sapiens	0.0	0.0	0.0	0.0	0.0	0.0	0.0	0.0	0.0	0.0	0.0	0.0	0.0	1.0	0.0	0.0	0.0	0.0	0.0	0.0
RNF128	79589	symbol	H. sapiens	79589	H. sapiens	0.0	0.0	0.0	0.0	0.0	0.0	0.0	0.0	0.0	1.0	0.0	0.0	0.0	1.0	0.0	0.0	0.0	0.0	0.0	0.0
RNF141	50862	symbol	H. sapiens	50862	H. sapiens	0.0	0.0	0.0	0.0	0.0	0.0	0.0	0.0	0.0	0.0	0.0	0.0	0.0	1.0	0.0	0.0	0.0	0.0	0.0	0.0
RNF148	378925	symbol	H. sapiens	378925	H. sapiens	0.0	0.0	0.0	0.0	0.0	0.0	0.0	0.0	0.0	0.0	0.0	0.0	0.0	1.0	0.0	0.0	0.0	0.0	0.0	0.0
RNF152	220441	symbol	H. sapiens	220441	H. sapiens	0.0	0.0	0.0	0.0	0.0	0.0	0.0	0.0	1.0	1.0	0.0	0.0	0.0	1.0	0.0	0.0	0.0	0.0	0.0	0.0
RNF168	165918	symbol	H. sapiens	165918	H. sapiens	0.0	0.0	0.0	1.0	0.0	0.0	1.0	0.0	0.0	0.0	0.0	1.0	1.0	1.0	0.0	1.0	0.0	0.0	0.0	0.0
RNF185-AS1	100852405	symbol	H. sapiens	100852405	H. sapiens	0.0	0.0	0.0	0.0	0.0	0.0	0.0	0.0	0.0	0.0	0.0	0.0	0.0	0.0	0.0	0.0	0.0	0.0	0.0	0.0
RNF213	57674	symbol	H. sapiens	57674	H. sapiens	0.0	0.0	0.0	0.0	0.0	0.0	0.0	0.0	0.0	0.0	0.0	0.0	0.0	1.0	0.0	0.0	0.0	0.0	0.0	0.0
RNF38	152006	symbol	H. sapiens	152006	H. sapiens	0.0	0.0	0.0	0.0	0.0	0.0	0.0	0.0	0.0	0.0	0.0	0.0	0.0	1.0	0.0	0.0	0.0	0.0	0.0	0.0
RNF40	9810	symbol	H. sapiens	9810	H. sapiens	0.0	0.0	0.0	1.0	0.0	0.0	1.0	0.0	0.0	1.0	0.0	0.0	1.0	1.0	1.0	0.0	0.0	0.0	1.0	1.0
RNF43	54894	symbol	H. sapiens	54894	H. sapiens	0.0	0.0	0.0	0.0	0.0	0.0	0.0	0.0	0.0	0.0	0.0	0.0	0.0	1.0	0.0	0.0	0.0	0.0	0.0	0.0
RNF44	22838	symbol	H. sapiens	22838	H. sapiens	0.0	0.0	0.0	0.0	0.0	0.0	0.0	0.0	0.0	0.0	0.0	0.0	0.0	0.0	0.0	0.0	0.0	0.0	0.0	0.0
RNU105B	26767	symbol	H. sapiens	26767	H. sapiens	0.0	0.0	0.0	0.0	0.0	0.0	0.0	0.0	0.0	0.0	0.0	0.0	0.0	0.0	0.0	0.0	0.0	0.0	0.0	0.0
RNU6ATAC	100151684	symbol	H. sapiens	100151684	H. sapiens	1.0	0.0	0.0	0.0	1.0	0.0	0.0	0.0	0.0	0.0	0.0	0.0	0.0	0.0	0.0	0.0	0.0	0.0	0.0	0.0
RPAP2	79871	symbol	H. sapiens	79871	H. sapiens	0.0	1.0	0.0	0.0	0.0	0.0	0.0	0.0	0.0	0.0	0.0	0.0	1.0	0.0	0.0	0.0	0.0	0.0	0.0	0.0
RPL15	6138	symbol	H. sapiens	6138	H. sapiens	1.0	0.0	0.0	0.0	0.0	0.0	0.0	0.0	0.0	0.0	0.0	0.0	0.0	0.0	0.0	0.0	0.0	0.0	0.0	0.0
RPL23AP32	56969	symbol	H. sapiens	56969	H. sapiens	0.0	0.0	0.0	0.0	0.0	0.0	0.0	0.0	0.0	0.0	0.0	0.0	0.0	0.0	0.0	0.0	0.0	0.0	0.0	0.0
RPL3	6122	symbol	H. sapiens	6122	H. sapiens	1.0	0.0	0.0	0.0	1.0	0.0	0.0	0.0	0.0	0.0	0.0	0.0	0.0	0.0	0.0	0.0	0.0	0.0	0.0	0.0
RPLP0	6175	symbol	H. sapiens	6175	H. sapiens	1.0	0.0	0.0	0.0	1.0	0.0	0.0	0.0	0.0	0.0	0.0	0.0	0.0	0.0	1.0	0.0	0.0	0.0	0.0	0.0
RPS2	6187	symbol	H. sapiens	6187	H. sapiens	1.0	0.0	0.0	0.0	0.0	0.0	0.0	0.0	0.0	0.0	0.0	0.0	0.0	0.0	0.0	0.0	0.0	1.0	0.0	0.0
RPS20P27	729927	symbol	H. sapiens	729927	H. sapiens	0.0	0.0	0.0	0.0	0.0	0.0	0.0	0.0	0.0	0.0	0.0	0.0	0.0	0.0	0.0	0.0	0.0	0.0	0.0	0.0
RRAGD	58528	symbol	H. sapiens	58528	H. sapiens	0.0	0.0	0.0	0.0	0.0	0.0	0.0	0.0	0.0	0.0	0.0	0.0	0.0	0.0	0.0	0.0	0.0	0.0	0.0	0.0
RRBP1	6238	symbol	H. sapiens	6238	H. sapiens	0.0	0.0	0.0	0.0	0.0	0.0	0.0	0.0	0.0	0.0	0.0	0.0	0.0	0.0	0.0	0.0	0.0	0.0	0.0	0.0
RRP1	8568	symbol	H. sapiens	8568	H. sapiens	1.0	0.0	0.0	0.0	1.0	0.0	0.0	0.0	0.0	0.0	0.0	0.0	0.0	0.0	0.0	0.0	0.0	0.0	0.0	0.0
RSL1D1	26156	symbol	H. sapiens	26156	H. sapiens	1.0	0.0	0.0	0.0	1.0	0.0	0.0	0.0	0.0	0.0	0.0	0.0	0.0	0.0	0.0	1.0	0.0	0.0	0.0	0.0
RSRC1	51319	symbol	H. sapiens	51319	H. sapiens	1.0	0.0	0.0	0.0	0.0	1.0	0.0	0.0	0.0	0.0	0.0	0.0	0.0	0.0	0.0	0.0	0.0	0.0	0.0	0.0
RSRP1	57035	symbol	H. sapiens	57035	H. sapiens	0.0	0.0	0.0	0.0	0.0	0.0	0.0	0.0	0.0	0.0	0.0	0.0	0.0	0.0	0.0	0.0	0.0	0.0	0.0	0.0
RTCB	51493	symbol	H. sapiens	51493	H. sapiens	1.0	0.0	0.0	0.0	1.0	0.0	0.0	0.0	0.0	0.0	0.0	0.0	1.0	0.0	0.0	0.0	0.0	0.0	0.0	0.0
RTN3	10313	symbol	H. sapiens	10313	H. sapiens	0.0	0.0	0.0	0.0	0.0	0.0	0.0	0.0	0.0	0.0	0.0	0.0	0.0	0.0	1.0	0.0	0.0	0.0	0.0	0.0
RUFY2	55680	symbol	H. sapiens	55680	H. sapiens	0.0	0.0	0.0	0.0	0.0	0.0	0.0	0.0	0.0	0.0	0.0	0.0	0.0	0.0	0.0	0.0	0.0	0.0	0.0	0.0
RUNDC3A	10900	symbol	H. sapiens	10900	H. sapiens	0.0	0.0	0.0	0.0	0.0	0.0	0.0	0.0	0.0	0.0	0.0	0.0	0.0	0.0	0.0	0.0	0.0	0.0	0.0	0.0
RUNDC3B	154661	symbol	H. sapiens	154661	H. sapiens	0.0	0.0	0.0	0.0	0.0	0.0	0.0	0.0	0.0	0.0	0.0	0.0	0.0	0.0	0.0	0.0	0.0	0.0	0.0	0.0
RUSC1-AS1	284618	symbol	H. sapiens	284618	H. sapiens	0.0	0.0	0.0	0.0	0.0	0.0	0.0	0.0	0.0	0.0	0.0	0.0	0.0	0.0	0.0	0.0	0.0	0.0	0.0	0.0
S100A10	6281	symbol	H. sapiens	6281	H. sapiens	0.0	0.0	0.0	0.0	0.0	0.0	0.0	0.0	0.0	1.0	0.0	0.0	0.0	0.0	0.0	0.0	0.0	0.0	1.0	0.0
S100PBP	64766	symbol	H. sapiens	64766	H. sapiens	0.0	0.0	0.0	0.0	0.0	1.0	0.0	0.0	0.0	0.0	0.0	0.0	0.0	0.0	0.0	0.0	0.0	0.0	0.0	0.0
SAMD12	401474	symbol	H. sapiens	401474	H. sapiens	0.0	0.0	0.0	0.0	0.0	0.0	0.0	0.0	0.0	0.0	0.0	0.0	0.0	0.0	0.0	0.0	0.0	0.0	0.0	0.0
SAMD5	389432	symbol	H. sapiens	389432	H. sapiens	0.0	0.0	0.0	0.0	0.0	0.0	0.0	0.0	0.0	0.0	0.0	0.0	0.0	0.0	0.0	0.0	0.0	0.0	0.0	0.0
SAP130	79595	symbol	H. sapiens	79595	H. sapiens	0.0	0.0	0.0	0.0	0.0	1.0	0.0	0.0	0.0	0.0	0.0	0.0	0.0	0.0	0.0	0.0	0.0	0.0	0.0	0.0
SARS	6301	gene_synonym	H. sapiens	6301	H. sapiens	0.0	1.0	0.0	0.0	1.0	0.0	0.0	0.0	0.0	0.0	0.0	0.0	0.0	0.0	0.0	0.0	0.0	0.0	1.0	0.0
SART1	9092	symbol	H. sapiens	9092	H. sapiens	1.0	0.0	0.0	0.0	1.0	1.0	0.0	0.0	0.0	0.0	0.0	0.0	0.0	0.0	0.0	0.0	0.0	0.0	0.0	0.0
SASS6	163786	symbol	H. sapiens	163786	H. sapiens	0.0	0.0	0.0	0.0	0.0	0.0	0.0	0.0	0.0	0.0	0.0	0.0	0.0	0.0	0.0	0.0	0.0	0.0	0.0	0.0
SAT2	112483	symbol	H. sapiens	112483	H. sapiens	0.0	0.0	0.0	0.0	0.0	0.0	0.0	0.0	0.0	0.0	0.0	0.0	0.0	0.0	0.0	0.0	0.0	0.0	0.0	0.0
SCAF8	22828	symbol	H. sapiens	22828	H. sapiens	1.0	1.0	0.0	0.0	0.0	0.0	0.0	0.0	0.0	0.0	0.0	0.0	0.0	0.0	0.0	0.0	0.0	0.0	0.0	0.0
SCARF1	8578	symbol	H. sapiens	8578	H. sapiens	0.0	0.0	0.0	0.0	0.0	0.0	0.0	0.0	0.0	0.0	0.0	0.0	0.0	0.0	0.0	1.0	0.0	0.0	0.0	0.0
SCGB2B2	284402	symbol	H. sapiens	284402	H. sapiens	0.0	0.0	0.0	0.0	0.0	0.0	0.0	0.0	0.0	0.0	0.0	0.0	0.0	0.0	0.0	0.0	0.0	0.0	0.0	0.0
SCMH1	22955	symbol	H. sapiens	22955	H. sapiens	0.0	0.0	0.0	1.0	0.0	0.0	0.0	0.0	0.0	0.0	0.0	0.0	0.0	0.0	0.0	0.0	0.0	0.0	0.0	0.0
SCN8A	6334	symbol	H. sapiens	6334	H. sapiens	0.0	0.0	0.0	0.0	0.0	0.0	0.0	0.0	0.0	0.0	0.0	0.0	0.0	0.0	0.0	0.0	0.0	0.0	0.0	0.0
SCYL1	57410	symbol	H. sapiens	57410	H. sapiens	0.0	0.0	0.0	0.0	0.0	0.0	0.0	0.0	0.0	0.0	0.0	0.0	0.0	0.0	0.0	0.0	0.0	0.0	0.0	0.0
SDCCAG3	10807	gene_synonym	H. sapiens	10807	H. sapiens	0.0	0.0	0.0	0.0	0.0	0.0	0.0	0.0	0.0	0.0	0.0	0.0	0.0	0.0	0.0	0.0	1.0	0.0	0.0	0.0
SDCCAG8	10806	symbol	H. sapiens	10806	H. sapiens	0.0	0.0	0.0	0.0	0.0	0.0	0.0	0.0	0.0	0.0	0.0	0.0	0.0	0.0	0.0	0.0	0.0	0.0	0.0	0.0
SDE2	163859	symbol	H. sapiens	163859	H. sapiens	0.0	0.0	0.0	0.0	0.0	1.0	0.0	0.0	0.0	0.0	0.0	1.0	0.0	1.0	0.0	0.0	1.0	0.0	0.0	0.0
SDF2	6388	symbol	H. sapiens	6388	H. sapiens	0.0	0.0	0.0	0.0	0.0	0.0	0.0	0.0	0.0	0.0	0.0	0.0	0.0	0.0	0.0	0.0	0.0	0.0	0.0	0.0
SDR42E1	93517	symbol	H. sapiens	93517	H. sapiens	0.0	0.0	0.0	0.0	0.0	0.0	0.0	0.0	0.0	0.0	0.0	0.0	0.0	0.0	0.0	0.0	0.0	0.0	0.0	0.0
SEH1L	81929	symbol	H. sapiens	81929	H. sapiens	0.0	0.0	0.0	0.0	0.0	0.0	0.0	0.0	0.0	0.0	0.0	0.0	0.0	0.0	0.0	0.0	1.0	0.0	0.0	0.0
SELE	6401	symbol	H. sapiens	6401	H. sapiens	0.0	0.0	0.0	0.0	0.0	0.0	0.0	0.0	0.0	0.0	0.0	0.0	0.0	0.0	0.0	0.0	0.0	0.0	0.0	0.0
SEMA6D	80031	symbol	H. sapiens	80031	H. sapiens	0.0	0.0	0.0	0.0	0.0	0.0	0.0	0.0	0.0	0.0	0.0	0.0	0.0	0.0	0.0	0.0	0.0	0.0	0.0	0.0
SENP2	59343	symbol	H. sapiens	59343	H. sapiens	0.0	0.0	0.0	0.0	0.0	0.0	1.0	0.0	1.0	0.0	0.0	0.0	0.0	0.0	0.0	0.0	0.0	0.0	0.0	0.0
SEPHS2	22928	symbol	H. sapiens	22928	H. sapiens	0.0	0.0	0.0	0.0	0.0	0.0	0.0	0.0	0.0	0.0	0.0	0.0	0.0	0.0	0.0	0.0	0.0	0.0	0.0	0.0
SERINC1	57515	symbol	H. sapiens	57515	H. sapiens	0.0	0.0	0.0	0.0	0.0	0.0	0.0	0.0	0.0	0.0	0.0	0.0	0.0	0.0	0.0	0.0	0.0	1.0	0.0	0.0
SERPINB8	5271	symbol	H. sapiens	5271	H. sapiens	0.0	0.0	0.0	0.0	0.0	0.0	0.0	0.0	1.0	1.0	0.0	0.0	0.0	0.0	0.0	0.0	0.0	0.0	0.0	0.0
SERPINE1	5054	symbol	H. sapiens	5054	H. sapiens	0.0	0.0	0.0	0.0	0.0	0.0	0.0	0.0	1.0	1.0	0.0	0.0	0.0	0.0	0.0	0.0	0.0	0.0	0.0	0.0
SERTAD1	29950	symbol	H. sapiens	29950	H. sapiens	0.0	0.0	0.0	0.0	0.0	0.0	0.0	0.0	1.0	0.0	0.0	0.0	0.0	0.0	0.0	0.0	0.0	1.0	0.0	0.0
SET	6418	symbol	H. sapiens	6418	H. sapiens	0.0	0.0	0.0	1.0	0.0	0.0	0.0	0.0	1.0	0.0	0.0	0.0	0.0	0.0	0.0	0.0	0.0	0.0	0.0	1.0
SETD4	54093	symbol	H. sapiens	54093	H. sapiens	0.0	0.0	0.0	0.0	0.0	0.0	1.0	0.0	0.0	0.0	0.0	0.0	0.0	0.0	0.0	0.0	0.0	0.0	0.0	0.0
SETD5	55209	symbol	H. sapiens	55209	H. sapiens	0.0	0.0	0.0	1.0	0.0	0.0	1.0	0.0	0.0	0.0	0.0	0.0	0.0	0.0	0.0	0.0	0.0	0.0	0.0	1.0
SETD7	80854	symbol	H. sapiens	80854	H. sapiens	0.0	0.0	0.0	1.0	0.0	0.0	1.0	0.0	0.0	0.0	0.0	1.0	0.0	0.0	0.0	0.0	0.0	0.0	0.0	1.0
SETDB1	9869	symbol	H. sapiens	9869	H. sapiens	0.0	0.0	0.0	1.0	0.0	0.0	1.0	0.0	0.0	0.0	0.0	0.0	0.0	0.0	0.0	0.0	0.0	0.0	0.0	0.0
SETMAR	6419	symbol	H. sapiens	6419	H. sapiens	0.0	0.0	0.0	1.0	0.0	0.0	1.0	0.0	0.0	0.0	0.0	1.0	0.0	0.0	0.0	1.0	1.0	0.0	1.0	0.0
SFMBT1	51460	symbol	H. sapiens	51460	H. sapiens	0.0	0.0	0.0	1.0	0.0	0.0	0.0	0.0	0.0	0.0	1.0	0.0	0.0	0.0	0.0	0.0	0.0	0.0	0.0	0.0
SFSWAP	6433	symbol	H. sapiens	6433	H. sapiens	1.0	0.0	0.0	0.0	1.0	0.0	0.0	0.0	0.0	0.0	0.0	0.0	0.0	0.0	1.0	0.0	0.0	0.0	0.0	0.0
SGMS2	166929	symbol	H. sapiens	166929	H. sapiens	0.0	0.0	0.0	0.0	0.0	0.0	0.0	0.0	0.0	0.0	0.0	0.0	0.0	0.0	0.0	0.0	0.0	0.0	0.0	0.0
SGSM3	27352	symbol	H. sapiens	27352	H. sapiens	0.0	0.0	0.0	0.0	0.0	0.0	0.0	0.0	0.0	1.0	0.0	0.0	0.0	0.0	0.0	0.0	0.0	0.0	0.0	0.0
SH3BP5	9467	symbol	H. sapiens	9467	H. sapiens	0.0	0.0	0.0	0.0	0.0	0.0	0.0	0.0	1.0	0.0	0.0	0.0	0.0	0.0	0.0	0.0	0.0	1.0	0.0	0.0
SHB	6461	symbol	H. sapiens	6461	H. sapiens	0.0	0.0	0.0	0.0	0.0	0.0	0.0	0.0	0.0	0.0	0.0	0.0	0.0	0.0	1.0	0.0	0.0	0.0	0.0	0.0
SHH	6469	symbol	H. sapiens	6469	H. sapiens	0.0	0.0	0.0	0.0	0.0	0.0	0.0	0.0	0.0	1.0	0.0	0.0	0.0	0.0	0.0	0.0	0.0	0.0	0.0	0.0
SHPRH	257218	symbol	H. sapiens	257218	H. sapiens	0.0	0.0	0.0	1.0	0.0	0.0	0.0	0.0	0.0	0.0	0.0	1.0	0.0	1.0	0.0	0.0	0.0	0.0	0.0	0.0
SIPA1L3	23094	symbol	H. sapiens	23094	H. sapiens	0.0	0.0	0.0	0.0	0.0	0.0	0.0	0.0	0.0	0.0	0.0	0.0	0.0	0.0	0.0	0.0	0.0	0.0	0.0	0.0
SIRT3	23410	symbol	H. sapiens	23410	H. sapiens	0.0	0.0	0.0	0.0	0.0	0.0	1.0	1.0	0.0	0.0	0.0	0.0	0.0	0.0	1.0	0.0	0.0	0.0	0.0	0.0
SIRT6	51548	symbol	H. sapiens	51548	H. sapiens	0.0	0.0	0.0	1.0	0.0	0.0	1.0	0.0	1.0	1.0	1.0	1.0	0.0	0.0	0.0	1.0	0.0	0.0	0.0	0.0
SIVA1	10572	symbol	H. sapiens	10572	H. sapiens	0.0	0.0	0.0	0.0	0.0	0.0	0.0	0.0	0.0	0.0	0.0	0.0	0.0	0.0	0.0	0.0	0.0	0.0	0.0	0.0
SLBP	7884	symbol	H. sapiens	7884	H. sapiens	1.0	0.0	0.0	0.0	0.0	0.0	0.0	0.0	0.0	0.0	0.0	0.0	0.0	0.0	0.0	0.0	0.0	0.0	0.0	0.0
SLC19A2	10560	symbol	H. sapiens	10560	H. sapiens	0.0	0.0	0.0	0.0	0.0	0.0	0.0	0.0	0.0	0.0	0.0	0.0	0.0	0.0	0.0	0.0	0.0	0.0	0.0	0.0
SLC1A1	6505	symbol	H. sapiens	6505	H. sapiens	0.0	0.0	0.0	0.0	0.0	0.0	0.0	0.0	0.0	1.0	0.0	0.0	0.0	0.0	0.0	0.0	0.0	1.0	0.0	0.0
SLC22A10	387775	symbol	H. sapiens	387775	H. sapiens	0.0	0.0	0.0	0.0	0.0	0.0	0.0	0.0	0.0	0.0	0.0	0.0	0.0	0.0	0.0	0.0	0.0	0.0	0.0	0.0
SLC22A5	6584	symbol	H. sapiens	6584	H. sapiens	0.0	0.0	0.0	0.0	0.0	0.0	0.0	0.0	0.0	0.0	0.0	0.0	0.0	0.0	0.0	0.0	0.0	0.0	0.0	0.0
SLC25A25	114789	symbol	H. sapiens	114789	H. sapiens	0.0	0.0	0.0	0.0	0.0	0.0	0.0	1.0	0.0	0.0	0.0	0.0	0.0	0.0	0.0	0.0	0.0	0.0	0.0	0.0
SLC25A32	81034	symbol	H. sapiens	81034	H. sapiens	0.0	0.0	0.0	0.0	0.0	0.0	0.0	1.0	0.0	0.0	0.0	0.0	0.0	0.0	0.0	0.0	0.0	0.0	0.0	0.0
SLC25A4	291	symbol	H. sapiens	291	H. sapiens	0.0	0.0	0.0	0.0	0.0	0.0	0.0	1.0	0.0	1.0	0.0	0.0	0.0	0.0	0.0	0.0	0.0	0.0	0.0	0.0
SLC27A4	10999	symbol	H. sapiens	10999	H. sapiens	0.0	0.0	0.0	0.0	0.0	0.0	0.0	0.0	1.0	0.0	0.0	0.0	0.0	0.0	0.0	0.0	0.0	0.0	0.0	0.0
SLC30A1	7779	symbol	H. sapiens	7779	H. sapiens	0.0	0.0	0.0	0.0	0.0	0.0	0.0	0.0	0.0	0.0	0.0	0.0	0.0	0.0	0.0	0.0	0.0	0.0	0.0	0.0
SLC35B2	347734	symbol	H. sapiens	347734	H. sapiens	0.0	1.0	0.0	0.0	0.0	0.0	0.0	0.0	0.0	0.0	0.0	0.0	0.0	0.0	0.0	0.0	0.0	0.0	0.0	0.0
SLC37A4	2542	symbol	H. sapiens	2542	H. sapiens	0.0	0.0	0.0	0.0	0.0	0.0	0.0	0.0	0.0	0.0	0.0	0.0	0.0	0.0	0.0	0.0	0.0	0.0	0.0	0.0
SLC38A2	54407	symbol	H. sapiens	54407	H. sapiens	0.0	0.0	0.0	0.0	0.0	0.0	0.0	0.0	0.0	0.0	0.0	0.0	0.0	0.0	0.0	1.0	0.0	0.0	0.0	0.0
SLC39A1	27173	symbol	H. sapiens	27173	H. sapiens	0.0	0.0	0.0	0.0	0.0	0.0	0.0	0.0	0.0	0.0	0.0	0.0	0.0	0.0	0.0	0.0	0.0	0.0	0.0	0.0
SLC39A8	64116	symbol	H. sapiens	64116	H. sapiens	0.0	1.0	0.0	0.0	0.0	0.0	0.0	0.0	0.0	0.0	0.0	0.0	0.0	0.0	0.0	0.0	0.0	0.0	0.0	0.0
SLC3A2	6520	symbol	H. sapiens	6520	H. sapiens	0.0	0.0	0.0	0.0	0.0	0.0	0.0	0.0	0.0	0.0	0.0	0.0	0.0	0.0	0.0	0.0	0.0	0.0	0.0	0.0
SLC9A3R2	9351	symbol	H. sapiens	9351	H. sapiens	0.0	0.0	0.0	0.0	0.0	0.0	0.0	0.0	0.0	0.0	0.0	0.0	0.0	0.0	0.0	0.0	0.0	0.0	0.0	0.0
SLC9A6	10479	symbol	H. sapiens	10479	H. sapiens	0.0	0.0	0.0	0.0	0.0	0.0	0.0	0.0	0.0	0.0	0.0	0.0	0.0	0.0	0.0	0.0	0.0	0.0	0.0	0.0
SLFN12L	100506736	symbol	H. sapiens	100506736	H. sapiens	0.0	0.0	0.0	0.0	0.0	0.0	0.0	0.0	0.0	0.0	0.0	0.0	0.0	0.0	0.0	0.0	0.0	0.0	0.0	0.0
SLU7	10569	symbol	H. sapiens	10569	H. sapiens	1.0	0.0	0.0	0.0	1.0	1.0	0.0	0.0	0.0	0.0	0.0	0.0	0.0	0.0	0.0	0.0	0.0	0.0	0.0	0.0
SLX4	84464	symbol	H. sapiens	84464	H. sapiens	0.0	0.0	0.0	0.0	0.0	0.0	0.0	0.0	0.0	0.0	0.0	1.0	0.0	0.0	0.0	1.0	1.0	0.0	0.0	0.0
SLX4IP	128710	symbol	H. sapiens	128710	H. sapiens	0.0	0.0	0.0	0.0	0.0	0.0	0.0	0.0	0.0	0.0	0.0	0.0	0.0	0.0	0.0	0.0	0.0	0.0	0.0	0.0
SMAD2	4087	symbol	H. sapiens	4087	H. sapiens	0.0	0.0	1.0	0.0	1.0	0.0	0.0	0.0	0.0	0.0	0.0	0.0	0.0	0.0	0.0	0.0	0.0	0.0	0.0	0.0
SMCHD1	23347	symbol	H. sapiens	23347	H. sapiens	0.0	0.0	0.0	1.0	0.0	0.0	0.0	0.0	0.0	0.0	0.0	1.0	0.0	0.0	0.0	1.0	0.0	0.0	1.0	0.0
SMG1	23049	symbol	H. sapiens	23049	H. sapiens	1.0	0.0	0.0	0.0	0.0	0.0	0.0	0.0	0.0	0.0	0.0	1.0	1.0	0.0	0.0	1.0	0.0	0.0	0.0	0.0
SMG6	23293	symbol	H. sapiens	23293	H. sapiens	1.0	0.0	0.0	0.0	0.0	0.0	0.0	0.0	0.0	0.0	0.0	0.0	0.0	0.0	0.0	1.0	0.0	0.0	0.0	0.0
SMG7	9887	symbol	H. sapiens	9887	H. sapiens	1.0	0.0	0.0	0.0	0.0	0.0	0.0	0.0	0.0	0.0	0.0	0.0	0.0	0.0	0.0	0.0	0.0	0.0	0.0	0.0
SMIM15	643155	symbol	H. sapiens	643155	H. sapiens	0.0	0.0	0.0	0.0	0.0	0.0	0.0	0.0	0.0	0.0	0.0	0.0	0.0	0.0	0.0	0.0	0.0	0.0	0.0	0.0
SMU1	55234	symbol	H. sapiens	55234	H. sapiens	1.0	0.0	0.0	0.0	0.0	1.0	0.0	0.0	0.0	0.0	0.0	0.0	0.0	0.0	1.0	0.0	0.0	0.0	0.0	0.0
SMYD2	56950	symbol	H. sapiens	56950	H. sapiens	0.0	0.0	0.0	1.0	0.0	0.0	1.0	0.0	0.0	0.0	0.0	0.0	0.0	0.0	0.0	1.0	0.0	0.0	0.0	0.0
SNAPC3	6619	symbol	H. sapiens	6619	H. sapiens	0.0	1.0	1.0	0.0	0.0	0.0	0.0	0.0	0.0	0.0	0.0	0.0	0.0	0.0	0.0	0.0	0.0	0.0	0.0	0.0
SNAPC5	10302	symbol	H. sapiens	10302	H. sapiens	0.0	1.0	0.0	0.0	0.0	0.0	0.0	0.0	0.0	0.0	0.0	0.0	0.0	0.0	0.0	0.0	0.0	0.0	0.0	0.0
SND1-IT1	27099	symbol	H. sapiens	27099	H. sapiens	0.0	0.0	0.0	0.0	0.0	0.0	0.0	0.0	0.0	0.0	0.0	0.0	0.0	0.0	0.0	0.0	0.0	0.0	0.0	0.0
SNIP1	79753	symbol	H. sapiens	79753	H. sapiens	1.0	0.0	0.0	0.0	0.0	0.0	0.0	0.0	0.0	0.0	0.0	0.0	0.0	0.0	0.0	0.0	0.0	0.0	0.0	0.0
SNORA22	677807	symbol	H. sapiens	677807	H. sapiens	0.0	0.0	0.0	0.0	0.0	0.0	0.0	0.0	0.0	0.0	0.0	0.0	0.0	0.0	0.0	0.0	0.0	0.0	0.0	0.0
SNORA30	677813	symbol	H. sapiens	677813	H. sapiens	0.0	0.0	0.0	0.0	0.0	0.0	0.0	0.0	0.0	0.0	0.0	0.0	0.0	0.0	0.0	0.0	0.0	0.0	0.0	0.0
SNORA38B	100124536	symbol	H. sapiens	100124536	H. sapiens	0.0	0.0	0.0	0.0	0.0	0.0	0.0	0.0	0.0	0.0	0.0	0.0	0.0	0.0	0.0	0.0	0.0	0.0	0.0	0.0
SNORA50A	677830	symbol	H. sapiens	677830	H. sapiens	0.0	0.0	0.0	0.0	0.0	0.0	0.0	0.0	0.0	0.0	0.0	0.0	0.0	0.0	0.0	0.0	0.0	0.0	0.0	0.0
SNORA70B	100124537	symbol	H. sapiens	100124537	H. sapiens	0.0	0.0	0.0	0.0	0.0	0.0	0.0	0.0	0.0	0.0	0.0	0.0	0.0	0.0	0.0	0.0	0.0	0.0	0.0	0.0
SNORA70E	100379250	symbol	H. sapiens	100379250	H. sapiens	0.0	0.0	0.0	0.0	0.0	0.0	0.0	0.0	0.0	0.0	0.0	0.0	0.0	0.0	0.0	0.0	0.0	0.0	0.0	0.0
SNORA7B	677797	symbol	H. sapiens	677797	H. sapiens	0.0	0.0	0.0	0.0	0.0	0.0	0.0	0.0	0.0	0.0	0.0	0.0	0.0	0.0	0.0	0.0	0.0	0.0	0.0	0.0
SNORD13P2	6077	symbol	H. sapiens	6077	H. sapiens	0.0	0.0	0.0	0.0	0.0	0.0	0.0	0.0	0.0	0.0	0.0	0.0	0.0	0.0	0.0	0.0	0.0	0.0	0.0	0.0
SNORD21	6083	symbol	H. sapiens	6083	H. sapiens	0.0	0.0	0.0	0.0	0.0	0.0	0.0	0.0	0.0	0.0	0.0	0.0	0.0	0.0	0.0	0.0	0.0	0.0	0.0	0.0
SNORD30	9299	symbol	H. sapiens	9299	H. sapiens	0.0	0.0	0.0	0.0	0.0	0.0	0.0	0.0	0.0	0.0	0.0	0.0	0.0	0.0	0.0	0.0	0.0	0.0	0.0	0.0
SNORD37	26812	symbol	H. sapiens	26812	H. sapiens	0.0	0.0	0.0	0.0	0.0	0.0	0.0	0.0	0.0	0.0	0.0	0.0	0.0	0.0	0.0	0.0	0.0	0.0	0.0	0.0
SNORD38A	94162	symbol	H. sapiens	94162	H. sapiens	0.0	0.0	0.0	0.0	0.0	0.0	0.0	0.0	0.0	0.0	0.0	0.0	0.0	0.0	0.0	0.0	0.0	0.0	0.0	0.0
SNORD46	94161	symbol	H. sapiens	94161	H. sapiens	0.0	0.0	0.0	0.0	0.0	0.0	0.0	0.0	0.0	0.0	0.0	0.0	0.0	0.0	0.0	0.0	0.0	0.0	0.0	0.0
SNORD56B	319139	symbol	H. sapiens	319139	H. sapiens	0.0	0.0	0.0	0.0	0.0	0.0	0.0	0.0	0.0	0.0	0.0	0.0	0.0	0.0	0.0	0.0	0.0	0.0	0.0	0.0
SNORD75	692195	symbol	H. sapiens	692195	H. sapiens	0.0	0.0	0.0	0.0	0.0	0.0	0.0	0.0	0.0	0.0	0.0	0.0	0.0	0.0	0.0	0.0	0.0	0.0	0.0	0.0
SNORD83A	116937	symbol	H. sapiens	116937	H. sapiens	0.0	0.0	0.0	0.0	0.0	0.0	0.0	0.0	0.0	0.0	0.0	0.0	0.0	0.0	0.0	0.0	0.0	0.0	0.0	0.0
SNORD95	619570	symbol	H. sapiens	619570	H. sapiens	0.0	0.0	0.0	0.0	0.0	0.0	0.0	0.0	0.0	0.0	0.0	0.0	0.0	0.0	0.0	0.0	0.0	0.0	0.0	0.0
SNRPA	6626	symbol	H. sapiens	6626	H. sapiens	1.0	0.0	0.0	0.0	0.0	0.0	0.0	0.0	0.0	0.0	0.0	0.0	0.0	0.0	1.0	0.0	0.0	0.0	0.0	0.0
SNW1	22938	symbol	H. sapiens	22938	H. sapiens	1.0	0.0	1.0	0.0	0.0	1.0	0.0	0.0	0.0	0.0	1.0	1.0	0.0	0.0	1.0	0.0	0.0	0.0	0.0	1.0
SNX9	51429	symbol	H. sapiens	51429	H. sapiens	0.0	0.0	0.0	0.0	0.0	0.0	0.0	0.0	0.0	1.0	0.0	0.0	0.0	0.0	0.0	0.0	1.0	1.0	1.0	0.0
SOCS2	8835	symbol	H. sapiens	8835	H. sapiens	0.0	0.0	0.0	0.0	0.0	0.0	0.0	0.0	0.0	0.0	0.0	0.0	1.0	1.0	0.0	0.0	0.0	1.0	0.0	0.0
SOCS3	9021	symbol	H. sapiens	9021	H. sapiens	0.0	0.0	0.0	0.0	0.0	0.0	0.0	0.0	1.0	0.0	0.0	0.0	1.0	1.0	0.0	0.0	0.0	1.0	0.0	0.0
SORBS2	8470	symbol	H. sapiens	8470	H. sapiens	0.0	0.0	0.0	0.0	0.0	0.0	0.0	0.0	0.0	0.0	0.0	0.0	0.0	0.0	0.0	0.0	0.0	0.0	0.0	0.0
SOS1	6654	symbol	H. sapiens	6654	H. sapiens	0.0	0.0	0.0	0.0	0.0	0.0	0.0	0.0	1.0	0.0	0.0	0.0	0.0	0.0	0.0	0.0	0.0	1.0	0.0	0.0
SOWAHC	65124	symbol	H. sapiens	65124	H. sapiens	0.0	0.0	0.0	0.0	0.0	0.0	0.0	0.0	0.0	0.0	0.0	0.0	0.0	0.0	0.0	0.0	0.0	0.0	0.0	0.0
SOX6	55553	symbol	H. sapiens	55553	H. sapiens	0.0	0.0	0.0	0.0	0.0	0.0	0.0	0.0	0.0	0.0	0.0	0.0	0.0	0.0	0.0	0.0	0.0	0.0	1.0	0.0
SPAG16	79582	symbol	H. sapiens	79582	H. sapiens	0.0	0.0	0.0	0.0	0.0	0.0	0.0	0.0	0.0	0.0	0.0	0.0	0.0	0.0	0.0	0.0	0.0	0.0	0.0	0.0
SPAG7	9552	symbol	H. sapiens	9552	H. sapiens	0.0	0.0	0.0	0.0	0.0	0.0	0.0	0.0	0.0	0.0	0.0	0.0	0.0	0.0	0.0	0.0	0.0	0.0	0.0	0.0
SPOUT1	51490	symbol	H. sapiens	51490	H. sapiens	0.0	0.0	0.0	0.0	0.0	0.0	1.0	0.0	0.0	0.0	0.0	0.0	0.0	0.0	0.0	0.0	1.0	0.0	0.0	0.0
SPR	6697	symbol	H. sapiens	6697	H. sapiens	0.0	1.0	0.0	0.0	0.0	0.0	0.0	0.0	0.0	0.0	0.0	0.0	0.0	0.0	0.0	0.0	0.0	0.0	0.0	0.0
SPRY2	10253	symbol	H. sapiens	10253	H. sapiens	0.0	0.0	0.0	0.0	0.0	0.0	0.0	0.0	1.0	0.0	0.0	0.0	0.0	0.0	0.0	0.0	1.0	1.0	0.0	0.0
SPRY4	81848	symbol	H. sapiens	81848	H. sapiens	0.0	0.0	0.0	0.0	0.0	0.0	0.0	0.0	1.0	0.0	0.0	0.0	0.0	0.0	0.0	0.0	0.0	1.0	0.0	0.0
SQRDL	58472	gene_synonym	H. sapiens	58472	H. sapiens	0.0	0.0	0.0	0.0	0.0	0.0	0.0	1.0	0.0	0.0	0.0	0.0	0.0	0.0	0.0	0.0	0.0	0.0	0.0	0.0
SRF	6722	symbol	H. sapiens	6722	H. sapiens	0.0	0.0	1.0	0.0	0.0	0.0	0.0	0.0	0.0	0.0	0.0	0.0	0.0	0.0	0.0	0.0	0.0	0.0	1.0	0.0
SRP68	6730	symbol	H. sapiens	6730	H. sapiens	1.0	0.0	0.0	0.0	0.0	0.0	0.0	0.0	0.0	0.0	0.0	0.0	0.0	0.0	0.0	0.0	0.0	0.0	0.0	0.0
SRP9	6726	symbol	H. sapiens	6726	H. sapiens	1.0	0.0	0.0	0.0	0.0	0.0	0.0	0.0	0.0	0.0	0.0	0.0	0.0	0.0	1.0	0.0	0.0	0.0	0.0	0.0
SRRM2	23524	symbol	H. sapiens	23524	H. sapiens	1.0	0.0	0.0	0.0	0.0	1.0	0.0	0.0	0.0	0.0	0.0	0.0	0.0	0.0	0.0	0.0	0.0	0.0	0.0	0.0
SRXN1	140809	symbol	H. sapiens	140809	H. sapiens	0.0	0.0	0.0	0.0	0.0	0.0	0.0	0.0	0.0	0.0	0.0	0.0	0.0	0.0	0.0	0.0	0.0	0.0	0.0	0.0
SSH1	54434	symbol	H. sapiens	54434	H. sapiens	0.0	0.0	0.0	0.0	0.0	0.0	0.0	0.0	0.0	0.0	0.0	0.0	0.0	0.0	0.0	0.0	0.0	0.0	0.0	0.0
STAG3L4	64940	symbol	H. sapiens	64940	H. sapiens	0.0	0.0	0.0	0.0	0.0	0.0	0.0	0.0	0.0	0.0	0.0	0.0	0.0	0.0	0.0	0.0	1.0	0.0	0.0	0.0
STARD7	56910	symbol	H. sapiens	56910	H. sapiens	0.0	0.0	0.0	0.0	0.0	0.0	0.0	1.0	0.0	0.0	0.0	0.0	0.0	0.0	0.0	0.0	0.0	0.0	0.0	0.0
STAT6	6778	symbol	H. sapiens	6778	H. sapiens	0.0	0.0	1.0	0.0	0.0	0.0	0.0	0.0	0.0	0.0	0.0	0.0	0.0	0.0	0.0	1.0	0.0	0.0	0.0	0.0
STK16	8576	symbol	H. sapiens	8576	H. sapiens	0.0	0.0	0.0	0.0	0.0	0.0	0.0	0.0	0.0	0.0	0.0	0.0	0.0	0.0	0.0	0.0	0.0	0.0	0.0	0.0
STK38	11329	symbol	H. sapiens	11329	H. sapiens	0.0	0.0	0.0	0.0	0.0	0.0	0.0	0.0	1.0	0.0	0.0	0.0	0.0	0.0	0.0	0.0	0.0	1.0	0.0	0.0
STK40	83931	symbol	H. sapiens	83931	H. sapiens	0.0	0.0	0.0	0.0	0.0	0.0	0.0	0.0	0.0	0.0	0.0	0.0	0.0	0.0	0.0	0.0	0.0	0.0	0.0	0.0
STOML2	30968	symbol	H. sapiens	30968	H. sapiens	0.0	1.0	0.0	0.0	0.0	0.0	0.0	1.0	0.0	0.0	0.0	0.0	0.0	0.0	0.0	0.0	0.0	0.0	0.0	0.0
STUB1	10273	symbol	H. sapiens	10273	H. sapiens	0.0	0.0	0.0	0.0	0.0	0.0	0.0	0.0	0.0	1.0	0.0	1.0	1.0	1.0	0.0	0.0	0.0	1.0	1.0	0.0
STXBP5	134957	symbol	H. sapiens	134957	H. sapiens	0.0	0.0	0.0	0.0	0.0	0.0	0.0	0.0	0.0	0.0	0.0	0.0	0.0	0.0	0.0	0.0	0.0	0.0	0.0	0.0
SUFU	51684	symbol	H. sapiens	51684	H. sapiens	0.0	0.0	1.0	0.0	0.0	0.0	0.0	0.0	0.0	1.0	1.0	0.0	0.0	0.0	0.0	0.0	0.0	0.0	0.0	0.0
SUGP2	10147	symbol	H. sapiens	10147	H. sapiens	1.0	0.0	0.0	0.0	0.0	0.0	0.0	0.0	0.0	0.0	0.0	0.0	0.0	0.0	0.0	0.0	0.0	0.0	0.0	0.0
SUMF2	25870	symbol	H. sapiens	25870	H. sapiens	0.0	0.0	0.0	0.0	0.0	0.0	0.0	0.0	0.0	0.0	0.0	0.0	0.0	0.0	0.0	0.0	0.0	0.0	0.0	0.0
SURF1	6834	symbol	H. sapiens	6834	H. sapiens	0.0	0.0	0.0	0.0	0.0	0.0	0.0	1.0	0.0	0.0	0.0	0.0	0.0	0.0	0.0	0.0	0.0	0.0	0.0	0.0
SYF2	25949	symbol	H. sapiens	25949	H. sapiens	1.0	0.0	0.0	0.0	0.0	1.0	0.0	0.0	0.0	0.0	0.0	1.0	0.0	0.0	0.0	0.0	1.0	0.0	0.0	0.0
SYNCRIP	10492	symbol	H. sapiens	10492	H. sapiens	1.0	0.0	0.0	0.0	0.0	0.0	0.0	0.0	0.0	0.0	0.0	0.0	0.0	0.0	1.0	0.0	0.0	0.0	0.0	0.0
TAF15	8148	symbol	H. sapiens	8148	H. sapiens	1.0	0.0	0.0	0.0	0.0	0.0	0.0	0.0	0.0	0.0	1.0	0.0	0.0	0.0	1.0	0.0	0.0	0.0	0.0	0.0
TAF7	6879	symbol	H. sapiens	6879	H. sapiens	1.0	1.0	1.0	0.0	0.0	0.0	1.0	0.0	1.0	0.0	0.0	0.0	1.0	0.0	0.0	0.0	0.0	1.0	0.0	1.0
TAMM41	132001	symbol	H. sapiens	132001	H. sapiens	0.0	0.0	0.0	0.0	0.0	0.0	0.0	1.0	0.0	0.0	0.0	0.0	0.0	0.0	0.0	0.0	0.0	0.0	0.0	0.0
TAPT1-AS1	202020	symbol	H. sapiens	202020	H. sapiens	0.0	0.0	0.0	0.0	0.0	0.0	0.0	0.0	0.0	0.0	0.0	0.0	0.0	0.0	0.0	0.0	0.0	0.0	0.0	0.0
TAS2R10	50839	symbol	H. sapiens	50839	H. sapiens	0.0	0.0	0.0	0.0	0.0	0.0	0.0	0.0	0.0	0.0	0.0	0.0	0.0	0.0	0.0	0.0	0.0	0.0	0.0	0.0
TAS2R13	50838	symbol	H. sapiens	50838	H. sapiens	0.0	0.0	0.0	0.0	0.0	0.0	0.0	0.0	0.0	0.0	0.0	0.0	0.0	0.0	0.0	0.0	0.0	0.0	0.0	0.0
TAS2R19	259294	symbol	H. sapiens	259294	H. sapiens	0.0	0.0	0.0	0.0	0.0	0.0	0.0	0.0	0.0	0.0	0.0	0.0	0.0	0.0	0.0	0.0	0.0	0.0	0.0	0.0
TAS2R20	259295	symbol	H. sapiens	259295	H. sapiens	0.0	0.0	0.0	0.0	0.0	0.0	0.0	0.0	0.0	0.0	0.0	0.0	0.0	0.0	0.0	0.0	0.0	0.0	0.0	0.0
TAS2R3	50831	symbol	H. sapiens	50831	H. sapiens	0.0	0.0	0.0	0.0	0.0	0.0	0.0	0.0	0.0	0.0	0.0	0.0	0.0	0.0	0.0	0.0	0.0	0.0	0.0	0.0
TAS2R31	259290	symbol	H. sapiens	259290	H. sapiens	0.0	0.0	0.0	0.0	0.0	0.0	0.0	0.0	0.0	0.0	0.0	0.0	0.0	0.0	0.0	0.0	0.0	0.0	0.0	0.0
TAS2R4	50832	symbol	H. sapiens	50832	H. sapiens	0.0	0.0	0.0	0.0	0.0	0.0	0.0	0.0	0.0	0.0	0.0	0.0	0.0	0.0	0.0	0.0	0.0	0.0	0.0	0.0
TAS2R45	259291	symbol	H. sapiens	259291	H. sapiens	0.0	0.0	0.0	0.0	0.0	0.0	0.0	0.0	0.0	0.0	0.0	0.0	0.0	0.0	0.0	0.0	0.0	0.0	0.0	0.0
TAS2R50	259296	symbol	H. sapiens	259296	H. sapiens	0.0	0.0	0.0	0.0	0.0	0.0	0.0	0.0	0.0	0.0	0.0	0.0	0.0	0.0	0.0	0.0	0.0	0.0	0.0	0.0
TBCB	1155	symbol	H. sapiens	1155	H. sapiens	0.0	0.0	0.0	0.0	0.0	0.0	0.0	0.0	0.0	0.0	0.0	0.0	0.0	0.0	0.0	0.0	0.0	0.0	0.0	0.0
TBL3	10607	symbol	H. sapiens	10607	H. sapiens	1.0	0.0	0.0	0.0	1.0	0.0	0.0	0.0	0.0	0.0	0.0	0.0	0.0	0.0	0.0	0.0	0.0	0.0	0.0	0.0
TBRG4	9238	symbol	H. sapiens	9238	H. sapiens	1.0	0.0	0.0	0.0	0.0	0.0	0.0	1.0	0.0	0.0	0.0	0.0	0.0	0.0	1.0	0.0	0.0	0.0	0.0	0.0
TBX19	9095	symbol	H. sapiens	9095	H. sapiens	0.0	0.0	1.0	0.0	0.0	0.0	0.0	0.0	0.0	0.0	0.0	0.0	0.0	0.0	0.0	0.0	0.0	0.0	0.0	0.0
TCAF1	9747	symbol	H. sapiens	9747	H. sapiens	0.0	0.0	0.0	0.0	0.0	0.0	0.0	0.0	0.0	0.0	0.0	0.0	0.0	0.0	0.0	0.0	0.0	0.0	0.0	0.0
TCEAL4	79921	symbol	H. sapiens	79921	H. sapiens	0.0	0.0	0.0	0.0	0.0	0.0	0.0	0.0	0.0	0.0	0.0	0.0	0.0	0.0	0.0	0.0	0.0	0.0	0.0	0.0
TCN2	6948	symbol	H. sapiens	6948	H. sapiens	0.0	0.0	0.0	0.0	0.0	0.0	0.0	0.0	0.0	0.0	0.0	0.0	0.0	0.0	0.0	0.0	0.0	0.0	0.0	0.0
TCP11L2	255394	symbol	H. sapiens	255394	H. sapiens	0.0	0.0	0.0	0.0	0.0	0.0	0.0	0.0	0.0	0.0	0.0	0.0	0.0	0.0	0.0	0.0	0.0	0.0	0.0	0.0
TEAD3	7005	symbol	H. sapiens	7005	H. sapiens	0.0	0.0	1.0	0.0	0.0	0.0	0.0	0.0	0.0	0.0	0.0	0.0	0.0	0.0	0.0	0.0	1.0	0.0	0.0	0.0
TECR	9524	symbol	H. sapiens	9524	H. sapiens	0.0	1.0	0.0	0.0	0.0	0.0	0.0	0.0	0.0	0.0	0.0	0.0	0.0	0.0	0.0	0.0	0.0	0.0	0.0	0.0
TEFM	79736	symbol	H. sapiens	79736	H. sapiens	1.0	1.0	0.0	0.0	0.0	0.0	0.0	1.0	0.0	0.0	0.0	0.0	0.0	0.0	0.0	0.0	0.0	0.0	0.0	0.0
TEP1	7011	symbol	H. sapiens	7011	H. sapiens	1.0	1.0	0.0	0.0	0.0	0.0	0.0	0.0	0.0	0.0	0.0	1.0	0.0	0.0	0.0	0.0	0.0	0.0	0.0	0.0
TERF2IP	54386	symbol	H. sapiens	54386	H. sapiens	0.0	1.0	0.0	0.0	0.0	0.0	0.0	0.0	1.0	0.0	0.0	1.0	0.0	0.0	0.0	1.0	0.0	1.0	0.0	0.0
TET2	54790	symbol	H. sapiens	54790	H. sapiens	0.0	0.0	0.0	1.0	0.0	0.0	1.0	0.0	0.0	0.0	0.0	1.0	0.0	0.0	0.0	0.0	0.0	0.0	0.0	0.0
TEX264	51368	symbol	H. sapiens	51368	H. sapiens	0.0	0.0	0.0	0.0	0.0	0.0	0.0	0.0	0.0	0.0	0.0	1.0	0.0	0.0	0.0	0.0	0.0	0.0	0.0	0.0
TFAM	7019	symbol	H. sapiens	7019	H. sapiens	0.0	1.0	1.0	0.0	0.0	0.0	0.0	1.0	0.0	0.0	0.0	0.0	0.0	0.0	0.0	0.0	0.0	0.0	0.0	0.0
TFB2M	64216	symbol	H. sapiens	64216	H. sapiens	0.0	1.0	0.0	0.0	1.0	0.0	1.0	1.0	0.0	0.0	1.0	0.0	0.0	0.0	0.0	0.0	0.0	0.0	0.0	0.0
TFPT	29844	symbol	H. sapiens	29844	H. sapiens	0.0	0.0	0.0	1.0	0.0	0.0	0.0	0.0	0.0	0.0	0.0	1.0	0.0	0.0	0.0	1.0	0.0	0.0	0.0	0.0
TGDS	23483	symbol	H. sapiens	23483	H. sapiens	0.0	0.0	0.0	0.0	0.0	0.0	0.0	0.0	0.0	0.0	0.0	0.0	0.0	0.0	0.0	0.0	0.0	0.0	0.0	0.0
THAP4	51078	symbol	H. sapiens	51078	H. sapiens	0.0	0.0	0.0	0.0	0.0	0.0	0.0	0.0	0.0	0.0	0.0	0.0	0.0	0.0	0.0	0.0	0.0	0.0	0.0	0.0
THOC6	79228	symbol	H. sapiens	79228	H. sapiens	1.0	0.0	0.0	0.0	0.0	1.0	0.0	0.0	0.0	0.0	0.0	0.0	0.0	0.0	0.0	0.0	0.0	0.0	0.0	0.0
THSD7A	221981	symbol	H. sapiens	221981	H. sapiens	0.0	0.0	0.0	0.0	0.0	0.0	0.0	0.0	0.0	0.0	0.0	0.0	0.0	0.0	0.0	0.0	0.0	0.0	0.0	0.0
THTPA	79178	symbol	H. sapiens	79178	H. sapiens	0.0	0.0	0.0	0.0	0.0	0.0	0.0	0.0	0.0	0.0	0.0	0.0	0.0	0.0	0.0	0.0	0.0	0.0	0.0	0.0
THUMPD1	55623	symbol	H. sapiens	55623	H. sapiens	0.0	0.0	0.0	0.0	1.0	0.0	0.0	0.0	0.0	0.0	0.0	0.0	0.0	0.0	0.0	0.0	0.0	0.0	0.0	0.0
TIA1	7072	symbol	H. sapiens	7072	H. sapiens	0.0	0.0	0.0	0.0	0.0	0.0	0.0	0.0	0.0	0.0	0.0	0.0	0.0	0.0	1.0	0.0	0.0	0.0	0.0	0.0
TIMM8B	26521	symbol	H. sapiens	26521	H. sapiens	0.0	0.0	0.0	0.0	0.0	0.0	0.0	1.0	0.0	0.0	0.0	0.0	0.0	0.0	0.0	0.0	0.0	0.0	0.0	0.0
TIPARP	25976	symbol	H. sapiens	25976	H. sapiens	0.0	0.0	0.0	0.0	0.0	0.0	0.0	0.0	0.0	1.0	0.0	0.0	0.0	0.0	0.0	0.0	0.0	0.0	0.0	0.0
TMCO6	55374	symbol	H. sapiens	55374	H. sapiens	0.0	0.0	0.0	0.0	0.0	0.0	0.0	0.0	0.0	0.0	0.0	0.0	0.0	0.0	0.0	0.0	0.0	0.0	0.0	0.0
TMEM106A	113277	symbol	H. sapiens	113277	H. sapiens	0.0	0.0	0.0	0.0	0.0	0.0	0.0	0.0	0.0	0.0	0.0	0.0	0.0	0.0	0.0	0.0	0.0	0.0	0.0	0.0
TMEM120A	83862	symbol	H. sapiens	83862	H. sapiens	0.0	0.0	0.0	0.0	0.0	0.0	0.0	1.0	0.0	0.0	0.0	0.0	0.0	0.0	0.0	0.0	0.0	0.0	0.0	0.0
TMEM120B	144404	symbol	H. sapiens	144404	H. sapiens	0.0	0.0	0.0	0.0	0.0	0.0	0.0	1.0	0.0	0.0	0.0	0.0	0.0	0.0	0.0	0.0	0.0	0.0	0.0	0.0
TMEM169	92691	symbol	H. sapiens	92691	H. sapiens	0.0	0.0	0.0	0.0	0.0	0.0	0.0	0.0	0.0	0.0	0.0	0.0	0.0	0.0	0.0	0.0	0.0	0.0	0.0	0.0
TMEM192	201931	symbol	H. sapiens	201931	H. sapiens	0.0	0.0	0.0	0.0	0.0	0.0	0.0	0.0	0.0	0.0	0.0	0.0	0.0	0.0	0.0	0.0	0.0	0.0	1.0	0.0
TMEM222	84065	symbol	H. sapiens	84065	H. sapiens	0.0	0.0	0.0	0.0	0.0	0.0	0.0	0.0	0.0	0.0	0.0	0.0	0.0	0.0	0.0	0.0	0.0	0.0	0.0	0.0
TMEM30A	55754	symbol	H. sapiens	55754	H. sapiens	0.0	0.0	0.0	0.0	0.0	0.0	0.0	0.0	0.0	0.0	0.0	0.0	0.0	0.0	0.0	0.0	0.0	0.0	0.0	0.0
TMEM45A	55076	symbol	H. sapiens	55076	H. sapiens	0.0	0.0	0.0	0.0	0.0	0.0	0.0	0.0	0.0	0.0	0.0	0.0	0.0	0.0	0.0	0.0	0.0	0.0	0.0	0.0
TMEM57	55219	gene_synonym	H. sapiens	55219	H. sapiens	0.0	0.0	0.0	0.0	0.0	0.0	0.0	0.0	0.0	0.0	0.0	0.0	0.0	0.0	0.0	0.0	0.0	0.0	0.0	0.0
TMX4	56255	symbol	H. sapiens	56255	H. sapiens	0.0	0.0	0.0	0.0	0.0	0.0	0.0	1.0	0.0	0.0	0.0	0.0	0.0	0.0	0.0	0.0	0.0	0.0	0.0	0.0
TNFRSF10B	8795	symbol	H. sapiens	8795	H. sapiens	0.0	0.0	0.0	0.0	0.0	0.0	0.0	0.0	0.0	0.0	0.0	0.0	0.0	0.0	0.0	0.0	0.0	1.0	0.0	0.0
TNKS	8658	symbol	H. sapiens	8658	H. sapiens	0.0	0.0	0.0	0.0	0.0	0.0	0.0	0.0	0.0	0.0	0.0	0.0	0.0	1.0	0.0	1.0	1.0	1.0	0.0	0.0
TNRC6A	27327	symbol	H. sapiens	27327	H. sapiens	1.0	0.0	0.0	0.0	0.0	0.0	0.0	0.0	0.0	1.0	0.0	0.0	0.0	0.0	1.0	0.0	0.0	0.0	0.0	0.0
TNRC6C	57690	symbol	H. sapiens	57690	H. sapiens	0.0	0.0	0.0	0.0	0.0	0.0	0.0	0.0	0.0	1.0	0.0	0.0	0.0	0.0	1.0	0.0	0.0	0.0	0.0	0.0
TNS1	7145	symbol	H. sapiens	7145	H. sapiens	0.0	0.0	0.0	0.0	0.0	0.0	0.0	0.0	0.0	0.0	0.0	0.0	0.0	0.0	0.0	0.0	0.0	0.0	0.0	0.0
TOB2	10766	symbol	H. sapiens	10766	H. sapiens	0.0	0.0	1.0	0.0	0.0	0.0	0.0	0.0	0.0	0.0	1.0	0.0	0.0	0.0	0.0	0.0	0.0	0.0	0.0	0.0
TOE1	114034	symbol	H. sapiens	114034	H. sapiens	0.0	0.0	0.0	0.0	1.0	1.0	0.0	0.0	0.0	0.0	0.0	0.0	0.0	0.0	0.0	0.0	0.0	0.0	0.0	0.0
TOM1L1	10040	symbol	H. sapiens	10040	H. sapiens	0.0	0.0	0.0	0.0	0.0	0.0	0.0	0.0	0.0	0.0	0.0	0.0	0.0	1.0	0.0	0.0	0.0	1.0	0.0	0.0
TOMM34	10953	symbol	H. sapiens	10953	H. sapiens	0.0	0.0	0.0	0.0	0.0	0.0	0.0	1.0	0.0	0.0	0.0	0.0	0.0	0.0	0.0	0.0	0.0	0.0	0.0	0.0
TOP1MT	116447	symbol	H. sapiens	116447	H. sapiens	0.0	0.0	0.0	0.0	0.0	0.0	0.0	1.0	0.0	0.0	0.0	1.0	0.0	0.0	0.0	0.0	0.0	0.0	0.0	0.0
TOR1AIP2	163590	symbol	H. sapiens	163590	H. sapiens	0.0	0.0	0.0	0.0	0.0	0.0	0.0	0.0	0.0	0.0	0.0	0.0	0.0	0.0	0.0	0.0	0.0	0.0	0.0	0.0
TOR1B	27348	symbol	H. sapiens	27348	H. sapiens	0.0	0.0	0.0	0.0	0.0	0.0	0.0	0.0	0.0	0.0	0.0	0.0	0.0	0.0	0.0	0.0	0.0	0.0	0.0	0.0
TOX	9760	symbol	H. sapiens	9760	H. sapiens	0.0	0.0	0.0	1.0	0.0	0.0	0.0	0.0	0.0	0.0	0.0	0.0	0.0	0.0	0.0	1.0	0.0	0.0	0.0	0.0
TPD52L2	7165	symbol	H. sapiens	7165	H. sapiens	0.0	0.0	0.0	0.0	0.0	0.0	0.0	0.0	0.0	0.0	0.0	0.0	0.0	0.0	0.0	0.0	0.0	0.0	0.0	0.0
TPI1	7167	symbol	H. sapiens	7167	H. sapiens	0.0	0.0	0.0	0.0	0.0	0.0	0.0	0.0	0.0	0.0	0.0	0.0	0.0	0.0	0.0	0.0	0.0	0.0	1.0	0.0
TPST1	8460	symbol	H. sapiens	8460	H. sapiens	0.0	0.0	0.0	0.0	0.0	0.0	0.0	0.0	0.0	0.0	0.0	0.0	0.0	0.0	0.0	0.0	0.0	0.0	1.0	0.0
TPT1	7178	symbol	H. sapiens	7178	H. sapiens	0.0	0.0	1.0	0.0	0.0	0.0	0.0	0.0	1.0	0.0	0.0	0.0	0.0	0.0	0.0	1.0	0.0	0.0	0.0	0.0
TPT1-AS1	100190939	symbol	H. sapiens	100190939	H. sapiens	0.0	0.0	0.0	0.0	0.0	0.0	0.0	0.0	0.0	0.0	0.0	0.0	0.0	0.0	0.0	0.0	0.0	0.0	0.0	0.0
TRA2A	29896	symbol	H. sapiens	29896	H. sapiens	1.0	0.0	0.0	0.0	0.0	0.0	0.0	0.0	0.0	0.0	0.0	0.0	0.0	0.0	1.0	0.0	0.0	0.0	0.0	0.0
TRAF3IP1	26146	symbol	H. sapiens	26146	H. sapiens	0.0	0.0	0.0	0.0	0.0	0.0	0.0	0.0	1.0	0.0	0.0	0.0	0.0	0.0	0.0	0.0	0.0	0.0	0.0	0.0
TRAF3IP3	80342	symbol	H. sapiens	80342	H. sapiens	0.0	0.0	0.0	0.0	0.0	0.0	0.0	1.0	0.0	0.0	0.0	0.0	0.0	0.0	0.0	0.0	0.0	0.0	0.0	0.0
TRAP1	10131	symbol	H. sapiens	10131	H. sapiens	0.0	0.0	0.0	0.0	0.0	0.0	0.0	1.0	1.0	0.0	0.0	0.0	0.0	0.0	1.0	1.0	0.0	0.0	0.0	0.0
TRAPPC3	27095	symbol	H. sapiens	27095	H. sapiens	0.0	0.0	0.0	0.0	0.0	0.0	0.0	0.0	0.0	0.0	0.0	0.0	1.0	0.0	0.0	0.0	0.0	0.0	0.0	0.0
TRIB1	10221	symbol	H. sapiens	10221	H. sapiens	0.0	0.0	1.0	0.0	0.0	0.0	0.0	0.0	1.0	1.0	0.0	0.0	0.0	0.0	0.0	0.0	0.0	1.0	0.0	0.0
TRIB3	57761	symbol	H. sapiens	57761	H. sapiens	0.0	0.0	0.0	0.0	0.0	0.0	0.0	0.0	1.0	1.0	1.0	0.0	0.0	0.0	0.0	0.0	0.0	1.0	0.0	0.0
TRIM15	89870	symbol	H. sapiens	89870	H. sapiens	0.0	0.0	0.0	0.0	0.0	0.0	0.0	0.0	0.0	0.0	1.0	0.0	0.0	1.0	0.0	0.0	0.0	0.0	0.0	0.0
TRIM2	23321	symbol	H. sapiens	23321	H. sapiens	0.0	0.0	0.0	0.0	0.0	0.0	0.0	0.0	0.0	0.0	0.0	0.0	0.0	1.0	0.0	0.0	0.0	0.0	0.0	0.0
TRIM26	7726	symbol	H. sapiens	7726	H. sapiens	0.0	0.0	0.0	0.0	0.0	0.0	0.0	0.0	0.0	0.0	0.0	0.0	0.0	1.0	0.0	0.0	0.0	0.0	0.0	0.0
TRIM44	54765	symbol	H. sapiens	54765	H. sapiens	0.0	0.0	0.0	0.0	0.0	0.0	0.0	0.0	1.0	0.0	0.0	0.0	0.0	1.0	0.0	0.0	0.0	0.0	0.0	0.0
TRIM66	9866	symbol	H. sapiens	9866	H. sapiens	0.0	0.0	0.0	0.0	0.0	0.0	0.0	0.0	0.0	0.0	0.0	0.0	0.0	0.0	0.0	0.0	0.0	0.0	0.0	0.0
TRMT1	55621	symbol	H. sapiens	55621	H. sapiens	0.0	0.0	0.0	0.0	1.0	0.0	1.0	0.0	0.0	0.0	0.0	0.0	0.0	0.0	0.0	0.0	0.0	0.0	0.0	0.0
TRMT13	54482	symbol	H. sapiens	54482	H. sapiens	0.0	0.0	0.0	0.0	1.0	0.0	1.0	0.0	0.0	0.0	0.0	0.0	0.0	0.0	0.0	0.0	0.0	0.0	0.0	0.0
TSN	7247	symbol	H. sapiens	7247	H. sapiens	0.0	0.0	0.0	0.0	0.0	0.0	0.0	0.0	0.0	0.0	0.0	1.0	0.0	0.0	0.0	0.0	0.0	0.0	0.0	0.0
TSPAN1	10103	symbol	H. sapiens	10103	H. sapiens	0.0	0.0	0.0	0.0	0.0	0.0	0.0	0.0	0.0	0.0	0.0	0.0	0.0	0.0	0.0	0.0	0.0	0.0	0.0	0.0
TSPAN9	10867	symbol	H. sapiens	10867	H. sapiens	0.0	0.0	0.0	0.0	0.0	0.0	0.0	0.0	0.0	0.0	0.0	0.0	0.0	0.0	0.0	0.0	0.0	0.0	0.0	0.0
TSR2	90121	symbol	H. sapiens	90121	H. sapiens	0.0	0.0	0.0	0.0	1.0	0.0	0.0	0.0	0.0	0.0	0.0	0.0	0.0	0.0	0.0	0.0	0.0	0.0	0.0	0.0
TTC17	55761	symbol	H. sapiens	55761	H. sapiens	0.0	0.0	0.0	0.0	0.0	0.0	0.0	0.0	0.0	0.0	0.0	0.0	0.0	0.0	0.0	0.0	0.0	0.0	0.0	0.0
TTC21A	199223	symbol	H. sapiens	199223	H. sapiens	0.0	0.0	0.0	0.0	0.0	0.0	0.0	0.0	0.0	0.0	0.0	0.0	0.0	0.0	0.0	0.0	0.0	0.0	0.0	0.0
TTC22	55001	symbol	H. sapiens	55001	H. sapiens	0.0	0.0	0.0	0.0	0.0	0.0	0.0	0.0	0.0	0.0	0.0	0.0	0.0	0.0	0.0	0.0	0.0	0.0	0.0	0.0
TTC28	23331	symbol	H. sapiens	23331	H. sapiens	0.0	0.0	0.0	0.0	0.0	0.0	0.0	0.0	0.0	0.0	0.0	0.0	0.0	0.0	0.0	0.0	1.0	0.0	0.0	0.0
TTC30A	92104	symbol	H. sapiens	92104	H. sapiens	0.0	0.0	0.0	0.0	0.0	0.0	0.0	0.0	0.0	0.0	0.0	0.0	0.0	0.0	0.0	0.0	0.0	0.0	0.0	0.0
TTC30B	150737	symbol	H. sapiens	150737	H. sapiens	0.0	0.0	0.0	0.0	0.0	0.0	0.0	0.0	0.0	0.0	0.0	0.0	0.0	0.0	0.0	0.0	0.0	0.0	0.0	0.0
TTC6	319089	symbol	H. sapiens	319089	H. sapiens	0.0	0.0	0.0	0.0	0.0	0.0	0.0	0.0	0.0	0.0	0.0	0.0	0.0	0.0	0.0	0.0	0.0	0.0	0.0	0.0
TTC7B	145567	symbol	H. sapiens	145567	H. sapiens	0.0	0.0	0.0	0.0	0.0	0.0	0.0	0.0	0.0	0.0	0.0	0.0	0.0	0.0	0.0	0.0	0.0	0.0	0.0	0.0
TTC9C	283237	symbol	H. sapiens	283237	H. sapiens	0.0	0.0	0.0	0.0	0.0	0.0	0.0	0.0	0.0	0.0	0.0	0.0	0.0	0.0	0.0	0.0	0.0	0.0	0.0	0.0
TTLL5	23093	symbol	H. sapiens	23093	H. sapiens	0.0	0.0	0.0	0.0	0.0	0.0	0.0	0.0	0.0	0.0	0.0	0.0	0.0	0.0	0.0	0.0	0.0	0.0	0.0	0.0
TTN	7273	symbol	H. sapiens	7273	H. sapiens	0.0	0.0	0.0	0.0	0.0	0.0	0.0	0.0	0.0	0.0	0.0	0.0	0.0	0.0	0.0	0.0	1.0	1.0	0.0	0.0
TUBG2	27175	symbol	H. sapiens	27175	H. sapiens	0.0	0.0	0.0	0.0	0.0	0.0	0.0	0.0	0.0	0.0	0.0	0.0	0.0	0.0	0.0	0.0	1.0	0.0	0.0	0.0
TUSC2	11334	symbol	H. sapiens	11334	H. sapiens	0.0	0.0	0.0	0.0	0.0	0.0	0.0	0.0	0.0	0.0	0.0	0.0	0.0	0.0	0.0	0.0	0.0	0.0	0.0	0.0
TXN2	25828	symbol	H. sapiens	25828	H. sapiens	0.0	0.0	0.0	0.0	0.0	0.0	0.0	1.0	0.0	0.0	0.0	0.0	0.0	0.0	0.0	0.0	0.0	0.0	0.0	0.0
TYROBP	7305	symbol	H. sapiens	7305	H. sapiens	0.0	0.0	0.0	0.0	0.0	0.0	0.0	0.0	0.0	0.0	0.0	0.0	0.0	0.0	0.0	0.0	0.0	0.0	1.0	0.0
U2AF2	11338	symbol	H. sapiens	11338	H. sapiens	1.0	0.0	0.0	0.0	0.0	1.0	0.0	0.0	1.0	0.0	0.0	0.0	0.0	0.0	1.0	0.0	0.0	0.0	0.0	0.0
UAP1	6675	symbol	H. sapiens	6675	H. sapiens	0.0	1.0	0.0	0.0	0.0	0.0	0.0	0.0	0.0	0.0	0.0	0.0	0.0	0.0	0.0	0.0	0.0	0.0	0.0	0.0
UBA2	10054	symbol	H. sapiens	10054	H. sapiens	0.0	0.0	0.0	0.0	0.0	0.0	1.0	0.0	0.0	0.0	0.0	0.0	0.0	1.0	0.0	0.0	0.0	0.0	0.0	0.0
UBAC1	10422	symbol	H. sapiens	10422	H. sapiens	0.0	0.0	0.0	0.0	0.0	0.0	0.0	0.0	0.0	0.0	0.0	0.0	0.0	1.0	0.0	0.0	0.0	0.0	0.0	0.0
UBE2L3	7332	symbol	H. sapiens	7332	H. sapiens	0.0	0.0	0.0	0.0	0.0	0.0	0.0	0.0	0.0	0.0	1.0	0.0	1.0	1.0	0.0	0.0	0.0	1.0	0.0	0.0
UBE2S	27338	symbol	H. sapiens	27338	H. sapiens	0.0	0.0	0.0	0.0	0.0	0.0	0.0	0.0	0.0	0.0	0.0	0.0	1.0	1.0	0.0	0.0	1.0	1.0	0.0	0.0
UBE2T	29089	symbol	H. sapiens	29089	H. sapiens	0.0	0.0	0.0	0.0	0.0	0.0	0.0	0.0	0.0	0.0	0.0	1.0	0.0	1.0	0.0	0.0	0.0	0.0	0.0	0.0
UBL3	5412	symbol	H. sapiens	5412	H. sapiens	0.0	0.0	0.0	0.0	0.0	0.0	0.0	0.0	0.0	0.0	0.0	0.0	0.0	0.0	0.0	0.0	0.0	0.0	0.0	0.0
UBL4A	8266	symbol	H. sapiens	8266	H. sapiens	0.0	0.0	0.0	0.0	0.0	0.0	0.0	0.0	0.0	0.0	0.0	0.0	0.0	1.0	0.0	0.0	0.0	0.0	0.0	0.0
UBL5	59286	symbol	H. sapiens	59286	H. sapiens	1.0	0.0	0.0	0.0	0.0	0.0	0.0	0.0	0.0	0.0	0.0	0.0	0.0	0.0	0.0	0.0	0.0	0.0	0.0	0.0
UBN2	254048	symbol	H. sapiens	254048	H. sapiens	0.0	0.0	0.0	1.0	0.0	0.0	0.0	0.0	0.0	0.0	0.0	0.0	0.0	0.0	0.0	0.0	0.0	0.0	0.0	0.0
UBR7	55148	symbol	H. sapiens	55148	H. sapiens	0.0	0.0	0.0	0.0	0.0	0.0	0.0	0.0	0.0	0.0	0.0	0.0	0.0	1.0	0.0	0.0	0.0	0.0	0.0	0.0
UBTF	7343	symbol	H. sapiens	7343	H. sapiens	0.0	1.0	0.0	0.0	0.0	0.0	0.0	0.0	0.0	0.0	0.0	0.0	0.0	0.0	0.0	0.0	0.0	0.0	0.0	0.0
UBXN6	80700	symbol	H. sapiens	80700	H. sapiens	0.0	0.0	0.0	0.0	0.0	0.0	0.0	0.0	0.0	0.0	0.0	0.0	0.0	1.0	0.0	0.0	0.0	0.0	0.0	0.0
UBXN8	7993	symbol	H. sapiens	7993	H. sapiens	0.0	0.0	0.0	0.0	0.0	0.0	0.0	0.0	0.0	0.0	0.0	0.0	1.0	1.0	0.0	0.0	0.0	0.0	0.0	0.0
UGT2A3	79799	symbol	H. sapiens	79799	H. sapiens	0.0	0.0	0.0	0.0	0.0	0.0	0.0	0.0	0.0	0.0	0.0	0.0	0.0	0.0	0.0	0.0	0.0	0.0	0.0	0.0
UHMK1	127933	symbol	H. sapiens	127933	H. sapiens	0.0	0.0	0.0	0.0	0.0	0.0	0.0	0.0	0.0	0.0	0.0	0.0	0.0	0.0	1.0	0.0	0.0	0.0	0.0	0.0
UIMC1	51720	symbol	H. sapiens	51720	H. sapiens	0.0	0.0	0.0	1.0	0.0	0.0	1.0	0.0	0.0	0.0	0.0	1.0	0.0	0.0	0.0	1.0	1.0	0.0	0.0	0.0
UPP1	7378	symbol	H. sapiens	7378	H. sapiens	0.0	1.0	0.0	0.0	0.0	0.0	0.0	0.0	0.0	0.0	0.0	0.0	0.0	0.0	0.0	0.0	0.0	0.0	0.0	0.0
UQCR11	10975	symbol	H. sapiens	10975	H. sapiens	0.0	0.0	0.0	0.0	0.0	0.0	0.0	1.0	0.0	0.0	0.0	0.0	0.0	0.0	0.0	0.0	0.0	0.0	0.0	0.0
USE1	55850	symbol	H. sapiens	55850	H. sapiens	0.0	0.0	0.0	0.0	0.0	0.0	0.0	0.0	0.0	0.0	0.0	0.0	0.0	1.0	0.0	0.0	0.0	0.0	0.0	0.0
USF1	7391	symbol	H. sapiens	7391	H. sapiens	0.0	0.0	1.0	0.0	0.0	0.0	0.0	0.0	0.0	0.0	0.0	0.0	0.0	0.0	0.0	0.0	0.0	0.0	1.0	0.0
USP38	84640	symbol	H. sapiens	84640	H. sapiens	0.0	0.0	0.0	0.0	0.0	0.0	0.0	0.0	0.0	0.0	0.0	0.0	0.0	1.0	0.0	0.0	0.0	0.0	0.0	0.0
USP5	8078	symbol	H. sapiens	8078	H. sapiens	0.0	0.0	0.0	0.0	0.0	0.0	0.0	0.0	0.0	1.0	0.0	0.0	0.0	1.0	0.0	0.0	0.0	0.0	0.0	0.0
USP6NL	9712	symbol	H. sapiens	9712	H. sapiens	0.0	0.0	0.0	0.0	0.0	0.0	0.0	0.0	0.0	0.0	0.0	0.0	0.0	0.0	0.0	0.0	0.0	0.0	0.0	0.0
UTP18	51096	symbol	H. sapiens	51096	H. sapiens	1.0	0.0	0.0	0.0	1.0	0.0	0.0	0.0	0.0	0.0	0.0	0.0	0.0	0.0	0.0	0.0	0.0	0.0	0.0	0.0
UTP3	57050	symbol	H. sapiens	57050	H. sapiens	1.0	0.0	0.0	1.0	1.0	0.0	0.0	0.0	0.0	0.0	0.0	0.0	0.0	0.0	0.0	0.0	0.0	0.0	0.0	0.0
VAMP7	6845	symbol	H. sapiens	6845	H. sapiens	0.0	0.0	0.0	0.0	0.0	0.0	0.0	0.0	0.0	0.0	0.0	0.0	0.0	0.0	0.0	0.0	0.0	0.0	0.0	0.0
VASP	7408	symbol	H. sapiens	7408	H. sapiens	0.0	0.0	0.0	0.0	0.0	0.0	0.0	0.0	0.0	0.0	0.0	0.0	0.0	0.0	0.0	0.0	0.0	0.0	0.0	0.0
VBP1	7411	symbol	H. sapiens	7411	H. sapiens	1.0	0.0	0.0	0.0	0.0	0.0	0.0	0.0	0.0	0.0	0.0	0.0	0.0	0.0	0.0	0.0	0.0	0.0	0.0	0.0
VCPIP1	80124	symbol	H. sapiens	80124	H. sapiens	0.0	0.0	0.0	0.0	0.0	0.0	0.0	0.0	0.0	0.0	0.0	1.0	0.0	1.0	0.0	0.0	1.0	0.0	0.0	0.0
VMA21	203547	symbol	H. sapiens	203547	H. sapiens	0.0	0.0	0.0	0.0	0.0	0.0	0.0	0.0	0.0	0.0	0.0	0.0	0.0	0.0	0.0	0.0	0.0	0.0	0.0	0.0
VMAC	400673	symbol	H. sapiens	400673	H. sapiens	0.0	0.0	0.0	0.0	0.0	0.0	0.0	0.0	0.0	0.0	0.0	0.0	0.0	0.0	0.0	0.0	0.0	0.0	0.0	0.0
VNN3	55350	gene_synonym	H. sapiens	55350	H. sapiens	0.0	0.0	0.0	0.0	0.0	0.0	0.0	0.0	0.0	0.0	0.0	0.0	0.0	0.0	0.0	0.0	0.0	0.0	0.0	0.0
VPS13B	157680	symbol	H. sapiens	157680	H. sapiens	0.0	0.0	0.0	0.0	0.0	0.0	0.0	0.0	0.0	0.0	0.0	0.0	0.0	0.0	0.0	0.0	0.0	0.0	0.0	0.0
VPS53	55275	symbol	H. sapiens	55275	H. sapiens	0.0	0.0	0.0	0.0	0.0	0.0	0.0	0.0	0.0	0.0	0.0	0.0	0.0	0.0	0.0	0.0	0.0	0.0	0.0	0.0
VTRNA1-1	56664	symbol	H. sapiens	56664	H. sapiens	0.0	0.0	0.0	0.0	0.0	0.0	0.0	0.0	0.0	0.0	0.0	0.0	0.0	0.0	0.0	0.0	0.0	0.0	0.0	0.0
VWA9	81556	gene_synonym	H. sapiens	81556	H. sapiens	0.0	0.0	0.0	0.0	1.0	0.0	0.0	0.0	0.0	0.0	0.0	0.0	0.0	0.0	0.0	0.0	0.0	0.0	0.0	0.0
WASF1	8936	symbol	H. sapiens	8936	H. sapiens	0.0	0.0	0.0	0.0	0.0	0.0	0.0	1.0	0.0	0.0	0.0	0.0	0.0	0.0	0.0	0.0	0.0	0.0	0.0	0.0
WBSCR22	114049	gene_synonym	H. sapiens	114049	H. sapiens	0.0	0.0	0.0	1.0	1.0	0.0	1.0	0.0	0.0	0.0	0.0	0.0	0.0	0.0	0.0	0.0	0.0	0.0	0.0	0.0
WDR27	253769	symbol	H. sapiens	253769	H. sapiens	0.0	0.0	0.0	0.0	0.0	0.0	0.0	0.0	0.0	0.0	0.0	0.0	0.0	0.0	0.0	0.0	0.0	0.0	0.0	0.0
WDR43	23160	symbol	H. sapiens	23160	H. sapiens	0.0	0.0	0.0	0.0	1.0	0.0	0.0	0.0	0.0	0.0	0.0	0.0	0.0	0.0	0.0	0.0	0.0	0.0	0.0	0.0
WDR55	54853	symbol	H. sapiens	54853	H. sapiens	0.0	0.0	0.0	0.0	1.0	0.0	0.0	0.0	0.0	0.0	0.0	0.0	0.0	0.0	0.0	0.0	0.0	0.0	0.0	0.0
WDSUB1	151525	symbol	H. sapiens	151525	H. sapiens	0.0	0.0	0.0	0.0	0.0	0.0	0.0	0.0	0.0	0.0	0.0	0.0	0.0	1.0	0.0	0.0	0.0	0.0	0.0	0.0
WEE1	7465	symbol	H. sapiens	7465	H. sapiens	0.0	0.0	0.0	0.0	0.0	0.0	0.0	0.0	0.0	0.0	0.0	0.0	0.0	0.0	0.0	0.0	1.0	0.0	0.0	0.0
WEE2-AS1	285962	symbol	H. sapiens	285962	H. sapiens	1.0	0.0	0.0	0.0	1.0	0.0	0.0	0.0	0.0	0.0	0.0	0.0	0.0	0.0	0.0	0.0	0.0	0.0	0.0	0.0
WHSC1	7468	gene_synonym	H. sapiens	7468	H. sapiens	0.0	0.0	0.0	1.0	0.0	0.0	1.0	0.0	0.0	0.0	0.0	1.0	0.0	0.0	0.0	1.0	0.0	0.0	0.0	0.0
WIPF1	7456	symbol	H. sapiens	7456	H. sapiens	0.0	0.0	0.0	0.0	0.0	0.0	0.0	0.0	0.0	0.0	0.0	0.0	0.0	0.0	0.0	0.0	0.0	0.0	0.0	0.0
WNK1	65125	symbol	H. sapiens	65125	H. sapiens	0.0	0.0	0.0	0.0	0.0	0.0	0.0	0.0	1.0	0.0	0.0	0.0	0.0	0.0	0.0	0.0	0.0	1.0	0.0	0.0
WRNIP1	56897	symbol	H. sapiens	56897	H. sapiens	0.0	1.0	0.0	0.0	0.0	0.0	0.0	0.0	0.0	0.0	0.0	1.0	0.0	0.0	0.0	1.0	0.0	0.0	0.0	0.0
XAB2	56949	symbol	H. sapiens	56949	H. sapiens	1.0	1.0	0.0	0.0	1.0	0.0	0.0	0.0	0.0	0.0	0.0	1.0	0.0	0.0	0.0	0.0	0.0	0.0	0.0	0.0
XCR1	2829	symbol	H. sapiens	2829	H. sapiens	0.0	0.0	0.0	0.0	0.0	0.0	0.0	0.0	0.0	0.0	0.0	0.0	0.0	0.0	0.0	0.0	0.0	0.0	0.0	0.0
XPNPEP1	7511	symbol	H. sapiens	7511	H. sapiens	0.0	0.0	0.0	0.0	0.0	0.0	0.0	0.0	0.0	0.0	0.0	0.0	0.0	0.0	0.0	0.0	0.0	0.0	1.0	0.0
YDJC	150223	symbol	H. sapiens	150223	H. sapiens	0.0	0.0	0.0	0.0	0.0	0.0	0.0	0.0	0.0	0.0	0.0	0.0	0.0	0.0	0.0	0.0	0.0	0.0	0.0	0.0
YES1	7525	symbol	H. sapiens	7525	H. sapiens	0.0	0.0	0.0	0.0	0.0	0.0	0.0	0.0	0.0	0.0	0.0	0.0	0.0	0.0	0.0	0.0	0.0	1.0	0.0	0.0
YIPF4	84272	symbol	H. sapiens	84272	H. sapiens	0.0	0.0	0.0	0.0	0.0	0.0	0.0	0.0	0.0	0.0	0.0	0.0	0.0	0.0	0.0	0.0	0.0	0.0	0.0	0.0
YIPF6	286451	symbol	H. sapiens	286451	H. sapiens	0.0	0.0	0.0	0.0	0.0	0.0	0.0	0.0	0.0	0.0	0.0	0.0	0.0	0.0	0.0	0.0	0.0	0.0	0.0	0.0
YLPM1	56252	symbol	H. sapiens	56252	H. sapiens	0.0	0.0	0.0	0.0	0.0	1.0	0.0	0.0	0.0	0.0	0.0	0.0	0.0	0.0	0.0	1.0	0.0	0.0	0.0	0.0
YME1L1	10730	symbol	H. sapiens	10730	H. sapiens	0.0	0.0	0.0	0.0	0.0	0.0	0.0	1.0	0.0	0.0	0.0	0.0	0.0	1.0	0.0	0.0	0.0	0.0	0.0	0.0
YPEL2	388403	symbol	H. sapiens	388403	H. sapiens	0.0	0.0	0.0	0.0	0.0	0.0	0.0	0.0	0.0	0.0	0.0	0.0	0.0	0.0	0.0	0.0	0.0	0.0	0.0	0.0
YPEL5	51646	symbol	H. sapiens	51646	H. sapiens	0.0	0.0	0.0	0.0	0.0	0.0	0.0	0.0	0.0	0.0	0.0	0.0	1.0	0.0	0.0	0.0	0.0	0.0	0.0	0.0
YRDC	79693	symbol	H. sapiens	79693	H. sapiens	0.0	0.0	0.0	0.0	0.0	0.0	0.0	0.0	0.0	0.0	0.0	0.0	0.0	0.0	0.0	0.0	0.0	0.0	0.0	0.0
YWHAQP8	392510	symbol	H. sapiens	392510	H. sapiens	0.0	0.0	0.0	0.0	0.0	0.0	0.0	0.0	0.0	0.0	0.0	0.0	0.0	0.0	0.0	0.0	0.0	0.0	0.0	0.0
YY1AP1	55249	symbol	H. sapiens	55249	H. sapiens	0.0	0.0	0.0	0.0	0.0	0.0	0.0	0.0	0.0	0.0	1.0	0.0	0.0	0.0	0.0	0.0	0.0	0.0	0.0	0.0
ZBED5	58486	symbol	H. sapiens	58486	H. sapiens	0.0	0.0	0.0	0.0	0.0	0.0	0.0	0.0	0.0	0.0	0.0	0.0	0.0	0.0	0.0	0.0	0.0	0.0	0.0	0.0
ZBED9	114821	symbol	H. sapiens	114821	H. sapiens	0.0	0.0	0.0	0.0	0.0	0.0	0.0	0.0	0.0	0.0	0.0	1.0	0.0	0.0	0.0	0.0	0.0	0.0	0.0	0.0
ZBTB10	65986	symbol	H. sapiens	65986	H. sapiens	0.0	0.0	0.0	0.0	0.0	0.0	0.0	0.0	0.0	0.0	0.0	0.0	0.0	0.0	0.0	0.0	0.0	0.0	0.0	0.0
ZBTB20	26137	symbol	H. sapiens	26137	H. sapiens	0.0	0.0	0.0	0.0	0.0	0.0	0.0	0.0	0.0	1.0	0.0	0.0	0.0	0.0	0.0	0.0	0.0	0.0	0.0	0.0
ZBTB38	253461	symbol	H. sapiens	253461	H. sapiens	0.0	0.0	0.0	0.0	0.0	0.0	0.0	0.0	0.0	0.0	0.0	1.0	0.0	0.0	0.0	0.0	0.0	0.0	1.0	0.0
ZBTB7A	51341	symbol	H. sapiens	51341	H. sapiens	0.0	1.0	1.0	1.0	0.0	0.0	0.0	0.0	0.0	0.0	0.0	1.0	0.0	0.0	1.0	0.0	0.0	0.0	0.0	0.0
ZC2HC1C	79696	symbol	H. sapiens	79696	H. sapiens	0.0	0.0	0.0	0.0	0.0	0.0	0.0	0.0	0.0	0.0	0.0	0.0	0.0	0.0	0.0	0.0	0.0	0.0	0.0	0.0
ZC3H12A	80149	symbol	H. sapiens	80149	H. sapiens	1.0	0.0	0.0	0.0	0.0	0.0	0.0	0.0	1.0	1.0	0.0	1.0	0.0	0.0	1.0	1.0	0.0	0.0	0.0	0.0
ZC3HAV1	56829	symbol	H. sapiens	56829	H. sapiens	0.0	0.0	0.0	0.0	0.0	0.0	0.0	0.0	0.0	1.0	0.0	0.0	0.0	0.0	1.0	0.0	0.0	0.0	0.0	0.0
ZCCHC14	23174	symbol	H. sapiens	23174	H. sapiens	0.0	0.0	0.0	0.0	0.0	0.0	0.0	0.0	0.0	0.0	0.0	0.0	0.0	0.0	0.0	0.0	0.0	0.0	0.0	0.0
ZCCHC4	29063	symbol	H. sapiens	29063	H. sapiens	0.0	0.0	0.0	0.0	1.0	0.0	1.0	0.0	0.0	0.0	0.0	0.0	0.0	0.0	1.0	0.0	0.0	0.0	0.0	0.0
ZDHHC21	340481	symbol	H. sapiens	340481	H. sapiens	0.0	0.0	0.0	0.0	0.0	0.0	0.0	0.0	0.0	0.0	0.0	0.0	0.0	0.0	0.0	0.0	0.0	0.0	0.0	0.0
ZEB2	9839	symbol	H. sapiens	9839	H. sapiens	0.0	0.0	0.0	0.0	0.0	0.0	0.0	0.0	0.0	0.0	0.0	0.0	0.0	0.0	0.0	0.0	0.0	0.0	0.0	0.0
ZER1	10444	symbol	H. sapiens	10444	H. sapiens	0.0	0.0	0.0	0.0	0.0	0.0	0.0	0.0	0.0	1.0	0.0	0.0	1.0	1.0	0.0	0.0	0.0	0.0	0.0	0.0
ZFAND5	7763	symbol	H. sapiens	7763	H. sapiens	0.0	0.0	0.0	0.0	0.0	0.0	0.0	0.0	0.0	0.0	0.0	0.0	0.0	0.0	0.0	0.0	0.0	0.0	0.0	0.0
ZFC3H1	196441	symbol	H. sapiens	196441	H. sapiens	0.0	0.0	0.0	0.0	0.0	0.0	0.0	0.0	0.0	0.0	0.0	0.0	0.0	0.0	0.0	0.0	0.0	0.0	0.0	0.0
ZFP36	7538	symbol	H. sapiens	7538	H. sapiens	1.0	0.0	0.0	0.0	0.0	0.0	0.0	0.0	1.0	1.0	0.0	0.0	0.0	0.0	1.0	0.0	0.0	0.0	0.0	0.0
ZFYVE19	84936	symbol	H. sapiens	84936	H. sapiens	0.0	0.0	0.0	0.0	0.0	0.0	0.0	0.0	0.0	0.0	0.0	0.0	0.0	0.0	0.0	0.0	1.0	0.0	0.0	0.0
ZFYVE26	23503	symbol	H. sapiens	23503	H. sapiens	0.0	0.0	0.0	0.0	0.0	0.0	0.0	0.0	0.0	0.0	0.0	1.0	0.0	0.0	0.0	0.0	1.0	0.0	0.0	0.0
ZFYVE27	118813	symbol	H. sapiens	118813	H. sapiens	0.0	0.0	0.0	0.0	0.0	0.0	0.0	0.0	0.0	0.0	0.0	0.0	0.0	0.0	0.0	0.0	0.0	0.0	0.0	0.0
ZKSCAN8	7745	symbol	H. sapiens	7745	H. sapiens	0.0	0.0	0.0	0.0	0.0	0.0	0.0	0.0	0.0	0.0	0.0	0.0	0.0	0.0	0.0	0.0	0.0	0.0	0.0	0.0
ZMAT2	153527	symbol	H. sapiens	153527	H. sapiens	1.0	0.0	0.0	0.0	0.0	0.0	0.0	0.0	0.0	0.0	0.0	0.0	0.0	0.0	0.0	0.0	0.0	0.0	0.0	0.0
ZMAT5	55954	symbol	H. sapiens	55954	H. sapiens	1.0	0.0	0.0	0.0	0.0	0.0	0.0	0.0	0.0	0.0	0.0	0.0	0.0	0.0	0.0	0.0	0.0	0.0	0.0	0.0
ZMYM5	9205	symbol	H. sapiens	9205	H. sapiens	0.0	0.0	0.0	0.0	0.0	0.0	0.0	0.0	0.0	0.0	0.0	0.0	0.0	0.0	0.0	0.0	0.0	0.0	0.0	0.0
ZNF107	51427	symbol	H. sapiens	51427	H. sapiens	0.0	0.0	1.0	0.0	0.0	0.0	0.0	0.0	0.0	0.0	0.0	0.0	0.0	0.0	0.0	0.0	0.0	0.0	0.0	0.0
ZNF121	7675	symbol	H. sapiens	7675	H. sapiens	0.0	0.0	0.0	0.0	0.0	0.0	0.0	0.0	0.0	0.0	0.0	0.0	0.0	0.0	0.0	0.0	0.0	0.0	0.0	0.0
ZNF138	7697	symbol	H. sapiens	7697	H. sapiens	0.0	0.0	0.0	0.0	0.0	0.0	0.0	0.0	0.0	0.0	0.0	0.0	0.0	0.0	0.0	0.0	0.0	0.0	0.0	0.0
ZNF142	7701	symbol	H. sapiens	7701	H. sapiens	0.0	0.0	0.0	0.0	0.0	0.0	0.0	0.0	0.0	0.0	0.0	0.0	0.0	0.0	0.0	0.0	0.0	0.0	0.0	0.0
ZNF169	169841	symbol	H. sapiens	169841	H. sapiens	0.0	0.0	0.0	0.0	0.0	0.0	0.0	0.0	0.0	0.0	0.0	0.0	0.0	0.0	0.0	0.0	0.0	0.0	0.0	0.0
ZNF195	7748	symbol	H. sapiens	7748	H. sapiens	0.0	0.0	0.0	0.0	0.0	0.0	0.0	0.0	0.0	0.0	0.0	0.0	0.0	0.0	0.0	0.0	0.0	0.0	0.0	0.0
ZNF226	7769	symbol	H. sapiens	7769	H. sapiens	0.0	0.0	1.0	0.0	0.0	0.0	0.0	0.0	0.0	0.0	0.0	0.0	0.0	0.0	0.0	0.0	0.0	0.0	0.0	0.0
ZNF235	9310	symbol	H. sapiens	9310	H. sapiens	0.0	0.0	0.0	0.0	0.0	0.0	0.0	0.0	0.0	0.0	0.0	0.0	0.0	0.0	0.0	0.0	0.0	0.0	0.0	0.0
ZNF236	7776	symbol	H. sapiens	7776	H. sapiens	0.0	0.0	0.0	0.0	0.0	0.0	0.0	0.0	0.0	0.0	0.0	0.0	0.0	0.0	0.0	0.0	0.0	0.0	0.0	0.0
ZNF248	57209	symbol	H. sapiens	57209	H. sapiens	0.0	0.0	0.0	0.0	0.0	0.0	0.0	0.0	0.0	0.0	0.0	0.0	0.0	0.0	0.0	0.0	0.0	0.0	0.0	0.0
ZNF274	10782	symbol	H. sapiens	10782	H. sapiens	0.0	0.0	0.0	0.0	0.0	0.0	0.0	0.0	0.0	0.0	0.0	0.0	0.0	0.0	0.0	0.0	0.0	0.0	0.0	1.0
ZNF277	11179	symbol	H. sapiens	11179	H. sapiens	0.0	0.0	0.0	0.0	0.0	0.0	0.0	0.0	0.0	0.0	0.0	0.0	0.0	0.0	0.0	1.0	0.0	0.0	0.0	0.0
ZNF280C	55609	symbol	H. sapiens	55609	H. sapiens	0.0	0.0	0.0	0.0	0.0	0.0	0.0	0.0	0.0	0.0	0.0	0.0	0.0	0.0	0.0	0.0	0.0	0.0	0.0	0.0
ZNF292	23036	symbol	H. sapiens	23036	H. sapiens	0.0	0.0	1.0	0.0	0.0	0.0	0.0	0.0	0.0	0.0	0.0	0.0	0.0	0.0	0.0	0.0	0.0	0.0	0.0	0.0
ZNF320	162967	symbol	H. sapiens	162967	H. sapiens	0.0	0.0	0.0	0.0	0.0	0.0	0.0	0.0	0.0	0.0	0.0	0.0	0.0	0.0	0.0	0.0	0.0	0.0	0.0	0.0
ZNF337	26152	symbol	H. sapiens	26152	H. sapiens	0.0	0.0	0.0	0.0	0.0	0.0	0.0	0.0	0.0	0.0	0.0	0.0	0.0	0.0	0.0	0.0	0.0	0.0	0.0	0.0
ZNF345	25850	symbol	H. sapiens	25850	H. sapiens	0.0	1.0	1.0	0.0	0.0	0.0	0.0	0.0	0.0	0.0	0.0	0.0	0.0	0.0	0.0	0.0	0.0	0.0	0.0	0.0
ZNF37BP	100129482	symbol	H. sapiens	100129482	H. sapiens	0.0	0.0	0.0	0.0	0.0	0.0	0.0	0.0	0.0	0.0	0.0	0.0	0.0	0.0	0.0	0.0	0.0	0.0	0.0	0.0
ZNF436	80818	symbol	H. sapiens	80818	H. sapiens	0.0	0.0	0.0	0.0	0.0	0.0	0.0	0.0	0.0	0.0	0.0	0.0	0.0	0.0	0.0	0.0	0.0	0.0	0.0	0.0
ZNF552	79818	symbol	H. sapiens	79818	H. sapiens	0.0	0.0	0.0	0.0	0.0	0.0	0.0	0.0	0.0	0.0	0.0	0.0	0.0	0.0	0.0	0.0	0.0	0.0	0.0	0.0
ZNF57	126295	symbol	H. sapiens	126295	H. sapiens	0.0	0.0	0.0	0.0	0.0	0.0	0.0	0.0	0.0	0.0	0.0	0.0	0.0	0.0	0.0	0.0	0.0	0.0	0.0	0.0
ZNF585A	199704	symbol	H. sapiens	199704	H. sapiens	0.0	0.0	1.0	0.0	0.0	0.0	0.0	0.0	0.0	0.0	0.0	0.0	0.0	0.0	0.0	0.0	0.0	0.0	0.0	0.0
ZNF586	54807	symbol	H. sapiens	54807	H. sapiens	0.0	0.0	0.0	0.0	0.0	0.0	0.0	0.0	0.0	0.0	0.0	0.0	0.0	0.0	0.0	0.0	0.0	0.0	0.0	0.0
ZNF605	100289635	symbol	H. sapiens	100289635	H. sapiens	0.0	0.0	0.0	0.0	0.0	0.0	0.0	0.0	0.0	0.0	0.0	0.0	0.0	0.0	0.0	0.0	0.0	0.0	0.0	0.0
ZNF622	90441	symbol	H. sapiens	90441	H. sapiens	1.0	0.0	0.0	0.0	1.0	0.0	0.0	0.0	0.0	0.0	0.0	0.0	0.0	0.0	0.0	1.0	0.0	1.0	0.0	0.0
ZNF630	57232	symbol	H. sapiens	57232	H. sapiens	0.0	0.0	0.0	0.0	0.0	0.0	0.0	0.0	0.0	0.0	0.0	0.0	0.0	0.0	0.0	0.0	0.0	0.0	0.0	0.0
ZNF684	127396	symbol	H. sapiens	127396	H. sapiens	0.0	0.0	0.0	0.0	0.0	0.0	0.0	0.0	0.0	0.0	0.0	0.0	0.0	0.0	0.0	0.0	0.0	0.0	0.0	0.0
ZNF70	7621	symbol	H. sapiens	7621	H. sapiens	0.0	0.0	0.0	0.0	0.0	0.0	0.0	0.0	0.0	0.0	0.0	0.0	0.0	0.0	0.0	0.0	0.0	0.0	0.0	0.0
ZNF767P	79970	symbol	H. sapiens	79970	H. sapiens	0.0	0.0	0.0	0.0	0.0	0.0	0.0	0.0	0.0	0.0	0.0	0.0	0.0	0.0	0.0	0.0	0.0	0.0	0.0	0.0
ZNF774	342132	symbol	H. sapiens	342132	H. sapiens	0.0	0.0	0.0	0.0	0.0	0.0	0.0	0.0	0.0	0.0	0.0	0.0	0.0	0.0	0.0	0.0	0.0	0.0	0.0	0.0
ZNF782	158431	symbol	H. sapiens	158431	H. sapiens	0.0	0.0	1.0	0.0	0.0	0.0	0.0	0.0	0.0	0.0	0.0	0.0	0.0	0.0	0.0	0.0	0.0	0.0	0.0	0.0
ZNF829	374899	symbol	H. sapiens	374899	H. sapiens	0.0	0.0	0.0	0.0	0.0	0.0	0.0	0.0	0.0	0.0	0.0	0.0	0.0	0.0	0.0	0.0	0.0	0.0	0.0	0.0
ZNF830	91603	symbol	H. sapiens	91603	H. sapiens	1.0	0.0	0.0	0.0	0.0	1.0	0.0	0.0	0.0	0.0	0.0	1.0	0.0	0.0	0.0	0.0	1.0	0.0	0.0	0.0
ZNRD1ASP	80862	symbol	H. sapiens	80862	H. sapiens	0.0	0.0	0.0	0.0	0.0	0.0	0.0	0.0	0.0	0.0	0.0	0.0	0.0	0.0	0.0	0.0	0.0	0.0	0.0	0.0
ZSCAN26	7741	symbol	H. sapiens	7741	H. sapiens	0.0	0.0	0.0	0.0	0.0	0.0	0.0	0.0	0.0	0.0	0.0	0.0	0.0	0.0	0.0	0.0	0.0	0.0	0.0	0.0
ZXDC	79364	symbol	H. sapiens	79364	H. sapiens	0.0	0.0	0.0	0.0	0.0	0.0	0.0	0.0	0.0	0.0	1.0	0.0	0.0	0.0	0.0	0.0	0.0	0.0	0.0	0.0
ZZEF1	23140	symbol	H. sapiens	23140	H. sapiens	0.0	0.0	0.0	0.0	0.0	0.0	0.0	0.0	0.0	0.0	1.0	0.0	0.0	0.0	0.0	0.0	0.0	0.0	0.0	0.0

## Sheet: Enrichment
GroupID	Category	Term	Description	LogP	Log(q-value)	InTerm_InList	Genes	Symbols
1_Summary	GO Cellular Components	GO:1990904	ribonucleoprotein complex	-18.8728	-14.5268	90/733	1653,1660,2091,3069,3192,3396,5935,6122,6138,6175,6187,6311,6626,6726,6730,7011,7411,7538,7884,8087,8220,8568,8662,8664,8666,8668,9092,9416,9887,9939,10199,10432,10492,10569,10607,11338,22849,22938,22984,23293,23468,23524,24148,25949,26121,26156,27327,27339,28987,29896,51073,51081,51096,51116,51253,51340,51386,51388,54948,55011,55052,55234,55272,55651,55702,55954,56949,57050,58155,60488,64949,649…	DDX1,DHX9,FBL,HDLBP,HNRNPU,MRPL58,RBM3,RPL3,RPL15,RPLP0,RPS2,ATXN2,SNRPA,SRP9,SRP68,TEP1,VBP1,ZFP36,SLBP,FXR1,ESS2,RRP1,EIF3B,EIF3D,EIF3G,EIF3I,SART1,DDX23,SMG7,RBM8A,MPHOSPH10,RBM14,SYNCRIP,SLU7,TBL3,U2AF2,CPEB3,SNW1,PDCD11,SMG6,CBX5,SRRM2,PRPF6,SYF2,PRPF31,RSL1D1,TNRC6A,PRPF19,NOB1,TRA2A,MRPL4,MRPS7,UTP18,MRPS2,MRPL37,CRNKL1,EIF3L,NIP7,MRPL16,PIH1D1,MRPL20,SMU1,IMP3,NHP2,YJU2,ZMAT5,XAB2,UTP3,PT…
1_Member	GO Cellular Components	GO:1990904	ribonucleoprotein complex	-18.8728	-14.5268	90/733	1653,1660,2091,3069,3192,3396,5935,6122,6138,6175,6187,6311,6626,6726,6730,7011,7411,7538,7884,8087,8220,8568,8662,8664,8666,8668,9092,9416,9887,9939,10199,10432,10492,10569,10607,11338,22849,22938,22984,23293,23468,23524,24148,25949,26121,26156,27327,27339,28987,29896,51073,51081,51096,51116,51253,51340,51386,51388,54948,55011,55052,55234,55272,55651,55702,55954,56949,57050,58155,60488,64949,649…	DDX1,DHX9,FBL,HDLBP,HNRNPU,MRPL58,RBM3,RPL3,RPL15,RPLP0,RPS2,ATXN2,SNRPA,SRP9,SRP68,TEP1,VBP1,ZFP36,SLBP,FXR1,ESS2,RRP1,EIF3B,EIF3D,EIF3G,EIF3I,SART1,DDX23,SMG7,RBM8A,MPHOSPH10,RBM14,SYNCRIP,SLU7,TBL3,U2AF2,CPEB3,SNW1,PDCD11,SMG6,CBX5,SRRM2,PRPF6,SYF2,PRPF31,RSL1D1,TNRC6A,PRPF19,NOB1,TRA2A,MRPL4,MRPS7,UTP18,MRPS2,MRPL37,CRNKL1,EIF3L,NIP7,MRPL16,PIH1D1,MRPL20,SMU1,IMP3,NHP2,YJU2,ZMAT5,XAB2,UTP3,PT…
1_Member	GO Biological Processes	GO:0016071	mRNA metabolic process	-16.5148	-12.4699	76/606	468,472,1478,1479,1653,1660,1797,2034,2107,3192,5566,6433,6626,6879,7538,7884,8220,9092,9130,9238,9337,9416,9887,9939,10114,10147,10419,10432,10492,10569,10768,10891,10898,10949,10978,11218,11338,22828,22889,22938,22984,23049,23293,23524,24148,25949,26121,27257,27339,29896,51319,51340,54998,55234,55629,55702,55795,55954,56915,56949,58155,59286,64062,79228,79753,80149,83759,91603,115024,131870,151…	ATF4,ATM,CSTF2,CSTF3,DDX1,DHX9,DXO,EPAS1,ETF1,HNRNPU,PRKACA,SFSWAP,SNRPA,TAF7,ZFP36,SLBP,ESS2,SART1,FAM50A,TBRG4,CNOT8,DDX23,SMG7,RBM8A,HIPK3,SUGP2,PRMT5,RBM14,SYNCRIP,SLU7,AHCYL1,PPARGC1A,CPSF4,HNRNPA0,CLP1,DDX20,U2AF2,SCAF8,KHDC4,SNW1,PDCD11,SMG1,SMG6,SRRM2,PRPF6,SYF2,PRPF31,LSM1,PRPF19,TRA2A,RSRC1,CRNKL1,AURKAIP1,SMU1,PNRC2,YJU2,PCID2,ZMAT5,EXOSC5,XAB2,PTBP2,UBL5,RBM26,THOC6,SNIP1,ZC3H12A,RBM4…
1_Member	GO Biological Processes	GO:0006397	mRNA processing	-12.3843	-9.03838	57/458	1478,1479,1653,1660,3192,5566,6433,6626,7884,8220,9092,9130,9238,9416,9939,10147,10419,10432,10492,10569,10768,10891,10898,10949,10978,11218,11338,22828,22889,22938,22984,23524,24148,25949,26121,27257,27339,29896,51319,51340,54998,55234,55702,55954,56949,58155,59286,64062,79228,79753,83759,91603,151987,153527,255967,285962,100151684	CSTF2,CSTF3,DDX1,DHX9,HNRNPU,PRKACA,SFSWAP,SNRPA,SLBP,ESS2,SART1,FAM50A,TBRG4,DDX23,RBM8A,SUGP2,PRMT5,RBM14,SYNCRIP,SLU7,AHCYL1,PPARGC1A,CPSF4,HNRNPA0,CLP1,DDX20,U2AF2,SCAF8,KHDC4,SNW1,PDCD11,SRRM2,PRPF6,SYF2,PRPF31,LSM1,PRPF19,TRA2A,RSRC1,CRNKL1,AURKAIP1,SMU1,YJU2,ZMAT5,XAB2,PTBP2,UBL5,RBM26,THOC6,SNIP1,RBM4B,ZNF830,PPP4R2,ZMAT2,PAN3,WEE2-AS1,RNU6ATAC
1_Member	GO Biological Processes	GO:0008380	RNA splicing	-10.6377	-7.67193	48/383	1653,1660,3192,3276,6433,6626,8148,8220,9092,9130,9416,9939,10147,10199,10419,10432,10492,10569,10891,10978,11218,11338,22889,22938,23524,24148,25949,26121,27257,27339,29896,51319,51340,51493,55234,55702,55954,56949,58155,59286,79228,79753,83759,91603,151987,153527,285962,100151684	DDX1,DHX9,HNRNPU,PRMT1,SFSWAP,SNRPA,TAF15,ESS2,SART1,FAM50A,DDX23,RBM8A,SUGP2,MPHOSPH10,PRMT5,RBM14,SYNCRIP,SLU7,PPARGC1A,CLP1,DDX20,U2AF2,KHDC4,SNW1,SRRM2,PRPF6,SYF2,PRPF31,LSM1,PRPF19,TRA2A,RSRC1,CRNKL1,RTCB,SMU1,YJU2,ZMAT5,XAB2,PTBP2,UBL5,THOC6,SNIP1,RBM4B,ZNF830,PPP4R2,ZMAT2,WEE2-AS1,RNU6ATAC
1_Member	GO Biological Processes	GO:0000375	RNA splicing, via transesterification reactions	-9.53449	-6.69675	37/268	1653,1660,3192,6433,6626,8220,9092,9416,9939,10199,10419,10432,10492,10569,11218,11338,22889,22938,23524,24148,25949,26121,27257,27339,29896,51319,51340,55234,55702,56949,58155,59286,79753,83759,153527,285962,100151684	DDX1,DHX9,HNRNPU,SFSWAP,SNRPA,ESS2,SART1,DDX23,RBM8A,MPHOSPH10,PRMT5,RBM14,SYNCRIP,SLU7,DDX20,U2AF2,KHDC4,SNW1,SRRM2,PRPF6,SYF2,PRPF31,LSM1,PRPF19,TRA2A,RSRC1,CRNKL1,SMU1,YJU2,XAB2,PTBP2,UBL5,SNIP1,RBM4B,ZMAT2,WEE2-AS1,RNU6ATAC
1_Member	GO Biological Processes	GO:0000377	RNA splicing, via transesterification reactions with bulged adenosine as nucleophile	-8.58199	-5.86952	35/264	1653,1660,3192,6433,6626,8220,9092,9416,9939,10419,10432,10492,10569,11218,11338,22889,22938,23524,24148,25949,26121,27339,29896,51319,51340,55234,55702,56949,58155,59286,79753,83759,153527,285962,100151684	DDX1,DHX9,HNRNPU,SFSWAP,SNRPA,ESS2,SART1,DDX23,RBM8A,PRMT5,RBM14,SYNCRIP,SLU7,DDX20,U2AF2,KHDC4,SNW1,SRRM2,PRPF6,SYF2,PRPF31,PRPF19,TRA2A,RSRC1,CRNKL1,SMU1,YJU2,XAB2,PTBP2,UBL5,SNIP1,RBM4B,ZMAT2,WEE2-AS1,RNU6ATAC
1_Member	GO Biological Processes	GO:0000398	mRNA splicing, via spliceosome	-8.58199	-5.86952	35/264	1653,1660,3192,6433,6626,8220,9092,9416,9939,10419,10432,10492,10569,11218,11338,22889,22938,23524,24148,25949,26121,27339,29896,51319,51340,55234,55702,56949,58155,59286,79753,83759,153527,285962,100151684	DDX1,DHX9,HNRNPU,SFSWAP,SNRPA,ESS2,SART1,DDX23,RBM8A,PRMT5,RBM14,SYNCRIP,SLU7,DDX20,U2AF2,KHDC4,SNW1,SRRM2,PRPF6,SYF2,PRPF31,PRPF19,TRA2A,RSRC1,CRNKL1,SMU1,YJU2,XAB2,PTBP2,UBL5,SNIP1,RBM4B,ZMAT2,WEE2-AS1,RNU6ATAC
1_Member	GO Biological Processes	GO:0022618	ribonucleoprotein complex assembly	-7.8135	-5.23841	29/206	1653,1660,1975,6122,6175,6433,7458,9092,9416,10419,10569,10978,11218,22889,24148,26121,27339,29777,29997,51081,51340,55011,55052,55702,56949,58155,192669,285962,100151684	DDX1,DHX9,EIF4B,RPL3,RPLP0,SFSWAP,EIF4H,SART1,DDX23,PRMT5,SLU7,CLP1,DDX20,KHDC4,PRPF6,PRPF31,PRPF19,ABT1,NOP53,MRPS7,CRNKL1,PIH1D1,MRPL20,YJU2,XAB2,PTBP2,AGO3,WEE2-AS1,RNU6ATAC
1_Member	GO Biological Processes	GO:0071826	ribonucleoprotein complex subunit organization	-7.48553	-4.95913	29/213	1653,1660,1975,6122,6175,6433,7458,9092,9416,10419,10569,10978,11218,22889,24148,26121,27339,29777,29997,51081,51340,55011,55052,55702,56949,58155,192669,285962,100151684	DDX1,DHX9,EIF4B,RPL3,RPLP0,SFSWAP,EIF4H,SART1,DDX23,PRMT5,SLU7,CLP1,DDX20,KHDC4,PRPF6,PRPF31,PRPF19,ABT1,NOP53,MRPS7,CRNKL1,PIH1D1,MRPL20,YJU2,XAB2,PTBP2,AGO3,WEE2-AS1,RNU6ATAC
1_Member	GO Cellular Components	GO:0005681	spliceosomal complex	-6.73431	-4.33776	26/192	3192,5935,6626,8220,9092,9416,9939,10492,10569,11338,22938,23524,24148,25949,26121,27339,29896,51340,55234,55702,55954,56949,58155,79753,91603,153527	HNRNPU,RBM3,SNRPA,ESS2,SART1,DDX23,RBM8A,SYNCRIP,SLU7,U2AF2,SNW1,SRRM2,PRPF6,SYF2,PRPF31,PRPF19,TRA2A,CRNKL1,SMU1,YJU2,ZMAT5,XAB2,PTBP2,SNIP1,ZNF830,ZMAT2
1_Member	GO Cellular Components	GO:0005684	U2-type spliceosomal complex	-5.13626	-2.97688	15/92	9092,9939,11338,22938,23524,24148,25949,26121,27339,51340,55234,55702,56949,79753,153527	SART1,RBM8A,U2AF2,SNW1,SRRM2,PRPF6,SYF2,PRPF31,PRPF19,CRNKL1,SMU1,YJU2,XAB2,SNIP1,ZMAT2
1_Member	GO Cellular Components	GO:0071013	catalytic step 2 spliceosome	-4.76786	-2.69101	14/87	3192,8220,9092,9416,9939,10492,10569,22938,23524,24148,25949,27339,51340,56949	HNRNPU,ESS2,SART1,DDX23,RBM8A,SYNCRIP,SLU7,SNW1,SRRM2,PRPF6,SYF2,PRPF19,CRNKL1,XAB2
1_Member	GO Biological Processes	GO:0000245	spliceosomal complex assembly	-3.3074	-1.58203	11/79	1653,6433,9416,10569,22889,24148,27339,51340,58155,285962,100151684	DDX1,SFSWAP,DDX23,SLU7,KHDC4,PRPF6,PRPF19,CRNKL1,PTBP2,WEE2-AS1,RNU6ATAC
2_Summary	GO Biological Processes	GO:0034654	nucleobase-containing compound biosynthetic process	-15.8633	-11.9945	83/718	142,468,513,522,1025,1052,1063,1389,1660,1723,1840,1906,2034,2353,2354,2639,2962,3251,3727,4351,4522,4609,4837,4881,4929,5160,5372,5432,6301,6619,6675,6879,7011,7019,7343,7378,7913,8861,8939,8942,9314,9337,9524,9533,9646,10114,10135,10302,10419,10725,10891,11137,11176,22828,23054,23181,23417,25850,27109,29777,30968,51341,51514,54386,55011,55191,55651,55739,55795,56897,56949,64116,64216,64425,6484…	PARP1,ATF4,ATP5F1D,ATP5PF,CDK9,CEBPD,CENPF,CREBL2,DHX9,DHODH,DTX1,EDN1,EPAS1,FOS,FOSB,GCDH,GTF2F1,HPRT1,JUND,MPI,MTHFD1,MYC,NNMT,NPR1,NR4A2,PDHA1,PMM1,POLR2C,SARS1,SNAPC3,UAP1,TAF7,TEP1,TFAM,UBTF,UPP1,DEK,LDB1,FUBP3,KYNU,KLF4,CNOT8,TECR,POLR1C,CTR9,HIPK3,NAMPT,SNAPC5,PRMT5,NFAT5,PPARGC1A,PWP1,BAZ2A,SCAF8,NCOA6,DIP2A,MLYCD,ZNF345,DMAC2L,ABT1,STOML2,ZBTB7A,DTL,TERF2IP,PIH1D1,NADSYN1,NHP2,NAXD,PCID2…
2_Member	GO Biological Processes	GO:0034654	nucleobase-containing compound biosynthetic process	-15.8633	-11.9945	83/718	142,468,513,522,1025,1052,1063,1389,1660,1723,1840,1906,2034,2353,2354,2639,2962,3251,3727,4351,4522,4609,4837,4881,4929,5160,5372,5432,6301,6619,6675,6879,7011,7019,7343,7378,7913,8861,8939,8942,9314,9337,9524,9533,9646,10114,10135,10302,10419,10725,10891,11137,11176,22828,23054,23181,23417,25850,27109,29777,30968,51341,51514,54386,55011,55191,55651,55739,55795,56897,56949,64116,64216,64425,6484…	PARP1,ATF4,ATP5F1D,ATP5PF,CDK9,CEBPD,CENPF,CREBL2,DHX9,DHODH,DTX1,EDN1,EPAS1,FOS,FOSB,GCDH,GTF2F1,HPRT1,JUND,MPI,MTHFD1,MYC,NNMT,NPR1,NR4A2,PDHA1,PMM1,POLR2C,SARS1,SNAPC3,UAP1,TAF7,TEP1,TFAM,UBTF,UPP1,DEK,LDB1,FUBP3,KYNU,KLF4,CNOT8,TECR,POLR1C,CTR9,HIPK3,NAMPT,SNAPC5,PRMT5,NFAT5,PPARGC1A,PWP1,BAZ2A,SCAF8,NCOA6,DIP2A,MLYCD,ZNF345,DMAC2L,ABT1,STOML2,ZBTB7A,DTL,TERF2IP,PIH1D1,NADSYN1,NHP2,NAXD,PCID2…
2_Member	GO Biological Processes	GO:0018130	heterocycle biosynthetic process	-15.3271	-11.5832	87/790	142,468,513,522,1025,1052,1063,1371,1389,1660,1723,1840,1906,2034,2353,2354,2639,2962,3145,3251,3727,4351,4522,4609,4837,4881,4929,5160,5372,5432,6301,6619,6675,6697,6879,7011,7019,7343,7378,7913,8861,8939,8942,9314,9337,9524,9533,9646,10058,10114,10135,10302,10419,10725,10891,11137,11176,22828,23054,23181,23417,25850,27109,29777,30968,51341,51514,54386,55011,55191,55651,55739,55795,56897,56949,6…	PARP1,ATF4,ATP5F1D,ATP5PF,CDK9,CEBPD,CENPF,CPOX,CREBL2,DHX9,DHODH,DTX1,EDN1,EPAS1,FOS,FOSB,GCDH,GTF2F1,HMBS,HPRT1,JUND,MPI,MTHFD1,MYC,NNMT,NPR1,NR4A2,PDHA1,PMM1,POLR2C,SARS1,SNAPC3,UAP1,SPR,TAF7,TEP1,TFAM,UBTF,UPP1,DEK,LDB1,FUBP3,KYNU,KLF4,CNOT8,TECR,POLR1C,CTR9,ABCB6,HIPK3,NAMPT,SNAPC5,PRMT5,NFAT5,PPARGC1A,PWP1,BAZ2A,SCAF8,NCOA6,DIP2A,MLYCD,ZNF345,DMAC2L,ABT1,STOML2,ZBTB7A,DTL,TERF2IP,PIH1D1,NAD…
2_Member	GO Biological Processes	GO:0019438	aromatic compound biosynthetic process	-15.0333	-11.3864	87/799	142,468,513,522,1025,1052,1063,1371,1389,1660,1723,1840,1906,2034,2353,2354,2639,2962,3145,3251,3727,4351,4522,4609,4837,4881,4929,5160,5372,5432,6301,6619,6675,6697,6879,7011,7019,7343,7378,7913,8861,8939,8942,9314,9337,9524,9533,9646,10058,10114,10135,10302,10419,10725,10891,11137,11176,22828,23054,23181,23417,25850,27109,29777,30968,51341,51514,54386,55011,55191,55651,55739,55795,56897,56949,6…	PARP1,ATF4,ATP5F1D,ATP5PF,CDK9,CEBPD,CENPF,CPOX,CREBL2,DHX9,DHODH,DTX1,EDN1,EPAS1,FOS,FOSB,GCDH,GTF2F1,HMBS,HPRT1,JUND,MPI,MTHFD1,MYC,NNMT,NPR1,NR4A2,PDHA1,PMM1,POLR2C,SARS1,SNAPC3,UAP1,SPR,TAF7,TEP1,TFAM,UBTF,UPP1,DEK,LDB1,FUBP3,KYNU,KLF4,CNOT8,TECR,POLR1C,CTR9,ABCB6,HIPK3,NAMPT,SNAPC5,PRMT5,NFAT5,PPARGC1A,PWP1,BAZ2A,SCAF8,NCOA6,DIP2A,MLYCD,ZNF345,DMAC2L,ABT1,STOML2,ZBTB7A,DTL,TERF2IP,PIH1D1,NAD…
2_Member	GO Biological Processes	GO:0006351	transcription, DNA-templated	-11.5887	-8.3863	50/386	142,468,1025,1052,1389,1660,1840,1906,2034,2353,2354,2962,3727,4609,4929,5432,6619,6879,7019,7343,7913,8861,8939,9314,9337,9533,9646,10114,10302,10419,10725,10891,11137,11176,22828,23054,25850,29777,51341,55011,55795,56949,64116,64216,64425,79664,79736,79871,84265,171568	PARP1,ATF4,CDK9,CEBPD,CREBL2,DHX9,DTX1,EDN1,EPAS1,FOS,FOSB,GTF2F1,JUND,MYC,NR4A2,POLR2C,SNAPC3,TAF7,TFAM,UBTF,DEK,LDB1,FUBP3,KLF4,CNOT8,POLR1C,CTR9,HIPK3,SNAPC5,PRMT5,NFAT5,PPARGC1A,PWP1,BAZ2A,SCAF8,NCOA6,ZNF345,ABT1,ZBTB7A,PIH1D1,PCID2,XAB2,SLC39A8,TFB2M,POLR1E,ICE2,TEFM,RPAP2,POLR3GL,POLR3H
2_Member	GO Biological Processes	GO:0032774	RNA biosynthetic process	-11.5861	-8.3863	51/399	142,468,1025,1052,1389,1660,1840,1906,2034,2353,2354,2962,3727,4609,4929,5432,6301,6619,6879,7019,7343,7913,8861,8939,9314,9337,9533,9646,10114,10302,10419,10725,10891,11137,11176,22828,23054,25850,29777,51341,55011,55795,56949,64116,64216,64425,79664,79736,79871,84265,171568	PARP1,ATF4,CDK9,CEBPD,CREBL2,DHX9,DTX1,EDN1,EPAS1,FOS,FOSB,GTF2F1,JUND,MYC,NR4A2,POLR2C,SARS1,SNAPC3,TAF7,TFAM,UBTF,DEK,LDB1,FUBP3,KLF4,CNOT8,POLR1C,CTR9,HIPK3,SNAPC5,PRMT5,NFAT5,PPARGC1A,PWP1,BAZ2A,SCAF8,NCOA6,ZNF345,ABT1,ZBTB7A,PIH1D1,PCID2,XAB2,SLC39A8,TFB2M,POLR1E,ICE2,TEFM,RPAP2,POLR3GL,POLR3H
2_Member	GO Biological Processes	GO:0097659	nucleic acid-templated transcription	-11.5043	-8.36248	50/388	142,468,1025,1052,1389,1660,1840,1906,2034,2353,2354,2962,3727,4609,4929,5432,6619,6879,7019,7343,7913,8861,8939,9314,9337,9533,9646,10114,10302,10419,10725,10891,11137,11176,22828,23054,25850,29777,51341,55011,55795,56949,64116,64216,64425,79664,79736,79871,84265,171568	PARP1,ATF4,CDK9,CEBPD,CREBL2,DHX9,DTX1,EDN1,EPAS1,FOS,FOSB,GTF2F1,JUND,MYC,NR4A2,POLR2C,SNAPC3,TAF7,TFAM,UBTF,DEK,LDB1,FUBP3,KLF4,CNOT8,POLR1C,CTR9,HIPK3,SNAPC5,PRMT5,NFAT5,PPARGC1A,PWP1,BAZ2A,SCAF8,NCOA6,ZNF345,ABT1,ZBTB7A,PIH1D1,PCID2,XAB2,SLC39A8,TFB2M,POLR1E,ICE2,TEFM,RPAP2,POLR3GL,POLR3H
2_Member	GO Biological Processes	GO:0006366	transcription by RNA polymerase II	-5.37149	-3.16856	26/226	142,468,1025,1052,1840,1906,2034,2353,2354,2962,3727,4609,5432,6619,6879,7913,8861,9646,10302,10725,10891,22828,25850,29777,55795,79664	PARP1,ATF4,CDK9,CEBPD,DTX1,EDN1,EPAS1,FOS,FOSB,GTF2F1,JUND,MYC,POLR2C,SNAPC3,TAF7,DEK,LDB1,CTR9,SNAPC5,NFAT5,PPARGC1A,SCAF8,ZNF345,ABT1,PCID2,ICE2
3_Summary	GO Molecular Functions	GO:0008134	transcription factor binding	-14.8883	-11.3205	72/594	142,468,1025,1051,1063,1460,1660,2033,2034,2091,2099,2114,2353,2354,2962,3068,3164,3192,3725,3726,3727,4087,4261,4609,4664,4665,4683,4780,4929,5814,6722,6879,7005,7019,7178,7376,7391,8289,8861,9113,9219,9314,10221,10514,10524,10725,10766,10891,11016,11176,11218,11315,11335,22938,22984,23054,23468,23493,23710,24148,51341,51684,55588,55646,64324,64375,64425,79885,80279,84148,92140,124512,467,1019,1…	PARP1,ATF4,CDK9,CEBPB,CENPF,CSNK2B,DHX9,EP300,EPAS1,FBL,ESR1,ETS2,FOS,FOSB,GTF2F1,HDGF,NR4A1,HNRNPU,JUN,JUNB,JUND,SMAD2,CIITA,MYC,NAB1,NAB2,NBN,NFE2L2,NR4A2,PURB,SRF,TAF7,TEAD3,TFAM,TPT1,NR1H2,USF1,ARID1A,LDB1,LATS1,MTA2,KLF4,TRIB1,MYBBP1A,KAT5,NFAT5,TOB2,PPARGC1A,ATF7,BAZ2A,DDX20,PARK7,CBX3,SNW1,PDCD11,NCOA6,CBX5,HEY2,GABARAPL1,PRPF6,ZBTB7A,SUFU,MED29,LYAR,NSD1,IKZF4,POLR1E,HDAC11,CDK5RAP3,KAT8,…
3_Member	GO Molecular Functions	GO:0008134	transcription factor binding	-14.8883	-11.3205	72/594	142,468,1025,1051,1063,1460,1660,2033,2034,2091,2099,2114,2353,2354,2962,3068,3164,3192,3725,3726,3727,4087,4261,4609,4664,4665,4683,4780,4929,5814,6722,6879,7005,7019,7178,7376,7391,8289,8861,9113,9219,9314,10221,10514,10524,10725,10766,10891,11016,11176,11218,11315,11335,22938,22984,23054,23468,23493,23710,24148,51341,51684,55588,55646,64324,64375,64425,79885,80279,84148,92140,124512	PARP1,ATF4,CDK9,CEBPB,CENPF,CSNK2B,DHX9,EP300,EPAS1,FBL,ESR1,ETS2,FOS,FOSB,GTF2F1,HDGF,NR4A1,HNRNPU,JUN,JUNB,JUND,SMAD2,CIITA,MYC,NAB1,NAB2,NBN,NFE2L2,NR4A2,PURB,SRF,TAF7,TEAD3,TFAM,TPT1,NR1H2,USF1,ARID1A,LDB1,LATS1,MTA2,KLF4,TRIB1,MYBBP1A,KAT5,NFAT5,TOB2,PPARGC1A,ATF7,BAZ2A,DDX20,PARK7,CBX3,SNW1,PDCD11,NCOA6,CBX5,HEY2,GABARAPL1,PRPF6,ZBTB7A,SUFU,MED29,LYAR,NSD1,IKZF4,POLR1E,HDAC11,CDK5RAP3,KAT8,…
3_Member	GO Molecular Functions	GO:0140297	DNA-binding transcription factor binding	-10.9421	-7.91838	55/469	142,468,1051,1063,1460,1660,2033,2034,2099,2114,2353,3164,3725,3727,4087,4261,4609,4683,4780,4929,5814,6722,6879,7005,7178,7376,7391,8289,8861,9113,9219,9314,10221,10524,10766,10891,11176,11218,11315,22938,22984,23054,23468,23493,23710,24148,51341,55646,64324,64375,79885,80279,84148,92140,124512	PARP1,ATF4,CEBPB,CENPF,CSNK2B,DHX9,EP300,EPAS1,ESR1,ETS2,FOS,NR4A1,JUN,JUND,SMAD2,CIITA,MYC,NBN,NFE2L2,NR4A2,PURB,SRF,TAF7,TEAD3,TPT1,NR1H2,USF1,ARID1A,LDB1,LATS1,MTA2,KLF4,TRIB1,KAT5,TOB2,PPARGC1A,BAZ2A,DDX20,PARK7,SNW1,PDCD11,NCOA6,CBX5,HEY2,GABARAPL1,PRPF6,ZBTB7A,LYAR,NSD1,IKZF4,HDAC11,CDK5RAP3,KAT8,MTDH,METTL23
3_Member	GO Molecular Functions	GO:0061629	RNA polymerase II-specific DNA-binding transcription factor binding	-8.42052	-5.74668	41/347	142,468,1051,1460,1660,2033,2034,2099,2114,2353,3164,3725,3727,4087,4780,4929,6722,6879,7005,7376,8289,8861,9113,9219,9314,10221,10766,10891,11176,11315,22938,22984,23054,23493,23710,24148,51341,64324,80279,84148,92140	PARP1,ATF4,CEBPB,CSNK2B,DHX9,EP300,EPAS1,ESR1,ETS2,FOS,NR4A1,JUN,JUND,SMAD2,NFE2L2,NR4A2,SRF,TAF7,TEAD3,NR1H2,ARID1A,LDB1,LATS1,MTA2,KLF4,TRIB1,TOB2,PPARGC1A,BAZ2A,PARK7,SNW1,PDCD11,NCOA6,HEY2,GABARAPL1,PRPF6,ZBTB7A,NSD1,CDK5RAP3,KAT8,MTDH
3_Member	GO Cellular Components	GO:0005667	transcription regulator complex	-7.29654	-4.80703	48/483	142,467,468,1019,1051,1052,2033,2034,2099,2353,2962,3068,3164,3725,3726,3727,4087,4601,4609,4780,4929,6619,6778,6879,7005,7376,7391,8861,9219,9314,10432,10443,10524,10725,11016,11218,11335,23054,23468,23493,29777,51132,54815,55588,55729,55758,80306,400569	PARP1,ATF3,ATF4,CDK4,CEBPB,CEBPD,EP300,EPAS1,ESR1,FOS,GTF2F1,HDGF,NR4A1,JUN,JUNB,JUND,SMAD2,MXI1,MYC,NFE2L2,NR4A2,SNAPC3,STAT6,TAF7,TEAD3,NR1H2,USF1,LDB1,MTA2,KLF4,RBM14,N4BP2L2,KAT5,NFAT5,ATF7,DDX20,CBX3,NCOA6,CBX5,HEY2,ABT1,RLIM,GATAD2A,MED29,ATF7IP,RCOR3,MED28,MED11
3_Member	GO Molecular Functions	GO:0016922	nuclear receptor binding	-5.74651	-3.47611	20/139	142,1051,2033,2099,3164,3727,4929,6879,7376,8289,9113,10766,10891,11176,11315,22938,23054,24148,51341,64324	PARP1,CEBPB,EP300,ESR1,NR4A1,JUND,NR4A2,TAF7,NR1H2,ARID1A,LATS1,TOB2,PPARGC1A,BAZ2A,PARK7,SNW1,NCOA6,PRPF6,ZBTB7A,NSD1
3_Member	GO Cellular Components	GO:0090575	RNA polymerase II transcription regulator complex	-3.46163	-1.70227	22/230	467,468,1051,1052,2353,2962,3725,3726,3727,4087,4601,4609,4780,6778,6879,7376,8861,11016,11335,55588,80306,400569	ATF3,ATF4,CEBPB,CEBPD,FOS,GTF2F1,JUN,JUNB,JUND,SMAD2,MXI1,MYC,NFE2L2,STAT6,TAF7,NR1H2,LDB1,ATF7,CBX3,MED29,MED28,MED11
3_Member	GO Molecular Functions	GO:0001228	DNA-binding transcription activator activity, RNA polymerase II-specific	-2.84376	-1.26275	34/462	467,468,1051,1052,1958,1960,2034,2099,2353,2354,3164,3663,3664,3725,3726,3727,4087,4603,4609,4780,4929,6722,6778,7376,7769,9095,9314,10725,23036,25850,51427,79800,158431,199704	ATF3,ATF4,CEBPB,CEBPD,EGR1,EGR3,EPAS1,ESR1,FOS,FOSB,NR4A1,IRF5,IRF6,JUN,JUNB,JUND,SMAD2,MYBL1,MYC,NFE2L2,NR4A2,SRF,STAT6,NR1H2,ZNF226,TBX19,KLF4,NFAT5,ZNF292,ZNF345,ZNF107,CARF,ZNF782,ZNF585A
3_Member	GO Molecular Functions	GO:0001216	DNA-binding transcription activator activity	-2.78193	-1.21702	34/466	467,468,1051,1052,1958,1960,2034,2099,2353,2354,3164,3663,3664,3725,3726,3727,4087,4603,4609,4780,4929,6722,6778,7376,7769,9095,9314,10725,23036,25850,51427,79800,158431,199704	ATF3,ATF4,CEBPB,CEBPD,EGR1,EGR3,EPAS1,ESR1,FOS,FOSB,NR4A1,IRF5,IRF6,JUN,JUNB,JUND,SMAD2,MYBL1,MYC,NFE2L2,NR4A2,SRF,STAT6,NR1H2,ZNF226,TBX19,KLF4,NFAT5,ZNF292,ZNF345,ZNF107,CARF,ZNF782,ZNF585A
4_Summary	GO Biological Processes	GO:0006325	chromatin organization	-14.8186	-11.3177	70/569	2033,2099,2186,3170,3192,4297,4524,4609,6418,6419,7468,8019,8289,8342,8815,9077,9130,9219,9760,9810,9869,10336,10362,10419,10524,11176,11335,22955,23347,23468,23492,26240,29028,29844,29994,51132,51317,51341,51460,51548,51720,54790,54815,54891,55011,55209,55904,56950,57050,57798,58508,64324,79697,79885,80205,80853,80854,81611,84148,84333,114049,114803,125476,148479,165918,201161,254048,257218,2840…	EP300,ESR1,BPTF,FOXA2,HNRNPU,KMT2A,MTHFR,MYC,SET,SETMAR,NSD2,BRD3,ARID1A,H2BC14,BANF1,DIRAS3,FAM50A,MTA2,TOX,RNF40,SETDB1,PCGF3,HMG20B,PRMT5,KAT5,BAZ2A,CBX3,SCMH1,SMCHD1,CBX5,CBX7,FAM50B,ATAD2,TFPT,BAZ2B,RLIM,PHF21A,ZBTB7A,SFMBT1,SIRT6,UIMC1,TET2,GATAD2A,INO80D,PIH1D1,SETD5,KMT2E,SMYD2,UTP3,GATAD1,KMT2C,NSD1,RIOX1,HDAC11,CHD9,KDM7A,SETD7,ANP32E,KAT8,PCGF5,BUD23,MYSM1,INO80C,PHF13,RNF168,CENPV,UBN…
4_Member	GO Biological Processes	GO:0006325	chromatin organization	-14.8186	-11.3177	70/569	2033,2099,2186,3170,3192,4297,4524,4609,6418,6419,7468,8019,8289,8342,8815,9077,9130,9219,9760,9810,9869,10336,10362,10419,10524,11176,11335,22955,23347,23468,23492,26240,29028,29844,29994,51132,51317,51341,51460,51548,51720,54790,54815,54891,55011,55209,55904,56950,57050,57798,58508,64324,79697,79885,80205,80853,80854,81611,84148,84333,114049,114803,125476,148479,165918,201161,254048,257218,2840…	EP300,ESR1,BPTF,FOXA2,HNRNPU,KMT2A,MTHFR,MYC,SET,SETMAR,NSD2,BRD3,ARID1A,H2BC14,BANF1,DIRAS3,FAM50A,MTA2,TOX,RNF40,SETDB1,PCGF3,HMG20B,PRMT5,KAT5,BAZ2A,CBX3,SCMH1,SMCHD1,CBX5,CBX7,FAM50B,ATAD2,TFPT,BAZ2B,RLIM,PHF21A,ZBTB7A,SFMBT1,SIRT6,UIMC1,TET2,GATAD2A,INO80D,PIH1D1,SETD5,KMT2E,SMYD2,UTP3,GATAD1,KMT2C,NSD1,RIOX1,HDAC11,CHD9,KDM7A,SETD7,ANP32E,KAT8,PCGF5,BUD23,MYSM1,INO80C,PHF13,RNF168,CENPV,UBN…
5_Summary	GO Biological Processes	GO:0022613	ribonucleoprotein complex biogenesis	-14.6215	-11.1786	60/444	1653,1660,1975,2091,6122,6175,6433,7458,8568,8886,9092,9416,10199,10419,10514,10569,10607,10978,11137,11218,22889,22984,23160,24148,26121,26156,27339,28987,29063,29777,29889,29997,51081,51096,51116,51340,51388,54853,55011,55052,55272,55646,55651,55661,55702,56915,56949,57050,58155,64216,81887,84549,85395,90121,90441,92856,114049,192669,285962,100151684,3035,4087,4603,6301,51493,54482,54522,54920,…	DDX1,DHX9,EIF4B,FBL,RPL3,RPLP0,SFSWAP,EIF4H,RRP1,DDX18,SART1,DDX23,MPHOSPH10,PRMT5,MYBBP1A,SLU7,TBL3,CLP1,PWP1,DDX20,KHDC4,PDCD11,WDR43,PRPF6,PRPF31,RSL1D1,PRPF19,NOB1,ZCCHC4,ABT1,GNL2,NOP53,MRPS7,UTP18,MRPS2,CRNKL1,NIP7,WDR55,PIH1D1,MRPL20,IMP3,LYAR,NHP2,DDX27,YJU2,EXOSC5,XAB2,UTP3,PTBP2,TFB2M,LAS1L,MAK16,SLX9,TSR2,ZNF622,IMP4,BUD23,AGO3,WEE2-AS1,RNU6ATAC,HARS1,SMAD2,MYBL1,SARS1,RTCB,TRMT13,ANKR…
5_Member	GO Biological Processes	GO:0022613	ribonucleoprotein complex biogenesis	-14.6215	-11.1786	60/444	1653,1660,1975,2091,6122,6175,6433,7458,8568,8886,9092,9416,10199,10419,10514,10569,10607,10978,11137,11218,22889,22984,23160,24148,26121,26156,27339,28987,29063,29777,29889,29997,51081,51096,51116,51340,51388,54853,55011,55052,55272,55646,55651,55661,55702,56915,56949,57050,58155,64216,81887,84549,85395,90121,90441,92856,114049,192669,285962,100151684	DDX1,DHX9,EIF4B,FBL,RPL3,RPLP0,SFSWAP,EIF4H,RRP1,DDX18,SART1,DDX23,MPHOSPH10,PRMT5,MYBBP1A,SLU7,TBL3,CLP1,PWP1,DDX20,KHDC4,PDCD11,WDR43,PRPF6,PRPF31,RSL1D1,PRPF19,NOB1,ZCCHC4,ABT1,GNL2,NOP53,MRPS7,UTP18,MRPS2,CRNKL1,NIP7,WDR55,PIH1D1,MRPL20,IMP3,LYAR,NHP2,DDX27,YJU2,EXOSC5,XAB2,UTP3,PTBP2,TFB2M,LAS1L,MAK16,SLX9,TSR2,ZNF622,IMP4,BUD23,AGO3,WEE2-AS1,RNU6ATAC
5_Member	GO Biological Processes	GO:0034660	ncRNA metabolic process	-11.9157	-8.6489	57/470	1653,2091,3035,4087,4603,6301,8568,8886,9092,10199,10607,10978,11137,22984,23160,26156,28987,29063,29777,29997,51096,51493,54482,54522,54853,54920,54973,55011,55174,55272,55621,55623,55646,55651,55661,55699,56915,57050,57604,64216,65080,65123,79691,81556,81887,81890,84549,85395,90121,92856,114034,114049,131870,143689,162989,192669,344405	DDX1,FBL,HARS1,SMAD2,MYBL1,SARS1,RRP1,DDX18,SART1,MPHOSPH10,TBL3,CLP1,PWP1,PDCD11,WDR43,RSL1D1,NOB1,ZCCHC4,ABT1,NOP53,UTP18,RTCB,TRMT13,ANKRD16,WDR55,DUS2,INTS11,PIH1D1,INTS10,IMP3,TRMT1,THUMPD1,LYAR,NHP2,DDX27,IARS2,EXOSC5,UTP3,TRMT9B,TFB2M,MRPL44,INTS3,QTRT2,INTS14,LAS1L,QTRT1,MAK16,SLX9,TSR2,IMP4,TOE1,BUD23,NUDT16,PIWIL4,DEDD2,AGO3,PRORSD1P
5_Member	GO Biological Processes	GO:0034470	ncRNA processing	-11.1305	-8.08556	49/384	1653,2091,4087,6301,8568,8886,9092,10199,10607,10978,11137,22984,23160,26156,28987,29063,29777,29997,51096,51493,54482,54522,54853,54920,54973,55011,55174,55272,55621,55623,55646,55651,55661,56915,57050,57604,64216,65123,79691,81556,81887,81890,84549,85395,90121,92856,114034,114049,192669	DDX1,FBL,SMAD2,SARS1,RRP1,DDX18,SART1,MPHOSPH10,TBL3,CLP1,PWP1,PDCD11,WDR43,RSL1D1,NOB1,ZCCHC4,ABT1,NOP53,UTP18,RTCB,TRMT13,ANKRD16,WDR55,DUS2,INTS11,PIH1D1,INTS10,IMP3,TRMT1,THUMPD1,LYAR,NHP2,DDX27,EXOSC5,UTP3,TRMT9B,TFB2M,INTS3,QTRT2,INTS14,LAS1L,QTRT1,MAK16,SLX9,TSR2,IMP4,TOE1,BUD23,AGO3
5_Member	GO Biological Processes	GO:0042254	ribosome biogenesis	-9.53601	-6.69675	39/293	2091,6122,6175,8568,8886,9092,10199,10514,10607,11137,22984,23160,26156,28987,29063,29777,29889,29997,51081,51096,51116,51388,54853,55011,55052,55272,55646,55651,55661,56915,57050,64216,81887,84549,85395,90121,90441,92856,114049	FBL,RPL3,RPLP0,RRP1,DDX18,SART1,MPHOSPH10,MYBBP1A,TBL3,PWP1,PDCD11,WDR43,RSL1D1,NOB1,ZCCHC4,ABT1,GNL2,NOP53,MRPS7,UTP18,MRPS2,NIP7,WDR55,PIH1D1,MRPL20,IMP3,LYAR,NHP2,DDX27,EXOSC5,UTP3,TFB2M,LAS1L,MAK16,SLX9,TSR2,ZNF622,IMP4,BUD23
5_Member	GO Biological Processes	GO:0016072	rRNA metabolic process	-8.47003	-5.78603	32/229	2091,8568,8886,9092,10199,10607,11137,22984,23160,26156,28987,29063,29777,29997,51096,54853,55011,55272,55646,55651,55661,56915,57050,64216,65080,81887,84549,85395,90121,92856,114049,162989	FBL,RRP1,DDX18,SART1,MPHOSPH10,TBL3,PWP1,PDCD11,WDR43,RSL1D1,NOB1,ZCCHC4,ABT1,NOP53,UTP18,WDR55,PIH1D1,IMP3,LYAR,NHP2,DDX27,EXOSC5,UTP3,TFB2M,MRPL44,LAS1L,MAK16,SLX9,TSR2,IMP4,BUD23,DEDD2
5_Member	GO Biological Processes	GO:0006364	rRNA processing	-7.82807	-5.24556	30/218	2091,8568,8886,9092,10199,10607,11137,22984,23160,26156,28987,29063,29777,29997,51096,54853,55011,55272,55646,55651,55661,56915,57050,64216,81887,84549,85395,90121,92856,114049	FBL,RRP1,DDX18,SART1,MPHOSPH10,TBL3,PWP1,PDCD11,WDR43,RSL1D1,NOB1,ZCCHC4,ABT1,NOP53,UTP18,WDR55,PIH1D1,IMP3,LYAR,NHP2,DDX27,EXOSC5,UTP3,TFB2M,LAS1L,MAK16,SLX9,TSR2,IMP4,BUD23
5_Member	GO Cellular Components	GO:0030684	preribosome	-6.8399	-4.42846	16/78	2091,8568,10199,10607,22984,26156,28987,51096,51388,55272,57050,81887,84549,85395,90441,92856	FBL,RRP1,MPHOSPH10,TBL3,PDCD11,RSL1D1,NOB1,UTP18,NIP7,IMP3,UTP3,LAS1L,MAK16,SLX9,ZNF622,IMP4
5_Member	GO Cellular Components	GO:0034457	Mpp10 complex	-4.11781	-2.1818	3/3	10199,55272,92856	MPHOSPH10,IMP3,IMP4
5_Member	GO Cellular Components	GO:0030686	90S preribosome	-3.77667	-1.92349	7/29	10199,10607,26156,51096,55272,85395,92856	MPHOSPH10,TBL3,RSL1D1,UTP18,IMP3,SLX9,IMP4
5_Member	GO Cellular Components	GO:0032040	small-subunit processome	-3.70893	-1.87886	8/39	2091,10199,10607,22984,51096,55272,57050,92856	FBL,MPHOSPH10,TBL3,PDCD11,UTP18,IMP3,UTP3,IMP4
6_Summary	GO Cellular Components	GO:0016607	nuclear speck	-13.8872	-10.4955	56/410	468,997,1793,2034,2869,3192,3600,4000,4301,4929,5300,5566,9092,9404,9646,9939,10135,10401,10432,10569,11176,11221,11325,11338,22873,22938,23254,23360,23464,23524,24148,25776,25949,25957,26121,27339,51319,51340,54815,55234,55269,55735,55840,55904,56252,56892,64766,79228,79595,83759,91603,114034,149628,163859,204851,339287	ATF4,CDC34,DOCK1,EPAS1,GRK5,HNRNPU,IL15,LMNA,AFDN,NR4A2,PIN1,PRKACA,SART1,LPXN,CTR9,RBM8A,NAMPT,PIAS3,RBM14,SLU7,BAZ2A,DUSP10,DDX42,U2AF2,DZIP1,SNW1,KAZN,FNBP4,GCAT,SRRM2,PRPF6,CBY1,SYF2,PNISR,PRPF31,PRPF19,RSRC1,CRNKL1,GATAD2A,SMU1,PSPC1,DNAJC11,EAF2,KMT2E,YLPM1,TCIM,S100PBP,THOC6,SAP130,RBM4B,ZNF830,TOE1,PYHIN1,SDE2,HIPK1,MSL1
6_Member	GO Cellular Components	GO:0016607	nuclear speck	-13.8872	-10.4955	56/410	468,997,1793,2034,2869,3192,3600,4000,4301,4929,5300,5566,9092,9404,9646,9939,10135,10401,10432,10569,11176,11221,11325,11338,22873,22938,23254,23360,23464,23524,24148,25776,25949,25957,26121,27339,51319,51340,54815,55234,55269,55735,55840,55904,56252,56892,64766,79228,79595,83759,91603,114034,149628,163859,204851,339287	ATF4,CDC34,DOCK1,EPAS1,GRK5,HNRNPU,IL15,LMNA,AFDN,NR4A2,PIN1,PRKACA,SART1,LPXN,CTR9,RBM8A,NAMPT,PIAS3,RBM14,SLU7,BAZ2A,DUSP10,DDX42,U2AF2,DZIP1,SNW1,KAZN,FNBP4,GCAT,SRRM2,PRPF6,CBY1,SYF2,PNISR,PRPF31,PRPF19,RSRC1,CRNKL1,GATAD2A,SMU1,PSPC1,DNAJC11,EAF2,KMT2E,YLPM1,TCIM,S100PBP,THOC6,SAP130,RBM4B,ZNF830,TOE1,PYHIN1,SDE2,HIPK1,MSL1
7_Summary	GO Biological Processes	GO:0016570	histone modification	-12.1831	-8.87857	51/385	472,675,890,1911,2033,2091,3276,4297,5531,6314,6419,6879,7468,8861,9219,9646,9810,9869,10075,10336,10419,10432,10524,11137,11176,11315,23410,28989,51548,51720,54093,54790,54815,55167,55209,55758,56950,58508,64324,79697,79885,80853,80854,84108,84148,84333,114803,151987,165918,284058,339287,2107,2353,4837,8623,25940,29063,51490,54482,55621,55729,55904,57604,64216,84190,84274,114049,121952,124512,14…	ATM,BRCA2,CCNA2,PHC1,EP300,FBL,PRMT1,KMT2A,PPP4C,ATXN7,SETMAR,TAF7,NSD2,LDB1,MTA2,CTR9,RNF40,SETDB1,HUWE1,PCGF3,PRMT5,RBM14,KAT5,PWP1,BAZ2A,PARK7,SIRT3,NTMT1,SIRT6,UIMC1,SETD4,TET2,GATAD2A,MSL2,SETD5,RCOR3,SMYD2,KMT2C,NSD1,RIOX1,HDAC11,KDM7A,SETD7,PCGF6,KAT8,PCGF5,MYSM1,PPP4R2,RNF168,KANSL1,MSL1,ETF1,FOS,NNMT,ASMTL,FAM98A,ZCCHC4,SPOUT1,TRMT13,TRMT1,ATF7IP,KMT2E,TRMT9B,TFB2M,METTL25,COQ5,BUD23,MET…
7_Member	GO Biological Processes	GO:0016570	histone modification	-12.1831	-8.87857	51/385	472,675,890,1911,2033,2091,3276,4297,5531,6314,6419,6879,7468,8861,9219,9646,9810,9869,10075,10336,10419,10432,10524,11137,11176,11315,23410,28989,51548,51720,54093,54790,54815,55167,55209,55758,56950,58508,64324,79697,79885,80853,80854,84108,84148,84333,114803,151987,165918,284058,339287	ATM,BRCA2,CCNA2,PHC1,EP300,FBL,PRMT1,KMT2A,PPP4C,ATXN7,SETMAR,TAF7,NSD2,LDB1,MTA2,CTR9,RNF40,SETDB1,HUWE1,PCGF3,PRMT5,RBM14,KAT5,PWP1,BAZ2A,PARK7,SIRT3,NTMT1,SIRT6,UIMC1,SETD4,TET2,GATAD2A,MSL2,SETD5,RCOR3,SMYD2,KMT2C,NSD1,RIOX1,HDAC11,KDM7A,SETD7,PCGF6,KAT8,PCGF5,MYSM1,PPP4R2,RNF168,KANSL1,MSL1
7_Member	GO Biological Processes	GO:0032259	methylation	-9.52417	-6.69675	40/306	2091,2107,2353,3276,4297,4837,6419,7468,8623,9219,9646,9869,10419,11137,11176,25940,28989,29063,51490,54093,54482,54790,54815,55209,55621,55729,55904,56950,57604,58508,64216,64324,80854,84190,84274,114049,121952,124512,143689,154743	FBL,ETF1,FOS,PRMT1,KMT2A,NNMT,SETMAR,NSD2,ASMTL,MTA2,CTR9,SETDB1,PRMT5,PWP1,BAZ2A,FAM98A,NTMT1,ZCCHC4,SPOUT1,SETD4,TRMT13,TET2,GATAD2A,SETD5,TRMT1,ATF7IP,KMT2E,SMYD2,TRMT9B,KMT2C,TFB2M,NSD1,SETD7,METTL25,COQ5,BUD23,METTL21EP,METTL23,PIWIL4,BMT2
7_Member	GO Biological Processes	GO:0043414	macromolecule methylation	-7.74268	-5.18207	33/258	2091,2107,2353,3276,4297,6419,7468,9219,9646,9869,10419,11137,11176,25940,28989,29063,54093,54482,54790,54815,55209,55621,55729,55904,56950,57604,58508,64216,64324,80854,114049,121952,143689	FBL,ETF1,FOS,PRMT1,KMT2A,SETMAR,NSD2,MTA2,CTR9,SETDB1,PRMT5,PWP1,BAZ2A,FAM98A,NTMT1,ZCCHC4,SETD4,TRMT13,TET2,GATAD2A,SETD5,TRMT1,ATF7IP,KMT2E,SMYD2,TRMT9B,KMT2C,TFB2M,NSD1,SETD7,BUD23,METTL21EP,PIWIL4
7_Member	GO Molecular Functions	GO:0008168	methyltransferase activity	-7.43998	-4.92654	29/214	2091,3276,4297,4837,6419,7468,8623,9869,10419,25940,28989,29063,51490,54093,54482,55209,55621,56950,57604,58508,64216,64324,80854,84190,84274,114049,121952,124512,154743	FBL,PRMT1,KMT2A,NNMT,SETMAR,NSD2,ASMTL,SETDB1,PRMT5,FAM98A,NTMT1,ZCCHC4,SPOUT1,SETD4,TRMT13,SETD5,TRMT1,SMYD2,TRMT9B,KMT2C,TFB2M,NSD1,SETD7,METTL25,COQ5,BUD23,METTL21EP,METTL23,BMT2
7_Member	GO Molecular Functions	GO:0042054	histone methyltransferase activity	-7.09932	-4.63987	14/57	2091,3276,4297,6419,7468,9869,10419,28989,54093,55209,56950,58508,64324,80854	FBL,PRMT1,KMT2A,SETMAR,NSD2,SETDB1,PRMT5,NTMT1,SETD4,SETD5,SMYD2,KMT2C,NSD1,SETD7
7_Member	GO Molecular Functions	GO:0008170	N-methyltransferase activity	-6.98055	-4.54309	18/96	2091,3276,4297,4837,6419,7468,9869,10419,29063,54093,55209,55621,56950,58508,64216,64324,80854,121952	FBL,PRMT1,KMT2A,NNMT,SETMAR,NSD2,SETDB1,PRMT5,ZCCHC4,SETD4,SETD5,TRMT1,SMYD2,KMT2C,TFB2M,NSD1,SETD7,METTL21EP
7_Member	GO Molecular Functions	GO:0016741	transferase activity, transferring one-carbon groups	-6.95908	-4.52695	29/225	2091,3276,4297,4837,6419,7468,8623,9869,10419,25940,28989,29063,51490,54093,54482,55209,55621,56950,57604,58508,64216,64324,80854,84190,84274,114049,121952,124512,154743	FBL,PRMT1,KMT2A,NNMT,SETMAR,NSD2,ASMTL,SETDB1,PRMT5,FAM98A,NTMT1,ZCCHC4,SPOUT1,SETD4,TRMT13,SETD5,TRMT1,SMYD2,TRMT9B,KMT2C,TFB2M,NSD1,SETD7,METTL25,COQ5,BUD23,METTL21EP,METTL23,BMT2
7_Member	GO Biological Processes	GO:0016571	histone methylation	-6.19208	-3.85897	17/97	2091,3276,4297,6419,7468,9646,9869,10419,11137,28989,54093,54790,55209,56950,58508,64324,80854	FBL,PRMT1,KMT2A,SETMAR,NSD2,CTR9,SETDB1,PRMT5,PWP1,NTMT1,SETD4,TET2,SETD5,SMYD2,KMT2C,NSD1,SETD7
7_Member	GO Biological Processes	GO:0018205	peptidyl-lysine modification	-6.05304	-3.7324	32/290	675,1725,2033,4297,5352,6314,6419,6879,7468,8861,9646,9869,10054,10401,10524,11137,11315,23410,54093,54790,55167,55209,56950,58508,59343,64324,79594,80854,84148,121952,284058,339287	BRCA2,DHPS,EP300,KMT2A,PLOD2,ATXN7,SETMAR,TAF7,NSD2,LDB1,CTR9,SETDB1,UBA2,PIAS3,KAT5,PWP1,PARK7,SIRT3,SETD4,TET2,MSL2,SETD5,SMYD2,KMT2C,SENP2,NSD1,MUL1,SETD7,KAT8,METTL21EP,KANSL1,MSL1
7_Member	GO Molecular Functions	GO:0008276	protein methyltransferase activity	-6.01922	-3.7107	16/89	2091,3276,4297,6419,7468,9869,10419,25940,28989,54093,55209,56950,58508,64324,80854,121952	FBL,PRMT1,KMT2A,SETMAR,NSD2,SETDB1,PRMT5,FAM98A,NTMT1,SETD4,SETD5,SMYD2,KMT2C,NSD1,SETD7,METTL21EP
7_Member	GO Biological Processes	GO:0006479	protein methylation	-5.79652	-3.51503	20/138	2091,2107,3276,4297,6419,7468,9646,9869,10419,11137,25940,28989,54093,54790,55209,56950,58508,64324,80854,121952	FBL,ETF1,PRMT1,KMT2A,SETMAR,NSD2,CTR9,SETDB1,PRMT5,PWP1,FAM98A,NTMT1,SETD4,TET2,SETD5,SMYD2,KMT2C,NSD1,SETD7,METTL21EP
7_Member	GO Biological Processes	GO:0008213	protein alkylation	-5.79652	-3.51503	20/138	2091,2107,3276,4297,6419,7468,9646,9869,10419,11137,25940,28989,54093,54790,55209,56950,58508,64324,80854,121952	FBL,ETF1,PRMT1,KMT2A,SETMAR,NSD2,CTR9,SETDB1,PRMT5,PWP1,FAM98A,NTMT1,SETD4,TET2,SETD5,SMYD2,KMT2C,NSD1,SETD7,METTL21EP
7_Member	GO Molecular Functions	GO:0018024	histone-lysine N-methyltransferase activity	-5.10948	-2.95944	10/42	4297,6419,7468,9869,54093,55209,56950,58508,64324,80854	KMT2A,SETMAR,NSD2,SETDB1,SETD4,SETD5,SMYD2,KMT2C,NSD1,SETD7
7_Member	GO Molecular Functions	GO:0008757	S-adenosylmethionine-dependent methyltransferase activity	-5.01189	-2.87547	20/155	2091,3276,4297,4837,6419,7468,9869,10419,29063,54093,55209,55621,56950,58508,64216,64324,80854,84274,114049,121952	FBL,PRMT1,KMT2A,NNMT,SETMAR,NSD2,SETDB1,PRMT5,ZCCHC4,SETD4,SETD5,TRMT1,SMYD2,KMT2C,TFB2M,NSD1,SETD7,COQ5,BUD23,METTL21EP
7_Member	GO Biological Processes	GO:0034968	histone lysine methylation	-4.96009	-2.83687	13/73	4297,6419,7468,9646,9869,11137,54093,54790,55209,56950,58508,64324,80854	KMT2A,SETMAR,NSD2,CTR9,SETDB1,PWP1,SETD4,TET2,SETD5,SMYD2,KMT2C,NSD1,SETD7
7_Member	GO Biological Processes	GO:0018022	peptidyl-lysine methylation	-4.65252	-2.60565	14/89	4297,6419,7468,9646,9869,11137,54093,54790,55209,56950,58508,64324,80854,121952	KMT2A,SETMAR,NSD2,CTR9,SETDB1,PWP1,SETD4,TET2,SETD5,SMYD2,KMT2C,NSD1,SETD7,METTL21EP
7_Member	GO Molecular Functions	GO:0016279	protein-lysine N-methyltransferase activity	-4.55348	-2.51717	11/58	4297,6419,7468,9869,54093,55209,56950,58508,64324,80854,121952	KMT2A,SETMAR,NSD2,SETDB1,SETD4,SETD5,SMYD2,KMT2C,NSD1,SETD7,METTL21EP
7_Member	GO Molecular Functions	GO:0016278	lysine N-methyltransferase activity	-4.48072	-2.45906	11/59	4297,6419,7468,9869,54093,55209,56950,58508,64324,80854,121952	KMT2A,SETMAR,NSD2,SETDB1,SETD4,SETD5,SMYD2,KMT2C,NSD1,SETD7,METTL21EP
7_Member	GO Biological Processes	GO:0010452	histone H3-K36 methylation	-4.29321	-2.31462	5/11	6419,7468,55209,56950,64324	SETMAR,NSD2,SETD5,SMYD2,NSD1
7_Member	GO Molecular Functions	GO:0046975	histone methyltransferase activity (H3-K36 specific)	-4.29321	-2.31462	5/11	6419,7468,55209,56950,64324	SETMAR,NSD2,SETD5,SMYD2,NSD1
7_Member	GO Biological Processes	GO:0034770	histone H4-K20 methylation	-3.07676	-1.42542	4/11	7468,11137,54093,64324	NSD2,PWP1,SETD4,NSD1
7_Member	GO Biological Processes	GO:0018023	peptidyl-lysine trimethylation	-2.81082	-1.2376	7/41	4297,9646,11137,54093,54790,55209,121952	KMT2A,CTR9,PWP1,SETD4,TET2,SETD5,METTL21EP
7_Member	GO Biological Processes	GO:0018027	peptidyl-lysine dimethylation	-2.70664	-1.17266	5/22	4297,6419,54093,56950,80854	KMT2A,SETMAR,SETD4,SMYD2,SETD7
7_Member	GO Molecular Functions	GO:0042799	histone methyltransferase activity (H4-K20 specific)	-2.62961	-1.12315	3/7	7468,54093,64324	NSD2,SETD4,NSD1
7_Member	GO Molecular Functions	GO:0042800	histone methyltransferase activity (H3-K4 specific)	-2.30713	-0.899069	4/17	4297,6419,54093,58508	KMT2A,SETMAR,SETD4,KMT2C
7_Member	GO Biological Processes	GO:0097692	histone H3-K4 monomethylation	-2.27715	-0.882543	3/9	4297,54093,58508	KMT2A,SETD4,KMT2C
7_Member	GO Biological Processes	GO:0051568	histone H3-K4 methylation	-2.13834	-0.785766	6/41	4297,6419,9646,54093,54790,58508	KMT2A,SETMAR,CTR9,SETD4,TET2,KMT2C
7_Member	GO Biological Processes	GO:0018026	peptidyl-lysine monomethylation	-2.01156	-0.707015	3/11	54093,56950,80854	SETD4,SMYD2,SETD7
8_Summary	GO Cellular Components	GO:0005740	mitochondrial envelope	-11.5272	-8.36248	78/783	291,513,522,598,1329,1347,1351,1371,1537,1593,1723,2550,2631,2671,3052,3396,4129,4170,4719,6834,8936,9429,10058,10131,10229,10651,10730,10845,10953,10975,11315,23203,23464,23645,23786,23787,25996,26521,27109,28958,30968,50640,51073,51081,51116,51253,51566,54948,54998,55052,55735,56616,56910,56997,57017,58472,60488,64112,64949,64976,64978,65080,65993,79594,79691,80219,80342,81034,81890,84274,84681…	SLC25A4,ATP5F1D,ATP5PF,BCL2L1,COX5B,COX7A2,COX8A,CPOX,CYC1,CYP27A1,DHODH,GABBR1,NIPSNAP2,GFER,HCCS,MRPL58,MAOB,MCL1,NDUFS1,SURF1,WASF1,ABCG2,ABCB6,TRAP1,COQ7,MTX2,YME1L1,CLPX,TOMM34,UQCR11,PARK7,PMPCA,GCAT,PPP1R15A,BCL2L13,MTCH1,REXO2,TIMM8B,DMAC2L,COA3,STOML2,PNPLA8,MRPL4,MRPS7,MRPS2,MRPL37,ARMCX3,MRPL16,AURKAIP1,MRPL20,DNAJC11,DIABLO,STARD7,COQ8A,COQ9,SQOR,MRPS35,MOAP1,MRPS26,MRPL40,MRPL38,MRPL…
8_Member	GO Cellular Components	GO:0005740	mitochondrial envelope	-11.5272	-8.36248	78/783	291,513,522,598,1329,1347,1351,1371,1537,1593,1723,2550,2631,2671,3052,3396,4129,4170,4719,6834,8936,9429,10058,10131,10229,10651,10730,10845,10953,10975,11315,23203,23464,23645,23786,23787,25996,26521,27109,28958,30968,50640,51073,51081,51116,51253,51566,54948,54998,55052,55735,56616,56910,56997,57017,58472,60488,64112,64949,64976,64978,65080,65993,79594,79691,80219,80342,81034,81890,84274,84681…	SLC25A4,ATP5F1D,ATP5PF,BCL2L1,COX5B,COX7A2,COX8A,CPOX,CYC1,CYP27A1,DHODH,GABBR1,NIPSNAP2,GFER,HCCS,MRPL58,MAOB,MCL1,NDUFS1,SURF1,WASF1,ABCG2,ABCB6,TRAP1,COQ7,MTX2,YME1L1,CLPX,TOMM34,UQCR11,PARK7,PMPCA,GCAT,PPP1R15A,BCL2L13,MTCH1,REXO2,TIMM8B,DMAC2L,COA3,STOML2,PNPLA8,MRPL4,MRPS7,MRPS2,MRPL37,ARMCX3,MRPL16,AURKAIP1,MRPL20,DNAJC11,DIABLO,STARD7,COQ8A,COQ9,SQOR,MRPS35,MOAP1,MRPS26,MRPL40,MRPL38,MRPL…
8_Member	GO Cellular Components	GO:0005759	mitochondrial matrix	-11.2952	-8.17969	56/473	35,36,513,598,1593,1743,1763,2109,2271,2639,3029,3155,3396,3712,4594,4719,5091,5160,7019,8192,9238,10131,10845,10965,11238,11315,23410,23417,23474,25824,25828,25996,27349,51073,51081,51116,51253,54948,55052,55699,55739,60488,64087,64216,64949,64976,64978,65080,65993,79736,80308,84274,112817,116447,123876,166785	ACADS,ACADSB,ATP5F1D,BCL2L1,CYP27A1,DLST,DNA2,ETFB,FH,GCDH,HAGH,HMGCL,MRPL58,IVD,MMUT,NDUFS1,PC,PDHA1,TFAM,CLPP,TBRG4,TRAP1,CLPX,ACOT2,CA5B,PARK7,SIRT3,MLYCD,ETHE1,PRDX5,TXN2,REXO2,MCAT,MRPL4,MRPS7,MRPS2,MRPL37,MRPL16,MRPL20,IARS2,NAXD,MRPS35,MCCC2,TFB2M,MRPS26,MRPL40,MRPL38,MRPL44,MRPS34,TEFM,FLAD1,COQ5,HOGA1,TOP1MT,ACSM2A,MMAA
8_Member	GO Cellular Components	GO:0031966	mitochondrial membrane	-10.7894	-7.78583	73/734	291,513,522,598,1329,1347,1351,1371,1537,1593,1723,2550,2631,3052,3396,4129,4170,4719,6834,8936,9429,10058,10131,10229,10651,10730,10845,10953,10975,23203,23464,23645,23786,23787,26521,27109,28958,30968,50640,51073,51081,51116,51253,51566,54948,54998,55052,55735,56910,56997,57017,58472,60488,64112,64949,64976,64978,65080,65993,79594,79691,80219,80342,81034,81890,84274,84681,84987,91942,114789,116…	SLC25A4,ATP5F1D,ATP5PF,BCL2L1,COX5B,COX7A2,COX8A,CPOX,CYC1,CYP27A1,DHODH,GABBR1,NIPSNAP2,HCCS,MRPL58,MAOB,MCL1,NDUFS1,SURF1,WASF1,ABCG2,ABCB6,TRAP1,COQ7,MTX2,YME1L1,CLPX,TOMM34,UQCR11,PMPCA,GCAT,PPP1R15A,BCL2L13,MTCH1,TIMM8B,DMAC2L,COA3,STOML2,PNPLA8,MRPL4,MRPS7,MRPS2,MRPL37,ARMCX3,MRPL16,AURKAIP1,MRPL20,DNAJC11,STARD7,COQ8A,COQ9,SQOR,MRPS35,MOAP1,MRPS26,MRPL40,MRPL38,MRPL44,MRPS34,MUL1,QTRT2,COQ…
8_Member	GO Cellular Components	GO:0019866	organelle inner membrane	-9.18801	-6.41027	57/551	291,513,522,598,1329,1347,1351,1371,1537,1593,1723,3052,3396,3930,4719,5025,6834,10131,10229,10651,10730,10845,10975,11335,23203,23464,26521,27109,28958,30968,51073,51081,51116,51253,54948,54998,55052,55735,56255,56997,57017,58472,60488,64949,64976,64978,65080,65993,80219,81034,83862,84274,91942,114789,132001,144404,267020	SLC25A4,ATP5F1D,ATP5PF,BCL2L1,COX5B,COX7A2,COX8A,CPOX,CYC1,CYP27A1,DHODH,HCCS,MRPL58,LBR,NDUFS1,P2RX4,SURF1,TRAP1,COQ7,MTX2,YME1L1,CLPX,UQCR11,CBX3,PMPCA,GCAT,TIMM8B,DMAC2L,COA3,STOML2,MRPL4,MRPS7,MRPS2,MRPL37,MRPL16,AURKAIP1,MRPL20,DNAJC11,TMX4,COQ8A,COQ9,SQOR,MRPS35,MRPS26,MRPL40,MRPL38,MRPL44,MRPS34,COQ10B,SLC25A32,TMEM120A,COQ5,NDUFAF2,SLC25A25,TAMM41,TMEM120B,ATP5MGL
8_Member	GO Cellular Components	GO:0005743	mitochondrial inner membrane	-8.34772	-5.68302	51/491	291,513,522,598,1329,1347,1351,1371,1537,1593,1723,3052,3396,4719,6834,10131,10229,10651,10730,10845,10975,23203,23464,26521,27109,28958,30968,51073,51081,51116,51253,54948,54998,55052,55735,56997,57017,58472,60488,64949,64976,64978,65080,65993,80219,81034,84274,91942,114789,132001,267020	SLC25A4,ATP5F1D,ATP5PF,BCL2L1,COX5B,COX7A2,COX8A,CPOX,CYC1,CYP27A1,DHODH,HCCS,MRPL58,NDUFS1,SURF1,TRAP1,COQ7,MTX2,YME1L1,CLPX,UQCR11,PMPCA,GCAT,TIMM8B,DMAC2L,COA3,STOML2,MRPL4,MRPS7,MRPS2,MRPL37,MRPL16,AURKAIP1,MRPL20,DNAJC11,COQ8A,COQ9,SQOR,MRPS35,MRPS26,MRPL40,MRPL38,MRPL44,MRPS34,COQ10B,SLC25A32,COQ5,NDUFAF2,SLC25A25,TAMM41,ATP5MGL
8_Member	GO Cellular Components	GO:0098798	mitochondrial protein-containing complex	-4.97926	-2.8508	29/281	291,513,522,1329,1347,1351,1537,3396,4719,5160,10651,10845,10975,26521,51073,51081,51116,51253,54948,55052,55735,60488,64087,64949,64976,64978,65080,65993,267020	SLC25A4,ATP5F1D,ATP5PF,COX5B,COX7A2,COX8A,CYC1,MRPL58,NDUFS1,PDHA1,MTX2,CLPX,UQCR11,TIMM8B,MRPL4,MRPS7,MRPS2,MRPL37,MRPL16,MRPL20,DNAJC11,MRPS35,MCCC2,MRPS26,MRPL40,MRPL38,MRPL44,MRPS34,ATP5MGL
9_Summary	GO Biological Processes	GO:0042326	negative regulation of phosphorylation	-11.2136	-8.13611	49/382	207,868,1027,1848,2167,3170,3192,3725,4616,4690,5144,5170,5531,5573,5576,5621,5777,6879,8660,9021,9113,9467,10106,10114,10221,10253,10641,11137,11142,11221,11315,11329,26146,51527,51548,54386,54922,55755,57761,64853,79643,80149,80279,80824,81848,84919,151987,203228,406890,2029,4302,6418,9529,10362,10401,11338,23645,54765,55011,59343,64359,84681,123879,142,7538,334,2550,3164,4671,4947,5037,5054,52…	AKT1,CBLB,CDKN1B,DUSP6,FABP4,FOXA2,HNRNPU,JUN,GADD45B,NCK1,PDE4D,PDPK1,PPP4C,PRKAR1A,PRKAR2A,PRNP,PTPN6,TAF7,IRS2,SOCS3,LATS1,SH3BP5,CTDSP2,HIPK3,TRIB1,SPRY2,NPRL2,PWP1,PKIG,DUSP10,PARK7,STK38,TRAF3IP1,GSKIP,SIRT6,TERF2IP,RASIP1,CDK5RAP2,TRIB3,AIDA,CHMP6,ZC3H12A,CDK5RAP3,DUSP16,SPRY4,PPP1R15B,PPP4R2,C9orf72,MIRLET7G,ENSA,MLLT6,SET,BAG5,HMG20B,PIAS3,U2AF2,PPP1R15A,TRIM44,PIH1D1,SENP2,NXN,HINT2,DCU…
9_Member	GO Biological Processes	GO:0042326	negative regulation of phosphorylation	-11.2136	-8.13611	49/382	207,868,1027,1848,2167,3170,3192,3725,4616,4690,5144,5170,5531,5573,5576,5621,5777,6879,8660,9021,9113,9467,10106,10114,10221,10253,10641,11137,11142,11221,11315,11329,26146,51527,51548,54386,54922,55755,57761,64853,79643,80149,80279,80824,81848,84919,151987,203228,406890	AKT1,CBLB,CDKN1B,DUSP6,FABP4,FOXA2,HNRNPU,JUN,GADD45B,NCK1,PDE4D,PDPK1,PPP4C,PRKAR1A,PRKAR2A,PRNP,PTPN6,TAF7,IRS2,SOCS3,LATS1,SH3BP5,CTDSP2,HIPK3,TRIB1,SPRY2,NPRL2,PWP1,PKIG,DUSP10,PARK7,STK38,TRAF3IP1,GSKIP,SIRT6,TERF2IP,RASIP1,CDK5RAP2,TRIB3,AIDA,CHMP6,ZC3H12A,CDK5RAP3,DUSP16,SPRY4,PPP1R15B,PPP4R2,C9orf72,MIRLET7G
9_Member	GO Biological Processes	GO:0031400	negative regulation of protein modification process	-10.6519	-7.67193	58/519	207,868,1027,1848,2029,2167,3725,4302,4616,4690,5144,5170,5531,5573,5576,5621,5777,6418,6879,9021,9113,9467,9529,10106,10114,10221,10253,10362,10401,11137,11142,11221,11315,11329,11338,23645,26146,51527,54386,54765,54922,55011,55755,57761,59343,64359,64853,79643,80149,80279,80824,81848,84681,84919,123879,151987,203228,406890	AKT1,CBLB,CDKN1B,DUSP6,ENSA,FABP4,JUN,MLLT6,GADD45B,NCK1,PDE4D,PDPK1,PPP4C,PRKAR1A,PRKAR2A,PRNP,PTPN6,SET,TAF7,SOCS3,LATS1,SH3BP5,BAG5,CTDSP2,HIPK3,TRIB1,SPRY2,HMG20B,PIAS3,PWP1,PKIG,DUSP10,PARK7,STK38,U2AF2,PPP1R15A,TRAF3IP1,GSKIP,TERF2IP,TRIM44,RASIP1,PIH1D1,CDK5RAP2,TRIB3,SENP2,NXN,AIDA,CHMP6,ZC3H12A,CDK5RAP3,DUSP16,SPRY4,HINT2,PPP1R15B,DCUN1D3,PPP4R2,C9orf72,MIRLET7G
9_Member	GO Biological Processes	GO:0045936	negative regulation of phosphate metabolic process	-10.505	-7.57399	52/440	142,207,868,1027,1848,2029,2167,3170,3192,3725,4616,4690,5144,5170,5531,5573,5576,5621,5777,6879,8660,9021,9113,9467,10106,10114,10221,10253,10641,11137,11142,11221,11315,11329,23645,26146,51527,51548,54386,54922,55755,57761,64853,79643,80149,80279,80824,81848,84919,151987,203228,406890	PARP1,AKT1,CBLB,CDKN1B,DUSP6,ENSA,FABP4,FOXA2,HNRNPU,JUN,GADD45B,NCK1,PDE4D,PDPK1,PPP4C,PRKAR1A,PRKAR2A,PRNP,PTPN6,TAF7,IRS2,SOCS3,LATS1,SH3BP5,CTDSP2,HIPK3,TRIB1,SPRY2,NPRL2,PWP1,PKIG,DUSP10,PARK7,STK38,PPP1R15A,TRAF3IP1,GSKIP,SIRT6,TERF2IP,RASIP1,CDK5RAP2,TRIB3,AIDA,CHMP6,ZC3H12A,CDK5RAP3,DUSP16,SPRY4,PPP1R15B,PPP4R2,C9orf72,MIRLET7G
9_Member	GO Biological Processes	GO:0010563	negative regulation of phosphorus metabolic process	-10.4683	-7.55371	52/441	142,207,868,1027,1848,2029,2167,3170,3192,3725,4616,4690,5144,5170,5531,5573,5576,5621,5777,6879,8660,9021,9113,9467,10106,10114,10221,10253,10641,11137,11142,11221,11315,11329,23645,26146,51527,51548,54386,54922,55755,57761,64853,79643,80149,80279,80824,81848,84919,151987,203228,406890	PARP1,AKT1,CBLB,CDKN1B,DUSP6,ENSA,FABP4,FOXA2,HNRNPU,JUN,GADD45B,NCK1,PDE4D,PDPK1,PPP4C,PRKAR1A,PRKAR2A,PRNP,PTPN6,TAF7,IRS2,SOCS3,LATS1,SH3BP5,CTDSP2,HIPK3,TRIB1,SPRY2,NPRL2,PWP1,PKIG,DUSP10,PARK7,STK38,PPP1R15A,TRAF3IP1,GSKIP,SIRT6,TERF2IP,RASIP1,CDK5RAP2,TRIB3,AIDA,CHMP6,ZC3H12A,CDK5RAP3,DUSP16,SPRY4,PPP1R15B,PPP4R2,C9orf72,MIRLET7G
9_Member	GO Biological Processes	GO:0001933	negative regulation of protein phosphorylation	-10.2218	-7.33827	44/341	207,868,1027,1848,2167,3725,4616,4690,5144,5170,5531,5573,5576,5621,5777,6879,9021,9113,9467,10106,10114,10221,10253,11137,11142,11221,11315,11329,26146,51527,54386,54922,55755,57761,64853,79643,80149,80279,80824,81848,84919,151987,203228,406890	AKT1,CBLB,CDKN1B,DUSP6,FABP4,JUN,GADD45B,NCK1,PDE4D,PDPK1,PPP4C,PRKAR1A,PRKAR2A,PRNP,PTPN6,TAF7,SOCS3,LATS1,SH3BP5,CTDSP2,HIPK3,TRIB1,SPRY2,PWP1,PKIG,DUSP10,PARK7,STK38,TRAF3IP1,GSKIP,TERF2IP,RASIP1,CDK5RAP2,TRIB3,AIDA,CHMP6,ZC3H12A,CDK5RAP3,DUSP16,SPRY4,PPP1R15B,PPP4R2,C9orf72,MIRLET7G
9_Member	GO Biological Processes	GO:0033673	negative regulation of kinase activity	-8.14502	-5.51509	32/236	207,868,1027,2167,3170,3192,4616,5170,5573,5576,5777,6879,8660,9113,9467,10114,10221,10253,10641,11142,11221,11315,11329,51527,54922,55755,57761,64853,79643,80279,80824,81848	AKT1,CBLB,CDKN1B,FABP4,FOXA2,HNRNPU,GADD45B,PDPK1,PRKAR1A,PRKAR2A,PTPN6,TAF7,IRS2,LATS1,SH3BP5,HIPK3,TRIB1,SPRY2,NPRL2,PKIG,DUSP10,PARK7,STK38,GSKIP,RASIP1,CDK5RAP2,TRIB3,AIDA,CHMP6,CDK5RAP3,DUSP16,SPRY4
9_Member	GO Biological Processes	GO:0051348	negative regulation of transferase activity	-7.7848	-5.21701	34/270	207,868,1027,2167,3170,3192,4616,5170,5573,5576,5777,6879,7538,8660,9113,9467,9529,10114,10221,10253,10641,11142,11221,11315,11329,51527,54922,55755,57761,64853,79643,80279,80824,81848	AKT1,CBLB,CDKN1B,FABP4,FOXA2,HNRNPU,GADD45B,PDPK1,PRKAR1A,PRKAR2A,PTPN6,TAF7,ZFP36,IRS2,LATS1,SH3BP5,BAG5,HIPK3,TRIB1,SPRY2,NPRL2,PKIG,DUSP10,PARK7,STK38,GSKIP,RASIP1,CDK5RAP2,TRIB3,AIDA,CHMP6,CDK5RAP3,DUSP16,SPRY4
9_Member	GO Biological Processes	GO:0006469	negative regulation of protein kinase activity	-6.92379	-4.50727	28/213	207,868,1027,2167,4616,5170,5573,5576,5777,6879,9113,9467,10114,10221,10253,11142,11221,11315,11329,51527,54922,55755,57761,64853,79643,80279,80824,81848	AKT1,CBLB,CDKN1B,FABP4,GADD45B,PDPK1,PRKAR1A,PRKAR2A,PTPN6,TAF7,LATS1,SH3BP5,HIPK3,TRIB1,SPRY2,PKIG,DUSP10,PARK7,STK38,GSKIP,RASIP1,CDK5RAP2,TRIB3,AIDA,CHMP6,CDK5RAP3,DUSP16,SPRY4
9_Member	GO Biological Processes	GO:0043086	negative regulation of catalytic activity	-5.6182	-3.37947	62/786	207,334,868,1027,2029,2167,2550,3164,3170,3192,4616,4671,4690,4947,5037,5054,5170,5271,5573,5576,5621,5627,5777,6418,6879,7538,8660,9021,9113,9314,9467,9529,10114,10221,10253,10641,10999,11142,11221,11315,11329,23645,25824,27074,51129,51527,54583,54920,54922,55011,55755,55795,57761,64853,65125,79643,80279,80824,81611,81848,159090,406991	AKT1,APLP2,CBLB,CDKN1B,ENSA,FABP4,GABBR1,NR4A1,FOXA2,HNRNPU,GADD45B,NAIP,NCK1,OAZ2,PEBP1,SERPINE1,PDPK1,SERPINB8,PRKAR1A,PRKAR2A,PRNP,PROS1,PTPN6,SET,TAF7,ZFP36,IRS2,SOCS3,LATS1,KLF4,SH3BP5,BAG5,HIPK3,TRIB1,SPRY2,NPRL2,SLC27A4,PKIG,DUSP10,PARK7,STK38,PPP1R15A,PRDX5,LAMP3,ANGPTL4,GSKIP,EGLN1,DUS2,RASIP1,PIH1D1,CDK5RAP2,PCID2,TRIB3,AIDA,WNK1,CHMP6,CDK5RAP3,DUSP16,ANP32E,SPRY4,PABIR2,MIR21
9_Member	GO Biological Processes	GO:0071901	negative regulation of protein serine/threonine kinase activity	-4.79317	-2.70008	17/122	207,1027,5573,5576,5777,9113,10114,10253,11142,11221,11329,54922,55755,64853,80279,80824,81848	AKT1,CDKN1B,PRKAR1A,PRKAR2A,PTPN6,LATS1,HIPK3,SPRY2,PKIG,DUSP10,STK38,RASIP1,CDK5RAP2,AIDA,CDK5RAP3,DUSP16,SPRY4
9_Member	GO Biological Processes	GO:1902532	negative regulation of intracellular signal transduction	-4.76744	-2.69101	45/543	207,467,472,598,997,1827,1847,1848,1969,2099,4170,4233,4609,4780,5037,5144,5300,5516,5621,5777,5922,7178,9455,9529,10114,10131,10253,10641,11221,11315,11329,29997,54922,55702,64853,79594,80149,80279,80824,81848,83787,154743,220441,406991,407032	AKT1,ATF3,ATM,BCL2L1,CDC34,RCAN1,DUSP5,DUSP6,EPHA2,ESR1,MCL1,MET,MYC,NFE2L2,PEBP1,PDE4D,PIN1,PPP2CB,PRNP,PTPN6,RASA2,TPT1,HOMER2,BAG5,HIPK3,TRAP1,SPRY2,NPRL2,DUSP10,PARK7,STK38,NOP53,RASIP1,YJU2,AIDA,MUL1,ZC3H12A,CDK5RAP3,DUSP16,SPRY4,ARMC10,BMT2,RNF152,MIR21,MIR30C2
9_Member	GO Biological Processes	GO:0071900	regulation of protein serine/threonine kinase activity	-3.86494	-1.99029	32/372	207,890,1027,1906,4216,5573,5576,5777,5899,6654,8312,8844,9077,9113,9146,10114,10221,10253,10979,11142,11221,11329,29950,54922,55011,55755,56892,57761,64853,80279,80824,81848	AKT1,CCNA2,CDKN1B,EDN1,MAP3K4,PRKAR1A,PRKAR2A,PTPN6,RALB,SOS1,AXIN1,KSR1,DIRAS3,LATS1,HGS,HIPK3,TRIB1,SPRY2,FERMT2,PKIG,DUSP10,STK38,SERTAD1,RASIP1,PIH1D1,CDK5RAP2,TCIM,TRIB3,AIDA,CDK5RAP3,DUSP16,SPRY4
9_Member	GO Biological Processes	GO:0043407	negative regulation of MAP kinase activity	-3.04004	-1.3948	9/60	5777,10114,10253,11221,11329,64853,80279,80824,81848	PTPN6,HIPK3,SPRY2,DUSP10,STK38,AIDA,CDK5RAP3,DUSP16,SPRY4
9_Member	GO Biological Processes	GO:0043405	regulation of MAP kinase activity	-2.67362	-1.15115	17/183	1906,4216,5777,6654,8312,8844,9146,10114,10221,10253,11221,11329,57761,64853,80279,80824,81848	EDN1,MAP3K4,PTPN6,SOS1,AXIN1,KSR1,HGS,HIPK3,TRIB1,SPRY2,DUSP10,STK38,TRIB3,AIDA,CDK5RAP3,DUSP16,SPRY4
9_Member	GO Biological Processes	GO:0043409	negative regulation of MAPK cascade	-2.38463	-0.956722	16/179	467,1847,1848,4609,5037,5300,5777,10114,10253,11221,11329,64853,80279,80824,81848,406991	ATF3,DUSP5,DUSP6,MYC,PEBP1,PIN1,PTPN6,HIPK3,SPRY2,DUSP10,STK38,AIDA,CDK5RAP3,DUSP16,SPRY4,MIR21
10_Summary	GO Biological Processes	GO:0009896	positive regulation of catabolic process	-11.2033	-8.13611	58/503	207,291,472,725,868,1027,1263,1797,3479,3949,4478,4609,4780,4947,5702,5899,7538,8078,8312,8517,8660,9337,9810,10075,10221,10241,10273,10444,10524,10641,11315,22849,23130,25976,26137,27257,27327,27352,29763,29997,51429,51514,51548,55070,56829,56915,57690,57761,64112,79589,80149,83547,92140,115024,149628,203228,220441,255967,4953,5300,5566,5774,6469,9113,9146,9529,9860,27074,51582,51684,79643,80279…	AKT1,SLC25A4,ATM,C4BPB,CBLB,CDKN1B,PLK3,DXO,IGF1,LDLR,MSN,MYC,NFE2L2,OAZ2,PSMC3,RALB,ZFP36,USP5,AXIN1,IKBKG,IRS2,CNOT8,RNF40,HUWE1,TRIB1,CALCOCO2,STUB1,ZER1,KAT5,NPRL2,PARK7,CPEB3,ATG2A,TIPARP,ZBTB20,LSM1,TNRC6A,SGSM3,PACSIN3,NOP53,SNX9,DTL,SIRT6,DET1,ZC3HAV1,EXOSC5,TNRC6C,TRIB3,MOAP1,RNF128,ZC3H12A,RILP,MTDH,NT5C3B,PYHIN1,C9orf72,RNF152,PAN3,ODC1,PIN1,PRKACA,PTPN3,SHH,LATS1,HGS,BAG5,LRIG2,LAMP3,…
10_Member	GO Biological Processes	GO:0009896	positive regulation of catabolic process	-11.2033	-8.13611	58/503	207,291,472,725,868,1027,1263,1797,3479,3949,4478,4609,4780,4947,5702,5899,7538,8078,8312,8517,8660,9337,9810,10075,10221,10241,10273,10444,10524,10641,11315,22849,23130,25976,26137,27257,27327,27352,29763,29997,51429,51514,51548,55070,56829,56915,57690,57761,64112,79589,80149,83547,92140,115024,149628,203228,220441,255967	AKT1,SLC25A4,ATM,C4BPB,CBLB,CDKN1B,PLK3,DXO,IGF1,LDLR,MSN,MYC,NFE2L2,OAZ2,PSMC3,RALB,ZFP36,USP5,AXIN1,IKBKG,IRS2,CNOT8,RNF40,HUWE1,TRIB1,CALCOCO2,STUB1,ZER1,KAT5,NPRL2,PARK7,CPEB3,ATG2A,TIPARP,ZBTB20,LSM1,TNRC6A,SGSM3,PACSIN3,NOP53,SNX9,DTL,SIRT6,DET1,ZC3HAV1,EXOSC5,TNRC6C,TRIB3,MOAP1,RNF128,ZC3H12A,RILP,MTDH,NT5C3B,PYHIN1,C9orf72,RNF152,PAN3
10_Member	GO Biological Processes	GO:0031331	positive regulation of cellular catabolic process	-9.08064	-6.32576	49/439	207,291,472,1263,1797,3479,3949,4478,4609,4780,5702,5899,7538,8078,8312,8517,8660,9337,9810,10221,10241,10273,10444,10524,10641,11315,22849,23130,26137,27257,27327,29763,29997,51429,51548,55070,56829,56915,57690,57761,64112,79589,80149,92140,115024,149628,203228,220441,255967	AKT1,SLC25A4,ATM,PLK3,DXO,IGF1,LDLR,MSN,MYC,NFE2L2,PSMC3,RALB,ZFP36,USP5,AXIN1,IKBKG,IRS2,CNOT8,RNF40,TRIB1,CALCOCO2,STUB1,ZER1,KAT5,NPRL2,PARK7,CPEB3,ATG2A,ZBTB20,LSM1,TNRC6A,PACSIN3,NOP53,SNX9,SIRT6,DET1,ZC3HAV1,EXOSC5,TNRC6C,TRIB3,MOAP1,RNF128,ZC3H12A,MTDH,NT5C3B,PYHIN1,C9orf72,RNF152,PAN3
10_Member	GO Biological Processes	GO:0042176	regulation of protein catabolic process	-8.19514	-5.53939	44/395	207,725,868,1027,1263,3949,4478,4780,4947,4953,5300,5566,5702,5774,6469,8078,8312,9113,9146,9529,9810,9860,10075,10221,10273,10444,11315,25976,27074,27352,29763,29997,51429,51514,51548,51582,51684,55070,57761,79589,79643,80279,83547,149628	AKT1,C4BPB,CBLB,CDKN1B,PLK3,LDLR,MSN,NFE2L2,OAZ2,ODC1,PIN1,PRKACA,PSMC3,PTPN3,SHH,USP5,AXIN1,LATS1,HGS,BAG5,RNF40,LRIG2,HUWE1,TRIB1,STUB1,ZER1,PARK7,TIPARP,LAMP3,SGSM3,PACSIN3,NOP53,SNX9,DTL,SIRT6,AZIN1,SUFU,DET1,TRIB3,RNF128,CHMP6,CDK5RAP3,RILP,PYHIN1
10_Member	GO Biological Processes	GO:0045732	positive regulation of protein catabolic process	-6.63109	-4.24419	29/233	207,725,868,1027,1263,3949,4478,4780,4947,5702,8078,8312,9810,10075,10221,10273,10444,25976,27352,29763,29997,51429,51514,51548,55070,57761,79589,83547,149628	AKT1,C4BPB,CBLB,CDKN1B,PLK3,LDLR,MSN,NFE2L2,OAZ2,PSMC3,USP5,AXIN1,RNF40,HUWE1,TRIB1,STUB1,ZER1,TIPARP,SGSM3,PACSIN3,NOP53,SNX9,DTL,SIRT6,DET1,TRIB3,RNF128,RILP,PYHIN1
10_Member	GO Biological Processes	GO:0030162	regulation of proteolysis	-4.57199	-2.5314	56/743	207,334,843,1263,3092,3164,3491,4609,4671,4780,5037,5054,5271,5566,5621,5627,5641,5702,5774,6281,6469,6505,7376,8078,8312,9113,9141,9314,9529,9810,9860,10221,10273,10444,10845,11315,23786,23787,25824,26005,27074,29763,29997,51429,51548,51684,54998,55011,55070,55795,56616,57761,79594,80149,149628,406991	AKT1,APLP2,CASP10,PLK3,HIP1,NR4A1,CCN1,MYC,NAIP,NFE2L2,PEBP1,SERPINE1,SERPINB8,PRKACA,PRNP,PROS1,LGMN,PSMC3,PTPN3,S100A10,SHH,SLC1A1,NR1H2,USP5,AXIN1,LATS1,PDCD5,KLF4,BAG5,RNF40,LRIG2,TRIB1,STUB1,ZER1,CLPX,PARK7,BCL2L13,MTCH1,PRDX5,C2CD3,LAMP3,PACSIN3,NOP53,SNX9,SIRT6,SUFU,AURKAIP1,PIH1D1,DET1,PCID2,DIABLO,TRIB3,MUL1,ZC3H12A,PYHIN1,MIR21
10_Member	GO Biological Processes	GO:1903362	regulation of cellular protein catabolic process	-4.35484	-2.36492	26/258	207,1263,3949,4478,4780,5566,5702,6469,8078,8312,9113,9529,9810,10221,10273,10444,11315,27074,29997,51548,51684,55070,57761,79589,80279,149628	AKT1,PLK3,LDLR,MSN,NFE2L2,PRKACA,PSMC3,SHH,USP5,AXIN1,LATS1,BAG5,RNF40,TRIB1,STUB1,ZER1,PARK7,LAMP3,NOP53,SIRT6,SUFU,DET1,TRIB3,RNF128,CDK5RAP3,PYHIN1
10_Member	GO Biological Processes	GO:0045862	positive regulation of proteolysis	-4.29028	-2.31355	33/369	207,843,1263,3092,3491,4609,4780,5641,5702,6281,6505,8078,8312,9141,9810,10221,10273,10444,10845,23786,23787,29763,29997,51429,51548,54998,55070,56616,57761,79594,80149,149628,406991	AKT1,CASP10,PLK3,HIP1,CCN1,MYC,NFE2L2,LGMN,PSMC3,S100A10,SLC1A1,USP5,AXIN1,PDCD5,RNF40,TRIB1,STUB1,ZER1,CLPX,BCL2L13,MTCH1,PACSIN3,NOP53,SNX9,SIRT6,AURKAIP1,DET1,DIABLO,TRIB3,MUL1,ZC3H12A,PYHIN1,MIR21
10_Member	GO Biological Processes	GO:1903364	positive regulation of cellular protein catabolic process	-3.89533	-2.01178	18/157	207,1263,3949,4478,4780,5702,8078,8312,9810,10221,10273,10444,29997,51548,55070,57761,79589,149628	AKT1,PLK3,LDLR,MSN,NFE2L2,PSMC3,USP5,AXIN1,RNF40,TRIB1,STUB1,ZER1,NOP53,SIRT6,DET1,TRIB3,RNF128,PYHIN1
10_Member	GO Biological Processes	GO:1903050	regulation of proteolysis involved in cellular protein catabolic process	-3.64988	-1.83706	22/223	207,1263,4780,5566,5702,6469,8078,8312,9113,9529,9810,10221,10273,10444,11315,27074,29997,51548,51684,55070,57761,149628	AKT1,PLK3,NFE2L2,PRKACA,PSMC3,SHH,USP5,AXIN1,LATS1,BAG5,RNF40,TRIB1,STUB1,ZER1,PARK7,LAMP3,NOP53,SIRT6,SUFU,DET1,TRIB3,PYHIN1
10_Member	GO Biological Processes	GO:2000058	regulation of ubiquitin-dependent protein catabolic process	-3.59013	-1.7895	18/166	207,1263,4780,6469,8078,8312,9113,9529,10221,10273,10444,11315,29997,51548,51684,55070,57761,149628	AKT1,PLK3,NFE2L2,SHH,USP5,AXIN1,LATS1,BAG5,TRIB1,STUB1,ZER1,PARK7,NOP53,SIRT6,SUFU,DET1,TRIB3,PYHIN1
10_Member	GO Biological Processes	GO:1901800	positive regulation of proteasomal protein catabolic process	-3.38853	-1.64247	14/116	207,1263,4780,5702,8078,8312,9810,10221,10273,10444,29997,51548,55070,57761	AKT1,PLK3,NFE2L2,PSMC3,USP5,AXIN1,RNF40,TRIB1,STUB1,ZER1,NOP53,SIRT6,DET1,TRIB3
10_Member	GO Biological Processes	GO:0061136	regulation of proteasomal protein catabolic process	-3.30757	-1.58203	19/190	207,1263,4780,5566,5702,6469,8078,8312,9529,9810,10221,10273,10444,11315,27074,29997,51548,55070,57761	AKT1,PLK3,NFE2L2,PRKACA,PSMC3,SHH,USP5,AXIN1,BAG5,RNF40,TRIB1,STUB1,ZER1,PARK7,LAMP3,NOP53,SIRT6,DET1,TRIB3
10_Member	GO Biological Processes	GO:0032436	positive regulation of proteasomal ubiquitin-dependent protein catabolic process	-3.29108	-1.57251	12/92	207,1263,4780,8078,8312,10221,10273,10444,29997,51548,55070,57761	AKT1,PLK3,NFE2L2,USP5,AXIN1,TRIB1,STUB1,ZER1,NOP53,SIRT6,DET1,TRIB3
10_Member	GO Biological Processes	GO:1903052	positive regulation of proteolysis involved in cellular protein catabolic process	-3.23534	-1.53265	15/134	207,1263,4780,5702,8078,8312,9810,10221,10273,10444,29997,51548,55070,57761,149628	AKT1,PLK3,NFE2L2,PSMC3,USP5,AXIN1,RNF40,TRIB1,STUB1,ZER1,NOP53,SIRT6,DET1,TRIB3,PYHIN1
10_Member	GO Biological Processes	GO:2000060	positive regulation of ubiquitin-dependent protein catabolic process	-3.17664	-1.4868	13/108	207,1263,4780,8078,8312,10221,10273,10444,29997,51548,55070,57761,149628	AKT1,PLK3,NFE2L2,USP5,AXIN1,TRIB1,STUB1,ZER1,NOP53,SIRT6,DET1,TRIB3,PYHIN1
10_Member	GO Biological Processes	GO:0032434	regulation of proteasomal ubiquitin-dependent protein catabolic process	-3.13419	-1.46553	15/137	207,1263,4780,6469,8078,8312,9529,10221,10273,10444,11315,29997,51548,55070,57761	AKT1,PLK3,NFE2L2,SHH,USP5,AXIN1,BAG5,TRIB1,STUB1,ZER1,PARK7,NOP53,SIRT6,DET1,TRIB3
11_Summary	GO Molecular Functions	GO:0003712	transcription coregulator activity	-10.5133	-7.57399	56/495	1653,1660,1822,1840,2033,3068,3192,3281,4261,4664,4665,7332,8148,8289,8861,9219,9404,10401,10419,10432,10443,10514,10524,10766,10891,11030,11315,22938,23054,23140,23741,24148,29777,51132,51460,51548,51684,55249,55588,55729,55749,55758,57761,58508,64207,64216,64324,79364,80853,84148,89870,92140,114803,163732,359948,400569	DDX1,DHX9,ATN1,DTX1,EP300,HDGF,HNRNPU,HSBP1,CIITA,NAB1,NAB2,UBE2L3,TAF15,ARID1A,LDB1,MTA2,LPXN,PIAS3,PRMT5,RBM14,N4BP2L2,MYBBP1A,KAT5,TOB2,PPARGC1A,RBPMS,PARK7,SNW1,NCOA6,ZZEF1,EID1,PRPF6,ABT1,RLIM,SFMBT1,SIRT6,SUFU,YY1AP1,MED29,ATF7IP,CCAR1,RCOR3,TRIB3,KMT2C,IRF2BPL,TFB2M,NSD1,ZXDC,KDM7A,KAT8,TRIM15,MTDH,MYSM1,CITED4,IRF2BP2,MED11
11_Member	GO Molecular Functions	GO:0003712	transcription coregulator activity	-10.5133	-7.57399	56/495	1653,1660,1822,1840,2033,3068,3192,3281,4261,4664,4665,7332,8148,8289,8861,9219,9404,10401,10419,10432,10443,10514,10524,10766,10891,11030,11315,22938,23054,23140,23741,24148,29777,51132,51460,51548,51684,55249,55588,55729,55749,55758,57761,58508,64207,64216,64324,79364,80853,84148,89870,92140,114803,163732,359948,400569	DDX1,DHX9,ATN1,DTX1,EP300,HDGF,HNRNPU,HSBP1,CIITA,NAB1,NAB2,UBE2L3,TAF15,ARID1A,LDB1,MTA2,LPXN,PIAS3,PRMT5,RBM14,N4BP2L2,MYBBP1A,KAT5,TOB2,PPARGC1A,RBPMS,PARK7,SNW1,NCOA6,ZZEF1,EID1,PRPF6,ABT1,RLIM,SFMBT1,SIRT6,SUFU,YY1AP1,MED29,ATF7IP,CCAR1,RCOR3,TRIB3,KMT2C,IRF2BPL,TFB2M,NSD1,ZXDC,KDM7A,KAT8,TRIM15,MTDH,MYSM1,CITED4,IRF2BP2,MED11
11_Member	GO Molecular Functions	GO:0003714	transcription corepressor activity	-5.23138	-3.03773	23/189	1822,3068,3192,3281,4665,9219,10419,10443,10514,10766,22938,23741,51132,51460,51548,51684,55729,55749,55758,57761,64207,64324,359948	ATN1,HDGF,HNRNPU,HSBP1,NAB2,MTA2,PRMT5,N4BP2L2,MYBBP1A,TOB2,SNW1,EID1,RLIM,SFMBT1,SIRT6,SUFU,ATF7IP,CCAR1,RCOR3,TRIB3,IRF2BPL,NSD1,IRF2BP2
11_Member	GO Molecular Functions	GO:0003713	transcription coactivator activity	-3.7302	-1.8948	25/266	1660,1840,2033,4261,7332,8289,9219,10432,10524,10891,11030,11315,22938,23054,23140,24148,29777,55749,58508,79364,84148,89870,92140,114803,163732	DHX9,DTX1,EP300,CIITA,UBE2L3,ARID1A,MTA2,RBM14,KAT5,PPARGC1A,RBPMS,PARK7,SNW1,NCOA6,ZZEF1,PRPF6,ABT1,CCAR1,KMT2C,ZXDC,KAT8,TRIM15,MTDH,MYSM1,CITED4
12_Summary	GO Biological Processes	GO:0006974	cellular response to DNA damage stimulus	-10.2269	-7.33827	70/709	142,472,545,598,675,1025,1027,1263,1653,1763,1969,2033,2271,4170,4609,4683,5985,6419,7468,8517,10075,10273,10524,11315,11335,22897,22938,23049,23054,23347,23468,23503,23645,25949,27339,29089,29844,29997,51341,51368,51514,51548,51720,54386,54891,55602,56160,56897,56941,56949,57600,64112,65123,80124,80149,80279,80854,84464,84893,91603,93953,125476,163859,165918,200933,204851,253461,257218,100133315…	PARP1,ATM,ATR,BCL2L1,BRCA2,CDK9,CDKN1B,PLK3,DDX1,DNA2,EPHA2,EP300,FH,MCL1,MYC,NBN,RFC5,SETMAR,NSD2,IKBKG,HUWE1,STUB1,KAT5,PARK7,CBX3,CEP164,SNW1,SMG1,NCOA6,SMCHD1,CBX5,ZFYVE26,PPP1R15A,SYF2,PRPF19,UBE2T,TFPT,NOP53,ZBTB7A,TEX264,DTL,SIRT6,UIMC1,TERF2IP,INO80D,CDKN2AIP,NSMCE3,WRNIP1,HMCES,XAB2,FNIP2,MOAP1,INTS3,VCPIP1,ZC3H12A,CDK5RAP3,SETD7,SLX4,FBH1,ZNF830,GCNA,INO80C,SDE2,RNF168,FBXO45,HIPK1,ZBTB…
12_Member	GO Biological Processes	GO:0006974	cellular response to DNA damage stimulus	-10.2269	-7.33827	70/709	142,472,545,598,675,1025,1027,1263,1653,1763,1969,2033,2271,4170,4609,4683,5985,6419,7468,8517,10075,10273,10524,11315,11335,22897,22938,23049,23054,23347,23468,23503,23645,25949,27339,29089,29844,29997,51341,51368,51514,51548,51720,54386,54891,55602,56160,56897,56941,56949,57600,64112,65123,80124,80149,80279,80854,84464,84893,91603,93953,125476,163859,165918,200933,204851,253461,257218,100133315…	PARP1,ATM,ATR,BCL2L1,BRCA2,CDK9,CDKN1B,PLK3,DDX1,DNA2,EPHA2,EP300,FH,MCL1,MYC,NBN,RFC5,SETMAR,NSD2,IKBKG,HUWE1,STUB1,KAT5,PARK7,CBX3,CEP164,SNW1,SMG1,NCOA6,SMCHD1,CBX5,ZFYVE26,PPP1R15A,SYF2,PRPF19,UBE2T,TFPT,NOP53,ZBTB7A,TEX264,DTL,SIRT6,UIMC1,TERF2IP,INO80D,CDKN2AIP,NSMCE3,WRNIP1,HMCES,XAB2,FNIP2,MOAP1,INTS3,VCPIP1,ZC3H12A,CDK5RAP3,SETD7,SLX4,FBH1,ZNF830,GCNA,INO80C,SDE2,RNF168,FBXO45,HIPK1,ZBTB…
12_Member	GO Biological Processes	GO:0006259	DNA metabolic process	-9.16789	-6.40173	67/703	142,472,545,675,997,1025,1063,1653,1763,2271,2353,4683,5985,6419,7011,7247,7468,7555,8815,9219,9416,10075,10273,10524,11176,11315,22897,23049,23347,23503,25996,27339,29089,29844,29997,51341,51368,51514,51548,51720,54386,54790,54815,54891,55651,55729,55904,56160,56897,56915,56941,56949,65123,80124,84464,84893,91603,93953,114821,116138,116447,125476,143689,165918,200316,257218,100133315	PARP1,ATM,ATR,BRCA2,CDC34,CDK9,CENPF,DDX1,DNA2,FH,FOS,NBN,RFC5,SETMAR,TEP1,TSN,NSD2,CNBP,BANF1,MTA2,DDX23,HUWE1,STUB1,KAT5,BAZ2A,PARK7,CEP164,SMG1,SMCHD1,ZFYVE26,REXO2,PRPF19,UBE2T,TFPT,NOP53,ZBTB7A,TEX264,DTL,SIRT6,UIMC1,TERF2IP,TET2,GATAD2A,INO80D,NHP2,ATF7IP,KMT2E,NSMCE3,WRNIP1,EXOSC5,HMCES,XAB2,INTS3,VCPIP1,SLX4,FBH1,ZNF830,GCNA,ZBED9,KLHDC3,TOP1MT,INO80C,PIWIL4,RNF168,APOBEC3F,SHPRH,XNDC1N
12_Member	GO Biological Processes	GO:0006281	DNA repair	-5.67087	-3.41483	43/469	142,472,545,675,1025,1653,1763,2271,4683,5985,6419,7468,10075,10273,10524,11315,22897,23049,23347,23503,27339,29089,29844,29997,51341,51368,51514,51548,51720,54891,56160,56897,56941,56949,65123,80124,84464,84893,93953,125476,165918,257218,100133315	PARP1,ATM,ATR,BRCA2,CDK9,DDX1,DNA2,FH,NBN,RFC5,SETMAR,NSD2,HUWE1,STUB1,KAT5,PARK7,CEP164,SMG1,SMCHD1,ZFYVE26,PRPF19,UBE2T,TFPT,NOP53,ZBTB7A,TEX264,DTL,SIRT6,UIMC1,INO80D,NSMCE3,WRNIP1,HMCES,XAB2,INTS3,VCPIP1,SLX4,FBH1,GCNA,INO80C,RNF168,SHPRH,XNDC1N
12_Member	GO Biological Processes	GO:0006302	double-strand break repair	-3.22355	-1.52597	19/193	142,472,675,1653,1763,4683,6419,7468,10524,23347,23503,27339,51341,51720,56941,65123,84464,84893,165918	PARP1,ATM,BRCA2,DDX1,DNA2,NBN,SETMAR,NSD2,KAT5,SMCHD1,ZFYVE26,PRPF19,ZBTB7A,UIMC1,HMCES,INTS3,SLX4,FBH1,RNF168
12_Member	GO Cellular Components	GO:0090734	site of DNA damage	-3.08183	-1.42785	12/97	142,4000,4683,6419,10092,11335,23347,23468,27339,51341,65123,165918	PARP1,LMNA,NBN,SETMAR,ARPC5,CBX3,SMCHD1,CBX5,PRPF19,ZBTB7A,INTS3,RNF168
12_Member	GO Cellular Components	GO:0035861	site of double-strand break	-3.00067	-1.37157	10/73	142,4000,4683,6419,10092,23347,27339,51341,65123,165918	PARP1,LMNA,NBN,SETMAR,ARPC5,SMCHD1,PRPF19,ZBTB7A,INTS3,RNF168
13_Summary	GO Cellular Components	GO:1990234	transferase complex	-9.72321	-6.85439	74/790	675,890,1019,1025,1027,1743,1911,2033,2962,3276,4297,5287,5432,5573,5576,6879,7332,7993,8517,8835,9021,9533,9646,9810,9821,10273,10336,10419,10444,10513,10524,10956,11275,23014,23054,23468,23492,25847,26121,27338,27430,51439,51514,51646,54442,54876,54994,55070,55167,56160,58508,60673,64425,79691,79871,80012,81887,81890,84108,84148,84265,84333,84893,115290,116138,123879,125476,165918,171568,200933…	BRCA2,CCNA2,CDK4,CDK9,CDKN1B,DLST,PHC1,EP300,GTF2F1,PRMT1,KMT2A,PIK3C2B,POLR2C,PRKAR1A,PRKAR2A,TAF7,UBE2L3,UBXN8,IKBKG,SOCS2,SOCS3,POLR1C,CTR9,RNF40,RB1CC1,STUB1,PCGF3,PRMT5,ZER1,APPBP2,KAT5,OS9,KLHL2,FBXO21,NCOA6,CBX5,CBX7,ANAPC13,PRPF31,UBE2S,MAT2B,FAM8A1,DTL,YPEL5,KCTD5,DCAF16,GID8,DET1,MSL2,NSMCE3,KMT2C,ATG101,POLR1E,QTRT2,RPAP2,PHC3,LAS1L,QTRT1,PCGF6,KAT8,POLR3GL,PCGF5,FBH1,FBXO17,KLHDC3,DCU…
13_Member	GO Cellular Components	GO:1990234	transferase complex	-9.72321	-6.85439	74/790	675,890,1019,1025,1027,1743,1911,2033,2962,3276,4297,5287,5432,5573,5576,6879,7332,7993,8517,8835,9021,9533,9646,9810,9821,10273,10336,10419,10444,10513,10524,10956,11275,23014,23054,23468,23492,25847,26121,27338,27430,51439,51514,51646,54442,54876,54994,55070,55167,56160,58508,60673,64425,79691,79871,80012,81887,81890,84108,84148,84265,84333,84893,115290,116138,123879,125476,165918,171568,200933…	BRCA2,CCNA2,CDK4,CDK9,CDKN1B,DLST,PHC1,EP300,GTF2F1,PRMT1,KMT2A,PIK3C2B,POLR2C,PRKAR1A,PRKAR2A,TAF7,UBE2L3,UBXN8,IKBKG,SOCS2,SOCS3,POLR1C,CTR9,RNF40,RB1CC1,STUB1,PCGF3,PRMT5,ZER1,APPBP2,KAT5,OS9,KLHL2,FBXO21,NCOA6,CBX5,CBX7,ANAPC13,PRPF31,UBE2S,MAT2B,FAM8A1,DTL,YPEL5,KCTD5,DCAF16,GID8,DET1,MSL2,NSMCE3,KMT2C,ATG101,POLR1E,QTRT2,RPAP2,PHC3,LAS1L,QTRT1,PCGF6,KAT8,POLR3GL,PCGF5,FBH1,FBXO17,KLHDC3,DCU…
13_Member	GO Cellular Components	GO:0140535	intracellular protein-containing complex	-9.38617	-6.5843	70/741	675,1027,1460,1653,1793,1911,2033,2962,5432,5516,5531,5532,5566,5573,5576,5693,5702,6879,7332,7993,8517,9337,9533,9646,9810,10273,10336,10444,10513,10524,10956,11275,22849,23014,23049,23492,25847,25940,27095,27338,27430,51439,51493,51514,51646,54442,54876,54994,55070,55167,64425,79871,80012,84108,84148,84265,84333,84893,115290,116138,123879,151987,165918,171568,200933,203228,284058,339287,400569,…	BRCA2,CDKN1B,CSNK2B,DDX1,DOCK1,PHC1,EP300,GTF2F1,POLR2C,PPP2CB,PPP4C,PPP3CB,PRKACA,PRKAR1A,PRKAR2A,PSMB5,PSMC3,TAF7,UBE2L3,UBXN8,IKBKG,CNOT8,POLR1C,CTR9,RNF40,STUB1,PCGF3,ZER1,APPBP2,KAT5,OS9,KLHL2,CPEB3,FBXO21,SMG1,CBX7,ANAPC13,FAM98A,TRAPPC3,UBE2S,MAT2B,FAM8A1,RTCB,DTL,YPEL5,KCTD5,DCAF16,GID8,DET1,MSL2,POLR1E,RPAP2,PHC3,PCGF6,KAT8,POLR3GL,PCGF5,FBH1,FBXO17,KLHDC3,DCUN1D3,PPP4R2,RNF168,POLR3H,FB…
13_Member	GO Cellular Components	GO:0000151	ubiquitin ligase complex	-7.29564	-4.80703	35/296	675,1027,1911,7332,7993,8517,9810,10273,10336,10444,10513,10956,11275,23014,23492,25847,27338,51439,51514,51646,54442,54876,54994,55070,80012,84108,84333,84893,115290,116138,123879,165918,200933,400569,554251	BRCA2,CDKN1B,PHC1,UBE2L3,UBXN8,IKBKG,RNF40,STUB1,PCGF3,ZER1,APPBP2,OS9,KLHL2,FBXO21,CBX7,ANAPC13,UBE2S,FAM8A1,DTL,YPEL5,KCTD5,DCAF16,GID8,DET1,PHC3,PCGF6,PCGF5,FBH1,FBXO17,KLHDC3,DCUN1D3,RNF168,FBXO45,MED11,FBXO48
13_Member	GO Cellular Components	GO:0031461	cullin-RING ubiquitin ligase complex	-2.15037	-0.789859	15/173	1027,10444,10513,11275,25847,27338,51514,54442,54876,55070,84893,115290,116138,200933,554251	CDKN1B,ZER1,APPBP2,KLHL2,ANAPC13,UBE2S,DTL,KCTD5,DCAF16,DET1,FBH1,FBXO17,KLHDC3,FBXO45,FBXO48
14_Summary	GO Biological Processes	GO:0032446	protein modification by small protein conjugation	-9.50095	-6.68649	69/721	207,868,997,1840,1911,4780,7332,7726,8078,8312,8658,8835,9021,9646,9810,10054,10075,10273,10336,10401,10422,10513,10956,11275,23014,23321,25847,27338,27339,29089,50862,51132,51283,51514,54765,54876,54894,55070,55148,55167,55658,55905,57674,64207,79589,79594,80124,80233,80279,80311,84108,84333,84893,89870,92714,115290,116138,123879,147040,151525,152006,163859,165918,200933,220441,257218,283450,378…	AKT1,CBLB,CDC34,DTX1,PHC1,NFE2L2,UBE2L3,TRIM26,USP5,AXIN1,TNKS,SOCS2,SOCS3,CTR9,RNF40,UBA2,HUWE1,STUB1,PCGF3,PIAS3,UBAC1,APPBP2,OS9,KLHL2,FBXO21,TRIM2,ANAPC13,UBE2S,PRPF19,UBE2T,RNF141,RLIM,BFAR,DTL,TRIM44,DCAF16,RNF43,DET1,UBR7,MSL2,RNF126,RNF114,RNF213,IRF2BPL,RNF128,MUL1,VCPIP1,FAAP100,CDK5RAP3,KLHL15,PCGF6,PCGF5,FBH1,TRIM15,ARRDC1,FBXO17,KLHDC3,DCUN1D3,KCTD11,WDSUB1,RNF38,SDE2,RNF168,FBXO45,R…
14_Member	GO Biological Processes	GO:0032446	protein modification by small protein conjugation	-9.50095	-6.68649	69/721	207,868,997,1840,1911,4780,7332,7726,8078,8312,8658,8835,9021,9646,9810,10054,10075,10273,10336,10401,10422,10513,10956,11275,23014,23321,25847,27338,27339,29089,50862,51132,51283,51514,54765,54876,54894,55070,55148,55167,55658,55905,57674,64207,79589,79594,80124,80233,80279,80311,84108,84333,84893,89870,92714,115290,116138,123879,147040,151525,152006,163859,165918,200933,220441,257218,283450,378…	AKT1,CBLB,CDC34,DTX1,PHC1,NFE2L2,UBE2L3,TRIM26,USP5,AXIN1,TNKS,SOCS2,SOCS3,CTR9,RNF40,UBA2,HUWE1,STUB1,PCGF3,PIAS3,UBAC1,APPBP2,OS9,KLHL2,FBXO21,TRIM2,ANAPC13,UBE2S,PRPF19,UBE2T,RNF141,RLIM,BFAR,DTL,TRIM44,DCAF16,RNF43,DET1,UBR7,MSL2,RNF126,RNF114,RNF213,IRF2BPL,RNF128,MUL1,VCPIP1,FAAP100,CDK5RAP3,KLHL15,PCGF6,PCGF5,FBH1,TRIM15,ARRDC1,FBXO17,KLHDC3,DCUN1D3,KCTD11,WDSUB1,RNF38,SDE2,RNF168,FBXO45,R…
14_Member	GO Biological Processes	GO:0016567	protein ubiquitination	-9.22515	-6.43551	65/670	207,868,997,1840,1911,4780,7332,7726,8078,8312,8658,8835,9021,9646,9810,10075,10273,10336,10422,10513,10956,11275,23014,23321,25847,27338,27339,29089,50862,51132,51283,51514,54765,54876,54894,55070,55148,55167,55658,55905,57674,64207,79589,79594,80124,80233,80311,84108,84333,84893,89870,92714,115290,116138,147040,151525,152006,163859,165918,200933,220441,257218,283450,378925,400569	AKT1,CBLB,CDC34,DTX1,PHC1,NFE2L2,UBE2L3,TRIM26,USP5,AXIN1,TNKS,SOCS2,SOCS3,CTR9,RNF40,HUWE1,STUB1,PCGF3,UBAC1,APPBP2,OS9,KLHL2,FBXO21,TRIM2,ANAPC13,UBE2S,PRPF19,UBE2T,RNF141,RLIM,BFAR,DTL,TRIM44,DCAF16,RNF43,DET1,UBR7,MSL2,RNF126,RNF114,RNF213,IRF2BPL,RNF128,MUL1,VCPIP1,FAAP100,KLHL15,PCGF6,PCGF5,FBH1,TRIM15,ARRDC1,FBXO17,KLHDC3,KCTD11,WDSUB1,RNF38,SDE2,RNF168,FBXO45,RNF152,SHPRH,HECTD4,RNF148,ME…
14_Member	GO Biological Processes	GO:0051603	proteolysis involved in cellular protein catabolic process	-7.25622	-4.7736	56/608	821,997,1513,1514,4780,5516,5641,5693,5702,7332,7993,8078,8192,8266,8722,9810,10040,10075,10273,10444,10513,10524,10613,10730,10845,10956,23014,23321,27243,27338,27339,51132,51283,51439,51514,54442,54894,54994,55658,55741,55905,57132,57674,79589,79643,80311,80700,84640,89853,92714,115290,116138,165918,200933,378925,554251	CANX,CDC34,CTSK,CTSL,NFE2L2,PPP2CB,LGMN,PSMB5,PSMC3,UBE2L3,UBXN8,USP5,CLPP,UBL4A,CTSF,RNF40,TOM1L1,HUWE1,STUB1,ZER1,APPBP2,KAT5,ERLIN1,YME1L1,CLPX,OS9,FBXO21,TRIM2,CHMP2A,UBE2S,PRPF19,RLIM,BFAR,FAM8A1,DTL,KCTD5,RNF43,GID8,RNF126,EDEM2,RNF114,CHMP1B,RNF213,RNF128,CHMP6,KLHL15,UBXN6,USP38,MVB12B,ARRDC1,FBXO17,KLHDC3,RNF168,FBXO45,RNF148,FBXO48
14_Member	GO Biological Processes	GO:0030163	protein catabolic process	-6.78302	-4.3766	60/693	207,472,821,997,1513,1514,3949,4780,5516,5641,5693,5702,7332,7993,8078,8192,8266,8722,9810,10040,10075,10273,10444,10513,10524,10613,10730,10845,10956,23014,23321,27243,27338,27339,51132,51283,51439,51514,54442,54894,54994,55658,55741,55850,55905,57132,57674,79589,79643,80311,80700,84640,89853,92714,115290,116138,165918,200933,378925,554251	AKT1,ATM,CANX,CDC34,CTSK,CTSL,LDLR,NFE2L2,PPP2CB,LGMN,PSMB5,PSMC3,UBE2L3,UBXN8,USP5,CLPP,UBL4A,CTSF,RNF40,TOM1L1,HUWE1,STUB1,ZER1,APPBP2,KAT5,ERLIN1,YME1L1,CLPX,OS9,FBXO21,TRIM2,CHMP2A,UBE2S,PRPF19,RLIM,BFAR,FAM8A1,DTL,KCTD5,RNF43,GID8,RNF126,EDEM2,USE1,RNF114,CHMP1B,RNF213,RNF128,CHMP6,KLHL15,UBXN6,USP38,MVB12B,ARRDC1,FBXO17,KLHDC3,RNF168,FBXO45,RNF148,FBXO48
14_Member	GO Biological Processes	GO:0044257	cellular protein catabolic process	-6.56432	-4.1915	56/638	821,997,1513,1514,4780,5516,5641,5693,5702,7332,7993,8078,8192,8266,8722,9810,10040,10075,10273,10444,10513,10524,10613,10730,10845,10956,23014,23321,27243,27338,27339,51132,51283,51439,51514,54442,54894,54994,55658,55741,55905,57132,57674,79589,79643,80311,80700,84640,89853,92714,115290,116138,165918,200933,378925,554251	CANX,CDC34,CTSK,CTSL,NFE2L2,PPP2CB,LGMN,PSMB5,PSMC3,UBE2L3,UBXN8,USP5,CLPP,UBL4A,CTSF,RNF40,TOM1L1,HUWE1,STUB1,ZER1,APPBP2,KAT5,ERLIN1,YME1L1,CLPX,OS9,FBXO21,TRIM2,CHMP2A,UBE2S,PRPF19,RLIM,BFAR,FAM8A1,DTL,KCTD5,RNF43,GID8,RNF126,EDEM2,RNF114,CHMP1B,RNF213,RNF128,CHMP6,KLHL15,UBXN6,USP38,MVB12B,ARRDC1,FBXO17,KLHDC3,RNF168,FBXO45,RNF148,FBXO48
14_Member	GO Biological Processes	GO:0006511	ubiquitin-dependent protein catabolic process	-5.11423	-2.96141	45/526	821,997,4780,5516,5702,7332,7993,8078,8266,9810,10040,10075,10273,10513,10524,10613,10956,23014,23321,27243,27338,51132,51283,51439,51514,54442,54894,54994,55658,55741,55905,57132,57674,79589,79643,80311,84640,89853,92714,115290,116138,165918,200933,378925,554251	CANX,CDC34,NFE2L2,PPP2CB,PSMC3,UBE2L3,UBXN8,USP5,UBL4A,RNF40,TOM1L1,HUWE1,STUB1,APPBP2,KAT5,ERLIN1,OS9,FBXO21,TRIM2,CHMP2A,UBE2S,RLIM,BFAR,FAM8A1,DTL,KCTD5,RNF43,GID8,RNF126,EDEM2,RNF114,CHMP1B,RNF213,RNF128,CHMP6,KLHL15,USP38,MVB12B,ARRDC1,FBXO17,KLHDC3,RNF168,FBXO45,RNF148,FBXO48
14_Member	GO Biological Processes	GO:0019941	modification-dependent protein catabolic process	-4.90765	-2.79216	45/536	821,997,4780,5516,5702,7332,7993,8078,8266,9810,10040,10075,10273,10513,10524,10613,10956,23014,23321,27243,27338,51132,51283,51439,51514,54442,54894,54994,55658,55741,55905,57132,57674,79589,79643,80311,84640,89853,92714,115290,116138,165918,200933,378925,554251	CANX,CDC34,NFE2L2,PPP2CB,PSMC3,UBE2L3,UBXN8,USP5,UBL4A,RNF40,TOM1L1,HUWE1,STUB1,APPBP2,KAT5,ERLIN1,OS9,FBXO21,TRIM2,CHMP2A,UBE2S,RLIM,BFAR,FAM8A1,DTL,KCTD5,RNF43,GID8,RNF126,EDEM2,RNF114,CHMP1B,RNF213,RNF128,CHMP6,KLHL15,USP38,MVB12B,ARRDC1,FBXO17,KLHDC3,RNF168,FBXO45,RNF148,FBXO48
14_Member	GO Molecular Functions	GO:0019787	ubiquitin-like protein transferase activity	-4.86696	-2.75655	40/456	868,997,1840,7332,7726,8266,9810,10075,10273,10401,23014,23321,27338,27339,29089,50862,51132,51283,51514,54765,54894,55148,55167,55658,55905,57674,64207,79589,79594,89870,91694,115290,151525,152006,165918,220441,257218,283450,378925,400569	CBLB,CDC34,DTX1,UBE2L3,TRIM26,UBL4A,RNF40,HUWE1,STUB1,PIAS3,FBXO21,TRIM2,UBE2S,PRPF19,UBE2T,RNF141,RLIM,BFAR,DTL,TRIM44,RNF43,UBR7,MSL2,RNF126,RNF114,RNF213,IRF2BPL,RNF128,MUL1,TRIM15,LONRF1,FBXO17,WDSUB1,RNF38,RNF168,RNF152,SHPRH,HECTD4,RNF148,MED11
14_Member	GO Biological Processes	GO:0043632	modification-dependent macromolecule catabolic process	-4.68891	-2.62852	45/547	821,997,4780,5516,5702,7332,7993,8078,8266,9810,10040,10075,10273,10513,10524,10613,10956,23014,23321,27243,27338,51132,51283,51439,51514,54442,54894,54994,55658,55741,55905,57132,57674,79589,79643,80311,84640,89853,92714,115290,116138,165918,200933,378925,554251	CANX,CDC34,NFE2L2,PPP2CB,PSMC3,UBE2L3,UBXN8,USP5,UBL4A,RNF40,TOM1L1,HUWE1,STUB1,APPBP2,KAT5,ERLIN1,OS9,FBXO21,TRIM2,CHMP2A,UBE2S,RLIM,BFAR,FAM8A1,DTL,KCTD5,RNF43,GID8,RNF126,EDEM2,RNF114,CHMP1B,RNF213,RNF128,CHMP6,KLHL15,USP38,MVB12B,ARRDC1,FBXO17,KLHDC3,RNF168,FBXO45,RNF148,FBXO48
14_Member	GO Molecular Functions	GO:0004842	ubiquitin-protein transferase activity	-4.68254	-2.62663	38/432	868,997,1840,7332,7726,9810,10075,10273,23014,23321,27338,27339,29089,50862,51132,51283,51514,54765,54894,55148,55167,55658,55905,57674,64207,79589,79594,89870,91694,115290,151525,152006,165918,220441,257218,283450,378925,400569	CBLB,CDC34,DTX1,UBE2L3,TRIM26,RNF40,HUWE1,STUB1,FBXO21,TRIM2,UBE2S,PRPF19,UBE2T,RNF141,RLIM,BFAR,DTL,TRIM44,RNF43,UBR7,MSL2,RNF126,RNF114,RNF213,IRF2BPL,RNF128,MUL1,TRIM15,LONRF1,FBXO17,WDSUB1,RNF38,RNF168,RNF152,SHPRH,HECTD4,RNF148,MED11
14_Member	GO Biological Processes	GO:0070534	protein K63-linked ubiquitination	-4.0954	-2.1687	9/44	10273,27338,27339,29089,51283,55658,57674,165918,220441	STUB1,UBE2S,PRPF19,UBE2T,BFAR,RNF126,RNF213,RNF168,RNF152
14_Member	GO Molecular Functions	GO:0061659	ubiquitin-like protein ligase activity	-3.85349	-1.9803	29/324	868,1840,7726,9810,10075,10273,10401,23321,27339,51132,51283,54765,54894,55148,55167,55658,55905,57674,64207,79589,79594,89870,91694,115290,152006,220441,257218,378925,400569	CBLB,DTX1,TRIM26,RNF40,HUWE1,STUB1,PIAS3,TRIM2,PRPF19,RLIM,BFAR,TRIM44,RNF43,UBR7,MSL2,RNF126,RNF114,RNF213,IRF2BPL,RNF128,MUL1,TRIM15,LONRF1,FBXO17,RNF38,RNF152,SHPRH,RNF148,MED11
14_Member	GO Molecular Functions	GO:0061630	ubiquitin protein ligase activity	-3.76142	-1.91464	28/312	868,1840,7726,9810,10075,10273,23321,27339,51132,51283,54765,54894,55148,55167,55658,55905,57674,64207,79589,79594,89870,91694,115290,152006,220441,257218,378925,400569	CBLB,DTX1,TRIM26,RNF40,HUWE1,STUB1,TRIM2,PRPF19,RLIM,BFAR,TRIM44,RNF43,UBR7,MSL2,RNF126,RNF114,RNF213,IRF2BPL,RNF128,MUL1,TRIM15,LONRF1,FBXO17,RNF38,RNF152,SHPRH,RNF148,MED11
14_Member	GO Biological Processes	GO:0010498	proteasomal protein catabolic process	-3.41647	-1.66159	29/344	821,997,4780,5516,5693,5702,7993,10075,10273,10513,10524,10613,10956,23321,27338,27339,51283,51439,51514,54442,54994,55658,55741,80311,80700,115290,116138,200933,554251	CANX,CDC34,NFE2L2,PPP2CB,PSMB5,PSMC3,UBXN8,HUWE1,STUB1,APPBP2,KAT5,ERLIN1,OS9,TRIM2,UBE2S,PRPF19,BFAR,FAM8A1,DTL,KCTD5,GID8,RNF126,EDEM2,KLHL15,UBXN6,FBXO17,KLHDC3,FBXO45,FBXO48
14_Member	GO Biological Processes	GO:0043161	proteasome-mediated ubiquitin-dependent protein catabolic process	-3.26182	-1.54777	26/302	821,997,4780,5516,5702,7993,10075,10273,10513,10524,10613,10956,23321,27338,51283,51439,51514,54442,54994,55658,55741,80311,115290,116138,200933,554251	CANX,CDC34,NFE2L2,PPP2CB,PSMC3,UBXN8,HUWE1,STUB1,APPBP2,KAT5,ERLIN1,OS9,TRIM2,UBE2S,BFAR,FAM8A1,DTL,KCTD5,GID8,RNF126,EDEM2,KLHL15,FBXO17,KLHDC3,FBXO45,FBXO48
14_Member	GO Biological Processes	GO:0000209	protein polyubiquitination	-2.80976	-1.2376	20/225	997,7332,8312,8658,10075,10273,23321,25847,27338,27339,29089,51283,51514,55658,55905,57674,79594,165918,220441,257218	CDC34,UBE2L3,AXIN1,TNKS,HUWE1,STUB1,TRIM2,ANAPC13,UBE2S,PRPF19,UBE2T,BFAR,DTL,RNF126,RNF114,RNF213,MUL1,RNF168,RNF152,SHPRH
15_Summary	GO Biological Processes	GO:1903311	regulation of mRNA metabolic process	-8.98392	-6.24004	38/293	207,984,1025,1660,3192,5935,6433,6626,7072,7538,8087,8148,9238,9337,9646,9810,9939,10492,10768,10949,11338,22849,22938,27257,27327,27339,29896,51341,54855,55234,55603,55795,56829,56915,57690,80149,115024,255967,468,1653,1975,2107,3479,3491,4690,4780,5300,5621,6311,6726,7458,7555,8662,8664,8672,8892,9689,10131,10313,23410,23645,28958,28969,29063,83759,84919,127933,143689,192669,406991,2553,5702,61…	AKT1,CDK11B,CDK9,DHX9,HNRNPU,RBM3,SFSWAP,SNRPA,TIA1,ZFP36,FXR1,TAF15,TBRG4,CNOT8,CTR9,RNF40,RBM8A,SYNCRIP,AHCYL1,HNRNPA0,U2AF2,CPEB3,SNW1,LSM1,TNRC6A,PRPF19,TRA2A,ZBTB7A,TENT5C,SMU1,TENT5A,PCID2,ZC3HAV1,EXOSC5,TNRC6C,ZC3H12A,NT5C3B,PAN3,ATF4,DDX1,EIF4B,ETF1,IGF1,CCN1,NCK1,NFE2L2,PIN1,PRNP,ATXN2,SRP9,EIF4H,CNBP,EIF3B,EIF3D,EIF4G3,EIF2B2,BZW1,TRAP1,RTN3,SIRT3,PPP1R15A,COA3,BZW2,ZCCHC4,RBM4B,PPP1R15…
15_Member	GO Biological Processes	GO:1903311	regulation of mRNA metabolic process	-8.98392	-6.24004	38/293	207,984,1025,1660,3192,5935,6433,6626,7072,7538,8087,8148,9238,9337,9646,9810,9939,10492,10768,10949,11338,22849,22938,27257,27327,27339,29896,51341,54855,55234,55603,55795,56829,56915,57690,80149,115024,255967	AKT1,CDK11B,CDK9,DHX9,HNRNPU,RBM3,SFSWAP,SNRPA,TIA1,ZFP36,FXR1,TAF15,TBRG4,CNOT8,CTR9,RNF40,RBM8A,SYNCRIP,AHCYL1,HNRNPA0,U2AF2,CPEB3,SNW1,LSM1,TNRC6A,PRPF19,TRA2A,ZBTB7A,TENT5C,SMU1,TENT5A,PCID2,ZC3HAV1,EXOSC5,TNRC6C,ZC3H12A,NT5C3B,PAN3
15_Member	GO Biological Processes	GO:0034248	regulation of cellular amide metabolic process	-6.94051	-4.51885	50/527	207,468,1653,1660,1975,2107,3192,3479,3491,4690,4780,5300,5621,5935,6311,6726,7072,7458,7538,7555,8087,8662,8664,8672,8892,9337,9689,9939,10131,10313,10492,22849,23410,23645,27257,27327,28958,28969,29063,56915,57690,80149,83759,84919,115024,127933,143689,192669,255967,406991	AKT1,ATF4,DDX1,DHX9,EIF4B,ETF1,HNRNPU,IGF1,CCN1,NCK1,NFE2L2,PIN1,PRNP,RBM3,ATXN2,SRP9,TIA1,EIF4H,ZFP36,CNBP,FXR1,EIF3B,EIF3D,EIF4G3,EIF2B2,CNOT8,BZW1,RBM8A,TRAP1,RTN3,SYNCRIP,CPEB3,SIRT3,PPP1R15A,LSM1,TNRC6A,COA3,BZW2,ZCCHC4,EXOSC5,TNRC6C,ZC3H12A,RBM4B,PPP1R15B,NT5C3B,UHMK1,PIWIL4,AGO3,PAN3,MIR21
15_Member	GO Cellular Components	GO:0036464	cytoplasmic ribonucleoprotein granule	-6.24464	-3.90302	29/243	1025,1653,1660,2553,3192,5702,6175,6311,6461,7072,7538,8087,9337,11030,11269,23215,23741,27257,27327,29760,55629,57690,80149,127933,143689,192669,200316,203228,255967	CDK9,DDX1,DHX9,GABPB1,HNRNPU,PSMC3,RPLP0,ATXN2,SHB,TIA1,ZFP36,FXR1,CNOT8,RBPMS,DDX19B,PRRC2C,EID1,LSM1,TNRC6A,BLNK,PNRC2,TNRC6C,ZC3H12A,UHMK1,PIWIL4,AGO3,APOBEC3F,C9orf72,PAN3
15_Member	GO Cellular Components	GO:0035770	ribonucleoprotein granule	-6.08747	-3.76272	30/261	1025,1653,1660,2553,3192,5702,6175,6311,6461,7072,7538,8087,9238,9337,11030,11269,23215,23741,27257,27327,29760,55629,57690,80149,127933,143689,192669,200316,203228,255967	CDK9,DDX1,DHX9,GABPB1,HNRNPU,PSMC3,RPLP0,ATXN2,SHB,TIA1,ZFP36,FXR1,TBRG4,CNOT8,RBPMS,DDX19B,PRRC2C,EID1,LSM1,TNRC6A,BLNK,PNRC2,TNRC6C,ZC3H12A,UHMK1,PIWIL4,AGO3,APOBEC3F,C9orf72,PAN3
15_Member	GO Biological Processes	GO:0061013	regulation of mRNA catabolic process	-5.93754	-3.64081	23/172	207,1660,3192,7538,8087,8148,9238,9337,9939,10492,10949,22849,27257,27327,54855,55603,55795,56829,56915,57690,80149,115024,255967	AKT1,DHX9,HNRNPU,ZFP36,FXR1,TAF15,TBRG4,CNOT8,RBM8A,SYNCRIP,HNRNPA0,CPEB3,LSM1,TNRC6A,TENT5C,TENT5A,PCID2,ZC3HAV1,EXOSC5,TNRC6C,ZC3H12A,NT5C3B,PAN3
15_Member	GO Biological Processes	GO:0006417	regulation of translation	-5.79178	-3.51403	43/464	207,468,1653,1660,1975,2107,3192,4690,5935,6311,6726,7072,7458,7538,7555,8087,8662,8664,8672,8892,9337,9689,9939,10131,10492,22849,23645,27257,27327,28958,28969,29063,56915,57690,80149,83759,84919,115024,127933,143689,192669,255967,406991	AKT1,ATF4,DDX1,DHX9,EIF4B,ETF1,HNRNPU,NCK1,RBM3,ATXN2,SRP9,TIA1,EIF4H,ZFP36,CNBP,FXR1,EIF3B,EIF3D,EIF4G3,EIF2B2,CNOT8,BZW1,RBM8A,TRAP1,SYNCRIP,CPEB3,PPP1R15A,LSM1,TNRC6A,COA3,BZW2,ZCCHC4,EXOSC5,TNRC6C,ZC3H12A,RBM4B,PPP1R15B,NT5C3B,UHMK1,PIWIL4,AGO3,PAN3,MIR21
15_Member	GO Biological Processes	GO:0043487	regulation of RNA stability	-5.09468	-2.94739	21/166	207,1660,1797,3192,7538,8087,8148,9238,9337,10492,10949,22849,27257,54855,55603,55795,56915,57690,80149,115024,255967	AKT1,DHX9,DXO,HNRNPU,ZFP36,FXR1,TAF15,TBRG4,CNOT8,SYNCRIP,HNRNPA0,CPEB3,LSM1,TENT5C,TENT5A,PCID2,EXOSC5,TNRC6C,ZC3H12A,NT5C3B,PAN3
15_Member	GO Biological Processes	GO:0043488	regulation of mRNA stability	-5.05447	-2.91265	20/154	207,1660,3192,7538,8087,8148,9238,9337,10492,10949,22849,27257,54855,55603,55795,56915,57690,80149,115024,255967	AKT1,DHX9,HNRNPU,ZFP36,FXR1,TAF15,TBRG4,CNOT8,SYNCRIP,HNRNPA0,CPEB3,LSM1,TENT5C,TENT5A,PCID2,EXOSC5,TNRC6C,ZC3H12A,NT5C3B,PAN3
15_Member	GO Biological Processes	GO:1903313	positive regulation of mRNA metabolic process	-4.01143	-2.10482	15/114	5935,7538,9337,22849,22938,27257,27327,27339,29896,56829,56915,57690,80149,115024,255967	RBM3,ZFP36,CNOT8,CPEB3,SNW1,LSM1,TNRC6A,PRPF19,TRA2A,ZC3HAV1,EXOSC5,TNRC6C,ZC3H12A,NT5C3B,PAN3
15_Member	GO Cellular Components	GO:0000932	P-body	-3.82211	-1.95761	13/93	5702,7538,9337,11030,27257,27327,55629,57690,80149,192669,200316,203228,255967	PSMC3,ZFP36,CNOT8,RBPMS,LSM1,TNRC6A,PNRC2,TNRC6C,ZC3H12A,AGO3,APOBEC3F,C9orf72,PAN3
15_Member	GO Biological Processes	GO:0061014	positive regulation of mRNA catabolic process	-3.07805	-1.42542	11/84	7538,9337,22849,27257,27327,56829,56915,57690,80149,115024,255967	ZFP36,CNOT8,CPEB3,LSM1,TNRC6A,ZC3HAV1,EXOSC5,TNRC6C,ZC3H12A,NT5C3B,PAN3
15_Member	GO Biological Processes	GO:0050779	RNA destabilization	-2.4762	-1.01449	9/72	1797,7538,9337,22849,27257,56915,80149,115024,255967	DXO,ZFP36,CNOT8,CPEB3,LSM1,EXOSC5,ZC3H12A,NT5C3B,PAN3
15_Member	GO Biological Processes	GO:0034249	negative regulation of cellular amide metabolic process	-2.26963	-0.876478	21/268	468,3479,5300,5621,6726,7072,7538,8087,9337,10313,10492,22849,27257,27327,56915,57690,80149,115024,192669,255967,406991	ATF4,IGF1,PIN1,PRNP,SRP9,TIA1,ZFP36,FXR1,CNOT8,RTN3,SYNCRIP,CPEB3,LSM1,TNRC6A,EXOSC5,TNRC6C,ZC3H12A,NT5C3B,AGO3,PAN3,MIR21
15_Member	GO Biological Processes	GO:0000288	nuclear-transcribed mRNA catabolic process, deadenylation-dependent decay	-2.24654	-0.861539	6/39	7538,9337,27257,56915,115024,255967	ZFP36,CNOT8,LSM1,EXOSC5,NT5C3B,PAN3
15_Member	GO Biological Processes	GO:0061157	mRNA destabilization	-2.0987	-0.754496	8/68	7538,9337,22849,27257,56915,80149,115024,255967	ZFP36,CNOT8,CPEB3,LSM1,EXOSC5,ZC3H12A,NT5C3B,PAN3
16_Summary	GO Biological Processes	GO:0080135	regulation of cellular response to stress	-8.65918	-5.92603	65/692	142,207,468,472,545,598,1025,1660,2033,2671,3276,4170,4216,4233,4609,4616,4671,4690,4780,5531,6419,7178,7376,7468,7913,8087,8312,8578,9314,9529,9821,9860,10114,10131,10524,10912,11179,11221,11315,23049,23126,23347,23645,26156,50640,51283,51548,51720,54386,54407,55702,56897,56950,64853,80149,80311,80824,84893,84919,90441,149628,151987,165918,284361,406991,3192,4297,4683,5985,6778,8658,9760,10419,1…	PARP1,AKT1,ATF4,ATM,ATR,BCL2L1,CDK9,DHX9,EP300,GFER,PRMT1,MCL1,MAP3K4,MET,MYC,GADD45B,NAIP,NCK1,NFE2L2,PPP4C,SETMAR,TPT1,NR1H2,NSD2,DEK,FXR1,AXIN1,SCARF1,KLF4,BAG5,RB1CC1,LRIG2,HIPK3,TRAP1,KAT5,GADD45G,ZNF277,DUSP10,PARK7,SMG1,POGZ,SMCHD1,PPP1R15A,RSL1D1,PNPLA8,BFAR,SIRT6,UIMC1,TERF2IP,SLC38A2,YJU2,WRNIP1,SMYD2,AIDA,ZC3H12A,KLHL15,DUSP16,FBH1,PPP1R15B,ZNF622,PYHIN1,PPP4R2,RNF168,EMC10,MIR21,HNRNP…
16_Member	GO Biological Processes	GO:0080135	regulation of cellular response to stress	-8.65918	-5.92603	65/692	142,207,468,472,545,598,1025,1660,2033,2671,3276,4170,4216,4233,4609,4616,4671,4690,4780,5531,6419,7178,7376,7468,7913,8087,8312,8578,9314,9529,9821,9860,10114,10131,10524,10912,11179,11221,11315,23049,23126,23347,23645,26156,50640,51283,51548,51720,54386,54407,55702,56897,56950,64853,80149,80311,80824,84893,84919,90441,149628,151987,165918,284361,406991	PARP1,AKT1,ATF4,ATM,ATR,BCL2L1,CDK9,DHX9,EP300,GFER,PRMT1,MCL1,MAP3K4,MET,MYC,GADD45B,NAIP,NCK1,NFE2L2,PPP4C,SETMAR,TPT1,NR1H2,NSD2,DEK,FXR1,AXIN1,SCARF1,KLF4,BAG5,RB1CC1,LRIG2,HIPK3,TRAP1,KAT5,GADD45G,ZNF277,DUSP10,PARK7,SMG1,POGZ,SMCHD1,PPP1R15A,RSL1D1,PNPLA8,BFAR,SIRT6,UIMC1,TERF2IP,SLC38A2,YJU2,WRNIP1,SMYD2,AIDA,ZC3H12A,KLHL15,DUSP16,FBH1,PPP1R15B,ZNF622,PYHIN1,PPP4R2,RNF168,EMC10,MIR21
16_Member	GO Biological Processes	GO:0051052	regulation of DNA metabolic process	-7.89982	-5.30206	44/404	142,207,472,545,1025,1660,2671,3192,4216,4297,4609,4683,5531,5985,6419,6778,7468,7913,8658,9314,9760,10419,10524,10576,10891,23049,23126,23293,23347,29844,51548,51720,54386,54891,54921,56252,56897,56941,80311,84464,84893,125476,151987,165918	PARP1,AKT1,ATM,ATR,CDK9,DHX9,GFER,HNRNPU,MAP3K4,KMT2A,MYC,NBN,PPP4C,RFC5,SETMAR,STAT6,NSD2,DEK,TNKS,KLF4,TOX,PRMT5,KAT5,CCT2,PPARGC1A,SMG1,POGZ,SMG6,SMCHD1,TFPT,SIRT6,UIMC1,TERF2IP,INO80D,CHTF8,YLPM1,WRNIP1,HMCES,KLHL15,SLX4,FBH1,INO80C,PPP4R2,RNF168
16_Member	GO Biological Processes	GO:2001020	regulation of response to DNA damage stimulus	-6.13349	-3.80458	29/246	142,472,545,598,1025,1660,4170,4609,5531,6419,7178,7468,7913,8087,10524,23049,23126,23347,51548,51720,54386,55702,56897,56950,80311,84893,149628,151987,165918	PARP1,ATM,ATR,BCL2L1,CDK9,DHX9,MCL1,MYC,PPP4C,SETMAR,TPT1,NSD2,DEK,FXR1,KAT5,SMG1,POGZ,SMCHD1,SIRT6,UIMC1,TERF2IP,YJU2,WRNIP1,SMYD2,KLHL15,FBH1,PYHIN1,PPP4R2,RNF168
16_Member	GO Biological Processes	GO:0051054	positive regulation of DNA metabolic process	-5.68484	-3.42168	27/231	142,207,472,545,1660,2671,4216,4609,4683,5985,6419,6778,7468,8658,9314,9760,10524,10576,10891,23126,23347,51548,51720,54921,56941,84464,165918	PARP1,AKT1,ATM,ATR,DHX9,GFER,MAP3K4,MYC,NBN,RFC5,SETMAR,STAT6,NSD2,TNKS,KLF4,TOX,KAT5,CCT2,PPARGC1A,POGZ,SMCHD1,SIRT6,UIMC1,CHTF8,HMCES,SLX4,RNF168
16_Member	GO Biological Processes	GO:0006282	regulation of DNA repair	-4.07702	-2.15517	18/152	142,1025,1660,5531,6419,7468,7913,10524,23126,23347,51548,51720,54386,56897,80311,84893,151987,165918	PARP1,CDK9,DHX9,PPP4C,SETMAR,NSD2,DEK,KAT5,POGZ,SMCHD1,SIRT6,UIMC1,TERF2IP,WRNIP1,KLHL15,FBH1,PPP4R2,RNF168
16_Member	GO Biological Processes	GO:0010569	regulation of double-strand break repair via homologous recombination	-3.14581	-1.47103	10/70	142,5531,10524,23126,23347,51548,54386,80311,84893,151987	PARP1,PPP4C,KAT5,POGZ,SMCHD1,SIRT6,TERF2IP,KLHL15,FBH1,PPP4R2
16_Member	GO Biological Processes	GO:2000779	regulation of double-strand break repair	-3.10065	-1.44076	13/110	142,5531,6419,7468,7913,10524,23126,23347,51548,54386,80311,84893,151987	PARP1,PPP4C,SETMAR,NSD2,DEK,KAT5,POGZ,SMCHD1,SIRT6,TERF2IP,KLHL15,FBH1,PPP4R2
16_Member	GO Biological Processes	GO:2001022	positive regulation of response to DNA damage stimulus	-2.92616	-1.32008	14/129	142,472,545,1660,4609,6419,8087,10524,23126,23347,51720,84893,149628,165918	PARP1,ATM,ATR,DHX9,MYC,SETMAR,FXR1,KAT5,POGZ,SMCHD1,UIMC1,FBH1,PYHIN1,RNF168
16_Member	GO Biological Processes	GO:0000018	regulation of DNA recombination	-2.41445	-0.978062	13/131	142,5531,6778,7468,10524,23126,23347,51548,54386,56941,80311,84893,151987	PARP1,PPP4C,STAT6,NSD2,KAT5,POGZ,SMCHD1,SIRT6,TERF2IP,HMCES,KLHL15,FBH1,PPP4R2
17_Summary	GO Biological Processes	GO:1903047	mitotic cell cycle process	-8.51736	-5.81487	52/500	375,388,472,675,890,997,1019,1027,1063,1263,1763,2029,4134,4609,4683,6419,7273,7465,8658,8815,9113,10253,10726,23122,23126,23503,25949,27175,27243,27338,29127,29997,51203,51429,51514,51720,54627,54921,55125,55755,57132,58480,65123,79643,80279,81929,84445,84936,91603,148479,163859,200942,984,4603,5777,8021,80124,382,3192,4750,5500,5899,7005,8650,9253,10807,22897,22919,23331,25847,51490,55137,57553…	ARF1,RHOB,ATM,BRCA2,CCNA2,CDC34,CDK4,CDKN1B,CENPF,PLK3,DNA2,ENSA,MAP4,MYC,NBN,SETMAR,TTN,WEE1,TNKS,BANF1,LATS1,SPRY2,NUDC,CLASP2,POGZ,ZFYVE26,SYF2,TUBG2,CHMP2A,UBE2S,RACGAP1,NOP53,NUSAP1,SNX9,DTL,UIMC1,MAP10,CHTF8,CEP192,CDK5RAP2,CHMP1B,RHOU,INTS3,CHMP6,CDK5RAP3,SEH1L,LZTS2,ZFYVE19,ZNF830,PHF13,SDE2,KLHDC8B,CDK11B,MYBL1,PTPN6,NUP214,VCPIP1,ARF6,HNRNPU,NEK1,PPP1CB,RALB,TEAD3,NUMB,NUMBL,ENTR1,CEP16…
17_Member	GO Biological Processes	GO:1903047	mitotic cell cycle process	-8.51736	-5.81487	52/500	375,388,472,675,890,997,1019,1027,1063,1263,1763,2029,4134,4609,4683,6419,7273,7465,8658,8815,9113,10253,10726,23122,23126,23503,25949,27175,27243,27338,29127,29997,51203,51429,51514,51720,54627,54921,55125,55755,57132,58480,65123,79643,80279,81929,84445,84936,91603,148479,163859,200942	ARF1,RHOB,ATM,BRCA2,CCNA2,CDC34,CDK4,CDKN1B,CENPF,PLK3,DNA2,ENSA,MAP4,MYC,NBN,SETMAR,TTN,WEE1,TNKS,BANF1,LATS1,SPRY2,NUDC,CLASP2,POGZ,ZFYVE26,SYF2,TUBG2,CHMP2A,UBE2S,RACGAP1,NOP53,NUSAP1,SNX9,DTL,UIMC1,MAP10,CHTF8,CEP192,CDK5RAP2,CHMP1B,RHOU,INTS3,CHMP6,CDK5RAP3,SEH1L,LZTS2,ZFYVE19,ZNF830,PHF13,SDE2,KLHDC8B
17_Member	GO Biological Processes	GO:0000278	mitotic cell cycle	-8.15354	-5.51517	57/588	375,388,472,675,890,984,997,1019,1027,1063,1263,1763,2029,4134,4603,4609,4683,5777,6419,7273,7465,8021,8658,8815,9113,10253,10726,23122,23126,23503,25949,27175,27243,27338,29127,29997,51203,51429,51514,51720,54627,54921,55125,55755,57132,58480,65123,79643,80124,80279,81929,84445,84936,91603,148479,163859,200942	ARF1,RHOB,ATM,BRCA2,CCNA2,CDK11B,CDC34,CDK4,CDKN1B,CENPF,PLK3,DNA2,ENSA,MAP4,MYBL1,MYC,NBN,PTPN6,SETMAR,TTN,WEE1,NUP214,TNKS,BANF1,LATS1,SPRY2,NUDC,CLASP2,POGZ,ZFYVE26,SYF2,TUBG2,CHMP2A,UBE2S,RACGAP1,NOP53,NUSAP1,SNX9,DTL,UIMC1,MAP10,CHTF8,CEP192,CDK5RAP2,CHMP1B,RHOU,INTS3,CHMP6,VCPIP1,CDK5RAP3,SEH1L,LZTS2,ZFYVE19,ZNF830,PHF13,SDE2,KLHDC8B
17_Member	GO Biological Processes	GO:0051301	cell division	-7.88631	-5.29624	50/492	375,382,388,890,1019,1063,2029,3192,4134,4750,5500,5899,7005,7465,8650,8658,9113,9253,10726,10807,22897,22919,23122,23126,23331,23503,25847,27243,27338,29127,51203,51429,51490,54627,55137,57132,57553,79643,79866,79892,81929,83872,84445,84936,91603,117583,148479,163859,200942,201161	ARF1,ARF6,RHOB,CCNA2,CDK4,CENPF,ENSA,HNRNPU,MAP4,NEK1,PPP1CB,RALB,TEAD3,WEE1,NUMB,TNKS,LATS1,NUMBL,NUDC,ENTR1,CEP164,MAPRE1,CLASP2,POGZ,TTC28,ZFYVE26,ANAPC13,CHMP2A,UBE2S,RACGAP1,NUSAP1,SNX9,SPOUT1,MAP10,FIGN,CHMP1B,MICAL3,CHMP6,BORA,MCMBP,SEH1L,HMCN1,LZTS2,ZFYVE19,ZNF830,PARD3B,PHF13,SDE2,KLHDC8B,CENPV
17_Member	GO Biological Processes	GO:0140014	mitotic nuclear division	-3.55784	-1.767	18/167	7273,8815,10726,23122,23126,27175,27243,27338,29127,51203,54627,54921,55125,57132,79643,81929,148479,200942	TTN,BANF1,NUDC,CLASP2,POGZ,TUBG2,CHMP2A,UBE2S,RACGAP1,NUSAP1,MAP10,CHTF8,CEP192,CHMP1B,CHMP6,SEH1L,PHF13,KLHDC8B
17_Member	GO Biological Processes	GO:0000819	sister chromatid segregation	-3.37553	-1.63705	16/144	7273,9113,10726,23126,27175,27243,29127,51203,54627,54921,57132,64940,79643,79892,81929,148479	TTN,LATS1,NUDC,POGZ,TUBG2,CHMP2A,RACGAP1,NUSAP1,MAP10,CHTF8,CHMP1B,STAG3L4,CHMP6,MCMBP,SEH1L,PHF13
17_Member	GO Biological Processes	GO:0007059	chromosome segregation	-2.96713	-1.34628	24/283	472,1063,7273,8815,9113,10726,23126,27175,27243,28989,29127,51203,54627,54921,55755,57132,64940,79643,79892,81929,84191,84464,148479,200942	ATM,CENPF,TTN,BANF1,LATS1,NUDC,POGZ,TUBG2,CHMP2A,NTMT1,RACGAP1,NUSAP1,MAP10,CHTF8,CDK5RAP2,CHMP1B,STAG3L4,CHMP6,MCMBP,SEH1L,CIAO2A,SLX4,PHF13,KLHDC8B
17_Member	GO Biological Processes	GO:0000070	mitotic sister chromatid segregation	-2.85049	-1.26798	13/117	7273,10726,23126,27175,27243,29127,51203,54627,54921,57132,79643,81929,148479	TTN,NUDC,POGZ,TUBG2,CHMP2A,RACGAP1,NUSAP1,MAP10,CHTF8,CHMP1B,CHMP6,SEH1L,PHF13
17_Member	GO Biological Processes	GO:0098813	nuclear chromosome segregation	-2.76391	-1.21246	20/227	472,1063,7273,9113,10726,23126,27175,27243,29127,51203,54627,54921,57132,64940,79643,79892,81929,84464,148479,200942	ATM,CENPF,TTN,LATS1,NUDC,POGZ,TUBG2,CHMP2A,RACGAP1,NUSAP1,MAP10,CHTF8,CHMP1B,STAG3L4,CHMP6,MCMBP,SEH1L,SLX4,PHF13,KLHDC8B
17_Member	GO Biological Processes	GO:0048285	organelle fission	-2.36927	-0.94657	25/332	472,675,4603,7273,8815,10005,10726,23122,23126,27175,27243,27338,29127,51203,54627,54921,55125,57132,79594,79643,81929,84464,116138,148479,200942	ATM,BRCA2,MYBL1,TTN,BANF1,ACOT8,NUDC,CLASP2,POGZ,TUBG2,CHMP2A,UBE2S,RACGAP1,NUSAP1,MAP10,CHTF8,CEP192,CHMP1B,MUL1,CHMP6,SEH1L,SLX4,KLHDC3,PHF13,KLHDC8B
17_Member	GO Biological Processes	GO:0000280	nuclear division	-2.1989	-0.824233	23/307	472,675,4603,7273,8815,10726,23122,23126,27175,27243,27338,29127,51203,54627,54921,55125,57132,79643,81929,84464,116138,148479,200942	ATM,BRCA2,MYBL1,TTN,BANF1,NUDC,CLASP2,POGZ,TUBG2,CHMP2A,UBE2S,RACGAP1,NUSAP1,MAP10,CHTF8,CEP192,CHMP1B,CHMP6,SEH1L,SLX4,KLHDC3,PHF13,KLHDC8B
18_Summary	GO Biological Processes	GO:0043549	regulation of kinase activity	-8.46922	-5.78603	69/763	207,374,868,890,1027,1839,1906,1958,1969,2167,3170,3192,3479,3491,4216,4233,4616,4665,4683,5170,5573,5576,5618,5621,5777,5899,6505,6654,6879,7273,8312,8660,8795,8835,8844,8861,9021,9077,9113,9146,9467,10040,10114,10221,10253,10641,10979,11142,11221,11315,11329,29950,51429,51527,54922,55011,55755,55890,56892,57761,64853,65125,79643,79866,80279,80824,81848,90441,406991,4609,5300,5985,6187,7332,8658…	AKT1,AREG,CBLB,CCNA2,CDKN1B,HBEGF,EDN1,EGR1,EPHA2,FABP4,FOXA2,HNRNPU,IGF1,CCN1,MAP3K4,MET,GADD45B,NAB2,NBN,PDPK1,PRKAR1A,PRKAR2A,PRLR,PRNP,PTPN6,RALB,SLC1A1,SOS1,TAF7,TTN,AXIN1,IRS2,TNFRSF10B,SOCS2,KSR1,LDB1,SOCS3,DIRAS3,LATS1,HGS,SH3BP5,TOM1L1,HIPK3,TRIB1,SPRY2,NPRL2,FERMT2,PKIG,DUSP10,PARK7,STK38,SERTAD1,SNX9,GSKIP,RASIP1,PIH1D1,CDK5RAP2,GPRC5C,TCIM,TRIB3,AIDA,WNK1,CHMP6,BORA,CDK5RAP3,DUSP16,SP…
18_Member	GO Biological Processes	GO:0043549	regulation of kinase activity	-8.46922	-5.78603	69/763	207,374,868,890,1027,1839,1906,1958,1969,2167,3170,3192,3479,3491,4216,4233,4616,4665,4683,5170,5573,5576,5618,5621,5777,5899,6505,6654,6879,7273,8312,8660,8795,8835,8844,8861,9021,9077,9113,9146,9467,10040,10114,10221,10253,10641,10979,11142,11221,11315,11329,29950,51429,51527,54922,55011,55755,55890,56892,57761,64853,65125,79643,79866,80279,80824,81848,90441,406991	AKT1,AREG,CBLB,CCNA2,CDKN1B,HBEGF,EDN1,EGR1,EPHA2,FABP4,FOXA2,HNRNPU,IGF1,CCN1,MAP3K4,MET,GADD45B,NAB2,NBN,PDPK1,PRKAR1A,PRKAR2A,PRLR,PRNP,PTPN6,RALB,SLC1A1,SOS1,TAF7,TTN,AXIN1,IRS2,TNFRSF10B,SOCS2,KSR1,LDB1,SOCS3,DIRAS3,LATS1,HGS,SH3BP5,TOM1L1,HIPK3,TRIB1,SPRY2,NPRL2,FERMT2,PKIG,DUSP10,PARK7,STK38,SERTAD1,SNX9,GSKIP,RASIP1,PIH1D1,CDK5RAP2,GPRC5C,TCIM,TRIB3,AIDA,WNK1,CHMP6,BORA,CDK5RAP3,DUSP16,SP…
18_Member	GO Biological Processes	GO:0045859	regulation of protein kinase activity	-7.13223	-4.66135	58/645	207,374,868,890,1027,1839,1906,1958,2167,3479,3491,4216,4616,4665,5170,5573,5576,5618,5621,5777,5899,6505,6654,6879,7273,8312,8795,8844,9077,9113,9146,9467,10040,10114,10221,10253,10979,11142,11221,11315,11329,29950,51429,51527,54922,55011,55755,55890,56892,57761,64853,65125,79643,79866,80279,80824,81848,406991	AKT1,AREG,CBLB,CCNA2,CDKN1B,HBEGF,EDN1,EGR1,FABP4,IGF1,CCN1,MAP3K4,GADD45B,NAB2,PDPK1,PRKAR1A,PRKAR2A,PRLR,PRNP,PTPN6,RALB,SLC1A1,SOS1,TAF7,TTN,AXIN1,TNFRSF10B,KSR1,DIRAS3,LATS1,HGS,SH3BP5,TOM1L1,HIPK3,TRIB1,SPRY2,FERMT2,PKIG,DUSP10,PARK7,STK38,SERTAD1,SNX9,GSKIP,RASIP1,PIH1D1,CDK5RAP2,GPRC5C,TCIM,TRIB3,AIDA,WNK1,CHMP6,BORA,CDK5RAP3,DUSP16,SPRY4,MIR21
18_Member	GO Biological Processes	GO:0051347	positive regulation of transferase activity	-4.78194	-2.69542	46/559	207,374,1027,1839,1906,1958,1969,3479,3491,4216,4233,4609,4665,4683,5170,5300,5618,5621,5899,5985,6187,6505,7332,8312,8658,8795,9314,10040,10253,10273,10576,10979,11315,27338,51429,54921,55011,55890,56892,57515,57761,65125,79866,90441,123879,406991	AKT1,AREG,CDKN1B,HBEGF,EDN1,EGR1,EPHA2,IGF1,CCN1,MAP3K4,MET,MYC,NAB2,NBN,PDPK1,PIN1,PRLR,PRNP,RALB,RFC5,RPS2,SLC1A1,UBE2L3,AXIN1,TNKS,TNFRSF10B,KLF4,TOM1L1,SPRY2,STUB1,CCT2,FERMT2,PARK7,UBE2S,SNX9,CHTF8,PIH1D1,GPRC5C,TCIM,SERINC1,TRIB3,WNK1,BORA,ZNF622,DCUN1D3,MIR21
18_Member	GO Biological Processes	GO:0032147	activation of protein kinase activity	-2.38618	-0.957461	13/132	3479,5170,5618,5621,6505,8312,8795,10040,11315,55890,65125,79866,406991	IGF1,PDPK1,PRLR,PRNP,SLC1A1,AXIN1,TNFRSF10B,TOM1L1,PARK7,GPRC5C,WNK1,BORA,MIR21
18_Member	GO Biological Processes	GO:0001934	positive regulation of protein phosphorylation	-2.36604	-0.943856	46/722	207,374,472,1025,1027,1389,1460,1839,1906,1958,3479,3491,3600,4216,4665,4683,5170,5300,5618,5621,5899,6505,7525,8087,8312,8795,9113,9821,10040,10253,10979,11030,11315,27302,51429,54386,55011,55890,56005,56892,57600,65125,79866,84893,151449,406991	AKT1,AREG,ATM,CDK9,CDKN1B,CREBL2,CSNK2B,HBEGF,EDN1,EGR1,IGF1,CCN1,IL15,MAP3K4,NAB2,NBN,PDPK1,PIN1,PRLR,PRNP,RALB,SLC1A1,YES1,FXR1,AXIN1,TNFRSF10B,LATS1,RB1CC1,TOM1L1,SPRY2,FERMT2,RBPMS,PARK7,BMP10,SNX9,TERF2IP,PIH1D1,GPRC5C,MYDGF,TCIM,FNIP2,WNK1,BORA,FBH1,GDF7,MIR21
18_Member	GO Biological Processes	GO:0045860	positive regulation of protein kinase activity	-2.25471	-0.867336	28/393	207,374,1027,1839,1906,1958,3479,3491,4216,4665,5170,5618,5621,5899,6505,8312,8795,10040,10253,10979,11315,51429,55011,55890,56892,65125,79866,406991	AKT1,AREG,CDKN1B,HBEGF,EDN1,EGR1,IGF1,CCN1,MAP3K4,NAB2,PDPK1,PRLR,PRNP,RALB,SLC1A1,AXIN1,TNFRSF10B,TOM1L1,SPRY2,FERMT2,PARK7,SNX9,PIH1D1,GPRC5C,TCIM,WNK1,BORA,MIR21
18_Member	GO Biological Processes	GO:0033674	positive regulation of kinase activity	-2.16713	-0.798915	32/473	207,374,1027,1839,1906,1958,1969,3479,3491,4216,4233,4665,4683,5170,5618,5621,5899,6505,8312,8795,10040,10253,10979,11315,51429,55011,55890,56892,65125,79866,90441,406991	AKT1,AREG,CDKN1B,HBEGF,EDN1,EGR1,EPHA2,IGF1,CCN1,MAP3K4,MET,NAB2,NBN,PDPK1,PRLR,PRNP,RALB,SLC1A1,AXIN1,TNFRSF10B,TOM1L1,SPRY2,FERMT2,PARK7,SNX9,PIH1D1,GPRC5C,TCIM,WNK1,BORA,ZNF622,MIR21
18_Member	GO Biological Processes	GO:0032148	activation of protein kinase B activity	-2.03384	-0.715653	5/31	3479,5170,6505,11315,406991	IGF1,PDPK1,SLC1A1,PARK7,MIR21
19_Summary	GO Molecular Functions	GO:0042803	protein homodimerization activity	-8.18208	-5.53511	63/680	26,207,467,598,1051,1063,1371,1889,2582,2634,3035,3092,3290,3656,4023,4170,4297,4594,4953,6281,6301,6419,6722,7167,7305,7391,7511,8087,8312,8460,8517,8815,8861,8942,9255,9429,9810,10241,10273,11030,11315,23347,23705,25776,26035,26258,51361,51429,54922,54994,55553,57017,64747,79691,81890,112817,116092,120227,122953,131870,166785,201931,253461	AOC1,AKT1,ATF3,BCL2L1,CEBPB,CENPF,CPOX,ECE1,GALE,GBP2,HARS1,HIP1,HSD11B1,IRAK2,LPL,MCL1,KMT2A,MMUT,ODC1,S100A10,SARS1,SETMAR,SRF,TPI1,TYROBP,USF1,XPNPEP1,FXR1,AXIN1,TPST1,IKBKG,BANF1,LDB1,KYNU,AIMP1,ABCG2,RNF40,CALCOCO2,STUB1,RBPMS,PARK7,SMCHD1,CADM1,CBY1,GLCE,BLOC1S6,HOOK1,SNX9,RASIP1,GID8,SOX6,COQ9,MFSD1,QTRT2,QTRT1,HOGA1,DNTTIP1,CYP2R1,JDP2,NUDT16,MMAA,TMEM192,ZBTB38
19_Member	GO Molecular Functions	GO:0042803	protein homodimerization activity	-8.18208	-5.53511	63/680	26,207,467,598,1051,1063,1371,1889,2582,2634,3035,3092,3290,3656,4023,4170,4297,4594,4953,6281,6301,6419,6722,7167,7305,7391,7511,8087,8312,8460,8517,8815,8861,8942,9255,9429,9810,10241,10273,11030,11315,23347,23705,25776,26035,26258,51361,51429,54922,54994,55553,57017,64747,79691,81890,112817,116092,120227,122953,131870,166785,201931,253461	AOC1,AKT1,ATF3,BCL2L1,CEBPB,CENPF,CPOX,ECE1,GALE,GBP2,HARS1,HIP1,HSD11B1,IRAK2,LPL,MCL1,KMT2A,MMUT,ODC1,S100A10,SARS1,SETMAR,SRF,TPI1,TYROBP,USF1,XPNPEP1,FXR1,AXIN1,TPST1,IKBKG,BANF1,LDB1,KYNU,AIMP1,ABCG2,RNF40,CALCOCO2,STUB1,RBPMS,PARK7,SMCHD1,CADM1,CBY1,GLCE,BLOC1S6,HOOK1,SNX9,RASIP1,GID8,SOX6,COQ9,MFSD1,QTRT2,QTRT1,HOGA1,DNTTIP1,CYP2R1,JDP2,NUDT16,MMAA,TMEM192,ZBTB38
20_Summary	GO Biological Processes	GO:0031056	regulation of histone modification	-8.12938	-5.50771	27/176	472,1025,4000,4297,4302,4524,4837,5531,6418,6879,9646,9810,10782,10891,11315,22938,23741,26053,55011,55209,55904,64324,80854,84148,122953,151987,284058	ATM,CDK9,LMNA,KMT2A,MLLT6,MTHFR,NNMT,PPP4C,SET,TAF7,CTR9,RNF40,ZNF274,PPARGC1A,PARK7,SNW1,EID1,AUTS2,PIH1D1,SETD5,KMT2E,NSD1,SETD7,KAT8,JDP2,PPP4R2,KANSL1
20_Member	GO Biological Processes	GO:0031056	regulation of histone modification	-8.12938	-5.50771	27/176	472,1025,4000,4297,4302,4524,4837,5531,6418,6879,9646,9810,10782,10891,11315,22938,23741,26053,55011,55209,55904,64324,80854,84148,122953,151987,284058	ATM,CDK9,LMNA,KMT2A,MLLT6,MTHFR,NNMT,PPP4C,SET,TAF7,CTR9,RNF40,ZNF274,PPARGC1A,PARK7,SNW1,EID1,AUTS2,PIH1D1,SETD5,KMT2E,NSD1,SETD7,KAT8,JDP2,PPP4R2,KANSL1
20_Member	GO Biological Processes	GO:0031060	regulation of histone methylation	-5.99686	-3.69231	15/79	4000,4297,4302,4524,4837,9646,10782,22938,26053,55011,55904,64324,80854,84148,284058	LMNA,KMT2A,MLLT6,MTHFR,NNMT,CTR9,ZNF274,SNW1,AUTS2,PIH1D1,KMT2E,NSD1,SETD7,KAT8,KANSL1
20_Member	GO Biological Processes	GO:0051569	regulation of histone H3-K4 methylation	-4.53698	-2.50571	9/39	4297,4837,9646,22938,26053,55011,55904,84148,284058	KMT2A,NNMT,CTR9,SNW1,AUTS2,PIH1D1,KMT2E,KAT8,KANSL1
20_Member	GO Biological Processes	GO:0051571	positive regulation of histone H3-K4 methylation	-3.98932	-2.08586	7/27	4297,9646,22938,26053,55904,84148,284058	KMT2A,CTR9,SNW1,AUTS2,KMT2E,KAT8,KANSL1
20_Member	GO Biological Processes	GO:0031058	positive regulation of histone modification	-3.93676	-2.04719	14/103	472,1025,4000,4297,9646,9810,10891,22938,26053,55011,55904,84148,122953,284058	ATM,CDK9,LMNA,KMT2A,CTR9,RNF40,PPARGC1A,SNW1,AUTS2,PIH1D1,KMT2E,KAT8,JDP2,KANSL1
20_Member	GO Biological Processes	GO:0031062	positive regulation of histone methylation	-2.94721	-1.33686	8/50	4000,4297,9646,22938,26053,55904,84148,284058	LMNA,KMT2A,CTR9,SNW1,AUTS2,KMT2E,KAT8,KANSL1
